# Supplementary material
Source: publisher figshare collection journal article supplement (https://acs.figshare.com/ndownloader/files/3607104)
Supplement: Supplementary file 1 [file 3607104]

 
#data_New_Global_Publ_Block

data_global

_audit_creation_method            
;
manual editing of the CIF file 
created by SHELXTL Ver. 6.10
;

# 1. SUBMISSION DETAILS

_publ_contact_author_name
;
Raines, Ronald T.
;
_publ_contact_author_address
;
Department of Biochemistry
University of Wisconsin-Madison
433 Babcock Drive
Madison, WI  53706
USA
;

_publ_contact_author_phone    '608-262-8588'
_publ_contact_author_fax      '608-262-3453'
_publ_contact_author_email    rtraines@wisc.edu

_publ_contact_letter
;
Please consider this CIF submission 
for publication in  
;

_publ_requested_journal      
;
;

_publ_requested_category  FA 
# FA 'Full article' 
# FI 'Full submission - inorganic (Acta C)' 
# FO 'Full submission - organic (Acta C)' 
# FM 'Full submission - metal-organic (Acta C)' 
# CI 'CIF-access paper - inorganic (Acta C)' 
# CO 'CIF-access paper - organic (Acta C)' 
# CM 'CIF-access paper - metal-organic (Acta C)' 

# 2. TITLE AND AUTHOR LIST

_publ_section_title  
;
;


loop_
_publ_author_name
_publ_author_address
'Raines, Ronald T.'
;
Department of Biochemistry
University of Wisconsin-Madison
433 Babcock Drive
Madison, WI  53706
USA
;
''
;
Department of Biochemistry
University of Wisconsin-Madison
433 Babcock Drive
Madison, WI  53706
USA
;

_publ_section_synopsis
;
;

_publ_section_abstract
;
;

_publ_section_comment
;
;

_publ_section_references
;
Allen, F.H. (2002). <i>Acta Cryst.</i> <b>B58</b>, 380-388.

Bruker-AXS. (2007-2009). APEX2 (Ver. 2.1-4), <i>SADABS</i>, 
<i>SAINTPLUS</i>,
<i>SHELXTL</i>. Bruker-AXS Inc., Madison, WI, USA.

Bruno, I. J., Cole, J. C.,  Edgington, P. R.,  Kessler, M., 
 Macrae, C. F.,  McCabe, P.,  Pearson, J,  
&  Taylor, R. (2002). <i>Acta Cryst.</i> <b>B58</b>, 389-397.

Cremer D. & Pople J.A.  (1975). <i>J. Am. Chem. Soc.</i> 
<b>97</b>, 1358-1367.

Dolomanov, O. V., Bourhis, L. J., Gildea, R. J., Howard, J. A. K. & Pushmann,
H. (2009). <i>J. Appl. Cryst.</i> <b>42</b>, 339--341.

Frisch, M. J., Trucks, G. W.,
Schlegel, H. B., Scuseria, G. E., Robb, M. A., Cheeseman,
J. R., Montgomery, Jr., J. A., Vreven, T., Kudin, K. N., Burant,
J. C., Millam, J. M., Iyengar, S. S., Tomasi, J., Barone, V.,
Mennucci, B. <i>et al.</i> (2004). 
Gaussian 03, Revision C.02,
Gaussian, Inc., Wallingford, CT, USA.

Sheldrick, G.M. (2008). Acta Cryst. <b>A64</b>, 112-122.

Westrip, S. P. (2009). publCIF. In preparation.
;

_publ_section_acknowledgements
; 

We thank Lara C. Spencer and Dr. Ilia A. Guzei.
;

_publ_section_figure_captions
;
Figure 1.  Molecular structure of (I).  The thermal ellipsoids are 
shown at 50% probability level.
;

_publ_section_exptl_prep
;
;


_publ_section_exptl_refinement
;
All H-atoms were placed in idealized locations and 
refined as riding with appropriate thermal displacement
coefficients U~iso~(H) = 1.2 or 1.5 times U~eq~(bearing atom). 
;

_iucr_refine_instruction_details ?

#3. data 
_chemical_name_systematic         ?
_chemical_name_common             ?
_chemical_melting_point           ?
_chemical_formula_moiety          ?
_chemical_formula_sum             'C10 H15 N O4 S' 
_chemical_formula_weight          245.29

loop_
 _atom_type_symbol
 _atom_type_description
 _atom_type_scat_dispersion_real
 _atom_type_scat_dispersion_imag
 _atom_type_scat_source
 'C'  'C'   0.0033   0.0016
 'International Tables Vol C Tables 4.2.6.8 and 6.1.1.4'
 'H'  'H'   0.0000   0.0000
 'International Tables Vol C Tables 4.2.6.8 and 6.1.1.4'
 'N'  'N'   0.0061   0.0033
 'International Tables Vol C Tables 4.2.6.8 and 6.1.1.4'
 'O'  'O'   0.0106   0.0060
 'International Tables Vol C Tables 4.2.6.8 and 6.1.1.4'
 'S'  'S'   0.1246   0.1234
 'International Tables Vol C Tables 4.2.6.8 and 6.1.1.4'
 
_space_group_crystal_system       orthorhombic
_space_group_IT_number            19
_space_group_name_H-M_alt         'P 21 21 21'
_space_group_name_Hall            'P 2ac 2ab'
_chemical_absolute_configuration  'ad'
# Options are 'rm', 'ad', 'rmad', 'syn', 'unk' or '.'
#                      
# rm   : absolute configuration established by the structure determination
#        of a compound containing a chiral reference molecule of known
#        absolute configuration.
# ad   : absolute configuration established by anomalous dispersion effects
#        in diffraction measurements on the crystal.
# rmad : absolute configuration established by the structure determination
#        of a compound containing a chiral reference molecule of known
#        absolute configuration and confirmed by anomalous dispersion
#        effects in diffraction measurements on the crystal.
# syn  : absolute configuration has not been established by anomalous
#        dispersion effects in diffraction measurements on the crystal.
#        The enantiomer has been assigned by reference to an unchanging
#        chiral centre in the synthetic procedure.
# unk  : absolute configuration is unknown, there being no firm chemical
#        evidence for its assignment to hand and it having not been 
#        established by anomalous dispersion effects in diffraction 
#        measurements on the crystal. An arbitrary choice of enantiomer
#        has been made.
# .    : inapplicable.
 
_shelx_space_group_comment
;
The symmetry employed for this shelxl refinement is uniquely defined
by the following loop, which should always be used as a source of
symmetry information in preference to the above space-group names.
They are only intended as comments.
;
 
loop_
 _space_group_symop_operation_xyz
 'x, y, z'
 '-x+1/2, -y, z+1/2'
 '-x, y+1/2, -z+1/2'
 'x+1/2, -y+1/2, -z'
 
_cell_length_a                    8.4606(3)
_cell_length_b                    9.8014(3)
_cell_length_c                    14.3985(5)
_cell_angle_alpha                 90
_cell_angle_beta                  90
_cell_angle_gamma                 90
_cell_volume                      1194.01(7)
_cell_formula_units_Z             4
_cell_measurement_temperature     100(2)
_cell_measurement_reflns_used     9380 
_cell_measurement_theta_min       2.5138 
_cell_measurement_theta_max       29.9629 
 
_exptl_crystal_description        block 
_exptl_crystal_colour             colorless 
_exptl_crystal_density_meas       ? 
_exptl_crystal_density_method     ?              
_exptl_crystal_density_diffrn     1.365          
_exptl_crystal_F_000              520                                            
_exptl_crystal_size_max           0.450
_exptl_crystal_size_mid           0.240
_exptl_crystal_size_min           0.230
_exptl_absorpt_coefficient_mu     0.270
_shelx_estimated_absorpt_T_min    0.888
_shelx_estimated_absorpt_T_max    0.941
_exptl_absorpt_correction_type    'multi-scan' 
_exptl_absorpt_correction_T_min   0.8881 
_exptl_absorpt_correction_T_max   0.9405  
_exptl_absorpt_process_details    
;
SADABS  (Bruker-AXS, 2003)
;  
_exptl_special_details
;
 ?
;
 
_diffrn_ambient_temperature       100(2)
_diffrn_radiation_wavelength      0.71073
_diffrn_radiation_type            MoK\a
_diffrn_source                'fine-focus sealed tube'                       
_diffrn_measurement_device_type   'Bruker CCD-1000 area detector' 
_diffrn_measurement_method        '0.30\% \w scans'  
_diffrn_detector_area_resol_mean  ? 
_diffrn_reflns_number             17885
_diffrn_reflns_av_unetI/netI      0.0196
_diffrn_reflns_av_R_equivalents   0.0277
_diffrn_reflns_limit_h_min        -11
_diffrn_reflns_limit_h_max        11
_diffrn_reflns_limit_k_min        -13
_diffrn_reflns_limit_k_max        13
_diffrn_reflns_limit_l_min        -19
_diffrn_reflns_limit_l_max        19
_diffrn_reflns_theta_min          2.514
_diffrn_reflns_theta_max          29.999
_diffrn_reflns_theta_full         25.242
_diffrn_measured_fraction_theta_max   0.989
_diffrn_measured_fraction_theta_full  1.000
_diffrn_reflns_Laue_measured_fraction_max    0.989
_diffrn_reflns_Laue_measured_fraction_full   1.000
_diffrn_reflns_point_group_measured_fraction_max   0.990
_diffrn_reflns_point_group_measured_fraction_full  1.000
_reflns_number_total              3407
_reflns_number_gt                 3197
_reflns_threshold_expression      'I > 2\s(I)'
_reflns_Friedel_coverage          0.745
_reflns_Friedel_fraction_max      0.991
_reflns_Friedel_fraction_full     1.000
 
_reflns_special_details
;
 Reflections were merged by SHELXL according to the crystal
 class for the calculation of statistics and refinement.
 
 _reflns_Friedel_fraction is defined as the number of unique
 Friedel pairs measured divided by the number that would be
 possible theoretically, ignoring centric projections and
 systematic absences.
;
 
_computing_data_collection        'SMART Ver. 5.622 (Bruker-AXS, 2003)'
_computing_cell_refinement        'SAINT Ver. 6.22  (Bruker-AXS, 2003)'
_computing_data_reduction         'SAINT Ver. 6.22'
_computing_structure_solution     'SHELXTL Ver. 6.10 (Bruker-AXS, 2003)'
_computing_structure_refinement   'SHELXL-2013 (Sheldrick, 2013)'
_computing_molecular_graphics     'SHELXTL Ver. 6.10'
_computing_publication_material   'SHELXTL Ver. 6.10'
 
_refine_special_details
;
 Refined as a 2-component inversion twin.
;
_refine_ls_structure_factor_coef  Fsqd
_refine_ls_matrix_type            full
_refine_ls_weighting_scheme       calc
_refine_ls_weighting_details
'w=1/[\s^2^(Fo^2^)+(0.0504P)^2^+0.1941P] where P=(Fo^2^+2Fc^2^)/3'
_atom_sites_solution_primary      ?
_atom_sites_solution_secondary    ?
_atom_sites_solution_hydrogens    geom
_refine_ls_hydrogen_treatment     constr
_refine_ls_extinction_method      none
_refine_ls_extinction_coef        .
_refine_ls_abs_structure_details
;
 Refined as an inversion twin.
;
_refine_ls_abs_structure_Flack    0.01(8)
_refine_ls_number_reflns          3407
_refine_ls_number_parameters      149
_refine_ls_number_restraints      0
_refine_ls_R_factor_all           0.0352
_refine_ls_R_factor_gt            0.0315
_refine_ls_wR_factor_ref          0.0822
_refine_ls_wR_factor_gt           0.0786
_refine_ls_goodness_of_fit_ref    1.075
_refine_ls_restrained_S_all       1.075
_refine_ls_shift/su_max           0.000
_refine_ls_shift/su_mean          0.000
 
loop_
 _atom_site_label
 _atom_site_type_symbol
 _atom_site_fract_x
 _atom_site_fract_y
 _atom_site_fract_z
 _atom_site_U_iso_or_equiv
 _atom_site_adp_type
 _atom_site_occupancy
 _atom_site_site_symmetry_order  
 _atom_site_calc_flag
 _atom_site_refinement_flags_posn
 _atom_site_refinement_flags_adp
 _atom_site_refinement_flags_occupancy
 _atom_site_disorder_assembly
 _atom_site_disorder_group
S1 S 0.38361(6) 0.56966(5) 1.01939(3) 0.02789(13) Uani 1 1 d . . . . .
O3 O 0.23857(15) 0.69582(12) 0.65785(8) 0.0184(2) Uani 1 1 d . . . . .
O2 O 0.25409(15) 0.32864(12) 0.79738(9) 0.0202(3) Uani 1 1 d . . . . .
O1 O 0.45077(15) 0.48071(13) 0.77868(9) 0.0218(3) Uani 1 1 d . . . . .
C8 C 0.31917(19) 0.45335(16) 0.80249(10) 0.0152(3) Uani 1 1 d . . . . .
N1 N 0.26300(17) 0.68214(14) 0.86920(9) 0.0155(3) Uani 1 1 d . . . . .
C4 C 0.06898(18) 0.58942(17) 0.76919(11) 0.0169(3) Uani 1 1 d . . . . .
H4A H 0.0627 0.5195 0.7197 0.020 Uiso 1 1 calc R U . . .
H4B H -0.0362 0.5986 0.7986 0.020 Uiso 1 1 calc R U . . .
C5 C 0.12415(19) 0.72542(17) 0.72990(10) 0.0165(3) Uani 1 1 d . . . . .
H5 H 0.0337 0.7806 0.7056 0.020 Uiso 1 1 calc R U . . .
C6 C 0.2063(2) 0.79635(17) 0.81047(11) 0.0170(3) Uani 1 1 d . . . . .
H6A H 0.2957 0.8528 0.7883 0.020 Uiso 1 1 calc R U . . .
H6B H 0.1315 0.8551 0.8451 0.020 Uiso 1 1 calc R U . . .
C3 C 0.19515(18) 0.55085(15) 0.84171(10) 0.0142(3) Uani 1 1 d . . . . .
H3 H 0.1427 0.5077 0.8966 0.017 Uiso 1 1 calc R U . . .
C7 C 0.2586(2) 0.79526(19) 0.59374(12) 0.0219(3) Uani 1 1 d . . . . .
O4 O 0.18596(19) 0.90064(16) 0.59538(12) 0.0388(4) Uani 1 1 d . . . . .
C2 C 0.3451(2) 0.69897(17) 0.94748(11) 0.0191(3) Uani 1 1 d . . . . .
C9 C 0.3517(2) 0.22293(19) 0.75622(15) 0.0263(4) Uani 1 1 d . . . . .
H9A H 0.3613 0.2391 0.6893 0.039 Uiso 1 1 calc R U . . .
H9B H 0.3029 0.1336 0.7669 0.039 Uiso 1 1 calc R U . . .
H9C H 0.4569 0.2247 0.7847 0.039 Uiso 1 1 calc R U . . .
C1 C 0.3967(3) 0.84265(19) 0.96883(14) 0.0288(4) Uani 1 1 d . . . . .
H1A H 0.4545 0.8799 0.9156 0.043 Uiso 1 1 calc R U . . .
H1B H 0.4657 0.8423 1.0235 0.043 Uiso 1 1 calc R U . . .
H1C H 0.3037 0.8992 0.9813 0.043 Uiso 1 1 calc R U . . .
C10 C 0.3817(3) 0.7565(2) 0.52381(12) 0.0308(4) Uani 1 1 d . . . . .
H10A H 0.3353 0.7578 0.4615 0.046 Uiso 1 1 calc R U . . .
H10B H 0.4210 0.6646 0.5376 0.046 Uiso 1 1 calc R U . . .
H10C H 0.4695 0.8216 0.5267 0.046 Uiso 1 1 calc R U . . .
 
loop_
 _atom_site_aniso_label
 _atom_site_aniso_U_11
 _atom_site_aniso_U_22
 _atom_site_aniso_U_33
 _atom_site_aniso_U_23
 _atom_site_aniso_U_13
 _atom_site_aniso_U_12
S1 0.0372(3) 0.0228(2) 0.0237(2) 0.00188(17) -0.01384(19) 0.00142(19)
O3 0.0216(5) 0.0180(5) 0.0156(5) -0.0002(4) 0.0025(4) 0.0009(5)
O2 0.0148(5) 0.0135(5) 0.0324(6) -0.0045(5) 0.0030(5) -0.0012(4)
O1 0.0159(6) 0.0171(6) 0.0325(6) -0.0013(5) 0.0048(5) -0.0002(5)
C8 0.0152(7) 0.0136(7) 0.0167(6) -0.0010(5) -0.0013(5) 0.0000(6)
N1 0.0175(6) 0.0120(6) 0.0171(6) -0.0011(5) -0.0018(5) 0.0012(5)
C4 0.0135(6) 0.0188(8) 0.0182(7) 0.0012(6) -0.0013(6) 0.0003(6)
C5 0.0152(7) 0.0176(7) 0.0168(6) 0.0002(5) -0.0003(6) 0.0030(6)
C6 0.0208(7) 0.0134(7) 0.0167(6) -0.0004(5) -0.0002(6) 0.0034(6)
C3 0.0137(6) 0.0137(7) 0.0151(6) -0.0003(5) 0.0002(5) -0.0002(5)
C7 0.0226(8) 0.0245(9) 0.0187(7) 0.0033(6) -0.0027(6) -0.0060(7)
O4 0.0379(8) 0.0341(9) 0.0444(9) 0.0209(7) 0.0053(7) 0.0078(7)
C2 0.0208(7) 0.0172(7) 0.0194(7) -0.0024(6) -0.0030(6) 0.0013(6)
C9 0.0194(8) 0.0165(8) 0.0430(10) -0.0101(7) 0.0021(7) 0.0016(6)
C1 0.0387(10) 0.0194(8) 0.0285(9) -0.0075(7) -0.0107(8) -0.0006(8)
C10 0.0377(10) 0.0339(10) 0.0208(7) -0.0036(8) 0.0076(8) -0.0133(9)
 
_geom_special_details
;
 All esds (except the esd in the dihedral angle between two l.s. planes)
 are estimated using the full covariance matrix.  The cell esds are taken
 into account individually in the estimation of esds in distances, angles
 and torsion angles; correlations between esds in cell parameters are only
 used when they are defined by crystal symmetry.  An approximate (isotropic)
 treatment of cell esds is used for estimating esds involving l.s. planes.
;
 
loop_
 _geom_bond_atom_site_label_1
 _geom_bond_atom_site_label_2
 _geom_bond_distance
 _geom_bond_site_symmetry_2
 _geom_bond_publ_flag
S1 C2 1.6687(18) . ?
O3 C7 1.353(2) . ?
O3 C5 1.4483(19) . ?
O2 C8 1.343(2) . ?
O2 C9 1.452(2) . ?
O1 C8 1.195(2) . ?
C8 C3 1.527(2) . ?
N1 C2 1.334(2) . ?
N1 C3 1.4635(19) . ?
N1 C6 1.483(2) . ?
C4 C5 1.521(2) . ?
C4 C3 1.540(2) . ?
C5 C6 1.521(2) . ?
C7 O4 1.202(2) . ?
C7 C10 1.498(3) . ?
C2 C1 1.506(2) . ?
 
loop_
 _geom_angle_atom_site_label_1
 _geom_angle_atom_site_label_2
 _geom_angle_atom_site_label_3
 _geom_angle
 _geom_angle_site_symmetry_1
 _geom_angle_site_symmetry_3
 _geom_angle_publ_flag
C7 O3 C5 115.33(13) . . ?
C8 O2 C9 116.03(13) . . ?
O1 C8 O2 124.78(15) . . ?
O1 C8 C3 127.26(15) . . ?
O2 C8 C3 107.95(13) . . ?
C2 N1 C3 122.78(14) . . ?
C2 N1 C6 123.84(14) . . ?
C3 N1 C6 112.50(12) . . ?
C5 C4 C3 104.75(13) . . ?
O3 C5 C6 109.43(13) . . ?
O3 C5 C4 107.22(13) . . ?
C6 C5 C4 104.89(13) . . ?
N1 C6 C5 103.76(13) . . ?
N1 C3 C8 112.37(13) . . ?
N1 C3 C4 103.85(12) . . ?
C8 C3 C4 112.27(13) . . ?
O4 C7 O3 122.81(16) . . ?
O4 C7 C10 125.92(17) . . ?
O3 C7 C10 111.26(16) . . ?
N1 C2 C1 116.05(15) . . ?
N1 C2 S1 122.14(13) . . ?
C1 C2 S1 121.78(13) . . ?
 
loop_
 _geom_torsion_atom_site_label_1
 _geom_torsion_atom_site_label_2
 _geom_torsion_atom_site_label_3
 _geom_torsion_atom_site_label_4
 _geom_torsion
 _geom_torsion_site_symmetry_1
 _geom_torsion_site_symmetry_2
 _geom_torsion_site_symmetry_3
 _geom_torsion_site_symmetry_4
 _geom_torsion_publ_flag
C9 O2 C8 O1 -2.5(2) . . . . ?
C9 O2 C8 C3 176.45(14) . . . . ?
C7 O3 C5 C6 -89.44(16) . . . . ?
C7 O3 C5 C4 157.32(13) . . . . ?
C3 C4 C5 O3 83.65(14) . . . . ?
C3 C4 C5 C6 -32.63(16) . . . . ?
C2 N1 C6 C5 178.77(15) . . . . ?
C3 N1 C6 C5 -11.76(17) . . . . ?
O3 C5 C6 N1 -87.61(14) . . . . ?
C4 C5 C6 N1 27.14(16) . . . . ?
C2 N1 C3 C8 -77.08(19) . . . . ?
C6 N1 C3 C8 113.32(14) . . . . ?
C2 N1 C3 C4 161.34(15) . . . . ?
C6 N1 C3 C4 -8.25(16) . . . . ?
O1 C8 C3 N1 -13.6(2) . . . . ?
O2 C8 C3 N1 167.48(12) . . . . ?
O1 C8 C3 C4 103.06(19) . . . . ?
O2 C8 C3 C4 -75.89(16) . . . . ?
C5 C4 C3 N1 25.00(15) . . . . ?
C5 C4 C3 C8 -96.64(15) . . . . ?
C5 O3 C7 O4 -0.7(3) . . . . ?
C5 O3 C7 C10 178.60(14) . . . . ?
C3 N1 C2 C1 -175.77(15) . . . . ?
C6 N1 C2 C1 -7.4(2) . . . . ?
C3 N1 C2 S1 2.4(2) . . . . ?
C6 N1 C2 S1 170.80(12) . . . . ?
 
_refine_diff_density_max    0.386
_refine_diff_density_min   -0.163
_refine_diff_density_rms    0.055

_shelxl_version_number 2013-4

_shelx_res_file
;
TITL rai19 in P2(1)2(1)2(1)
CELL 0.71073   8.4606   9.8014  14.3985  90.000  90.000  90.000
ZERR    4.00   0.0003   0.0003   0.0005   0.000   0.000   0.000
LATT -1
SYMM 0.5-X, -Y, 0.5+Z
SYMM -X, 0.5+Y, 0.5-Z
SYMM 0.5+X, 0.5-Y, -Z
SFAC C  H  N  O  S
UNIT 40 60 4 16 4
L.S. 100
ACTA
BOND
FMAP 2
PLAN 10
size 0.45 0.24 0.23
twin
conf
TEMP -173
WGHT    0.050400    0.194100
BASF   0.00679
FVAR       0.24306
MOLE 1
S1    5    0.383606    0.569664    1.019386    11.00000    0.03721    0.02279 =
         0.02368    0.00188   -0.01384    0.00142
O3    4    0.238567    0.695820    0.657851    11.00000    0.02161    0.01795 =
         0.01563   -0.00016    0.00252    0.00087
O2    4    0.254086    0.328640    0.797383    11.00000    0.01481    0.01346 =
         0.03242   -0.00452    0.00304   -0.00119
O1    4    0.450765    0.480710    0.778676    11.00000    0.01592    0.01706 =
         0.03246   -0.00130    0.00476   -0.00022
C8    1    0.319170    0.453350    0.802493    11.00000    0.01517    0.01359 =
         0.01670   -0.00104   -0.00128   -0.00005
N1    3    0.262998    0.682135    0.869200    11.00000    0.01749    0.01199 =
         0.01712   -0.00114   -0.00184    0.00120
C4    1    0.068978    0.589423    0.769193    11.00000    0.01355    0.01883 =
         0.01820    0.00120   -0.00131    0.00029
AFIX  23
H4A   2    0.062718    0.519514    0.719702    11.00000   -1.20000
H4B   2   -0.036219    0.598643    0.798641    11.00000   -1.20000
AFIX   0
C5    1    0.124145    0.725416    0.729898    11.00000    0.01524    0.01757 =
         0.01680    0.00023   -0.00034    0.00305
AFIX  13
H5    2    0.033725    0.780589    0.705607    11.00000   -1.20000
AFIX   0
C6    1    0.206268    0.796350    0.810471    11.00000    0.02085    0.01338 =
         0.01672   -0.00036   -0.00023    0.00337
AFIX  23
H6A   2    0.295670    0.852786    0.788291    11.00000   -1.20000
H6B   2    0.131533    0.855093    0.845113    11.00000   -1.20000
AFIX   0
C3    1    0.195153    0.550849    0.841713    11.00000    0.01371    0.01367 =
         0.01512   -0.00033    0.00020   -0.00021
AFIX  13
H3    2    0.142738    0.507692    0.896594    11.00000   -1.20000
AFIX   0
C7    1    0.258551    0.795262    0.593745    11.00000    0.02263    0.02453 =
         0.01867    0.00333   -0.00273   -0.00605
O4    4    0.185963    0.900639    0.595376    11.00000    0.03786    0.03407 =
         0.04439    0.02090    0.00529    0.00779
C2    1    0.345053    0.698972    0.947479    11.00000    0.02075    0.01721 =
         0.01941   -0.00240   -0.00302    0.00133
C9    1    0.351729    0.222929    0.756224    11.00000    0.01939    0.01649 =
         0.04299   -0.01008    0.00207    0.00165
AFIX 137
H9A   2    0.361301    0.239063    0.689289    11.00000   -1.50000
H9B   2    0.302881    0.133638    0.766908    11.00000   -1.50000
H9C   2    0.456924    0.224719    0.784688    11.00000   -1.50000
AFIX   0
C1    1    0.396745    0.842648    0.968833    11.00000    0.03866    0.01937 =
         0.02849   -0.00750   -0.01066   -0.00062
AFIX 137
H1A   2    0.454498    0.879901    0.915562    11.00000   -1.50000
H1B   2    0.465714    0.842270    1.023515    11.00000   -1.50000
H1C   2    0.303654    0.899250    0.981315    11.00000   -1.50000
AFIX   0
C10   1    0.381744    0.756467    0.523814    11.00000    0.03775    0.03388 =
         0.02077   -0.00363    0.00764   -0.01330
AFIX 137
H10A  2    0.335318    0.757835    0.461465    11.00000   -1.50000
H10B  2    0.421002    0.664590    0.537553    11.00000   -1.50000
H10C  2    0.469490    0.821600    0.526684    11.00000   -1.50000
AFIX   0
HKLF 4

REM  rai19 in P2(1)2(1)2(1)
REM R1 =  0.0315 for    3197 Fo > 4sig(Fo)  and  0.0352 for all    3407 data
REM    149 parameters refined using      0 restraints

END

WGHT      0.0504      0.1956

REM Highest difference peak  0.386,  deepest hole -0.163,  1-sigma level  0.055
Q1    1   0.1414  0.5691  0.7987  11.00000  0.05    0.39
Q2    1   0.4525  0.5691  0.9863  11.00000  0.05    0.36
Q3    1   0.2586  0.5034  0.8196  11.00000  0.05    0.34
Q4    1   0.4438  0.5762  1.0614  11.00000  0.05    0.33
Q5    1   0.3008  0.6836  0.9088  11.00000  0.05    0.32
Q6    1   0.3177  0.7744  0.5591  11.00000  0.05    0.32
Q7    1   0.1781  0.7603  0.7659  11.00000  0.05    0.31
Q8    1   0.2482  0.7358  0.8415  11.00000  0.05    0.30
Q9    1   0.3681  0.6254  0.9706  11.00000  0.05    0.28
Q10   1   0.1877  0.7094  0.6864  11.00000  0.05    0.28
;
_shelx_res_checksum   57988

_shelx_hkl_file
;
  -1   0   0   -1.07    0.03
   1   0   0   -1.07    0.02
   1   0   0   -1.05    0.03
  -2   0   0  762.68   19.95
   2   0   0  804.87   20.76
   2   0   0  727.91   19.75
   2   0   0  750.67   20.17
   3   0   0   -0.10    0.03
   3   0   0   -0.12    0.05
   3   0   0   -0.04    0.05
  -3   0   0   -0.14    0.05
  -4   0   0    7.21    0.32
   4   0   0    6.57    0.29
   4   0   0    7.23    0.24
   4   0   0    6.49    0.32
   5   0   0   -0.02    0.05
   5   0   0    0.14    0.10
   5   0   0   -0.07    0.07
  -5   0   0   -0.06    0.07
   6   0   0   48.07    1.51
   6   0   0   48.41    1.43
  -6   0   0   46.86    1.48
   7   0   0    0.00    0.10
  -7   0   0    0.00    0.13
   7   0   0   -0.03    0.12
  -8   0   0   19.42    0.82
   8   0   0   19.89    0.85
   8   0   0   20.14    0.77
   9   0   0   -0.13    0.18
   9   0   0   -0.28    0.17
  -9   0   0   -0.16    0.14
 -10   0   0    5.07    0.47
  10   0   0    4.97    0.42
  10   0   0    5.08    0.48
  11   0   0    0.02    0.22
  11   0   0    0.17    0.25
 -11   0   0   -0.22    0.25
   0   0   1   -0.12    0.01
   0   0  -1   -0.16    0.01
   0   0   1   -0.15    0.01
   1   0   1    0.13    0.03
  -1   0  -1    0.00    0.03
   1   0   1    0.18    0.04
   1   0   1   -0.01    0.03
  -1   0  -1   -0.02    0.03
   1   0  -1   -0.01    0.03
   1   0  -1    0.02    0.03
   1   0  -1    0.02    0.02
  -1   0   1    0.01    0.03
   1   0  -1    0.01    0.01
  -2   0   1  384.44   10.62
   2   0  -1  407.38   10.98
   2   0   1  392.86   10.48
   2   0  -1  394.09   10.52
   2   0  -1  402.50   10.69
   2   0   1  404.91   10.69
   2   0   1  421.29   10.97
  -2   0  -1  418.03   10.48
  -2   0  -1  417.78   10.62
  -3   0   1   16.30    0.54
  -3   0  -1   15.93    0.53
   3   0  -1   16.16    0.54
   3   0   1   16.08    0.54
   3   0  -1   15.17    0.49
  -3   0  -1   16.01    0.49
   3   0   1   16.35    0.48
   3   0   1   15.79    0.51
   3   0  -1   16.24    0.48
   4   0   1    1.55    0.16
   4   0  -1    1.55    0.13
  -4   0   1    1.64    0.16
   4   0  -1    1.46    0.15
   4   0   1    1.28    0.13
  -4   0  -1    1.28    0.15
   4   0  -1    1.54    0.10
  -4   0  -1    1.51    0.13
   5   0   1    0.05    0.10
  -5   0  -1    0.14    0.09
   5   0  -1    0.12    0.05
  -5   0   1    0.07    0.10
   5   0   1    0.13    0.05
   5   0  -1    0.15    0.08
  -5   0  -1    0.16    0.08
   5   0   1    0.34    0.10
   5   0  -1    0.20    0.09
   6   0   1   13.54    0.58
   6   0  -1   13.53    0.52
   6   0   1   13.88    0.53
  -6   0  -1   13.03    0.56
  -6   0   1   12.46    0.56
   6   0  -1   13.16    0.58
  -7   0   1    3.99    0.32
   7   0   1    3.89    0.32
   7   0  -1    3.55    0.27
   7   0  -1    4.13    0.33
   7   0   1    4.09    0.29
  -7   0  -1    4.40    0.31
   8   0  -1    0.17    0.15
   8   0   1    0.66    0.18
  -8   0   1    0.29    0.18
  -8   0  -1    0.23    0.17
   8   0  -1    0.37    0.18
   8   0   1    0.60    0.18
   9   0   1    8.16    0.53
  -9   0   1    6.92    0.49
  -9   0  -1    7.74    0.51
   9   0  -1    7.89    0.47
   9   0   1    7.83    0.49
   9   0  -1    7.73    0.51
  10   0   1    2.55    0.33
 -10   0  -1    2.27    0.35
  10   0   1    3.19    0.39
 -10   0   1    2.22    0.35
  10   0  -1    2.80    0.37
  10   0  -1    2.80    0.34
  11   0  -1    1.25    0.32
  11   0   1    1.10    0.30
  11   0  -1    1.28    0.34
 -11   0  -1    1.50    0.34
 -11   0   1    1.34    0.34
  11   0   1    1.97    0.37
   0   0   2  104.55    2.75
   0   0  -2  102.20    2.72
   0   0  -2  105.22    2.73
   0   0  -2   98.16    2.71
   0   0   2  100.43    2.81
  -1   0   2   36.08    1.01
  -1   0  -2   35.63    0.97
  -1   0  -2   35.82    0.98
   1   0   2   34.88    1.01
  -1   0   2   34.91    0.99
   1   0   2   34.97    0.99
   1   0   2   35.23    0.97
  -1   0   2   34.41    0.99
   2   0  -2   39.47    1.12
  -2   0  -2   39.89    1.10
   2   0  -2   38.56    1.04
   2   0   2   36.57    1.11
  -2   0  -2   39.25    1.08
   2   0  -2   38.16    1.11
   2   0  -2   37.24    1.04
   2   0   2   38.71    1.10
   2   0   2   37.97    1.08
  -2   0   2   39.81    1.12
   3   0  -2    1.33    0.09
  -3   0   2    1.04    0.11
   3   0  -2    1.44    0.10
   3   0  -2    1.17    0.09
   3   0   2    1.06    0.11
   3   0  -2    1.05    0.12
   3   0   2    1.29    0.13
   3   0   2    1.63    0.10
  -3   0  -2    1.13    0.10
  -3   0  -2    1.22    0.12
   4   0   2  243.11    6.53
   4   0   2  245.65    6.73
   4   0  -2  249.59    6.67
  -4   0  -2  247.61    6.61
  -4   0  -2  258.98    6.50
   4   0  -2  228.46    6.48
   4   0  -2  255.15    6.74
   4   0   2  239.75    6.66
   4   0  -2  251.86    6.47
  -4   0   2  263.88    6.64
  -5   0  -2    1.57    0.17
   5   0  -2    1.67    0.15
   5   0  -2    1.77    0.19
   5   0  -2    1.82    0.12
  -5   0  -2    2.04    0.16
   5   0   2    1.94    0.12
   5   0   2    1.68    0.17
  -5   0   2    1.86    0.19
   5   0   2    1.91    0.19
   5   0  -2    2.24    0.16
   6   0  -2    1.26    0.19
  -6   0   2    1.36    0.19
   6   0   2    0.92    0.17
  -6   0  -2    1.02    0.17
   6   0   2    1.01    0.15
   6   0  -2    1.17    0.15
   7   0   2    9.34    0.49
   7   0  -2    9.00    0.42
  -7   0  -2    8.43    0.47
  -7   0   2    9.45    0.49
   7   0   2    9.85    0.46
   7   0  -2    8.66    0.48
   8   0  -2   25.29    0.91
  -8   0  -2   25.06    0.98
  -8   0   2   25.12    1.00
   8   0  -2   26.85    1.03
   8   0   2   26.66    0.96
   8   0   2   25.60    1.01
  -9   0   2    2.91    0.35
   9   0   2    2.49    0.30
   9   0  -2    2.48    0.28
   9   0  -2    2.09    0.31
   9   0   2    2.27    0.31
  -9   0  -2    2.37    0.32
  10   0  -2   13.71    0.66
 -10   0   2   11.47    0.70
  10   0   2   13.10    0.74
 -10   0  -2   13.34    0.71
  10   0   2   13.28    0.69
 -11   0  -2   -0.24    0.24
  11   0  -2   -0.09    0.23
  11   0  -2    0.04    0.27
  11   0   2   -0.31    0.26
 -11   0   2   -0.07    0.26
   0   0   3   -0.07    0.04
   0   0  -3   -0.05    0.03
   0   0   3    0.10    0.05
   0   0  -3   -0.05    0.02
   0   0  -3   -0.09    0.03
   1   0   3    1.12    0.09
  -1   0   3    1.15    0.09
  -1   0  -3    1.14    0.09
   1   0   3    1.08    0.09
  -1   0   3    1.25    0.10
  -1   0   3    1.00    0.09
  -1   0  -3    1.09    0.08
   2   0  -3   77.17    2.21
   2   0   3   76.98    2.12
   2   0   3   81.59    2.20
   2   0  -3   78.65    2.11
  -2   0   3   78.06    2.17
   2   0   3   79.71    2.18
  -2   0  -3   78.42    2.15
   2   0  -3   80.88    2.10
  -2   0  -3   80.07    2.12
   2   0  -3   81.65    2.17
   3   0  -3   19.67    0.61
  -3   0  -3   19.43    0.60
   3   0  -3   19.25    0.56
   3   0  -3   20.15    0.55
  -3   0  -3   19.99    0.63
   3   0   3   19.66    0.60
  -3   0   3   20.00    0.65
   3   0  -3   18.83    0.64
   3   0   3   18.39    0.61
   3   0   3   19.40    0.64
   4   0  -3    0.03    0.05
   4   0  -3    0.04    0.06
   4   0   3    0.00    0.05
  -4   0  -3    0.06    0.08
   4   0   3   -0.02    0.07
   4   0  -3   -0.03    0.08
  -4   0  -3    0.05    0.06
   4   0  -3   -0.07    0.05
   4   0   3   -0.05    0.08
  -4   0   3    0.05    0.08
   5   0   3   22.70    0.68
   5   0  -3   23.50    0.80
   5   0   3   21.96    0.74
   5   0  -3   22.32    0.68
   5   0  -3   21.26    0.69
  -5   0   3   21.04    0.78
  -5   0  -3   21.97    0.71
  -5   0  -3   20.86    0.75
   5   0  -3   22.50    0.67
   5   0   3   20.99    0.78
  -6   0  -3   37.82    1.21
   6   0   3   36.53    1.23
   6   0  -3   36.88    1.13
   6   0  -3   36.49    1.23
   6   0   3   38.04    1.18
  -6   0   3   37.94    1.24
  -7   0  -3    1.21    0.20
   7   0   3    1.30    0.21
   7   0  -3    1.22    0.21
   7   0   3    1.30    0.19
   7   0  -3    1.34    0.17
  -7   0   3    0.85    0.19
   8   0  -3    3.67    0.35
   8   0   3    3.49    0.34
  -8   0   3    3.17    0.35
  -8   0  -3    3.52    0.33
   8   0  -3    3.67    0.29
   8   0   3    3.91    0.33
  -9   0  -3    5.75    0.44
   9   0   3    4.86    0.44
   9   0  -3    5.52    0.46
   9   0   3    4.99    0.41
  -9   0   3    5.22    0.46
   9   0  -3    5.31    0.38
  10   0   3    0.18    0.24
 -10   0  -3    0.02    0.22
  10   0  -3   -0.15    0.20
 -10   0   3   -0.10    0.22
  10   0  -3    0.18    0.20
 -11   0   3   -0.20    0.28
  11   0  -3    0.00    0.24
  11   0  -3    0.07    0.28
  11   0   3    0.07    0.27
 -11   0  -3    0.32    0.29
   0   0  -4  491.09   12.89
   0   0  -4  511.50   13.07
   0   0  -4  481.41   12.91
   0   0   4  506.56   13.45
   0   0   4  500.30   13.18
  -1   0   4  421.93   11.13
  -1   0  -4  417.08   11.06
   1   0   4  429.35   11.41
  -1   0   4  414.65   11.41
  -1   0   4  415.27   11.08
   1   0   4  434.09   11.13
  -1   0  -4  423.04   10.92
  -2   0  -4  408.86   10.31
  -2   0   4  398.82   10.50
   2   0   4  390.38   10.51
   2   0   4  397.22   10.76
  -2   0  -4  404.44   10.44
   2   0   4  385.25   10.31
  -2   0   4  395.96   10.75
  -2   0   4  399.78   10.47
  -3   0  -4   18.72    0.61
   3   0  -4   19.13    0.61
   3   0  -4   19.40    0.53
   3   0   4   18.46    0.63
  -3   0  -4   18.63    0.59
   3   0  -4   19.02    0.52
   3   0   4   19.08    0.60
  -3   0   4   17.92    0.63
   3   0  -4   18.23    0.62
   3   0   4   18.24    0.60
   4   0  -4  384.46    9.96
   4   0  -4  366.52    9.53
   4   0   4  374.95    9.60
  -4   0  -4  362.60    9.57
   4   0  -4  363.29    9.79
  -4   0   4  355.37    9.74
   4   0  -4  376.11    9.51
  -4   0  -4  371.68    9.72
   4   0   4  354.70    9.78
   4   0   4  362.52    9.95
   5   0  -4   11.95    0.43
   5   0  -4   12.40    0.42
   5   0  -4   12.49    0.44
   5   0   4   12.07    0.52
   5   0  -4   11.52    0.51
  -5   0   4   11.89    0.52
   5   0   4   12.54    0.49
  -5   0  -4   12.96    0.48
  -5   0  -4   12.51    0.50
   5   0   4   12.50    0.44
   6   0  -4    0.54    0.11
   6   0  -4    0.65    0.15
   6   0   4    0.34    0.14
  -6   0   4    0.30    0.15
   6   0   4    0.63    0.14
  -6   0  -4    0.43    0.13
  -7   0   4    1.46    0.22
   7   0   4    1.55    0.23
   7   0  -4    1.49    0.23
   7   0   4    1.61    0.21
   7   0  -4    1.35    0.17
  -7   0  -4    1.86    0.23
   8   0   4    3.82    0.35
  -8   0  -4    4.42    0.35
   8   0  -4    4.23    0.30
   8   0   4    4.51    0.37
   8   0  -4    4.56    0.39
  -8   0   4    4.71    0.39
   9   0  -4    1.81    0.32
   9   0  -4    1.68    0.24
  -9   0  -4    2.21    0.30
  -9   0   4    1.81    0.31
   9   0   4    1.78    0.30
 -10   0  -4   -0.12    0.22
  10   0   4   -0.06    0.21
  10   0  -4    0.15    0.16
  10   0  -4    0.19    0.23
 -10   0   4    0.05    0.24
  11   0  -4    0.40    0.26
 -11   0   4    0.75    0.33
 -11   0  -4    1.05    0.36
  11   0  -4    0.57    0.33
  11   0   4    1.20    0.33
   0   0  -5   -0.06    0.03
   0   0   5   -0.05    0.05
   0   0  -5    0.01    0.04
   0   0  -5    0.22    0.05
   0   0   5   -0.09    0.04
   1   0   5   18.18    0.57
   1   0   5   18.31    0.60
  -1   0   5   18.35    0.57
  -1   0  -5   18.10    0.56
  -1   0   5   17.33    0.59
  -1   0  -5   18.54    0.54
   2   0   5   75.03    2.10
   2   0   5   72.32    1.99
  -2   0   5   75.86    2.04
   2   0   5   73.78    2.05
  -2   0   5   71.80    2.06
  -2   0  -5   70.72    1.99
  -2   0   5   74.30    2.09
  -2   0  -5   75.45    2.03
   3   0  -5   13.28    0.49
   3   0   5   14.20    0.48
   3   0  -5   13.26    0.38
   3   0  -5   12.87    0.38
   3   0   5   13.06    0.47
   3   0  -5   13.65    0.49
  -3   0  -5   13.43    0.47
   3   0   5   13.87    0.49
  -3   0   5   13.56    0.51
  -3   0  -5   12.31    0.46
   4   0   5   37.98    1.14
   4   0  -5   38.43    1.17
   4   0  -5   38.76    1.15
   4   0   5   37.23    1.13
  -4   0   5   38.21    1.19
  -4   0  -5   37.80    1.12
   4   0  -5   37.73    1.04
   4   0   5   35.48    1.17
   4   0  -5   37.15    1.03
  -4   0  -5   37.90    1.15
   5   0   5   29.75    0.96
   5   0  -5   28.43    0.80
  -5   0  -5   28.28    0.92
   5   0   5   26.88    0.90
  -5   0  -5   27.61    0.88
   5   0  -5   28.83    0.88
   5   0   5   27.72    0.87
   5   0  -5   26.98    0.82
   5   0  -5   26.24    0.94
  -5   0   5   26.16    0.95
  -6   0  -5   16.02    0.64
  -6   0   5   16.69    0.69
   6   0   5   16.47    0.64
   6   0  -5   15.61    0.55
   6   0   5   16.00    0.67
   6   0  -5   15.69    0.66
   7   0   5    0.83    0.19
  -7   0   5    1.02    0.21
   7   0  -5    0.92    0.20
   7   0   5    1.15    0.22
  -7   0  -5    0.88    0.19
   7   0  -5    0.83    0.14
   8   0  -5   -0.05    0.18
  -8   0  -5   -0.01    0.15
   8   0  -5   -0.12    0.12
  -8   0   5   -0.15    0.16
   8   0   5   -0.16    0.16
   9   0  -5    3.85    0.40
  -9   0   5    3.69    0.41
  -9   0  -5    4.17    0.39
   9   0  -5    3.62    0.31
   9   0   5    3.59    0.39
 -10   0   5    3.69    0.45
 -10   0  -5    4.15    0.43
  10   0  -5    4.99    0.47
  10   0  -5    4.73    0.37
  10   0   5    4.66    0.48
 -11   0   5    0.00    0.28
 -11   0  -5   -0.09    0.26
  11   0  -5   -0.05    0.22
  11   0   5   -0.08    0.28
  11   0  -5    0.24    0.28
   0   0  -6   37.24    1.04
   0   0   6   38.84    1.16
   0   0   6   39.65    1.11
   0   0  -6   37.87    1.04
   0   0  -6   36.75    1.09
   1   0   6   75.55    2.14
   1   0  -6   74.83    1.96
  -1   0  -6   73.06    2.00
   1   0  -6   74.32    2.06
  -1   0  -6   71.17    2.04
   1   0  -6   75.62    1.97
  -1   0   6   75.22    2.14
  -1   0   6   73.73    2.06
   1   0   6   78.85    2.08
  -2   0  -6   38.85    1.10
  -2   0   6   37.61    1.11
  -2   0  -6   37.23    1.08
   2   0   6   39.00    1.12
  -2   0   6   36.27    1.14
   2   0   6   37.26    1.14
  -2   0   6   37.03    1.13
   3   0  -6   39.24    1.19
   3   0   6   39.76    1.16
   3   0   6   40.51    1.21
  -3   0  -6   39.50    1.17
  -3   0   6   39.53    1.22
   3   0  -6   38.89    1.22
  -3   0  -6   37.61    1.15
   3   0   6   42.65    1.22
  -4   0  -6    0.06    0.08
   4   0  -6   -0.04    0.08
  -4   0  -6    0.01    0.08
   4   0   6    0.07    0.09
  -4   0   6   -0.08    0.09
   4   0  -6   -0.02    0.05
   4   0   6    0.03    0.08
   4   0  -6    0.06    0.04
   4   0  -6    0.04    0.09
   4   0   6   -0.04    0.07
   5   0   6   34.25    1.05
   5   0  -6   33.29    0.96
   5   0  -6   33.38    1.11
  -5   0  -6   34.52    1.05
   5   0   6   33.90    1.07
  -5   0   6   34.31    1.13
   5   0   6   31.93    1.10
   5   0  -6   34.07    1.06
  -5   0  -6   32.23    1.07
   5   0  -6   33.01    0.94
   6   0  -6   11.09    0.42
   6   0   6   10.84    0.53
   6   0  -6   11.42    0.54
  -6   0   6   10.96    0.54
  -6   0  -6   12.03    0.52
  -7   0  -6   24.00    0.90
   7   0   6   25.37    0.95
  -7   0   6   23.67    0.95
   7   0  -6   24.22    0.80
   7   0  -6   23.18    0.93
   8   0   6    7.69    0.49
  -8   0   6    7.34    0.50
   8   0  -6    8.08    0.41
  -8   0  -6    7.56    0.46
   8   0  -6    8.48    0.51
   9   0  -6    2.36    0.36
  -9   0   6    2.45    0.34
  -9   0  -6    2.09    0.34
   9   0  -6    2.40    0.26
   9   0   6    2.15    0.33
  10   0  -6   15.91    0.69
  10   0  -6   13.96    0.78
  10   0   6   14.54    0.80
 -10   0  -6   14.63    0.76
 -10   0   6   14.62    0.81
  11   0  -6   11.59    0.76
  11   0  -6   10.65    0.60
   0   0  -7   -0.01    0.05
   0   0  -7   -0.05    0.05
   0   0  -7    0.05    0.04
   0   0   7    0.00    0.06
   0   0   7    0.04    0.07
  -1   0   7    1.13    0.12
   1   0   7    1.02    0.13
  -1   0  -7    1.10    0.11
  -1   0  -7    1.13    0.10
  -1   0   7    1.02    0.12
  -1   0  -7    0.77    0.10
   1   0  -7    1.07    0.12
   1   0  -7    1.11    0.07
   1   0  -7    1.03    0.08
   1   0   7    1.09    0.13
  -2   0   7   11.90    0.47
  -2   0   7   11.67    0.47
   2   0   7   12.51    0.48
  -2   0  -7   11.70    0.43
  -2   0   7   12.40    0.45
  -2   0  -7   11.98    0.43
   2   0   7   12.46    0.46
   3   0   7    0.00    0.09
  -3   0  -7    0.10    0.08
  -3   0  -7   -0.09    0.06
   3   0   7    0.00    0.08
   3   0   7    0.03    0.07
  -3   0   7    0.14    0.09
  -3   0   7    0.13    0.08
  -4   0   7    5.64    0.34
   4   0  -7    6.01    0.21
  -4   0  -7    6.46    0.31
   4   0   7    6.47    0.32
   4   0   7    5.75    0.30
  -4   0  -7    5.87    0.30
   4   0  -7    5.89    0.32
   4   0   7    5.58    0.32
   4   0  -7    6.14    0.32
   4   0  -7    5.64    0.21
   5   0   7    0.90    0.16
   5   0   7    0.91    0.14
  -5   0  -7    1.01    0.15
  -5   0   7    0.53    0.16
   5   0  -7    1.14    0.16
  -5   0  -7    0.99    0.16
   5   0  -7    0.77    0.10
   5   0  -7    1.09    0.18
   6   0   7    4.82    0.34
  -6   0   7    4.73    0.36
   6   0  -7    5.45    0.37
   6   0  -7    5.19    0.25
  -6   0  -7    5.24    0.33
   7   0   7    0.09    0.14
  -7   0  -7    0.15    0.13
   7   0  -7    0.16    0.17
   7   0  -7   -0.09    0.10
  -7   0   7    0.04    0.16
  -8   0   7   25.94    1.08
   8   0  -7   26.92    1.06
  -8   0  -7   26.89    1.01
   8   0  -7   26.41    0.90
   8   0   7   26.07    1.05
  -9   0   7    5.44    0.50
   9   0  -7    6.20    0.36
   9   0   7    6.30    0.51
  -9   0  -7    6.24    0.46
   9   0  -7    6.17    0.48
 -10   0   7    2.96    0.43
  10   0  -7    2.71    0.41
  10   0  -7    2.46    0.29
  10   0   7    2.99    0.40
   0   0  -8   10.50    0.36
   0   0  -8   10.17    0.40
   0   0   8   10.32    0.44
   0   0   8   11.35    0.42
   0   0  -8   11.08    0.37
   1   0   8   14.14    0.51
  -1   0   8   14.07    0.50
  -1   0  -8   13.80    0.46
   1   0   8   14.30    0.54
  -1   0   8   14.17    0.54
   1   0  -8   13.25    0.41
  -1   0  -8   14.21    0.48
  -1   0  -8   12.63    0.48
   1   0  -8   13.78    0.50
   1   0  -8   13.69    0.42
   2   0   8   22.02    0.76
  -2   0  -8   21.37    0.68
  -2   0  -8   21.12    0.69
   2   0   8   22.35    0.73
   2   0  -8   20.44    0.72
  -2   0   8   21.04    0.75
  -2   0   8   21.07    0.70
  -3   0  -8   32.78    1.01
   3   0   8   33.69    1.08
   3   0   8   32.40    1.06
  -3   0  -8   33.91    1.03
  -3   0   8   31.73    1.07
  -3   0   8   34.32    1.04
   4   0   8   29.60    1.02
   4   0  -8   31.33    0.85
  -4   0   8   30.23    1.05
   4   0  -8   32.11    0.85
  -4   0  -8   30.50    0.99
  -4   0  -8   31.52    0.99
   4   0  -8   30.87    1.02
   4   0   8   31.85    1.03
   4   0  -8   31.39    1.04
   5   0  -8   12.79    0.42
   5   0  -8   12.80    0.54
  -5   0  -8   12.35    0.53
   5   0   8   12.32    0.56
  -5   0   8   12.82    0.59
  -5   0  -8   12.75    0.52
   5   0   8   13.35    0.53
   5   0  -8   13.28    0.57
   6   0  -8   12.87    0.46
  -6   0   8   13.65    0.64
  -6   0  -8   12.88    0.57
   6   0  -8   13.56    0.62
   6   0   8   12.77    0.60
  -7   0   8    8.03    0.51
  -7   0  -8    8.17    0.47
   7   0   8    8.73    0.50
   7   0  -8    9.17    0.39
   7   0  -8    8.92    0.52
  -8   0   8    9.51    0.58
   8   0   8    9.39    0.57
   8   0  -8    9.00    0.55
  -8   0  -8    8.99    0.53
   8   0  -8    9.84    0.44
   9   0  -8    7.05    0.40
   9   0   8    7.21    0.53
   9   0  -8    6.38    0.51
  -9   0   8    6.59    0.56
  10   0  -8   -0.24    0.18
  10   0   8   -0.10    0.23
 -10   0   8    0.19    0.29
   0   0  -9    0.00    0.06
   0   0  -9    0.15    0.08
   0   0   9    0.03    0.08
   0   0   9   -0.01    0.09
   0   0  -9   -0.04    0.05
   1   0  -9    4.03    0.19
  -1   0   9    4.26    0.27
   1   0  -9    3.95    0.17
   1   0   9    4.54    0.26
  -1   0  -9    4.11    0.23
   1   0   9    3.89    0.26
   1   0  -9    3.83    0.23
  -1   0  -9    4.12    0.21
  -1   0   9    4.28    0.24
  -2   0   9   38.84    1.17
   2   0   9   38.40    1.24
   2   0   9   39.68    1.20
  -2   0   9   36.91    1.23
  -2   0  -9   38.84    1.14
   2   0  -9   37.56    1.03
   2   0  -9   38.45    1.04
  -2   0  -9   39.22    1.16
   2   0  -9   37.77    1.18
  -3   0   9    0.95    0.15
  -3   0  -9    0.81    0.13
   3   0   9    0.88    0.15
   3   0   9    0.67    0.14
  -3   0  -9    0.58    0.11
  -3   0   9    0.62    0.13
  -3   0   9    0.71    0.14
   4   0  -9   -0.08    0.10
  -4   0  -9   -0.02    0.08
   4   0  -9    0.01    0.05
   4   0   9   -0.04    0.09
   4   0  -9   -0.11    0.11
  -4   0  -9   -0.14    0.09
   4   0   9    0.03    0.10
  -4   0   9   -0.05    0.12
   5   0  -9    5.57    0.35
   5   0   9    5.58    0.36
   5   0  -9    5.69    0.23
  -5   0  -9    5.86    0.34
  -5   0  -9    5.28    0.32
   5   0  -9    5.54    0.35
  -5   0   9    5.51    0.38
   5   0   9    5.79    0.34
   6   0   9    0.56    0.15
   6   0  -9    0.62    0.19
  -6   0   9    0.40    0.17
   6   0  -9    0.44    0.10
   6   0   9    0.52    0.18
  -6   0  -9    0.53    0.16
  -7   0   9    0.27    0.18
   7   0  -9    0.44    0.12
   7   0  -9    0.32    0.20
  -7   0  -9    0.18    0.16
   7   0   9    0.58    0.20
   8   0   9    0.72    0.23
   8   0  -9    0.70    0.24
   8   0  -9    0.94    0.17
  -8   0   9    0.41    0.24
   9   0   9    0.99    0.28
   9   0  -9    1.34    0.22
  -9   0   9    1.14    0.31
  10   0   9    2.00    0.38
 -10   0   9    2.18    0.37
  10   0  -9    2.25    0.28
   0   0 -10    9.92    0.36
   0   0  10   11.06    0.44
   0   0 -10   10.51    0.43
   0   0  10    9.08    0.45
  -1   0 -10    0.24    0.08
  -1   0  10    0.36    0.12
  -1   0  10    0.25    0.10
   1   0 -10    0.14    0.06
   1   0 -10    0.17    0.08
   1   0  10    0.18    0.10
  -1   0 -10    0.29    0.10
   1   0 -10    0.28    0.10
   1   0  10    0.04    0.11
   2   0 -10    1.88    0.11
   2   0 -10    1.79    0.12
   2   0  10    1.94    0.21
  -2   0 -10    1.96    0.17
   2   0 -10    1.55    0.18
   2   0  10    2.12    0.21
  -2   0  10    2.16    0.22
  -2   0 -10    2.16    0.19
  -2   0  10    1.99    0.19
  -3   0  10   28.81    0.99
   3   0  10   28.84    0.99
  -3   0 -10   28.34    0.91
  -3   0  10   29.52    0.94
   3   0 -10   26.98    0.77
   3   0 -10   27.79    0.96
   3   0 -10   29.82    0.78
  -3   0 -10   28.36    0.93
   3   0  10   27.05    0.95
  -4   0 -10    4.92    0.30
   4   0  10    4.57    0.31
   4   0  10    4.62    0.31
  -4   0 -10    4.51    0.29
   4   0 -10    4.90    0.34
   4   0 -10    4.48    0.18
   4   0 -10    4.59    0.17
   4   0 -10    4.39    0.30
  -4   0  10    4.82    0.34
   5   0 -10   70.64    2.09
   5   0  10   69.00    2.10
  -5   0  10   70.07    2.14
  -5   0 -10   68.23    2.04
   5   0  10   70.42    2.11
   5   0 -10   71.93    1.86
  -5   0 -10   66.20    2.02
   5   0 -10   65.92    2.12
   6   0  10    1.91    0.24
   6   0  10    2.01    0.27
  -6   0  10    2.27    0.29
   6   0 -10    1.95    0.26
  -6   0 -10    1.62    0.22
   6   0 -10    1.86    0.15
   7   0 -10    4.97    0.27
  -7   0  10    5.21    0.44
   7   0  10    4.86    0.41
   8   0  10   -0.20    0.19
   8   0 -10    0.09    0.14
  -8   0  10    0.09    0.21
   9   0 -10    0.07    0.16
  -9   0  10    0.19    0.27
   9   0  10    0.26    0.26
  10   0  10    1.52    0.35
   0   0  11   -0.05    0.09
   0   0 -11   -0.03    0.08
   0   0  11   -0.03    0.10
   0   0 -11   -0.09    0.06
   1   0  11    1.20    0.19
   1   0 -11    1.17    0.11
  -1   0 -11    1.26    0.14
   1   0  11    1.13    0.19
  -1   0  11    1.28    0.16
  -1   0  11    1.11    0.17
  -1   0 -11    1.11    0.15
   1   0 -11    1.16    0.16
   2   0 -11    3.96    0.20
  -2   0  11    4.22    0.27
   2   0 -11    3.82    0.17
   2   0 -11    3.58    0.26
   2   0  11    4.02    0.29
  -2   0 -11    4.03    0.26
  -2   0 -11    4.10    0.24
  -2   0  11    3.83    0.29
   2   0  11    3.88    0.29
   3   0  11    1.76    0.22
  -3   0 -11    1.50    0.17
   3   0 -11    1.27    0.19
   3   0  11    1.30    0.20
   3   0 -11    1.52    0.11
  -3   0 -11    1.37    0.18
  -3   0  11    1.24    0.18
   3   0 -11    1.39    0.10
  -4   0 -11    1.88    0.21
   4   0  11    1.65    0.22
  -4   0 -11    1.96    0.22
   4   0 -11    1.84    0.21
   4   0 -11    1.68    0.24
   4   0  11    1.91    0.22
   4   0 -11    1.71    0.11
   5   0 -11   13.94    0.44
  -5   0  11   14.06    0.66
   5   0  11   13.42    0.62
  -5   0 -11   14.34    0.60
   5   0  11   13.55    0.62
   5   0 -11   13.90    0.63
   6   0  11    0.04    0.14
   6   0 -11    0.14    0.09
  -6   0  11   -0.29    0.15
   6   0  11    0.03    0.15
   7   0  11   12.96    0.68
  -7   0  11   13.84    0.73
   7   0 -11   14.13    0.50
  -8   0  11    0.87    0.31
   8   0  11    0.74    0.28
   8   0 -11    0.98    0.17
  -9   0  11    0.28    0.29
   9   0  11    0.08    0.25
   9   0 -11    0.48    0.18
   0   0  12    1.87    0.22
   0   0 -12    2.10    0.17
   0   0  12    1.83    0.21
   0   0 -12    1.95    0.19
   1   0  12   20.57    0.75
   1   0  12   19.04    0.78
  -1   0  12   21.42    0.74
   1   0 -12   21.57    0.74
   1   0 -12   19.14    0.62
  -1   0 -12   19.51    0.67
  -1   0 -12   19.46    0.71
  -1   0  12   19.35    0.79
  -2   0 -12    0.52    0.15
   2   0 -12    0.58    0.09
  -2   0  12    0.70    0.15
  -2   0  12    0.62    0.18
   2   0  12    0.55    0.17
  -2   0 -12    0.39    0.13
   2   0  12    0.60    0.16
   2   0 -12    0.61    0.14
   3   0 -12   41.68    1.15
  -3   0 -12   42.95    1.31
   3   0 -12   42.37    1.36
   3   0  12   41.42    1.42
   3   0  12   42.71    1.38
   4   0  12   -0.13    0.12
   4   0 -12   -0.13    0.13
   4   0 -12    0.11    0.06
   4   0  12    0.14    0.15
  -4   0 -12   -0.03    0.12
   4   0 -12    0.01    0.14
   5   0  12    0.64    0.20
  -5   0 -12    0.60    0.16
   5   0 -12    0.75    0.21
   5   0 -12    0.65    0.09
  -5   0  12    0.35    0.20
   5   0  12    0.78    0.19
  -6   0  12    0.00    0.18
   6   0  12   -0.03    0.16
   6   0  12    0.04    0.17
   6   0 -12    0.09    0.09
   7   0  12    1.26    0.27
  -7   0  12    0.43    0.25
   7   0 -12    1.36    0.15
   8   0 -12    0.31    0.15
   8   0  12    0.40    0.25
  -8   0  12    0.11    0.25
   9   0  12    0.68    0.30
  -9   0  12    0.64    0.33
   9   0 -12    0.89    0.21
   0   0  13   -0.08    0.12
   0   0 -13   -0.19    0.08
   0   0  13    0.04    0.11
   0   0 -13    0.07    0.12
   1   0  13   20.86    0.78
  -1   0  13   20.13    0.83
  -1   0 -13   20.35    0.69
   1   0 -13   19.58    0.64
   1   0 -13   19.55    0.75
  -1   0 -13   21.05    0.75
   1   0  13   19.55    0.82
   2   0 -13    0.13    0.08
   2   0  13    0.00    0.13
   2   0  13    0.04    0.13
  -2   0  13   -0.06    0.11
   2   0 -13    0.18    0.12
  -2   0 -13   -0.02    0.10
   3   0  13   14.37    0.67
  -3   0 -13   14.53    0.58
   3   0 -13   14.79    0.64
   3   0 -13   14.43    0.46
   3   0 -13   14.43    0.70
   3   0  13   14.36    0.64
   4   0 -13    2.52    0.14
   4   0  13    3.10    0.30
   4   0 -13    2.46    0.27
   4   0 -13    2.44    0.30
   4   0  13    2.18    0.27
  -4   0 -13    2.44    0.25
  -5   0 -13   -0.07    0.14
   5   0 -13   -0.01    0.07
   5   0 -13    0.04    0.18
   5   0  13   -0.21    0.17
   5   0 -13    0.08    0.16
   5   0  13    0.13    0.15
   6   0  13    0.69    0.21
   6   0  13    0.56    0.22
   6   0 -13    0.55    0.10
   7   0  13    0.35    0.22
  -7   0  13    0.18    0.23
   7   0 -13    0.24    0.12
   8   0  13    0.63    0.28
   8   0 -13    0.59    0.16
  -8   0  13    0.17    0.29
   9   0  13    0.00    0.30
   0   0 -14    0.95    0.14
   0   0  14    0.64    0.17
   1   0 -14  115.98    3.23
   1   0  14  114.52    3.42
  -1   0  14  112.02    3.42
  -1   0 -14  115.12    3.13
   1   0 -14  112.67    3.07
  -2   0 -14    0.47    0.14
   2   0 -14    0.45    0.16
   2   0  14    0.03    0.18
   2   0 -14    0.54    0.10
  -2   0  14    0.58    0.18
   2   0  14    0.72    0.19
   3   0 -14    4.14    0.34
   3   0  14    4.53    0.39
   3   0  14    4.26    0.36
  -3   0 -14    4.47    0.31
   3   0 -14    4.24    0.40
   3   0 -14    4.77    0.22
  -4   0 -14   10.77    0.51
   4   0  14   11.03    0.59
   4   0 -14    9.67    0.58
   4   0  14   10.74    0.57
   4   0 -14    9.79    0.54
   4   0 -14   10.71    0.36
  -5   0 -14    1.77    0.25
   5   0  14    1.50    0.25
   5   0 -14    1.89    0.29
   5   0  14    1.76    0.28
   5   0 -14    1.54    0.12
   5   0 -14    1.57    0.27
   6   0 -14    3.16    0.38
   6   0  14    2.84    0.36
   6   0 -14    2.82    0.18
   7   0 -14   30.71    1.22
   7   0  14   28.74    1.19
   7   0 -14   30.81    0.90
   8   0  14    0.76    0.28
   8   0 -14    0.30    0.15
   0   0  15    0.05    0.14
   0   0 -15   -0.06    0.10
  -1   0  15   10.74    0.59
   1   0 -15    9.65    0.40
   1   0  15   10.57    0.58
  -1   0 -15   10.02    0.45
   2   0  15    1.20    0.24
  -2   0  15    0.66    0.21
  -2   0 -15    1.07    0.18
   2   0 -15    1.04    0.14
   3   0 -15   15.93    0.80
   3   0  15   16.25    0.78
   3   0 -15   18.02    0.74
   3   0 -15   16.38    0.54
  -3   0 -15   17.57    0.69
   4   0  15   -0.17    0.15
  -4   0 -15    0.04    0.16
   4   0 -15    0.02    0.08
   4   0 -15   -0.36    0.16
   4   0 -15    0.10    0.17
   5   0  15    3.89    0.38
  -5   0 -15    3.72    0.34
   5   0 -15    3.62    0.39
   5   0 -15    3.47    0.19
   5   0 -15    2.84    0.34
   5   0  15    4.30    0.40
   6   0  15    7.43    0.51
   6   0 -15    8.03    0.55
   6   0 -15    7.39    0.30
   7   0 -15    2.02    0.17
   7   0  15    1.50    0.36
   7   0 -15    2.53    0.39
   8   0 -15    1.38    0.40
   8   0  15    0.53    0.37
   8   0 -15    1.16    0.18
   0   0  16   27.79    1.12
   0   0 -16   27.52    0.91
   1   0  16    0.30    0.19
  -1   0 -16    0.60    0.15
  -1   0  16    0.56    0.21
   1   0 -16    0.43    0.13
  -2   0 -16   -0.10    0.12
   2   0  16    0.01    0.15
   2   0 -16    0.08    0.10
  -3   0 -16   33.41    1.15
   3   0  16   34.18    1.30
   3   0 -16   31.43    1.32
   3   0 -16   35.44    1.01
  -4   0 -16    0.92    0.21
   4   0  16    0.93    0.25
   4   0 -16    0.80    0.13
   4   0 -16    0.93    0.28
   5   0 -16    4.64    0.46
  -5   0 -16    4.02    0.36
   5   0 -16    3.82    0.20
   5   0  16    3.97    0.40
   5   0 -16    3.61    0.38
   6   0 -16    1.66    0.33
   6   0 -16    2.63    0.18
   7   0 -16    0.41    0.12
   7   0 -16    0.06    0.27
   0   0  17    0.42    0.21
   0   0 -17    0.29    0.14
  -1   0  17    1.88    0.31
  -1   0 -17    2.03    0.22
   1   0 -17    1.78    0.19
   1   0  17    1.89    0.31
   2   0 -17    0.60    0.27
   2   0 -17    0.89    0.15
   2   0  17    0.86    0.25
  -2   0 -17    1.04    0.20
   3   0 -17    1.20    0.16
   3   0  17    1.35    0.29
   3   0 -17    1.21    0.31
  -3   0 -17    1.27    0.23
   4   0 -17    0.07    0.12
   4   0  17   -0.16    0.19
   4   0 -17    0.03    0.23
  -4   0 -17    0.07    0.17
  -5   0 -17    7.60    0.49
   5   0  17    7.08    0.54
   5   0 -17    7.47    0.57
   5   0 -17    7.64    0.31
   0   0 -18    7.56    0.39
   0   0  18    6.87    0.54
  -1   0 -18    0.09    0.16
   1   0 -18    0.13    0.14
   1   0  18    0.06    0.20
   2   0 -18    3.47    0.42
   2   0 -18    4.10    0.26
   2   0  18    3.74    0.42
  -2   0 -18    4.49    0.34
   3   0  18   16.01    0.85
  -3   0 -18   16.93    0.73
   3   0 -18   16.62    0.58
   3   0 -18   16.13    0.89
   4   0 -18    1.74    0.18
   4   0 -18    1.60    0.35
  -4   0 -18    1.63    0.30
   4   0  18    0.99    0.29
   5   0 -18    9.68    0.69
   5   0  18   10.90    0.69
  -5   0 -18   11.05    0.62
   5   0 -18   10.59    0.41
   0   0 -19    0.14    0.16
   1   0  19    5.03    0.50
   1   0 -19    4.72    0.32
   1   0 -19    4.92    0.52
  -1   0 -19    4.69    0.36
   2   0 -19    0.67    0.33
  -2   0 -19    1.63    0.26
   2   0 -19    1.52    0.20
   2   0  19    1.10    0.31
   3   0  19    3.10    0.43
   3   0 -19    2.75    0.23
  -3   0 -19    3.49    0.34
   3   0 -19    1.75    0.40
   4   0 -19   -0.17    0.29
   4   0 -19    0.42    0.16
   0   1   0   -0.38    0.02
   0  -1   0   -0.43    0.02
   0   1   0   -0.34    0.02
   0   1   0   -0.39    0.02
   1   1   0  423.09   10.94
   1  -1   0  414.98   10.97
   1   1   0  414.09   11.41
  -1  -1   0  425.05   11.10
   1  -1   0  435.36   11.13
  -1  -1   0  421.01   10.95
  -1   1   0  416.69   11.09
   1   1   0  415.74   11.14
  -2   1   0    0.01    0.05
  -2  -1   0    0.12    0.05
   2   1   0    0.04    0.05
   2  -1   0    0.06    0.04
   2   1   0    0.23    0.05
  -2  -1   0   -0.03    0.04
   2  -1   0    0.03    0.05
   2   1   0    0.08    0.04
  -3   1   0   67.24    1.94
   3   1   0   68.75    1.94
   3   1   0   70.42    1.89
   3   1   0   71.91    1.94
   3  -1   0   70.20    1.89
   3  -1   0   66.57    1.96
  -3  -1   0   72.15    1.93
  -4  -1   0   41.88    1.23
   4   1   0   40.35    1.18
   4   1   0   42.96    1.20
   4  -1   0   41.35    1.19
   4  -1   0   42.07    1.26
   4   1   0   38.53    1.23
  -4   1   0   41.19    1.24
   5  -1   0   17.82    0.60
   5   1   0   16.32    0.63
   5   1   0   17.13    0.59
   5   1   0   17.13    0.55
  -5  -1   0   16.54    0.62
   5  -1   0   16.79    0.65
  -5   1   0   16.70    0.63
   6   1   0   35.47    1.19
  -6   1   0   37.71    1.21
   6   1   0   37.68    1.15
  -6  -1   0   36.08    1.19
   6  -1   0   37.24    1.23
   6  -1   0   35.84    1.14
  -7  -1   0    5.12    0.35
  -7   1   0    5.48    0.36
   7  -1   0    5.60    0.34
   7   1   0    5.18    0.36
   7  -1   0    5.13    0.38
   7   1   0    5.86    0.34
   8  -1   0    0.27    0.18
   8   1   0    0.54    0.17
   8  -1   0    0.39    0.17
   8   1   0    0.40    0.17
  -8  -1   0    0.36    0.17
  -8   1   0    0.45    0.18
  -9   1   0    1.15    0.27
  -9  -1   0    1.09    0.26
   9   1   0    1.13    0.25
   9   1   0    0.83    0.21
   9  -1   0    1.08    0.26
   9  -1   0    0.99    0.22
 -10  -1   0    0.54    0.25
  10   1   0    0.94    0.27
  10   1   0    0.78    0.25
 -10   1   0    0.74    0.26
  10  -1   0    1.14    0.27
  10  -1   0    1.17    0.28
 -11   1   0    0.08    0.24
  11  -1   0   -0.17    0.27
 -11  -1   0    0.19    0.29
  11   1   0   -0.04    0.24
  11  -1   0    0.04    0.23
  11   1   0   -0.25    0.24
   0   1  -1    4.97    0.17
   0   1  -1    4.99    0.16
   0   1  -1    5.01    0.18
   0   1   1    5.04    0.17
   0   1   1    4.72    0.18
   0  -1  -1    5.31    0.15
   1   1   1  284.41    7.42
  -1   1  -1  265.20    7.19
   1   1   1  266.80    7.10
  -1   1  -1  263.91    7.09
   1  -1  -1  278.78    7.15
  -1   1  -1  280.67    7.44
   1  -1  -1  272.50    7.15
   1   1   1  274.66    7.24
  -1  -1   1  277.10    7.20
   1   1  -1  282.49    7.47
  -1  -1  -1  285.32    7.30
  -1   1   1  286.93    7.68
  -1   1   1  280.49    7.45
   1  -1   1  280.94    7.45
   1  -1   1  279.94    7.31
  -1   1   1  286.91    7.40
   1   1  -1  274.57    7.31
  -1  -1  -1  281.97    7.42
   1   1  -1  277.88    7.63
   2  -1  -1   26.23    0.74
  -2  -1   1   26.37    0.78
   2   1   1   26.98    0.79
  -2   1  -1   27.24    0.75
  -2   1  -1   28.22    0.75
   2  -1  -1   25.29    0.80
   2   1   1   25.89    0.76
   2   1   1   27.32    0.78
   2  -1   1   28.06    0.81
  -2  -1  -1   27.20    0.78
   2  -1   1   27.74    0.78
  -2   1   1   26.91    0.76
   2   1  -1   26.88    0.79
   2   1  -1   26.67    0.79
   2   1  -1   26.40    0.76
  -2   1   1   27.49    0.80
  -2  -1  -1   27.67    0.77
   3  -1  -1   17.03    0.60
  -3  -1   1   17.87    0.60
  -3   1  -1   18.73    0.55
  -3   1  -1   18.50    0.60
   3   1   1   18.03    0.57
   3   1   1   17.67    0.59
   3   1   1   19.21    0.57
   3  -1  -1   18.35    0.55
  -3   1   1   18.42    0.61
   3   1  -1   18.54    0.60
  -3  -1  -1   18.88    0.57
   3   1  -1   18.67    0.58
   3   1  -1   18.36    0.57
   3  -1   1   18.92    0.59
   3  -1   1   19.46    0.63
   3  -1   1   19.46    0.54
  -4   1  -1   46.32    1.29
   4  -1  -1   46.06    1.39
   4   1   1   48.21    1.33
  -4   1  -1   47.07    1.37
  -4  -1   1   46.19    1.37
   4   1   1   43.91    1.31
   4   1   1   44.49    1.36
   4  -1  -1   45.84    1.30
  -4   1   1   45.99    1.37
   4   1  -1   47.45    1.32
   4  -1   1   45.57    1.32
   4  -1   1   44.87    1.38
   4   1  -1   43.83    1.36
   4   1  -1   46.29    1.30
  -4  -1  -1   46.04    1.29
  -4  -1  -1   47.34    1.35
   5  -1  -1   43.49    1.38
  -5  -1   1   43.52    1.36
   5   1   1   46.17    1.29
   5  -1  -1   43.89    1.29
  -5   1  -1   42.69    1.35
   5   1   1   45.41    1.37
   5   1   1   45.22    1.31
   5   1  -1   42.98    1.27
   5  -1   1   43.79    1.30
  -5  -1  -1   45.81    1.26
   5   1  -1   42.24    1.34
  -5  -1  -1   44.67    1.33
   5  -1   1   41.63    1.36
   5   1  -1   45.32    1.27
  -5   1   1   42.82    1.34
   6   1   1   15.12    0.61
  -6  -1   1   14.40    0.60
   6  -1  -1   14.91    0.56
   6   1   1   14.25    0.56
  -6   1  -1   14.54    0.60
   6  -1  -1   14.49    0.62
   6   1  -1   14.17    0.59
  -6  -1  -1   14.51    0.58
   6  -1   1   14.77    0.56
   6   1  -1   14.26    0.55
  -6   1   1   14.38    0.60
   6  -1   1   13.40    0.60
  -7   1  -1    7.85    0.45
   7  -1  -1    7.98    0.40
   7  -1  -1    8.01    0.47
  -7  -1   1    8.17    0.45
   7   1   1    8.30    0.46
   7   1   1    8.59    0.43
   7  -1   1    8.62    0.43
  -7   1   1    7.93    0.45
  -7  -1  -1    7.29    0.42
   7   1  -1    7.51    0.44
   7  -1   1    8.25    0.47
   7   1  -1    8.06    0.40
  -8   1  -1    4.33    0.37
   8  -1  -1    4.16    0.38
   8  -1  -1    4.03    0.31
   8   1   1    4.09    0.32
   8   1   1    4.11    0.36
  -8  -1   1    3.98    0.36
   8  -1   1    4.16    0.38
   8   1  -1    3.48    0.35
   8  -1   1    4.25    0.33
  -8  -1  -1    4.43    0.36
  -8   1   1    3.91    0.36
   8   1  -1    3.72    0.30
   9   1   1    7.46    0.50
  -9   1  -1    7.06    0.49
   9   1   1    7.33    0.45
  -9  -1   1    6.47    0.48
   9  -1  -1    7.02    0.43
   9  -1  -1    6.79    0.49
   9  -1   1    6.80    0.49
  -9  -1  -1    6.43    0.46
   9   1  -1    7.26    0.50
  -9   1   1    7.24    0.49
   9  -1   1    6.79    0.45
   9   1  -1    7.87    0.46
  10   1   1    0.82    0.27
 -10  -1   1    0.41    0.27
  10  -1  -1    1.40    0.29
  10   1   1    1.02    0.26
  10  -1  -1    1.05    0.23
 -10   1  -1    0.71    0.27
 -10   1   1    1.09    0.29
 -10  -1  -1    0.73    0.27
  10   1  -1    1.02    0.25
  10   1  -1    0.97    0.28
  10  -1   1    0.87    0.25
  10  -1   1    1.02    0.29
  11  -1  -1    4.27    0.41
  11   1   1    3.11    0.43
 -11   1  -1    3.96    0.46
 -11  -1   1    3.85    0.48
  11   1   1    3.95    0.42
  11  -1  -1    3.73    0.45
  11   1  -1    3.87    0.48
 -11  -1  -1    2.81    0.43
  11   1  -1    3.60    0.40
  11  -1   1    4.26    0.48
 -11   1   1    3.25    0.45
  11  -1   1    3.60    0.41
   0   1  -2  251.79    6.42
   0   1  -2  241.78    6.33
   0   1   2  244.52    6.61
   0  -1  -2  241.29    6.35
   0   1   2  248.95    6.54
   0  -1  -2  245.61    6.37
   0   1  -2  245.97    6.61
   0   1   2  232.64    6.45
  -1  -1   2   39.47    1.10
  -1   1  -2   39.72    1.09
   1   1   2   39.64    1.12
   1   1   2   38.98    1.06
  -1   1  -2   37.68    1.06
  -1   1   2   39.06    1.07
  -1  -1  -2   39.98    1.06
   1  -1   2   40.27    1.07
   1   1  -2   38.46    1.06
   1   1  -2   38.50    1.12
   1  -1   2   39.51    1.08
  -1   1   2   38.73    1.10
  -1   1   2   37.38    1.10
   1   1  -2   39.86    1.05
   1   1  -2   38.87    1.04
  -1  -1  -2   39.12    1.05
   2   1   2  919.75   24.88
   2  -1  -2  958.43   24.91
  -2  -1   2  951.65   25.25
   2   1   2  962.51   25.41
  -2   1  -2  965.36   24.92
  -2   1  -2  988.89   25.22
   2   1   2  978.87   26.02
   2   1  -2  990.28   26.24
  -2  -1  -2  947.72   25.14
   2  -1   2  991.04   25.59
  -2   1   2  992.49   25.54
  -2  -1  -2 1000.00   25.50
   2  -1   2  963.87   25.18
   2   1  -2  967.81   25.64
   2   1  -2  966.46   25.12
   2  -1   2  980.49   26.23
   2   1  -2  910.43   25.17
   3  -1  -2   17.72    0.51
   3  -1  -2   17.19    0.49
   3  -1  -2   17.51    0.59
   3   1   2   17.63    0.54
   3   1   2   15.62    0.54
  -3   1  -2   17.75    0.53
  -3  -1   2   17.64    0.58
  -3   1  -2   15.64    0.56
   3  -1  -2   15.75    0.50
   3   1  -2   18.64    0.53
   3   1  -2   17.93    0.58
   3   1  -2   16.91    0.56
  -3   1   2   18.81    0.60
   3  -1   2   17.77    0.52
  -3  -1  -2   19.10    0.56
   3  -1   2   16.33    0.59
  -3  -1  -2   17.11    0.56
   3   1  -2   16.42    0.53
   3  -1   2   18.26    0.57
   4  -1  -2   18.41    0.53
   4  -1  -2   18.55    0.57
  -4   1  -2   17.47    0.63
   4   1   2   17.96    0.60
   4  -1  -2   18.64    0.55
   4   1   2   18.81    0.58
   4   1   2   17.90    0.63
   4  -1  -2   17.46    0.65
  -4   1  -2   18.16    0.58
  -4  -1   2   17.36    0.63
   4   1  -2   16.86    0.61
  -4   1   2   16.46    0.62
   4   1  -2   17.84    0.56
   4  -1   2   17.55    0.63
  -4  -1  -2   17.87    0.60
   4  -1   2   18.06    0.60
  -4  -1  -2   18.98    0.58
   4   1  -2   17.73    0.57
   4  -1   2   18.51    0.53
   5   1   2   81.43    2.19
   5  -1  -2   73.79    2.13
  -5   1  -2   76.59    2.23
   5  -1  -2   76.41    2.26
  -5   1  -2   83.57    2.14
   5   1   2   76.24    2.17
  -5  -1   2   76.42    2.24
   5   1   2   74.92    2.24
  -5   1   2   74.93    2.24
   5  -1   2   78.17    2.19
   5   1  -2   77.23    2.25
  -5  -1  -2   80.81    2.16
   5  -1   2   73.79    2.26
  -5  -1  -2   77.73    2.22
   5   1  -2   80.41    2.20
   5  -1   2   80.26    2.15
   5   1  -2   78.91    2.16
   6  -1  -2   19.62    0.77
  -6   1  -2   19.05    0.74
  -6  -1   2   19.12    0.75
   6   1   2   20.44    0.76
   6   1   2   19.89    0.72
   6  -1  -2   20.70    0.69
   6   1  -2   20.34    0.76
  -6   1   2   20.33    0.77
  -6  -1  -2   19.88    0.74
   6  -1   2   20.05    0.73
   6   1  -2   20.78    0.70
  -7   1  -2   26.07    0.94
   7   1   2   24.90    0.94
   7  -1  -2   24.72    0.96
  -7  -1   2   24.68    0.95
   7  -1  -2   25.01    0.86
   7   1   2   26.98    0.91
   7   1  -2   26.35    0.95
   7  -1   2   26.22    0.91
  -7  -1  -2   24.73    0.92
  -7   1   2   26.62    0.97
   7  -1   2   25.39    0.97
   7   1  -2   24.22    0.86
   8  -1  -2   11.35    0.52
  -8  -1   2    9.77    0.56
   8   1   2   11.13    0.54
   8  -1  -2   11.78    0.61
   8   1   2   11.09    0.58
  -8   1  -2   11.09    0.58
   8  -1   2   10.26    0.53
  -8   1   2   10.31    0.57
   8   1  -2   11.50    0.52
   8  -1   2   10.81    0.59
  -8  -1  -2   11.70    0.57
   8   1  -2   11.55    0.58
   9   1   2    2.25    0.29
   9  -1  -2    2.00    0.26
  -9  -1   2    1.74    0.28
  -9   1  -2    1.82    0.31
   9   1   2    2.14    0.31
   9  -1  -2    2.05    0.32
   9  -1   2    2.05    0.28
   9   1  -2    2.64    0.32
   9  -1   2    2.40    0.33
  -9  -1  -2    2.31    0.30
  -9   1   2    1.97    0.32
   9   1  -2    2.31    0.27
 -10   1  -2    5.32    0.50
 -10  -1   2    6.36    0.53
  10   1   2    5.50    0.50
  10  -1  -2    5.66    0.42
  10   1   2    5.44    0.45
  10  -1  -2    5.47    0.50
  10   1  -2    6.57    0.51
 -10  -1  -2    5.73    0.49
  10  -1   2    5.52    0.51
  10   1  -2    6.05    0.45
  10  -1   2    6.24    0.49
 -10   1   2    5.64    0.50
  11   1   2    6.23    0.57
 -11   1  -2    6.96    0.59
  11  -1  -2    6.58    0.60
  11  -1  -2    5.93    0.48
 -11  -1   2    6.58    0.59
  11  -1   2    7.04    0.61
  11   1  -2    6.41    0.51
 -11   1   2    6.14    0.59
  11   1  -2    7.52    0.60
 -11  -1  -2    5.53    0.55
   0   1  -3  133.07    3.42
   0  -1   3  138.87    3.50
   0   1   3  129.11    3.51
   0  -1  -3  128.98    3.42
   0   1  -3  133.47    3.48
   0   1   3  124.64    3.58
   0   1  -3  128.63    3.60
  -1   1  -3  393.21   10.23
   1   1   3  385.61   10.30
  -1   1  -3  387.17   10.10
   1   1   3  394.43   10.54
  -1   1   3  393.80   10.15
   1   1  -3  399.50   10.16
  -1  -1  -3  379.12   10.19
  -1   1   3  374.74   10.46
   1  -1   3  389.03   10.46
   1   1  -3  370.15   10.22
   1   1  -3  378.27   10.47
  -1  -1  -3  382.80   10.02
   1  -1   3  411.04   10.03
  -1   1   3  398.31   10.23
   1   1  -3  376.63   10.03
   1   1  -3  381.62   10.02
   1  -1   3  398.92   10.21
   2   1   3   16.96    0.55
  -2   1  -3   15.73    0.53
   2   1   3   16.65    0.51
  -2   1  -3   16.84    0.51
  -2  -1   3   16.56    0.55
   2   1   3   16.45    0.53
   2   1  -3   16.20    0.55
   2   1  -3   16.37    0.49
  -2   1   3   17.02    0.52
   2  -1   3   17.42    0.54
  -2  -1  -3   17.64    0.51
  -2   1   3   17.21    0.54
  -2   1   3   15.98    0.55
   2   1  -3   17.55    0.49
  -2  -1  -3   17.41    0.52
   2   1  -3   16.29    0.52
   2  -1   3   17.32    0.53
   2  -1   3   16.78    0.53
   3   1   3  108.20    2.98
  -3   1  -3  110.77    2.87
   3  -1  -3  102.47    2.96
  -3   1  -3  106.90    2.93
   3  -1  -3  105.66    2.82
  -3  -1   3  106.75    2.95
   3  -1  -3  109.60    2.81
   3   1   3  108.52    2.95
   3   1   3  106.19    2.88
  -3  -1  -3  109.46    2.93
  -3   1   3  106.86    2.96
   3   1  -3  108.62    2.85
   3   1  -3  108.56    2.95
   3   1  -3  106.15    2.86
  -3  -1  -3  106.92    2.89
   3  -1   3  109.93    2.98
   3   1  -3  108.22    3.01
   3  -1   3  111.53    2.92
   3  -1   3  108.40    2.98
   4   1   3   11.24    0.48
   4   1   3   12.23    0.46
   4  -1  -3   11.57    0.41
  -4  -1   3   12.73    0.50
   4  -1  -3   14.69    0.40
  -4   1  -3   12.86    0.45
  -4   1  -3   11.72    0.48
   4   1   3   12.38    0.44
   4  -1  -3   11.85    0.50
   4  -1  -3   12.87    0.41
  -4  -1  -3   11.40    0.42
   4   1  -3   11.96    0.42
  -4   1   3   10.73    0.46
   4  -1   3   11.52    0.47
   4  -1   3   12.04    0.45
  -4  -1  -3   12.28    0.44
   4   1  -3   11.49    0.45
   4   1  -3   11.54    0.40
   4  -1   3   11.87    0.38
   4   1  -3   11.86    0.39
   5   1   3   26.09    0.84
   5  -1  -3   26.30    0.77
   5  -1  -3   25.77    0.75
  -5   1  -3   25.94    0.81
   5   1   3   25.18    0.88
  -5  -1   3   25.40    0.89
  -5   1  -3   24.85    0.87
   5  -1  -3   25.61    0.90
   5   1   3   26.45    0.81
   5  -1  -3   24.94    0.78
   5  -1   3   24.71    0.88
   5  -1   3   24.57    0.75
  -5  -1  -3   25.71    0.84
   5   1  -3   25.10    0.79
   5  -1   3   26.30    0.85
   5   1  -3   26.71    0.81
  -5  -1  -3   26.27    0.81
   5   1  -3   23.91    0.85
  -5   1   3   26.61    0.88
  -6  -1   3    8.49    0.44
   6   1   3    8.43    0.35
   6  -1  -3    8.68    0.38
  -6   1  -3    8.71    0.43
   6   1   3    9.23    0.42
   6   1   3    7.97    0.43
   6  -1  -3    8.16    0.45
   6   1  -3    8.96    0.38
   6  -1   3    8.04    0.43
  -6   1   3    7.45    0.42
  -6  -1  -3    8.83    0.42
   6  -1   3    8.95    0.42
   6   1  -3    8.15    0.43
   7   1   3    4.57    0.34
  -7   1  -3    5.08    0.35
  -7  -1   3    4.58    0.35
   7  -1  -3    4.47    0.29
   7  -1  -3    4.50    0.36
   7   1   3    4.90    0.33
   7  -1   3    4.02    0.32
  -7  -1  -3    4.76    0.33
  -7   1   3    4.52    0.34
   7   1  -3    4.82    0.30
   7   1  -3    4.75    0.34
   7  -1   3    4.33    0.32
   8  -1  -3   13.18    0.58
   8   1   3   13.50    0.62
  -8   1  -3   13.64    0.66
   8  -1  -3   13.79    0.68
  -8  -1   3   13.61    0.67
   8   1   3   13.98    0.67
   8   1  -3   13.94    0.66
   8  -1   3   12.43    0.65
   8  -1   3   13.10    0.61
  -8   1   3   13.75    0.67
   8   1  -3   13.14    0.57
  -8  -1  -3   13.93    0.64
   9   1   3   10.95    0.59
   9  -1  -3   11.00    0.54
   9   1   3    9.43    0.59
   9  -1  -3   10.82    0.63
  -9   1  -3   10.99    0.62
  -9  -1   3   11.65    0.65
   9  -1   3   10.53    0.58
   9   1  -3   11.26    0.62
   9  -1   3   11.56    0.65
  -9  -1  -3   11.69    0.61
  -9   1   3   11.21    0.64
   9   1  -3   11.56    0.57
  10  -1  -3    6.15    0.52
 -10  -1   3    6.29    0.53
  10  -1  -3    5.47    0.42
 -10   1  -3    4.39    0.45
  10   1   3    5.14    0.48
 -10  -1  -3    5.88    0.47
  10   1  -3    5.35    0.49
 -10   1   3    6.10    0.54
  10   1  -3    5.23    0.41
  10  -1   3    5.96    0.51
  11   1   3    9.72    0.66
 -11  -1   3    7.67    0.64
 -11   1  -3    8.04    0.62
  11  -1  -3    8.53    0.55
  11  -1  -3    8.45    0.65
 -11  -1  -3    8.93    0.62
 -11   1   3    7.98    0.62
  11   1  -3    8.57    0.62
  11   1  -3    9.80    0.59
  11  -1   3    8.06    0.63
   0   1  -4  178.48    4.71
   0  -1   4  185.51    4.80
   0  -1  -4  177.51    4.70
   0  -1  -4  183.26    4.77
   0  -1   4  181.67    4.95
   0   1   4  178.86    4.84
   0   1   4  181.29    4.95
   0  -1  -4  176.73    4.71
   0   1  -4  180.86    4.72
   0   1  -4  186.47    4.80
  -1   1  -4   57.57    1.57
  -1   1  -4   57.75    1.61
   1   1   4   60.40    1.64
  -1  -1   4   60.27    1.58
   1   1   4   55.50    1.66
   1   1  -4   57.83    1.51
  -1   1   4   53.20    1.59
  -1   1   4   57.72    1.62
   1   1  -4   55.29    1.64
   1  -1   4   58.76    1.56
  -1  -1  -4   56.63    1.53
   1   1  -4   57.15    1.51
   1   1  -4   57.85    1.59
  -1   1   4   54.86    1.56
  -1  -1  -4   56.81    1.53
   1  -1   4   59.79    1.62
  -2  -1   4   28.63    0.87
  -2   1  -4   27.97    0.82
   2   1   4   27.92    0.86
   2   1   4   28.52    0.86
  -2   1  -4   28.74    0.85
   2   1   4   27.29    0.81
   2   1  -4   26.81    0.80
  -2  -1  -4   26.84    0.78
   2   1  -4   27.12    0.75
   2   1  -4   27.87    0.85
   2  -1   4   26.37    0.80
  -2   1   4   28.44    0.83
  -2  -1  -4   27.75    0.79
   2  -1   4   27.30    0.82
  -2   1   4   26.53    0.83
   2  -1   4   27.92    0.83
  -2   1   4   27.97    0.83
   2   1  -4   27.49    0.75
   3   1   4  164.81    4.30
   3  -1  -4  162.66    4.24
  -3   1  -4  164.33    4.38
   3  -1  -4  159.13    4.42
  -3  -1   4  156.56    4.40
   3  -1  -4  171.22    4.24
  -3   1  -4  157.24    4.29
   3   1   4  159.15    4.40
   3   1   4  167.68    4.48
   3   1  -4  160.35    4.41
  -3   1   4  171.47    4.62
  -3   1   4  163.86    4.55
  -3  -1  -4  169.66    4.51
   3   1  -4  166.98    4.66
   3   1  -4  171.15    4.41
   3  -1   4  172.72    4.63
   3  -1   4  171.52    4.49
   3  -1   4  166.21    4.56
  -3  -1  -4  173.50    4.46
   3   1  -4  171.79    4.55
   4   1   4    2.61    0.21
   4  -1  -4    2.84    0.17
  -4   1  -4    3.04    0.19
   4   1   4    2.82    0.18
   4  -1  -4    2.79    0.14
  -4  -1   4    2.75    0.22
   4  -1  -4    3.12    0.23
  -4   1  -4    3.14    0.22
   4   1   4    2.68    0.20
   4  -1  -4    2.82    0.15
   4  -1   4    2.79    0.21
   4   1  -4    2.98    0.21
   4   1  -4    3.01    0.17
  -4  -1  -4    2.95    0.19
   4  -1   4    3.01    0.22
   4   1  -4    3.11    0.16
   4   1  -4    3.16    0.20
  -4   1   4    2.92    0.21
   4  -1   4    3.23    0.17
  -4  -1  -4    2.68    0.18
  -5   1  -4   18.99    0.62
   5  -1  -4   16.40    0.56
   5   1   4   17.59    0.67
   5  -1  -4   17.74    0.68
   5   1   4   18.12    0.60
  -5  -1   4   16.97    0.67
   5  -1  -4   18.14    0.57
  -5   1  -4   16.37    0.64
   5  -1  -4   16.76    0.54
   5   1   4   18.09    0.64
  -5  -1  -4   18.37    0.66
   5   1  -4   19.64    0.64
   5  -1   4   18.62    0.70
  -5   1   4   18.82    0.70
   5   1  -4   18.44    0.61
   5  -1   4   18.66    0.66
  -5  -1  -4   18.76    0.64
   5   1  -4   17.44    0.67
   5  -1   4   18.15    0.59
   6  -1  -4    4.94    0.27
   6   1   4    5.26    0.31
  -6  -1   4    4.95    0.33
   6   1   4    5.84    0.28
   6   1   4    4.99    0.34
  -6   1  -4    4.87    0.33
   6  -1  -4    5.88    0.37
   6   1  -4    5.25    0.28
  -6   1   4    4.77    0.34
  -6  -1  -4    4.82    0.31
   6  -1   4    4.90    0.33
   6   1  -4    5.32    0.34
   6  -1   4    5.42    0.33
   7  -1  -4    2.96    0.23
   7   1   4    2.49    0.26
  -7   1  -4    2.57    0.26
   7  -1  -4    3.03    0.30
  -7  -1   4    2.34    0.28
   7   1   4    2.57    0.28
   7   1  -4    2.60    0.23
  -7  -1  -4    2.58    0.27
   7  -1   4    2.73    0.29
  -7   1   4    2.17    0.27
   7   1  -4    2.63    0.27
   7  -1   4    2.98    0.26
   8  -1  -4    2.30    0.30
   8   1   4    1.83    0.25
  -8   1  -4    2.06    0.27
  -8  -1   4    2.21    0.30
   8  -1  -4    2.24    0.23
   8   1   4    2.65    0.30
   8  -1   4    2.31    0.28
   8   1  -4    2.31    0.28
   8   1  -4    2.39    0.23
  -8   1   4    2.36    0.29
   8  -1   4    1.83    0.28
  -8  -1  -4    1.93    0.26
   9  -1  -4    5.87    0.38
  -9   1  -4    5.40    0.45
   9  -1  -4    5.44    0.47
   9   1   4    5.47    0.45
  -9  -1   4    5.58    0.48
   9   1  -4    6.01    0.39
   9   1  -4    6.28    0.46
   9  -1   4    5.91    0.49
  -9   1   4    5.55    0.47
  -9  -1  -4    6.05    0.46
  10  -1  -4   -0.05    0.18
  10   1   4   -0.07    0.22
 -10   1  -4   -0.11    0.22
 -10  -1   4    0.08    0.25
  10  -1  -4   -0.46    0.21
 -10   1   4    0.54    0.26
  10  -1   4    0.09    0.20
  10   1  -4   -0.01    0.20
  10   1  -4    0.02    0.23
 -10  -1  -4   -0.03    0.21
  11   1   4    1.91    0.38
  11  -1  -4    1.52    0.31
 -11  -1   4    1.21    0.37
 -11   1  -4    1.25    0.35
  11  -1  -4    1.74    0.37
  11   1  -4    1.66    0.31
  11   1  -4    1.33    0.37
 -11   1   4    1.24    0.37
  11  -1   4    1.47    0.36
 -11  -1  -4    1.31    0.34
   0  -1  -5    0.07    0.04
   0  -1  -5    0.15    0.04
   0  -1  -5    0.19    0.05
   0  -1   5    0.14    0.05
   0   1   5    0.14    0.07
   0  -1   5    0.17    0.06
   0   1  -5    0.23    0.07
   0   1   5    0.19    0.07
   0   1  -5    0.26    0.06
   0   1  -5    0.14    0.05
  -1   1  -5  154.13    4.17
  -1  -1   5  160.46    4.15
   1   1   5  156.15    4.30
   1   1   5  157.30    4.21
  -1   1  -5  151.10    4.09
   1   1  -5  157.31    4.12
  -1  -1  -5  149.41    4.14
   1   1  -5  162.07    4.39
   1  -1   5  160.03    4.36
  -1   1   5  160.76    4.22
   1   1  -5  159.32    4.24
   1   1  -5  160.54    4.13
  -1  -1  -5  158.63    4.19
   1  -1   5  163.17    4.23
  -1   1   5  154.85    4.36
  -1   1   5  155.57    4.26
  -2  -1   5   23.46    0.75
   2   1   5   22.89    0.74
   2   1   5   23.23    0.74
  -2   1  -5   22.79    0.73
  -2   1  -5   23.06    0.70
  -2  -1  -5   22.35    0.70
   2   1  -5   23.99    0.71
  -2   1   5   22.83    0.74
   2   1  -5   22.67    0.76
   2   1  -5   24.13    0.66
   2  -1   5   23.54    0.74
   2  -1   5   23.92    0.72
  -2   1   5   23.34    0.74
   2   1  -5   23.07    0.65
  -2   1   5   23.40    0.74
  -2  -1  -5   24.34    0.69
   2  -1   5   23.43    0.72
   3   1   5  169.72    4.61
  -3   1  -5  164.03    4.57
  -3   1  -5  172.70    4.49
   3   1   5  176.99    4.50
   3   1   5  169.34    4.68
  -3  -1   5  165.42    4.60
   3   1  -5  159.48    4.38
  -3   1   5  168.01    4.55
   3  -1   5  174.76    4.46
   3   1  -5  167.05    4.52
   3  -1   5  165.41    4.54
   3  -1   5  172.89    4.62
   3   1  -5  177.11    4.38
  -3   1   5  169.87    4.54
  -3  -1  -5  157.99    4.43
  -3   1   5  169.83    4.61
  -3  -1  -5  169.68    4.48
   3   1  -5  162.05    4.64
   4   1   5   13.13    0.49
  -4   1  -5   12.59    0.51
   4  -1  -5   13.40    0.40
   4   1   5   14.01    0.53
  -4  -1   5   12.93    0.54
   4  -1  -5   13.29    0.54
   4  -1  -5   13.32    0.41
   4   1   5   13.96    0.50
  -4   1  -5   13.54    0.49
   4  -1  -5   14.00    0.48
   4  -1   5   13.21    0.52
   4   1  -5   13.42    0.51
  -4  -1  -5   12.85    0.48
   4  -1   5   13.29    0.51
   4   1  -5   14.00    0.51
   4  -1   5   13.81    0.47
   4   1  -5   12.68    0.43
  -4   1   5   13.20    0.53
  -4  -1  -5   14.72    0.50
   4   1  -5   13.04    0.42
   5   1   5   17.49    0.68
   5   1   5   18.89    0.64
  -5   1  -5   18.31    0.64
   5  -1  -5   18.76    0.61
   5  -1  -5   18.59    0.71
  -5  -1   5   17.05    0.70
   5  -1  -5   18.33    0.56
   5  -1  -5   18.53    0.57
   5   1   5   17.82    0.65
  -5   1  -5   17.75    0.68
   5   1  -5   19.88    0.71
   5  -1   5   20.25    0.71
  -5  -1  -5   19.41    0.67
   5   1  -5   19.98    0.68
   5  -1   5   17.98    0.71
  -5  -1  -5   18.74    0.67
   5  -1   5   19.68    0.64
  -5   1   5   19.66    0.74
   5   1  -5   19.29    0.62
   6  -1  -5   26.91    0.98
   6  -1  -5   26.90    0.83
  -6  -1   5   26.04    0.97
   6   1   5   26.87    0.87
   6   1   5   24.86    0.94
  -6   1  -5   26.29    0.94
   6   1   5   27.39    0.92
   6  -1   5   27.30    0.97
   6   1  -5   27.24    0.85
  -6  -1  -5   26.05    0.91
   6   1  -5   26.55    0.94
   6  -1   5   27.10    0.93
  -6   1   5   25.72    0.97
  -7   1  -5    2.12    0.25
   7   1   5    1.48    0.23
   7  -1  -5    1.63    0.18
  -7  -1   5    1.10    0.23
   7  -1  -5    1.34    0.25
   7   1   5    1.68    0.22
   7   1  -5    1.52    0.17
   7  -1   5    1.46    0.24
   7  -1   5    1.24    0.22
  -7   1   5    1.02    0.22
   7   1  -5    1.74    0.24
  -7  -1  -5    1.88    0.22
   8  -1  -5    8.41    0.42
   8   1   5    7.93    0.50
  -8   1  -5    8.47    0.50
   8  -1  -5    8.12    0.52
  -8  -1   5    7.76    0.50
  -8  -1  -5    8.45    0.49
   8   1  -5    8.66    0.50
   8  -1   5    8.39    0.51
   8   1  -5    8.30    0.42
  -8   1   5    7.70    0.51
  -9  -1   5    2.86    0.38
   9  -1  -5    3.13    0.37
   9  -1  -5    2.73    0.28
   9   1   5    2.95    0.36
  -9   1  -5    2.86    0.34
  -9   1   5    2.58    0.35
   9   1  -5    2.46    0.34
   9   1  -5    2.37    0.27
  -9  -1  -5    2.86    0.35
   9  -1   5    2.15    0.32
  10   1   5    7.55    0.55
 -10  -1   5    8.11    0.60
  10  -1  -5    7.15    0.56
  10  -1  -5    7.42    0.47
 -10   1  -5    6.81    0.52
  10  -1   5    7.32    0.56
 -10  -1  -5    6.84    0.54
  10   1  -5    7.30    0.47
 -10   1   5    7.49    0.57
  10   1  -5    7.12    0.53
  11   1   5    0.61    0.32
  11  -1  -5    0.16    0.23
 -11  -1   5    0.01    0.29
 -11   1  -5    0.01    0.29
  11  -1  -5   -0.10    0.30
 -11   1   5    0.05    0.31
  11  -1   5    0.41    0.29
  11   1  -5    0.01    0.33
  11   1  -5    0.27    0.25
   0   1  -6    2.00    0.13
   0   1  -6    1.64    0.11
   0   1  -6    2.04    0.15
   0  -1  -6    1.78    0.11
   0  -1   6    1.82    0.12
   0  -1   6    1.63    0.15
   0   1   6    1.41    0.14
   0  -1  -6    1.82    0.12
   0  -1  -6    1.95    0.10
   0   1   6    1.94    0.15
  -1   1  -6  123.78    3.38
   1   1   6  132.09    3.50
  -1  -1   6  134.69    3.43
  -1  -1   6  125.80    3.58
   1   1   6  125.52    3.58
  -1   1  -6  126.03    3.46
   1  -1   6  135.13    3.46
  -1  -1  -6  121.84    3.38
  -1   1   6  131.40    3.45
  -1  -1  -6  126.23    3.41
   1   1  -6  130.84    3.36
  -1  -1  -6  128.96    3.39
   1   1  -6  125.29    3.47
  -1   1   6  124.54    3.57
   1   1  -6  128.90    3.35
   1  -1   6  128.67    3.58
  -2  -1   6   93.28    2.43
   2   1   6   88.06    2.48
  -2   1  -6   90.85    2.46
  -2  -1   6   87.75    2.49
  -2   1  -6   85.94    2.40
   2   1   6   87.34    2.53
   2  -1   6   93.05    2.59
   2   1  -6   89.73    2.62
   2   1  -6   93.54    2.41
  -2  -1  -6   90.10    2.47
  -2   1   6   92.88    2.55
   2  -1   6   90.40    2.47
  -2   1   6   92.37    2.53
   2  -1   6   92.60    2.52
  -2   1   6   92.86    2.59
   2   1  -6   88.35    2.40
  -2  -1  -6   90.70    2.46
  -3   1  -6   15.52    0.54
   3   1   6   15.41    0.56
   3   1   6   16.03    0.58
   3   1   6   15.75    0.54
  -3   1  -6   15.74    0.56
  -3  -1   6   15.12    0.59
  -3   1   6   14.49    0.56
  -3   1   6   15.48    0.54
   3   1  -6   15.28    0.53
   3  -1   6   15.80    0.55
   3  -1   6   15.74    0.55
   3   1  -6   16.20    0.58
  -3  -1  -6   16.27    0.52
  -3   1   6   15.36    0.57
   3  -1   6   14.97    0.54
   3   1  -6   14.92    0.46
  -3  -1  -6   15.01    0.53
   3   1  -6   15.84    0.46
   4   1   6   39.94    1.21
  -4   1  -6   38.87    1.16
   4  -1  -6   38.54    1.05
   4   1   6   38.85    1.22
   4  -1  -6   39.35    1.04
  -4   1  -6   37.92    1.20
  -4  -1   6   36.91    1.23
   4  -1  -6   37.84    1.23
   4   1   6   40.78    1.18
  -4   1   6   39.47    1.25
   4   1  -6   41.70    1.11
   4  -1   6   41.30    1.22
   4   1  -6   39.81    1.21
   4   1  -6   39.75    1.12
   4  -1   6   40.02    1.24
  -4  -1  -6   40.33    1.19
   4  -1   6   39.96    1.21
  -4  -1  -6   40.23    1.19
   4   1  -6   37.02    1.24
   5   1   6   12.47    0.55
   5   1   6   12.92    0.52
   5  -1  -6   13.17    0.43
  -5  -1   6   12.68    0.58
  -5   1  -6   13.77    0.52
  -5   1  -6   12.61    0.54
   5  -1  -6   14.28    0.51
   5  -1  -6   12.93    0.42
   5   1   6   14.05    0.52
   5  -1  -6   12.74    0.57
   5  -1   6   14.16    0.56
   5   1  -6   13.34    0.46
  -5  -1  -6   12.76    0.51
   5   1  -6   14.42    0.54
   5  -1   6   13.47    0.49
  -5   1   6   12.71    0.56
  -5  -1  -6   13.60    0.52
   5   1  -6   13.68    0.55
   5  -1   6   12.40    0.55
   6   1   6   27.11    1.02
   6  -1  -6   29.38    0.88
   6   1   6   29.99    0.95
   6  -1  -6   29.07    1.04
  -6   1  -6   29.01    1.01
  -6  -1   6   27.13    1.03
   6   1  -6   31.61    1.04
  -6  -1  -6   30.10    1.00
  -6   1   6   29.68    1.07
   6  -1   6   27.42    1.03
   6   1  -6   30.29    0.92
   6  -1   6   28.94    1.01
   7  -1  -6   11.91    0.47
  -7   1  -6   10.66    0.55
  -7  -1   6   11.59    0.60
   7  -1  -6   11.94    0.60
   7   1   6   10.90    0.56
  -7  -1  -6   12.45    0.56
  -7   1   6   12.37    0.62
   7  -1   6   12.83    0.62
   7   1  -6   12.15    0.50
   7   1  -6   12.51    0.60
  -8  -1   6   13.81    0.71
   8   1   6   13.95    0.69
   8  -1  -6   14.06    0.57
  -8   1  -6   12.83    0.65
   8  -1  -6   14.92    0.72
   8  -1   6   14.65    0.72
  -8  -1  -6   14.90    0.68
   8   1  -6   15.20    0.71
   8   1  -6   15.27    0.61
  -8   1   6   14.62    0.73
   9   1   6    2.72    0.35
  -9   1  -6    2.27    0.34
   9  -1  -6    2.58    0.27
   9  -1  -6    3.01    0.38
  -9  -1   6    2.51    0.35
   9   1  -6    2.78    0.37
   9   1  -6    2.96    0.28
  -9   1   6    2.78    0.37
   9  -1   6    3.29    0.38
  -9  -1  -6    3.27    0.35
 -10  -1   6    5.29    0.53
  10   1   6    6.37    0.54
  10  -1  -6    5.90    0.41
 -10   1  -6    6.67    0.52
  10  -1  -6    5.30    0.54
  10   1  -6    5.43    0.40
  10  -1   6    6.85    0.54
 -10   1   6    4.77    0.49
  10   1  -6    5.92    0.51
  11  -1  -6    4.58    0.54
 -11   1  -6    4.46    0.52
  11   1  -6    5.01    0.42
   0   1  -7   59.66    1.73
   0  -1  -7   60.88    1.64
   0  -1  -7   61.60    1.65
   0   1  -7   60.72    1.67
   0   1   7   57.97    1.80
   0  -1   7   61.74    1.70
   0   1   7   62.64    1.76
   0   1  -7   61.76    1.66
   0  -1   7   63.14    1.81
   0  -1  -7   61.79    1.69
   1   1   7    0.66    0.12
   1   1   7    0.81    0.12
   1  -1  -7    0.81    0.10
  -1   1  -7    0.64    0.10
   1  -1  -7    0.67    0.06
  -1   1  -7    0.66    0.09
   1  -1  -7    0.57    0.05
  -1  -1   7    0.67    0.09
  -1  -1   7    0.79    0.12
  -1   1   7    1.51    0.15
   1   1  -7    0.85    0.09
   1  -1   7    0.85    0.11
  -1  -1  -7    0.71    0.09
  -1  -1  -7    0.74    0.09
  -1   1   7    1.02    0.13
   1   1  -7    0.88    0.12
   1   1  -7    0.86    0.08
   1  -1   7    0.69    0.12
  -1  -1  -7    0.79    0.10
   2   1   7   38.45    1.24
  -2   1  -7   40.85    1.18
  -2  -1   7   43.73    1.19
  -2   1  -7   40.80    1.22
   2   1   7   41.28    1.27
   2  -1   7   44.31    1.31
  -2   1   7   42.63    1.31
   2   1  -7   42.89    1.16
   2   1  -7   43.94    1.17
  -2  -1  -7   43.46    1.22
   2  -1   7   44.32    1.26
  -2   1   7   41.47    1.28
   2   1  -7   41.58    1.28
  -2   1   7   41.97    1.27
  -2  -1  -7   42.29    1.23
   2   1  -7   43.21    1.34
   3   1   7    6.03    0.29
   3   1   7    5.81    0.30
  -3  -1   7    5.64    0.32
  -3   1  -7    5.60    0.28
   3   1   7    5.42    0.31
  -3   1  -7    5.94    0.30
   3   1  -7    5.36    0.20
   3   1  -7    5.59    0.27
  -3   1   7    4.83    0.29
   3   1  -7    6.17    0.32
  -3  -1  -7    5.75    0.26
   3  -1   7    5.69    0.29
  -3  -1  -7    5.34    0.27
   3  -1   7    4.90    0.27
  -3   1   7    6.03    0.31
   3  -1   7    5.78    0.29
  -3   1   7    5.77    0.28
   3   1  -7    5.44    0.21
  -4  -1   7    0.13    0.10
  -4   1  -7    0.51    0.12
   4   1   7    0.37    0.12
   4   1   7    0.46    0.11
   4  -1  -7    0.51    0.13
  -4   1  -7    0.51    0.11
   4  -1   7    0.45    0.12
   4   1  -7    0.48    0.12
   4   1  -7    0.53    0.13
  -4   1   7    0.46    0.14
   4   1  -7    0.50    0.08
   4   1  -7    0.52    0.08
  -4   1   7    0.40    0.10
  -4  -1  -7    0.47    0.11
   4  -1   7    0.44    0.12
   4  -1   7    0.36    0.11
  -4  -1  -7    0.48    0.11
   5  -1  -7   29.28    0.81
   5  -1  -7   28.86    0.83
  -5   1  -7   28.89    0.95
   5  -1  -7   29.96    0.95
   5  -1  -7   27.91    1.01
   5   1   7   29.52    0.96
  -5   1  -7   29.24    0.98
   5   1   7   27.10    0.99
  -5  -1   7   29.57    1.04
  -5   1   7   29.92    1.04
  -5  -1  -7   30.75    0.97
  -5  -1  -7   29.83    0.97
   5   1  -7   31.04    0.89
   5   1  -7   29.77    1.00
   5   1  -7   29.72    1.01
   5  -1   7   29.43    0.96
   5  -1   7   29.35    1.02
   6   1   7    9.04    0.49
  -6   1  -7    9.92    0.49
   6  -1  -7    9.71    0.51
   6   1   7    9.72    0.44
  -6  -1   7    9.59    0.52
   6  -1  -7    9.44    0.37
  -6  -1  -7    9.75    0.45
   6  -1   7    9.18    0.48
   6   1  -7    9.05    0.37
   6   1  -7    9.29    0.47
  -6   1   7    8.47    0.48
  -7  -1   7    4.01    0.38
  -7   1  -7    4.50    0.37
   7  -1  -7    4.54    0.39
   7  -1  -7    3.98    0.26
   7   1   7    4.48    0.35
   7  -1   7    4.13    0.36
  -7   1   7    3.88    0.35
  -7  -1  -7    3.82    0.30
   7   1  -7    4.59    0.28
   7   1  -7    4.30    0.35
  -8   1  -7    7.14    0.47
   8  -1  -7    7.75    0.53
  -8  -1   7    8.15    0.53
   8  -1  -7    7.41    0.38
   8   1   7    6.51    0.47
  -8   1   7    7.09    0.51
   8   1  -7    7.87    0.50
   8   1  -7    7.69    0.40
   8  -1   7    7.76    0.50
  -9   1  -7    6.97    0.49
   9   1   7    7.63    0.53
   9  -1  -7    7.28    0.53
  -9  -1   7    6.99    0.55
   9  -1  -7    7.79    0.43
   9   1  -7    7.22    0.42
   9  -1   7    7.47    0.54
   9   1  -7    8.50    0.56
  -9   1   7    6.67    0.52
  10  -1  -7    3.78    0.35
 -10  -1   7    4.10    0.47
  10  -1  -7    4.47    0.50
  10   1   7    3.88    0.44
 -10   1  -7    3.99    0.43
  10   1  -7    4.09    0.36
  10  -1   7    5.15    0.51
 -10   1   7    2.84    0.42
  11  -1  -7    0.35    0.31
   0   1   8  243.31    6.47
   0   1   8  233.78    6.63
   0   1  -8  231.08    6.27
   0  -1   8  245.06    6.41
   0   1  -8  238.32    6.41
   0  -1   8  236.61    6.63
   0   1  -8  244.99    6.29
   0  -1  -8  245.18    6.37
   0  -1  -8  241.16    6.26
   0  -1  -8  244.74    6.27
   1  -1  -8    5.20    0.18
   1  -1  -8    4.78    0.17
   1   1   8    4.92    0.28
   1   1   8    4.96    0.28
  -1   1  -8    4.48    0.22
  -1  -1   8    5.24    0.29
  -1   1  -8    4.79    0.26
  -1  -1   8    4.87    0.23
   1  -1  -8    5.11    0.24
  -1   1   8    5.04    0.29
   1  -1   8    5.06    0.28
  -1   1   8    5.32    0.28
   1   1  -8    5.57    0.23
  -1  -1  -8    5.23    0.24
   1   1  -8    5.18    0.28
   1  -1   8    5.59    0.26
   1   1  -8    5.39    0.21
  -1  -1  -8    5.52    0.25
  -1  -1  -8    5.06    0.23
  -2   1  -8    0.64    0.12
   2   1   8    0.86    0.14
  -2   1  -8    0.74    0.11
   2   1   8    0.88    0.14
  -2  -1   8    0.88    0.11
  -2  -1  -8    0.82    0.11
   2  -1   8    0.92    0.13
   2   1  -8    1.03    0.17
  -2   1   8    0.95    0.14
  -2   1   8    1.17    0.15
  -2  -1  -8    0.93    0.11
   2   1  -8    0.94    0.09
  -2   1   8    0.86    0.13
   2  -1   8    0.82    0.13
   2   1  -8    0.76    0.07
   2   1  -8    0.68    0.12
   3   1   8   27.25    0.94
   3   1   8   29.36    0.96
  -3  -1   8   28.08    0.97
  -3   1  -8   29.16    0.93
  -3   1  -8   28.13    0.89
   3  -1   8   28.77    0.92
  -3   1   8   28.87    0.95
  -3  -1  -8   27.81    0.89
  -3   1   8   29.75    0.95
   3   1  -8   29.01    0.99
   3   1  -8   29.49    0.81
  -3   1   8   27.28    0.94
   3   1  -8   27.52    0.80
   3  -1   8   28.89    0.95
  -3  -1  -8   28.45    0.88
   3   1  -8   29.24    0.90
  -4   1  -8    9.09    0.42
   4   1   8    9.05    0.42
  -4   1  -8    9.49    0.41
  -4  -1   8    9.28    0.47
   4   1   8    9.04    0.44
  -4  -1  -8   10.08    0.42
   4  -1   8   10.59    0.44
   4   1  -8    9.42    0.42
  -4   1   8    9.46    0.46
  -4  -1  -8    9.81    0.41
  -4   1   8    9.78    0.43
   4   1  -8    9.93    0.34
   4  -1   8    9.06    0.43
   4   1  -8    9.57    0.46
   4   1  -8   10.51    0.34
  -5   1  -8    8.88    0.42
   5  -1  -8    9.02    0.47
   5  -1  -8    9.27    0.43
   5  -1  -8    8.96    0.31
   5   1   8    8.72    0.46
  -5   1  -8    9.43    0.45
  -5  -1   8    9.51    0.49
   5   1   8    8.89    0.42
   5  -1  -8    8.85    0.29
  -5   1   8    9.63    0.49
   5  -1   8    9.67    0.47
   5   1  -8   10.14    0.46
  -5  -1  -8    9.90    0.44
   5   1  -8    9.85    0.36
   5   1  -8    9.32    0.45
   5  -1   8    9.23    0.42
  -5  -1  -8    9.29    0.43
   6   1   8   14.27    0.64
  -6   1  -8   13.28    0.60
  -6  -1   8   13.41    0.66
   6  -1  -8   14.35    0.65
   6   1   8   13.80    0.58
   6  -1  -8   14.67    0.48
   6  -1   8   13.95    0.61
  -6   1   8   12.90    0.63
  -6  -1  -8   13.69    0.57
   6   1  -8   12.50    0.58
   6   1  -8   13.28    0.48
  -6  -1  -8   13.92    0.58
  -7  -1   8   16.03    0.77
   7  -1  -8   17.06    0.59
  -7   1  -8   15.98    0.72
   7  -1  -8   17.50    0.77
   7  -1   8   16.31    0.73
   7   1  -8   16.29    0.71
  -7   1   8   16.15    0.75
   7   1  -8   16.08    0.59
  -8   1  -8   11.82    0.63
   8  -1  -8   13.66    0.70
  -8  -1   8   12.72    0.70
   8   1   8   12.32    0.67
   8  -1  -8   12.81    0.52
   8   1  -8   13.11    0.54
  -8   1   8   12.28    0.68
   8  -1   8   12.40    0.65
  -9   1  -8    0.93    0.28
   9  -1  -8    1.07    0.29
  -9  -1   8    0.75    0.28
   9  -1  -8    0.91    0.19
   9   1   8    0.70    0.26
   9  -1   8    0.76    0.28
   9   1  -8    0.85    0.19
  -9   1   8    0.67    0.27
  10  -1  -8    2.87    0.31
  10  -1  -8    2.91    0.45
  10   1   8    3.02    0.42
 -10  -1   8    3.47    0.49
  10  -1   8    3.50    0.43
  10   1  -8    3.53    0.33
 -10   1   8    3.66    0.45
   0   1   9   12.53    0.54
   0  -1  -9   14.12    0.48
   0  -1  -9   13.99    0.45
   0   1  -9   13.16    0.47
   0   1  -9   13.26    0.44
   0  -1   9   13.05    0.54
   0   1  -9   13.23    0.51
   0  -1  -9   13.10    0.43
   0   1   9   13.63    0.53
   0  -1   9   13.38    0.48
   1  -1  -9   19.68    0.66
   1  -1  -9   19.89    0.58
  -1  -1   9   19.74    0.64
  -1  -1   9   19.86    0.73
   1  -1  -9   19.95    0.57
   1   1   9   19.66    0.71
  -1   1  -9   18.98    0.68
   1   1   9   20.40    0.73
  -1   1  -9   19.80    0.64
   1  -1   9   19.66    0.74
  -1  -1  -9   20.46    0.64
  -1   1   9   20.69    0.72
   1   1  -9   21.00    0.72
   1  -1   9   21.06    0.69
   1   1  -9   20.10    0.61
  -1   1   9   20.32    0.74
  -1  -1  -9   20.61    0.66
   1   1  -9   20.80    0.63
   2   1   9  104.93    2.93
  -2   1  -9   99.16    2.81
  -2   1  -9  100.43    2.88
  -2  -1   9  106.39    2.84
   2   1   9  105.17    2.99
   2   1  -9  107.07    2.73
   2  -1   9  103.76    2.97
  -2   1   9  101.85    2.88
   2  -1   9  103.46    2.86
   2   1  -9   98.87    2.87
   2   1  -9  106.12    3.02
   2   1  -9   98.78    2.71
  -2  -1  -9  100.11    2.80
  -2   1   9  100.08    2.96
  -2  -1  -9  106.28    2.79
   3   1   9    1.28    0.17
   3   1   9    1.18    0.18
  -3   1  -9    1.41    0.15
  -3   1  -9    1.23    0.16
  -3   1   9    1.67    0.18
  -3   1   9    1.31    0.17
  -3  -1  -9    1.65    0.15
  -3  -1  -9    1.34    0.15
   3  -1   9    1.05    0.16
  -3   1   9    1.40    0.17
   3   1  -9    1.50    0.12
   3   1  -9    1.26    0.09
   3  -1   9    1.47    0.18
   3   1  -9    1.22    0.15
   3   1  -9    1.25    0.17
   3   1  -9    1.38    0.19
  -4  -1   9   12.06    0.57
  -4   1  -9   12.96    0.53
   4   1   9   12.00    0.54
   4   1   9   12.30    0.53
  -4   1  -9   12.26    0.50
   4   1  -9   12.60    0.51
  -4  -1  -9   12.24    0.48
  -4  -1  -9   12.34    0.50
   4   1  -9   12.25    0.40
   4  -1   9   12.49    0.53
   4   1  -9   12.77    0.56
   4  -1   9   12.77    0.52
  -4   1   9   11.71    0.54
  -4   1   9   12.50    0.53
  -4   1   9   12.71    0.55
   5  -1  -9   12.94    0.59
  -5  -1   9   14.07    0.64
   5  -1  -9   13.56    0.40
  -5   1  -9   12.80    0.57
   5   1   9   13.77    0.58
   5  -1  -9   14.30    0.59
   5  -1  -9   13.61    0.42
  -5   1  -9   13.54    0.56
   5   1   9   13.22    0.60
  -5   1   9   13.92    0.63
  -5  -1  -9   14.00    0.56
   5  -1   9   13.63    0.56
   5   1  -9   13.86    0.46
   5  -1   9   13.30    0.59
   5   1  -9   13.99    0.61
   5   1  -9   13.92    0.58
  -5  -1  -9   13.88    0.56
   6   1   9   10.80    0.51
   6  -1  -9   11.95    0.58
  -6   1  -9   11.89    0.56
  -6  -1   9   10.94    0.60
   6   1   9   11.12    0.57
   6  -1  -9   12.12    0.41
   6   1  -9   11.69    0.43
   6  -1   9   11.11    0.55
  -6  -1  -9   10.93    0.52
  -6   1   9   11.57    0.60
  -7  -1   9    7.80    0.52
   7   1   9    7.79    0.49
  -7   1  -9    7.50    0.46
   7  -1  -9    8.09    0.51
   7  -1  -9    7.99    0.34
  -7   1   9    8.72    0.54
   7  -1   9    7.83    0.48
   7   1  -9    8.29    0.38
  -8  -1   9    0.68    0.26
  -8   1  -9    0.74    0.23
   8  -1  -9    0.98    0.17
   8   1   9    0.81    0.23
   8  -1  -9    0.60    0.26
   8  -1   9    0.71    0.24
  -8   1   9    0.29    0.23
   8   1  -9    0.94    0.18
   9  -1  -9    1.68    0.22
   9   1   9    2.00    0.32
   9  -1  -9    1.26    0.33
  -9  -1   9    0.78    0.30
   9   1  -9    1.79    0.23
   9  -1   9    1.48    0.31
  -9   1   9    1.71    0.35
  10   1   9    0.67    0.30
  10  -1  -9    0.51    0.19
 -10  -1   9    0.31    0.30
 -10   1   9    0.71    0.33
  10   1  -9    0.06    0.20
  10  -1   9    0.26    0.30
   0   1 -10    8.85    0.34
   0  -1  10    8.90    0.43
   0   1  10    8.80    0.44
   0   1  10    9.45    0.43
   0   1 -10    8.98    0.40
   0  -1 -10    8.86    0.36
   0  -1 -10    8.58    0.33
   0  -1  10    8.99    0.38
   1   1  10    6.90    0.37
   1  -1 -10    7.14    0.26
   1  -1 -10    7.33    0.34
   1  -1 -10    7.45    0.27
  -1  -1  10    7.61    0.40
   1   1  10    7.08    0.38
  -1   1 -10    7.21    0.31
  -1   1 -10    7.19    0.35
  -1  -1  10    7.25    0.32
   1  -1  10    8.17    0.36
   1   1 -10    7.79    0.37
  -1  -1 -10    7.61    0.31
   1  -1  10    7.33    0.38
  -1   1  10    7.66    0.38
   1   1 -10    6.94    0.28
  -1   1  10    6.92    0.38
  -1  -1 -10    7.49    0.32
  -2   1 -10    3.54    0.25
   2   1  10    3.48    0.27
  -2   1 -10    3.59    0.23
   2  -1 -10    3.78    0.14
  -2  -1  10    3.90    0.23
   2  -1 -10    3.40    0.13
   2  -1 -10    3.35    0.24
   2   1  10    3.65    0.28
   2   1 -10    3.92    0.21
   2   1 -10    3.45    0.25
   2  -1  10    3.60    0.27
  -2   1  10    3.60    0.27
   2   1 -10    3.38    0.17
   2   1 -10    3.94    0.30
  -2  -1 -10    4.26    0.24
   2  -1  10    3.78    0.26
  -2  -1 -10    4.02    0.22
  -2   1  10    3.71    0.27
   3   1  10   10.61    0.49
   3   1  10   10.79    0.50
  -3   1 -10   10.46    0.44
  -3   1 -10   10.32    0.47
  -3   1  10   11.82    0.52
  -3  -1 -10   11.06    0.46
   3   1 -10   11.46    0.52
   3   1 -10   11.87    0.55
   3   1 -10   11.73    0.37
  -3  -1 -10   11.15    0.45
   3  -1  10   11.96    0.52
  -3   1  10   11.67    0.51
  -3   1  10   11.89    0.52
   3  -1  10   11.19    0.49
   4   1  10   46.26    1.50
  -4   1 -10   48.86    1.47
  -4   1 -10   46.18    1.43
   4   1  10   47.27    1.51
  -4  -1 -10   48.32    1.42
   4   1 -10   45.42    1.28
  -4   1  10   45.21    1.48
  -4   1  10   47.67    1.50
  -4   1  10   47.46    1.48
   4  -1  10   48.23    1.47
   4  -1  10   44.98    1.48
   4   1 -10   47.11    1.54
   5  -1 -10    6.17    0.39
  -5  -1  10    6.20    0.42
  -5   1 -10    5.94    0.36
   5   1  10    6.50    0.37
   5   1  10    5.19    0.37
  -5   1 -10    5.88    0.37
   5  -1 -10    6.00    0.37
   5  -1 -10    6.15    0.22
   5  -1  10    5.93    0.35
  -5   1  10    5.68    0.39
  -5  -1 -10    6.35    0.36
   5   1 -10    5.76    0.25
   5  -1  10    5.78    0.37
   5   1 -10    5.75    0.38
   6  -1 -10    4.25    0.21
  -6  -1  10    4.10    0.39
   6  -1 -10    4.63    0.37
   6   1  10    4.56    0.33
   6   1  10    4.17    0.36
  -6   1 -10    4.18    0.35
  -6   1  10    4.97    0.39
   6   1 -10    4.57    0.24
  -6  -1 -10    3.59    0.31
   6  -1  10    4.41    0.34
  -7  -1  10    4.17    0.41
  -7   1 -10    4.19    0.36
   7  -1 -10    3.62    0.38
   7   1  10    3.86    0.38
   7  -1 -10    3.52    0.23
  -7   1  10    4.21    0.41
   7  -1  10    4.42    0.39
   7   1 -10    3.78    0.26
   8  -1 -10    9.77    0.43
  -8  -1  10    9.35    0.63
   8  -1 -10   10.01    0.62
   8   1  10    9.64    0.59
   8  -1  10    8.68    0.57
  -8   1  10   10.09    0.62
   8   1 -10   10.12    0.45
  -9  -1  10    1.64    0.36
   9   1  10    1.13    0.29
   9  -1 -10    1.16    0.20
   9   1 -10    1.19    0.21
   9  -1  10    0.82    0.29
  -9   1  10    0.77    0.30
  10  -1  10    7.28    0.59
   0  -1  11    6.20    0.37
   0   1  11    5.82    0.36
   0  -1 -11    6.99    0.32
   0  -1 -11    6.15    0.27
   0   1 -11    6.06    0.34
   0  -1  11    6.62    0.32
   0   1 -11    6.26    0.28
   0   1  11    6.25    0.35
  -1   1 -11   10.24    0.41
   1  -1 -11   11.02    0.44
   1  -1 -11   10.28    0.36
  -1  -1  11   10.59    0.42
  -1   1 -11   10.69    0.47
  -1  -1  11   10.62    0.51
   1   1  11    9.98    0.50
   1   1  11   11.00    0.49
  -1  -1 -11   11.22    0.41
  -1   1  11   10.54    0.50
  -1  -1 -11    9.97    0.42
  -1   1  11   10.07    0.47
   1  -1  11   10.59    0.51
   1   1 -11   10.79    0.38
   1   1 -11   10.66    0.47
   1  -1  11   10.41    0.45
  -2   1 -11   14.95    0.57
   2  -1 -11   15.66    0.61
   2  -1 -11   16.60    0.48
   2   1  11   15.60    0.66
   2  -1 -11   17.15    0.49
  -2   1 -11   16.37    0.63
   2   1  11   16.18    0.67
   2  -1  11   14.84    0.64
  -2  -1 -11   15.79    0.57
   2   1 -11   15.88    0.50
  -2   1  11   15.65    0.62
   2   1 -11   15.50    0.68
  -2   1  11   15.78    0.66
   2  -1  11   16.27    0.61
   2   1 -11   16.16    0.63
   3  -1 -11    4.45    0.30
   3   1  11    4.23    0.32
  -3   1 -11    4.79    0.30
   3   1  11    4.61    0.32
  -3   1 -11    4.64    0.28
   3   1 -11    3.95    0.19
   3  -1  11    5.21    0.32
   3  -1  11    4.47    0.31
   3   1 -11    4.13    0.30
  -3   1  11    4.88    0.32
  -3  -1 -11    4.77    0.28
  -3   1  11    4.70    0.32
   3   1 -11    4.43    0.34
  -4   1 -11   15.83    0.63
   4   1  11   15.75    0.66
   4   1  11   14.71    0.66
  -4   1 -11   14.16    0.59
   4   1 -11   15.14    0.48
   4   1 -11   14.90    0.68
   4  -1  11   15.74    0.64
  -4  -1 -11   15.98    0.61
   4  -1  11   15.70    0.65
  -4   1  11   15.11    0.64
   4   1 -11   15.38    0.66
  -4   1  11   15.51    0.65
  -4   1  11   15.58    0.67
   5   1  11    6.48    0.42
  -5   1 -11    7.03    0.40
   5  -1 -11    6.70    0.42
   5   1  11    6.94    0.41
  -5   1 -11    6.44    0.40
   5  -1 -11    6.80    0.42
  -5  -1 -11    6.33    0.37
   5   1 -11    7.61    0.44
   5  -1  11    6.15    0.39
  -5   1  11    6.46    0.44
   5  -1  11    6.60    0.39
   5   1 -11    6.60    0.27
  -6  -1  11   40.50    1.48
   6  -1 -11   42.71    1.17
   6   1  11   41.50    1.41
   6  -1 -11   41.79    1.44
   6   1  11   40.90    1.45
  -6   1 -11   43.60    1.41
  -6   1  11   42.39    1.48
   6   1 -11   41.89    1.21
   6  -1  11   41.25    1.43
  -6  -1 -11   43.04    1.38
  -7  -1  11    3.41    0.39
   7   1  11    3.91    0.37
   7  -1 -11    3.33    0.21
   7  -1  11    4.01    0.39
   7   1 -11    3.43    0.24
  -7   1  11    3.41    0.38
   8   1  11    0.49    0.22
  -8  -1  11    0.37    0.27
   8  -1 -11    0.29    0.14
  -8   1  11    0.52    0.27
   8   1 -11    0.15    0.14
   8  -1  11    0.09    0.23
   9   1  11    1.86    0.36
  -9  -1  11    2.34    0.42
   9  -1 -11    1.77    0.23
   9  -1  11    1.68    0.36
   9   1 -11    2.06    0.25
  -9   1  11    1.84    0.36
   0   1 -12   34.62    1.13
   0  -1 -12   32.37    1.01
   0  -1 -12   35.67    1.08
   0   1  12   36.75    1.15
   0   1 -12   32.31    1.02
   0  -1  12   34.26    1.21
   0   1  12   34.88    1.20
  -1   1 -12   10.48    0.48
  -1   1 -12   10.29    0.42
  -1  -1  12    9.92    0.51
   1  -1 -12   10.80    0.45
   1  -1 -12   10.04    0.36
   1   1  12    9.95    0.49
   1   1  12    9.89    0.51
   1  -1  12   10.15    0.45
  -1   1  12   10.66    0.49
   1   1 -12   10.40    0.39
  -1   1  12   11.47    0.54
   1  -1  12   10.72    0.52
  -1  -1 -12    9.88    0.41
   1   1 -12   10.67    0.49
   2   1  12   20.10    0.79
   2  -1 -12   20.44    0.60
   2   1  12   20.52    0.82
   2  -1 -12   20.73    0.74
  -2   1 -12   20.85    0.76
  -2   1 -12   19.22    0.70
   2   1 -12   19.77    0.83
   2   1 -12   19.31    0.61
   2   1 -12   19.71    0.75
   2  -1  12   19.43    0.79
  -2   1  12   19.76    0.75
  -2   1  12   19.01    0.78
   2  -1  12   20.92    0.74
  -2  -1 -12   19.58    0.68
   3   1  12   18.23    0.76
   3   1  12   18.57    0.76
  -3   1 -12   18.29    0.72
   3  -1 -12   18.39    0.71
  -3   1 -12   18.35    0.68
  -3   1  12   18.49    0.71
   3   1 -12   17.79    0.78
   3   1 -12   16.53    0.54
   3  -1  12   18.68    0.70
   3   1 -12   16.80    0.71
  -3   1  12   18.08    0.74
   3  -1  12   17.80    0.73
  -3  -1 -12   17.58    0.65
   4   1  12   20.75    0.83
  -4   1 -12   20.46    0.78
  -4   1 -12   19.70    0.75
   4   1  12   19.41    0.81
   4   1 -12   18.91    0.58
  -4   1  12   19.03    0.77
   4  -1  12   19.19    0.78
  -4   1  12   20.42    0.78
   4   1 -12   19.01    0.78
   4  -1  12   18.74    0.75
   4   1 -12   19.78    0.82
  -4  -1 -12   18.59    0.71
   5  -1 -12    0.49    0.18
   5  -1 -12    0.22    0.17
   5   1  12    0.29    0.17
   5   1  12    0.06    0.16
  -5   1 -12    0.38    0.17
  -5  -1 -12    0.56    0.16
   5  -1  12    0.42    0.18
   5   1 -12    0.31    0.09
   5  -1  12    0.49    0.17
  -5   1  12    0.08    0.19
   5   1 -12    0.27    0.17
   5   1 -12    0.37    0.18
   6  -1 -12    4.89    0.22
   6   1  12    4.93    0.38
   6   1  12    5.23    0.43
  -6   1  12    4.87    0.43
  -6  -1 -12    4.48    0.36
   6  -1  12    4.76    0.41
   6   1 -12    4.61    0.25
   7   1  12    1.82    0.30
   7  -1 -12    1.88    0.17
  -7  -1  12    1.72    0.31
  -7   1  12    2.13    0.34
   7  -1  12    1.94    0.31
   7   1 -12    2.26    0.20
   8   1  12    0.47    0.25
  -8  -1  12    0.57    0.28
   8  -1 -12    0.76    0.16
  -8   1  12    0.12    0.24
   8   1 -12    0.59    0.16
   8  -1  12    0.92    0.27
   9   1  12   15.31    0.84
   9  -1 -12   13.94    0.56
  -9  -1  12   12.29    0.79
   9   1 -12   13.64    0.57
   9  -1  12   13.43    0.77
  -9   1  12   13.43    0.82
   0   1 -13   15.15    0.55
   0   1  13   16.53    0.65
   0  -1  13   14.52    0.68
   0  -1 -13   15.75    0.53
   0   1  13   13.96    0.66
   0   1 -13   15.04    0.63
   1   1  13    0.67    0.18
  -1   1 -13    0.54    0.13
  -1  -1  13    0.47    0.18
   1  -1 -13    0.44    0.10
   1   1  13    0.44    0.17
  -1   1 -13    0.64    0.17
  -1   1  13    0.80    0.19
   1  -1  13    0.56    0.18
   1   1 -13    0.68    0.17
   1   1 -13    0.64    0.12
  -1  -1 -13    0.58    0.12
  -1   1  13    0.70    0.18
   2  -1 -13   40.27    1.26
   2   1  13   40.63    1.33
  -2   1 -13   38.27    1.21
   2   1  13   37.53    1.35
   2  -1 -13   38.91    1.09
  -2   1 -13   38.74    1.28
   2   1 -13   39.74    1.27
   2  -1  13   38.22    1.33
   2   1 -13   37.95    1.38
  -2   1  13   37.51    1.25
  -2   1  13   36.59    1.31
   2   1 -13   37.63    1.10
  -2  -1 -13   38.27    1.18
  -3   1 -13   14.83    0.60
   3   1  13   15.30    0.68
  -3   1 -13   14.43    0.64
   3  -1 -13   15.35    0.63
   3   1  13   14.68    0.68
   3  -1 -13   15.01    0.45
   3   1 -13   15.36    0.66
  -3   1  13   15.71    0.70
  -3   1  13   16.35    0.67
  -3  -1 -13   15.96    0.62
   3   1 -13   15.31    0.73
   3  -1  13   15.03    0.65
   3  -1  13   15.07    0.69
   3   1 -13   15.20    0.50
   4   1  13    1.12    0.22
  -4   1 -13    1.14    0.19
   4   1  13    1.01    0.22
   4  -1 -13    1.31    0.22
   4   1 -13    1.25    0.24
   4   1 -13    0.93    0.21
   4  -1  13    1.09    0.21
  -4  -1 -13    1.19    0.19
   4   1 -13    1.15    0.11
   4  -1  13    1.16    0.21
   5   1  13   12.21    0.63
   5   1  13   12.86    0.63
   5  -1 -13   12.12    0.63
  -5   1 -13   11.95    0.58
   5   1 -13   12.31    0.43
  -5  -1 -13   12.70    0.58
   5  -1  13   12.53    0.61
   5  -1  13   11.80    0.60
   5   1 -13   13.91    0.66
   5   1 -13   12.77    0.65
   6   1  13    4.60    0.43
   6   1  13    4.75    0.40
   6   1 -13    5.40    0.45
   6   1 -13    4.37    0.24
  -6   1  13    4.80    0.44
   6  -1  13    4.93    0.42
  -6  -1 -13    4.59    0.38
   7  -1 -13    0.20    0.11
   7   1  13   -0.13    0.21
  -7   1  13    0.08    0.23
   7   1 -13    0.23    0.13
   7  -1  13    0.26    0.22
  -8  -1  13    4.20    0.51
   8   1  13    3.88    0.45
   8  -1 -13    4.59    0.28
   8   1 -13    4.64    0.30
   8  -1  13    3.65    0.44
  -8   1  13    4.90    0.50
   9  -1  13    0.54    0.30
   0  -1  14   11.90    0.62
   0  -1 -14   12.26    0.47
   0   1 -14   13.22    0.58
   0   1 -14   12.21    0.49
   0   1  14   13.55    0.60
   0   1  14   12.16    0.62
  -1   1 -14    8.60    0.45
   1   1  14    8.16    0.49
   1  -1 -14    7.85    0.33
  -1   1 -14    8.08    0.39
   1   1  14    9.00    0.49
   1   1 -14    7.90    0.36
   1  -1  14    7.95    0.49
  -1   1  14    8.06    0.49
  -1   1  14    8.44    0.46
  -1  -1 -14    8.08    0.37
   1   1 -14    8.77    0.47
  -2   1 -14    2.76    0.25
   2  -1 -14    2.35    0.16
   2   1  14    2.51    0.29
   2   1  14    2.34    0.28
   2   1 -14    2.23    0.18
   2   1 -14    2.42    0.27
  -2   1  14    2.28    0.28
   2  -1  14    2.26    0.29
  -2  -1 -14    3.14    0.24
   2   1 -14    1.93    0.29
   3  -1 -14    0.16    0.16
  -3   1 -14    0.54    0.16
   3   1  14    0.21    0.17
   3   1  14    0.43    0.19
   3  -1 -14    0.53    0.09
   3   1 -14    0.42    0.17
   3   1 -14    0.20    0.19
   3   1 -14    0.44    0.10
   3  -1  14    0.10    0.16
  -3   1  14    0.43    0.18
  -3  -1 -14    0.49    0.16
   4  -1 -14   11.94    0.65
   4  -1 -14   12.59    0.60
   4   1  14   12.23    0.64
  -4   1 -14   12.86    0.58
   4   1  14   11.98    0.63
  -4  -1 -14   11.78    0.55
   4   1 -14   12.43    0.61
   4  -1  14   12.24    0.62
   4   1 -14   12.59    0.66
   4   1 -14   12.08    0.43
   5   1  14   10.15    0.58
   5  -1 -14    9.51    0.54
   5  -1 -14    9.45    0.57
   5   1  14    9.27    0.57
  -5   1 -14   10.00    0.53
   5  -1  14    9.36    0.55
   5   1 -14    9.84    0.36
   5  -1  14   10.15    0.55
   5   1 -14   10.21    0.57
   5   1 -14    8.98    0.57
  -5  -1 -14   10.86    0.54
   6   1  14    1.73    0.30
   6   1  14    1.81    0.29
   6  -1  14    1.79    0.30
  -6  -1 -14    1.20    0.24
   6   1 -14    1.67    0.29
   6   1 -14    1.71    0.16
   7   1  14    1.18    0.30
   7  -1 -14    0.66    0.12
   7   1 -14    0.73    0.26
   7   1 -14    0.72    0.14
   7  -1  14    0.95    0.27
  -7   1  14    0.49    0.29
   8   1  14   15.79    0.84
   8  -1 -14   15.91    0.55
  -8   1  14   17.37    0.93
   8   1 -14   16.86    0.62
   8   1 -14   18.18    0.92
   8  -1  14   16.65    0.86
   0   1  15    9.63    0.56
   0  -1 -15    9.51    0.41
   0  -1  15    9.57    0.55
   0   1 -15   10.24    0.51
   0   1 -15    9.92    0.43
   1   1  15    1.35    0.25
   1  -1 -15    1.31    0.15
   1   1  15    1.26    0.24
  -1   1 -15    1.37    0.18
   1   1 -15    1.37    0.28
   1   1 -15    1.35    0.16
  -1  -1 -15    1.23    0.17
   1   1 -15    1.65    0.24
  -1   1  15    1.08    0.22
   1  -1  15    1.35    0.23
   2   1  15   24.69    0.94
   2   1  15   23.61    0.98
   2  -1 -15   22.49    0.72
  -2   1 -15   23.82    0.84
  -2  -1 -15   24.36    0.86
   2   1 -15   24.84    0.80
   2   1 -15   25.30    1.07
   2  -1  15   24.78    1.02
   2   1 -15   25.80    0.96
  -2   1  15   25.43    1.02
  -3   1 -15    3.89    0.31
   3   1  15    3.37    0.36
   3  -1 -15    3.10    0.18
   3   1  15    3.13    0.34
  -3  -1 -15    2.88    0.27
   3   1 -15    3.33    0.33
   3  -1  15    2.80    0.33
   3   1 -15    2.92    0.36
   3   1 -15    3.10    0.20
  -3   1  15    3.36    0.34
   4  -1 -15    2.52    0.33
   4   1  15    2.32    0.32
   4   1  15    2.74    0.33
  -4   1 -15    2.54    0.29
   4   1 -15    2.18    0.17
  -4  -1 -15    2.60    0.27
   4  -1  15    2.07    0.30
   4   1 -15    2.20    0.30
   4   1 -15    2.24    0.33
   5   1  15    2.91    0.36
  -5   1 -15    3.06    0.31
   5  -1 -15    2.48    0.36
   5   1  15    3.03    0.37
   5  -1 -15    3.24    0.34
   5   1 -15    2.68    0.37
   5   1 -15    3.12    0.37
   5  -1  15    2.37    0.32
  -5  -1 -15    3.07    0.31
   5   1 -15    2.56    0.18
   6   1  15    3.88    0.41
   6  -1 -15    4.78    0.45
   6   1  15    4.48    0.44
   6   1 -15    4.68    0.25
  -6  -1 -15    4.15    0.38
   6   1 -15    4.26    0.44
   7   1  15    6.07    0.56
   7  -1 -15    5.94    0.51
   7   1 -15    6.69    0.55
   7   1 -15    6.00    0.31
   0   1  16    7.62    0.51
   0  -1 -16    8.86    0.39
   0   1 -16    8.57    0.41
  -1   1 -16    4.75    0.32
   1  -1 -16    4.74    0.27
   1   1  16    4.34    0.41
   1  -1  16    5.09    0.44
  -1  -1 -16    5.10    0.32
  -1   1  16    5.30    0.42
   1   1 -16    5.71    0.47
   1   1 -16    4.38    0.28
   2   1  16    4.16    0.41
   2  -1 -16    4.68    0.24
  -2   1 -16    4.43    0.33
   2   1 -16    4.51    0.28
  -2   1  16    5.25    0.44
   2   1 -16    4.73    0.38
  -2  -1 -16    4.48    0.32
   2   1 -16    4.14    0.43
   2  -1  16    4.57    0.42
  -3   1 -16    6.76    0.41
   3  -1 -16    6.44    0.28
   3   1  16    6.86    0.50
   3   1 -16    7.10    0.52
   3   1 -16    6.96    0.46
  -3   1  16    6.88    0.48
  -3  -1 -16    6.26    0.40
   3   1 -16    6.55    0.32
   3  -1  16    6.22    0.47
  -4   1 -16    8.39    0.49
   4   1  16   10.55    0.60
   4   1  16    9.35    0.58
   4  -1 -16    9.63    0.33
   4  -1 -16    8.98    0.60
   4   1 -16    7.87    0.57
   4   1 -16    8.66    0.36
   4   1 -16    9.33    0.54
   4  -1  16   10.06    0.60
  -4  -1 -16    8.76    0.48
   5   1  16    1.71    0.32
  -5   1 -16    2.00    0.29
   5  -1 -16    1.62    0.32
   5   1  16    1.67    0.33
   5   1 -16    1.43    0.30
   5   1 -16    1.90    0.17
   5  -1  16    2.05    0.32
  -5  -1 -16    1.90    0.27
   5   1 -16    2.20    0.35
   6   1  16    2.55    0.38
   6   1  16    2.85    0.41
   6   1 -16    2.49    0.37
   6   1 -16    2.79    0.21
   7   1  16    2.61    0.40
   7   1 -16    2.14    0.40
   7   1 -16    2.50    0.21
   0   1 -17    3.69    0.28
   0   1 -17    3.02    0.39
   0  -1 -17    3.49    0.26
   0   1  17    3.04    0.35
   1   1  17    6.19    0.48
  -1   1 -17    5.88    0.37
   1  -1 -17    6.13    0.32
  -1   1  17    6.70    0.49
   1   1 -17    5.99    0.53
  -1  -1 -17    5.81    0.35
   1   1 -17    6.30    0.34
   2   1  17    5.58    0.47
   2  -1 -17    5.93    0.30
  -2   1 -17    6.75    0.39
   2   1 -17    5.95    0.33
  -2   1  17    6.45    0.49
   2  -1  17    6.41    0.49
  -2  -1 -17    6.99    0.40
   2   1 -17    6.32    0.53
  -3   1 -17    1.49    0.25
   3   1  17    1.13    0.27
   3  -1 -17    1.51    0.15
   3   1 -17    0.94    0.29
  -3  -1 -17    1.57    0.24
   3   1 -17    1.54    0.18
   3  -1  17    1.80    0.32
  -4   1 -17   13.49    0.65
   4  -1 -17   12.93    0.44
   4  -1 -17   13.01    0.75
   4   1  17   13.01    0.73
  -4  -1 -17   12.06    0.60
   4   1 -17   12.32    0.47
   4  -1  17   12.22    0.70
   4   1 -17   12.69    0.67
   4   1 -17   12.50    0.73
  -5   1 -17    0.41    0.25
   5   1  17    0.55    0.26
   5   1 -17    0.60    0.27
   5   1 -17    0.44    0.27
   5  -1  17    0.42    0.25
  -5  -1 -17    0.43    0.25
   5   1 -17    0.45    0.14
   6   1  17    8.84    0.64
   6   1 -17    8.11    0.58
   6   1 -17    8.14    0.36
   0   1 -18    8.46    0.63
   0   1  18    9.96    0.63
   0  -1 -18    9.91    0.45
   0   1 -18    9.45    0.46
   1  -1 -18    2.57    0.22
  -1   1 -18    2.28    0.25
   1   1  18    2.26    0.35
  -1   1 -18    1.99    0.38
   1   1 -18    2.13    0.23
   1   1 -18    1.30    0.31
  -1   1  18    1.73    0.31
  -1  -1 -18    2.13    0.24
  -2   1 -18    2.99    0.29
   2   1  18    2.06    0.33
   2  -1 -18    2.84    0.22
  -2   1  18    2.55    0.35
   2   1 -18    2.51    0.40
  -2  -1 -18    3.55    0.31
   2   1 -18    2.97    0.25
   3  -1 -18    0.19    0.25
  -3   1 -18    0.45    0.22
   3   1  18    0.76    0.26
   3   1 -18    0.56    0.29
  -3  -1 -18    0.89    0.22
   3   1 -18    1.08    0.17
   4  -1 -18    4.34    0.23
   4  -1 -18    4.33    0.48
   4   1  18    3.76    0.46
  -4   1 -18    4.88    0.42
   4   1 -18    5.19    0.29
  -4  -1 -18    4.37    0.39
   4   1 -18    4.52    0.52
   5   1  18    3.77    0.45
  -5   1 -18    3.27    0.37
  -5  -1 -18    3.44    0.38
   5   1 -18    3.91    0.48
   5   1 -18    3.90    0.26
   0   1 -19    3.83    0.32
   0  -1 -19    4.21    0.31
   0   1  19    2.98    0.41
   0   1 -19    4.92    0.51
  -1   1 -19    0.27    0.29
   1  -1 -19    0.78    0.17
  -1   1 -19    0.65    0.20
   1   1  19    0.44    0.22
  -1   1  19    0.60    0.28
  -1  -1 -19    0.29    0.19
   1   1 -19    0.36    0.29
   1   1 -19    0.27    0.17
   2  -1 -19   10.48    0.44
   2   1  19    9.79    0.66
  -2   1 -19    9.97    0.54
  -2   1 -19   10.39    0.72
  -2  -1 -19   10.91    0.53
   2   1 -19    8.47    0.67
   2   1 -19   10.80    0.47
  -3   1 -19    4.48    0.54
   3  -1 -19    4.34    0.26
  -3   1 -19    5.68    0.42
   3  -1 -19    4.80    0.53
   3   1  19    4.65    0.50
   3   1 -19    4.52    0.31
  -3  -1 -19    4.97    0.37
   3   1 -19    3.97    0.50
   4  -1 -19    8.14    0.64
   4  -1 -19    8.56    0.35
   4   1 -19    7.35    0.64
   0   2   0  277.46    7.43
   0   2   0  289.12    7.76
   0   2   0  295.46    7.58
   0  -2   0  280.19    7.43
   0   2   0  291.30    7.53
  -1   2   0    0.14    0.04
   1   2   0    0.13    0.05
   1   2   0    0.13    0.04
   1   2   0    0.12    0.04
  -1  -2   0    0.13    0.04
   1  -2   0    0.15    0.05
   1   2   0    0.10    0.04
  -1   2   0    0.07    0.04
  -1   2   0    0.14    0.04
  -2  -2   0  378.46   10.08
  -2   2   0  402.63   10.39
   2   2   0  388.66    9.96
   2   2   0  376.24   10.39
  -2   2   0  370.40   10.10
   2   2   0  376.82   10.13
  -2  -2   0  393.60    9.95
   2  -2   0  388.44   10.17
   2  -2   0  382.65    9.96
   3   2   0   95.85    2.65
   3   2   0   95.23    2.60
   3  -2   0   95.17    2.64
  -3  -2   0   98.61    2.60
   3  -2   0   94.29    2.55
  -3  -2   0   95.81    2.53
  -3   2   0   93.00    2.61
   3   2   0   91.63    2.54
   4  -2   0   28.20    0.84
  -4  -2   0   28.18    0.82
   4   2   0   25.31    0.86
  -4  -2   0   27.71    0.87
   4   2   0   29.50    0.86
   4   2   0   27.24    0.84
  -4   2   0   26.13    0.88
   4  -2   0   26.69    0.90
   5   2   0    0.87    0.13
   5  -2   0    0.57    0.14
   5   2   0    1.10    0.15
  -5  -2   0    0.86    0.14
  -5  -2   0    0.66    0.11
  -5   2   0    0.68    0.13
   5   2   0    0.75    0.11
   5  -2   0    0.60    0.11
  -6   2   0   12.36    0.56
  -6  -2   0   13.05    0.55
   6  -2   0   12.55    0.51
   6   2   0   12.82    0.47
   6   2   0   12.89    0.52
   6   2   0   12.63    0.54
   6  -2   0   12.27    0.58
   7  -2   0   15.69    0.62
   7  -2   0   14.75    0.68
  -7   2   0   15.23    0.68
   7   2   0   14.92    0.65
  -7  -2   0   15.65    0.66
   7   2   0   16.36    0.64
  -8   2   0   53.19    1.84
   8   2   0   58.42    1.77
  -8  -2   0   55.88    1.83
   8   2   0   60.16    1.86
   8  -2   0   59.40    1.78
   8  -2   0   57.99    1.90
  -9  -2   0    2.58    0.34
  -9   2   0    2.39    0.33
   9  -2   0    2.46    0.35
   9   2   0    2.47    0.29
   9  -2   0    2.17    0.28
   9   2   0    2.88    0.33
 -10  -2   0   10.73    0.67
  10  -2   0   10.99    0.60
  10  -2   0   10.03    0.66
  10   2   0   10.41    0.65
  10   2   0   11.09    0.61
 -10   2   0   10.58    0.66
  11   2   0    0.12    0.26
 -11  -2   0    0.23    0.31
  11  -2   0    0.24    0.27
  11  -2   0    0.18    0.26
  11   2   0    0.48    0.29
 -11   2   0   -0.05    0.27
   0   2  -1    2.92    0.15
   0   2   1    2.63    0.15
   0   2  -1    3.03    0.14
   0  -2  -1    2.83    0.13
   0   2   1    2.77    0.12
   0   2  -1    2.77    0.14
   0   2  -1    3.00    0.12
   0  -2   1    2.82    0.14
   0   2   1    2.88    0.14
  -1  -2   1  121.00    3.35
  -1   2  -1  125.70    3.35
   1   2   1  132.48    3.35
   1   2   1  124.82    3.42
   1   2   1  131.53    3.38
  -1   2  -1  129.45    3.49
   1   2   1  133.29    3.52
   1  -2  -1  126.38    3.34
  -1   2  -1  124.31    3.41
   1   2  -1  132.25    3.46
   1   2  -1  133.18    3.46
  -1   2   1  127.03    3.49
   1   2  -1  125.96    3.57
   1  -2   1  131.11    3.48
   1  -2   1  132.53    3.42
   1   2  -1  126.09    3.40
  -1  -2  -1  128.27    3.40
  -1   2   1  131.65    3.55
  -1   2   1  130.69    3.46
   2  -2  -1   86.61    2.37
  -2   2  -1   90.30    2.38
   2   2   1   89.06    2.50
   2   2   1   88.73    2.39
   2   2   1   90.56    2.45
  -2   2  -1   90.02    2.45
  -2  -2   1   91.53    2.44
  -2  -2  -1   90.60    2.40
  -2  -2  -1   87.23    2.38
   2   2  -1   84.46    2.49
   2   2  -1   89.19    2.42
   2   2  -1   92.29    2.38
  -2   2   1   89.21    2.43
   2  -2   1   93.38    2.40
  -2   2   1   87.70    2.46
   2  -2   1   90.50    2.45
   3   2   1   18.02    0.59
   3  -2  -1   18.48    0.62
  -3   2  -1   17.61    0.60
   3  -2  -1   18.62    0.56
  -3   2  -1   17.56    0.55
   3   2   1   17.72    0.59
  -3  -2   1   17.27    0.59
   3   2   1   18.21    0.57
  -3   2  -1   17.38    0.52
   3   2  -1   18.17    0.58
  -3   2   1   18.87    0.63
   3   2  -1   19.23    0.62
   3  -2   1   18.72    0.60
  -3  -2  -1   18.51    0.58
  -3  -2  -1   18.98    0.60
  -3   2   1   19.29    0.54
   3  -2   1   19.35    0.64
   3   2  -1   19.45    0.61
  -4  -2   1    7.01    0.32
   4   2   1    7.16    0.31
   4   2   1    7.43    0.33
  -4   2  -1    6.81    0.33
   4  -2  -1    7.08    0.35
   4  -2  -1    6.70    0.29
   4   2   1    7.37    0.30
   4   2  -1    6.84    0.30
  -4  -2  -1    7.65    0.30
   4  -2   1    7.31    0.35
  -4  -2  -1    7.25    0.32
   4  -2   1    7.52    0.32
   4   2  -1    7.65    0.33
  -4   2   1    7.83    0.35
   4   2  -1    7.45    0.31
   5   2   1   19.66    0.65
   5  -2  -1   19.61    0.74
   5  -2  -1   19.73    0.65
   5   2   1   19.41    0.70
  -5  -2   1   19.77    0.71
  -5   2  -1   19.08    0.71
   5   2   1   18.80    0.66
  -5   2   1   19.74    0.71
   5   2  -1   18.91    0.69
  -5  -2  -1   19.33    0.68
   5   2  -1   18.61    0.65
  -5  -2  -1   19.41    0.64
   5  -2   1   19.05    0.72
   5  -2   1   20.40    0.68
   5   2  -1   19.60    0.65
   6   2   1    9.74    0.47
  -6   2  -1   10.19    0.48
   6  -2  -1    9.38    0.49
   6  -2  -1    9.63    0.42
  -6  -2   1    9.29    0.46
   6   2   1    9.75    0.44
   6   2   1   10.51    0.40
   6  -2   1   10.32    0.45
  -6  -2  -1    9.61    0.45
  -6   2   1    8.96    0.47
   6   2  -1   10.13    0.43
   6   2  -1    9.61    0.46
   6   2  -1   10.52    0.41
   6  -2   1    9.71    0.49
   7   2   1    2.75    0.25
   7  -2  -1    2.29    0.22
   7  -2  -1    2.35    0.28
   7   2   1    2.86    0.28
  -7   2  -1    2.88    0.28
  -7  -2   1    2.25    0.27
  -7  -2  -1    2.92    0.28
   7   2  -1    2.46    0.24
  -7   2   1    2.85    0.28
   7  -2   1    3.27    0.32
   7   2  -1    2.71    0.27
   7  -2   1    3.55    0.28
  -8   2  -1    1.26    0.24
   8  -2  -1    1.45    0.27
  -8  -2   1    0.98    0.24
   8   2   1    1.30    0.21
   8   2   1    1.58    0.24
   8  -2  -1    1.37    0.22
   8  -2   1    1.80    0.27
   8  -2   1    1.67    0.23
   8   2  -1    1.47    0.22
   8   2  -1    1.26    0.23
  -8  -2  -1    1.62    0.25
  -8   2   1    1.13    0.22
   9   2   1    0.26    0.20
  -9  -2   1    0.45    0.24
  -9   2  -1    0.45    0.21
   9  -2  -1    0.21    0.19
   9   2   1    0.39    0.19
   9  -2  -1    0.21    0.20
  -9   2   1    0.29    0.23
   9  -2   1    0.48    0.20
   9  -2   1    0.50    0.23
   9   2  -1    0.53    0.20
   9   2  -1    0.38    0.21
  -9  -2  -1    0.71    0.23
  10  -2  -1    1.47    0.27
  10   2   1    2.39    0.33
 -10   2  -1    1.89    0.34
 -10  -2   1    1.99    0.35
  10   2   1    1.77    0.32
  10  -2  -1    1.75    0.34
  10   2  -1    2.10    0.30
  10   2  -1    1.63    0.33
  10  -2   1    2.11    0.34
 -10  -2  -1    2.61    0.37
 -10   2   1    0.91    0.27
  10  -2   1    1.71    0.28
  11  -2  -1    0.39    0.25
  11   2   1   -0.03    0.26
  11  -2  -1    0.77    0.33
 -11   2  -1    0.41    0.27
 -11  -2   1    0.82    0.33
  11  -2   1    0.60    0.31
  11   2  -1    0.19    0.25
 -11  -2  -1    0.25    0.33
  11   2  -1    0.57    0.29
 -11   2   1    0.19    0.30
  11  -2   1    0.39    0.29
   0   2  -2    7.59    0.28
   0   2   2    7.55    0.23
   0   2  -2    7.58    0.23
   0   2  -2    7.27    0.27
   0   2   2    7.67    0.28
   0  -2  -2    7.50    0.24
   0   2  -2    7.44    0.26
   0   2   2    7.19    0.28
  -1   2  -2  127.34    3.45
   1   2   2  122.78    3.38
   1  -2  -2  118.21    3.27
  -1   2  -2  125.23    3.30
   1  -2  -2  121.70    3.28
   1   2   2  125.72    3.46
   1   2   2  130.35    3.30
   1   2   2  130.86    3.34
  -1   2  -2  128.50    3.37
   1   2  -2  129.41    3.36
  -1   2   2  126.11    3.34
   1  -2   2  123.45    3.32
   1   2  -2  120.13    3.46
   1  -2   2  130.27    3.36
   1   2  -2  122.96    3.29
   1   2  -2  127.33    3.35
  -1   2   2  126.18    3.44
  -1  -2  -2  130.55    3.30
  -1   2   2  120.80    3.39
  -2  -2   2  127.42    3.50
   2   2   2  124.96    3.51
   2   2   2  132.58    3.59
   2   2   2  127.57    3.43
  -2   2  -2  129.81    3.50
   2  -2  -2  133.10    3.40
  -2   2  -2  125.09    3.42
   2  -2  -2  134.49    3.41
  -2   2  -2  134.89    3.56
   2   2  -2  134.98    3.51
  -2   2   2  130.65    3.57
   2  -2   2  131.84    3.55
   2  -2   2  130.06    3.49
   2   2  -2  130.39    3.46
  -2  -2  -2  127.08    3.47
  -2  -2  -2  136.90    3.49
   2   2  -2  128.29    3.63
  -2   2   2  134.25    3.53
   3  -2  -2   27.93    0.90
   3   2   2   27.68    0.84
   3   2   2   28.35    0.87
   3  -2  -2   28.20    0.79
  -3   2  -2   28.40    0.83
  -3   2  -2   28.20    0.89
   3  -2  -2   26.74    0.80
  -3  -2   2   30.54    0.89
   3   2   2   27.58    0.86
  -3   2  -2   27.63    0.81
  -3   2   2   27.81    0.88
   3  -2   2   27.75    0.89
   3   2  -2   27.16    0.88
  -3   2   2   29.34    0.81
   3   2  -2   27.87    0.83
   3   2  -2   28.35    0.85
  -3  -2  -2   29.24    0.84
   3  -2   2   29.10    0.86
  -3  -2  -2   28.64    0.84
   4  -2  -2    9.03    0.32
  -4   2  -2    9.18    0.35
   4  -2  -2    8.71    0.34
  -4   2  -2    9.46    0.29
   4  -2  -2    8.62    0.41
  -4  -2   2    9.19    0.40
   4   2   2    9.32    0.36
   4   2   2    8.92    0.39
  -4   2  -2    8.92    0.39
   4   2   2    8.75    0.36
  -4   2   2    9.30    0.39
   4  -2   2    9.37    0.41
   4   2  -2    8.39    0.36
  -4  -2  -2    9.38    0.35
   4   2  -2    8.93    0.34
   4   2  -2    8.87    0.36
  -4  -2  -2    8.83    0.36
   4  -2   2    9.26    0.38
   5  -2  -2   13.02    0.47
   5   2   2   13.12    0.53
   5  -2  -2   11.58    0.54
   5   2   2   12.55    0.50
  -5   2  -2   14.05    0.48
  -5   2  -2   12.92    0.54
   5   2   2   12.81    0.48
  -5  -2   2   12.77    0.53
  -5  -2  -2   13.55    0.49
   5   2  -2   12.94    0.48
   5   2  -2   13.24    0.51
   5   2  -2   13.20    0.49
  -5  -2  -2   12.47    0.50
   5  -2   2   13.41    0.52
  -5   2   2   13.44    0.54
   5  -2   2   12.59    0.55
   6  -2  -2    1.27    0.16
   6   2   2    1.54    0.18
   6  -2  -2    1.53    0.21
  -6   2  -2    2.08    0.22
   6   2   2    1.38    0.19
  -6  -2   2    1.13    0.19
   6   2   2    1.86    0.17
   6  -2   2    1.58    0.22
   6   2  -2    2.13    0.18
   6   2  -2    1.70    0.17
  -6  -2  -2    1.58    0.19
   6   2  -2    1.42    0.19
  -6   2   2    1.63    0.21
   6  -2   2    1.96    0.21
  -7  -2   2    0.57    0.17
   7  -2  -2    0.52    0.15
   7   2   2    0.53    0.16
   7   2   2    0.39    0.16
  -7   2  -2    0.66    0.17
   7  -2  -2    0.71    0.15
  -7  -2  -2    0.82    0.17
   7   2  -2    0.28    0.13
  -7   2   2    0.54    0.17
   7   2  -2    0.59    0.16
   7  -2   2    0.45    0.16
   7  -2   2    0.69    0.18
   8  -2  -2   34.15    1.14
  -8  -2   2   34.38    1.24
   8   2   2   32.24    1.22
   8   2   2   35.30    1.18
   8  -2  -2   34.31    1.27
  -8   2  -2   33.48    1.22
   8  -2   2   33.78    1.27
   8  -2   2   34.46    1.19
   8   2  -2   35.21    1.23
  -8  -2  -2   34.44    1.22
  -8   2   2   33.99    1.25
   8   2  -2   34.91    1.16
  -9  -2   2    0.01    0.21
  -9   2  -2    0.04    0.19
   9  -2  -2   -0.13    0.18
   9   2   2    0.01    0.18
   9  -2  -2   -0.01    0.17
   9   2   2   -0.17    0.17
   9   2  -2    0.04    0.16
  -9  -2  -2    0.17    0.20
   9   2  -2    0.42    0.21
   9  -2   2   -0.02    0.19
  -9   2   2   -0.08    0.19
   9  -2   2   -0.09    0.17
  10   2   2    3.21    0.42
  10  -2  -2    3.57    0.36
  10  -2  -2    3.18    0.42
 -10   2  -2    3.17    0.41
 -10  -2   2    4.23    0.46
  10   2  -2    3.42    0.36
 -10   2   2    2.44    0.36
 -10  -2  -2    3.85    0.41
  10  -2   2    3.26    0.36
  10  -2   2    3.51    0.43
  10   2  -2    3.29    0.40
  11  -2  -2    0.06    0.27
  11   2   2    0.05    0.25
  11  -2  -2    0.13    0.22
 -11  -2   2   -0.78    0.26
 -11   2  -2   -0.06    0.26
 -11   2   2    0.19    0.27
 -11  -2  -2   -0.50    0.29
  11  -2   2    0.17    0.27
  11   2  -2   -0.39    0.26
  11   2  -2   -0.03    0.22
   0   2   3   72.96    2.09
   0   2   3   78.10    2.02
   0  -2  -3   76.28    2.00
   0   2  -3   77.60    2.14
   0   2   3   73.62    2.12
   0   2  -3   78.22    2.07
   0  -2  -3   74.10    2.00
   0   2  -3   75.29    2.02
   1  -2  -3  219.31    5.66
   1   2   3  220.04    5.95
   1   2   3  210.63    5.81
  -1   2  -3  219.42    5.68
  -1   2  -3  224.66    5.78
   1  -2  -3  215.60    5.66
  -1   2  -3  214.99    5.93
  -1   2   3  222.43    5.95
   1   2  -3  211.15    5.69
   1  -2   3  222.78    5.80
  -1   2   3  217.69    5.84
   1   2  -3  212.99    5.80
  -1  -2  -3  221.92    5.70
   1   2  -3  212.41    5.97
   1  -2   3  228.66    5.72
   2  -2  -3   69.22    1.78
   2  -2  -3   68.80    1.78
  -2  -2   3   64.59    1.89
   2   2   3   67.11    1.92
  -2   2  -3   67.96    1.89
   2   2   3   65.12    1.89
  -2   2  -3   66.12    1.83
  -2   2  -3   68.80    1.90
   2   2   3   68.58    1.83
  -2   2   3   71.51    1.98
  -2  -2  -3   71.79    1.90
   2   2  -3   71.38    1.90
   2  -2   3   72.71    1.96
  -2   2   3   70.16    1.95
   2   2  -3   68.53    1.92
  -2   2   3   68.26    1.99
   2   2  -3   71.85    2.03
   2  -2   3   71.90    1.94
   3   2   3   30.65    0.96
   3   2   3   29.95    0.95
  -3   2  -3   31.30    0.91
  -3  -2   3   31.67    0.97
   3   2   3   30.69    0.92
  -3   2  -3   30.72    0.96
   3  -2  -3   31.54    0.85
   3   2  -3   32.68    0.96
  -3  -2  -3   32.86    0.96
   3   2  -3   31.79    1.01
   3   2  -3   34.43    0.94
  -3   2   3   31.63    0.95
   3  -2   3   35.50    0.99
  -3   2   3   32.15    1.00
   3   2  -3   32.39    0.94
  -3  -2  -3   33.01    0.95
   3  -2   3   32.78    1.01
   4   2   3   47.39    1.49
   4   2   3   49.93    1.44
  -4   2  -3   51.42    1.43
   4  -2  -3   50.53    1.37
  -4   2  -3   49.47    1.42
   4  -2  -3   52.99    1.53
   4   2   3   48.59    1.47
  -4   2  -3   49.94    1.50
   4  -2  -3   49.18    1.39
  -4  -2   3   51.52    1.51
   4   2  -3   50.30    1.49
  -4  -2  -3   51.04    1.43
   4   2  -3   48.28    1.40
   4  -2   3   49.46    1.50
   4   2  -3   47.94    1.45
   4  -2   3   50.71    1.46
  -4   2   3   48.24    1.48
  -4  -2  -3   52.32    1.45
  -4   2   3   52.45    1.41
   5   2   3    0.58    0.13
   5   2   3    0.57    0.11
  -5   2  -3    0.58    0.11
   5  -2  -3    0.28    0.11
  -5   2  -3    0.52    0.07
  -5   2  -3    0.49    0.13
   5   2   3    0.53    0.12
  -5  -2   3    0.44    0.13
   5  -2  -3    0.40    0.09
   5  -2   3    0.49    0.13
   5   2  -3    0.44    0.11
   5   2  -3    0.43    0.10
   5  -2   3    0.43    0.14
   5   2  -3    0.44    0.11
  -5  -2  -3    0.53    0.13
  -5   2   3    0.45    0.13
  -5  -2  -3    0.51    0.11
   6   2   3   18.34    0.73
  -6  -2   3   19.30    0.76
   6  -2  -3   18.53    0.76
  -6   2  -3   19.66    0.75
   6   2   3   18.97    0.66
   6   2   3   18.99    0.70
   6  -2  -3   19.33    0.66
   6  -2   3   18.60    0.75
   6   2  -3   18.82    0.66
   6   2  -3   19.43    0.72
   6  -2   3   19.57    0.72
   6   2  -3   17.93    0.65
  -6  -2  -3   18.63    0.69
  -6   2   3   18.67    0.74
   7  -2  -3   10.24    0.46
   7  -2  -3   10.44    0.56
   7   2   3   10.79    0.52
   7   2   3   10.71    0.54
  -7   2  -3   10.97    0.54
  -7  -2   3   11.95    0.57
   7  -2   3    9.35    0.52
  -7  -2  -3   10.16    0.49
   7   2  -3   10.57    0.47
   7  -2   3   10.50    0.51
  -7   2   3   10.69    0.54
   7   2  -3   10.02    0.50
   8  -2  -3    8.91    0.45
   8   2   3    8.21    0.51
   8  -2  -3    9.91    0.56
  -8   2  -3    8.62    0.52
   8   2   3    8.85    0.49
  -8  -2   3    8.41    0.52
   8  -2   3    9.78    0.56
   8  -2   3    9.89    0.52
  -8  -2  -3    8.42    0.49
   8   2  -3    9.25    0.47
  -8   2   3    9.18    0.53
   8   2  -3    9.67    0.53
   9   2   3    6.22    0.47
  -9   2  -3    5.74    0.46
  -9  -2   3    6.26    0.48
   9  -2  -3    5.95    0.50
   9  -2  -3    6.26    0.40
  -9  -2  -3    5.68    0.44
   9   2  -3    6.63    0.47
   9  -2   3    6.65    0.46
  -9   2   3    5.50    0.47
   9   2  -3    6.72    0.42
   9  -2   3    5.87    0.47
 -10   2  -3    8.62    0.60
  10  -2  -3    9.00    0.63
  10  -2  -3   10.22    0.55
 -10  -2   3    8.88    0.63
  10   2   3    9.31    0.60
 -10   2   3   10.38    0.66
  10   2  -3   10.01    0.56
  10   2  -3    9.95    0.64
  10  -2   3   10.08    0.66
  10  -2   3    9.62    0.59
 -10  -2  -3    9.14    0.60
  11  -2  -3    1.55    0.38
  11   2   3    0.81    0.31
 -11   2  -3    1.18    0.36
 -11  -2   3    0.60    0.35
  11  -2  -3    0.66    0.24
  11  -2   3    1.05    0.35
 -11   2   3    0.95    0.33
  11   2  -3    1.42    0.37
  11   2  -3    0.91    0.29
   0   2  -4   13.32    0.41
   0   2  -4   12.38    0.46
   0   2   4   12.47    0.37
   0   2   4   12.27    0.46
   0  -2  -4   12.93    0.39
   0   2   4   12.58    0.45
   0  -2  -4   14.21    0.39
   0   2  -4   12.60    0.44
  -1   2  -4   42.52    1.22
   1  -2  -4   39.80    1.12
  -1   2  -4   43.13    1.24
   1  -2  -4   42.15    1.12
  -1   2  -4   42.51    1.18
   1   2   4   43.18    1.25
  -1   2   4   45.09    1.30
   1   2  -4   43.50    1.21
   1  -2   4   43.25    1.24
   1  -2   4   45.58    1.23
  -1  -2  -4   42.21    1.21
   1   2  -4   45.63    1.28
  -1   2   4   45.64    1.23
  -1   2   4   44.54    1.30
   1   2  -4   44.51    1.32
  -2   2  -4   22.07    0.72
   2  -2  -4   22.58    0.61
   2   2   4   22.96    0.73
  -2   2  -4   22.08    0.68
  -2   2  -4   23.19    0.71
   2   2   4   21.99    0.73
   2   2   4   22.73    0.67
   2  -2  -4   21.51    0.60
   2   2  -4   24.18    0.68
   2   2  -4   23.11    0.67
  -2   2   4   23.76    0.72
  -2   2   4   23.59    0.72
   2   2  -4   22.91    0.67
   2  -2   4   22.49    0.71
   2  -2   4   23.47    0.72
  -2   2   4   22.71    0.75
  -2  -2  -4   24.09    0.66
   2   2  -4   22.87    0.76
   3  -2  -4   44.01    1.19
  -3   2  -4   43.40    1.32
   3  -2  -4   45.63    1.19
  -3   2  -4   44.85    1.27
  -3  -2   4   42.96    1.33
   3   2   4   44.65    1.27
  -3   2  -4   45.21    1.30
   3   2   4   44.34    1.32
   3   2   4   43.24    1.32
   3   2  -4   43.00    1.26
  -3   2   4   43.48    1.30
  -3  -2  -4   43.90    1.26
   3  -2   4   45.23    1.29
  -3   2   4   44.84    1.34
  -3  -2  -4   45.61    1.25
  -3   2   4   46.01    1.28
   3   2  -4   43.35    1.23
   3   2  -4   44.36    1.34
   3   2  -4   43.85    1.22
   3  -2   4   44.17    1.31
   4   2   4   44.83    1.33
  -4   2  -4   43.89    1.35
   4   2   4   43.12    1.29
   4   2   4   43.52    1.34
   4  -2  -4   43.11    1.37
   4  -2  -4   43.75    1.20
   4  -2  -4   44.66    1.22
  -4   2  -4   45.47    1.28
  -4  -2   4   42.49    1.35
   4  -2   4   46.54    1.34
   4   2  -4   44.97    1.26
  -4   2   4   46.13    1.37
  -4  -2  -4   44.77    1.31
   4  -2   4   44.55    1.37
   4   2  -4   44.70    1.37
  -4   2   4   46.28    1.29
  -4  -2  -4   45.94    1.31
   4   2  -4   43.84    1.27
   4   2  -4   43.06    1.32
   5  -2  -4   15.70    0.52
   5   2   4   15.67    0.58
  -5   2  -4   16.47    0.57
  -5   2  -4   16.16    0.63
   5   2   4   16.03    0.58
   5   2   4   15.46    0.62
  -5   2  -4   15.04    0.51
   5  -2  -4   16.62    0.66
  -5  -2   4   15.55    0.64
   5   2  -4   17.06    0.63
  -5  -2  -4   17.28    0.61
   5   2  -4   16.72    0.58
  -5  -2  -4   16.96    0.61
   5   2  -4   18.19    0.63
  -5   2   4   16.52    0.66
   5  -2   4   16.55    0.64
   5  -2   4   17.89    0.67
   6  -2  -4   42.88    1.44
   6   2   4   43.16    1.33
  -6  -2   4   43.85    1.43
   6   2   4   44.67    1.35
   6  -2  -4   43.46    1.28
   6   2   4   42.74    1.40
  -6   2  -4   43.68    1.41
   6  -2   4   44.67    1.46
  -6   2   4   44.94    1.45
   6  -2   4   45.70    1.41
  -6  -2  -4   42.30    1.38
   6   2  -4   47.94    1.40
   6   2  -4   44.93    1.41
   6   2  -4   44.45    1.33
   7  -2  -4   12.09    0.50
  -7  -2   4   12.86    0.62
  -7   2  -4   12.00    0.58
   7  -2  -4   11.31    0.61
   7   2   4   12.54    0.59
   7   2   4   13.65    0.58
   7   2  -4   13.35    0.60
   7  -2   4   13.56    0.60
  -7  -2  -4   12.32    0.56
   7  -2   4   13.94    0.64
  -7   2   4   12.62    0.61
   7   2  -4   13.22    0.54
   8   2   4    3.25    0.33
   8  -2  -4    3.24    0.35
   8  -2  -4    3.19    0.27
  -8   2  -4    2.93    0.32
  -8  -2   4    2.69    0.32
   8  -2   4    3.45    0.36
   8   2  -4    2.98    0.31
  -8   2   4    2.71    0.34
  -8  -2  -4    3.42    0.33
   8   2  -4    3.08    0.28
   8  -2   4    3.08    0.32
  -9  -2   4    3.15    0.38
   9   2   4    3.45    0.38
  -9   2  -4    3.77    0.39
   9  -2  -4    3.99    0.33
   9  -2  -4    3.62    0.40
   9  -2   4    3.89    0.40
   9   2  -4    3.42    0.31
  -9   2   4    3.54    0.39
  -9  -2  -4    3.41    0.37
   9   2  -4    4.71    0.41
 -10   2  -4    6.20    0.52
  10  -2  -4    4.92    0.40
  10   2   4    4.66    0.47
  10  -2  -4    6.29    0.55
 -10  -2   4    6.52    0.56
  10   2  -4    5.56    0.50
  10  -2   4    5.24    0.50
  10   2  -4    5.57    0.43
 -10   2   4    4.90    0.48
  11  -2  -4    0.01    0.29
  11   2   4    0.20    0.26
  11  -2  -4   -0.01    0.22
 -11   2  -4    0.01    0.30
 -11  -2   4   -0.34    0.28
  11   2  -4   -0.07    0.25
  11  -2   4   -0.19    0.27
  11   2  -4    0.17    0.30
 -11   2   4    0.10    0.26
   0  -2  -5   97.36    2.56
   0  -2  -5   98.91    2.54
   0   2   5   95.47    2.71
   0   2  -5   95.38    2.64
   0   2  -5   93.50    2.72
   0  -2   5  100.94    2.58
   0   2  -5   96.54    2.56
   0  -2  -5   92.64    2.53
   0   2   5   96.07    2.67
   1   2   5  181.25    4.92
   1   2   5  181.78    5.02
   1  -2  -5  184.19    4.74
  -1   2  -5  174.95    4.78
  -1   2  -5  181.07    5.02
   1  -2  -5  184.16    4.74
  -1   2  -5  187.16    4.88
   1  -2   5  181.27    4.86
  -1  -2  -5  186.18    4.84
   1   2  -5  190.83    4.80
  -1   2   5  177.89    4.94
   1   2  -5  177.88    4.90
  -1   2   5  187.16    4.86
  -1  -2  -5  178.93    4.79
  -1   2   5  185.99    5.04
   1   2  -5  181.87    5.06
   1   2  -5  184.12    4.78
   2   2   5  105.70    3.02
  -2   2  -5  109.77    3.02
   2   2   5  107.34    2.98
  -2   2  -5  107.39    2.88
  -2   2  -5  106.89    2.95
   2   2  -5  109.63    2.91
  -2   2   5  106.32    3.00
   2   2  -5  102.35    3.06
  -2  -2  -5  110.82    2.88
  -2   2   5  111.18    2.95
   2  -2   5  111.13    2.92
   2   2  -5  108.44    2.98
   2  -2   5  109.39    2.95
  -2   2   5  105.98    3.03
  -2  -2  -5  108.91    2.90
   2   2  -5  105.28    2.86
   2   2  -5  112.13    2.88
   3  -2  -5  194.13    5.13
  -3   2  -5  197.96    5.31
  -3  -2   5  195.82    5.33
   3   2   5  202.22    5.20
   3   2   5  197.12    5.34
   3   2   5  195.34    5.43
   3  -2  -5  194.57    5.12
  -3   2  -5  199.04    5.20
  -3   2   5  190.81    5.37
   3   2  -5  200.21    5.18
   3  -2   5  201.57    5.25
  -3   2   5  199.91    5.32
  -3   2   5  198.85    5.43
   3   2  -5  198.22    5.48
  -3  -2  -5  187.66    5.22
  -3  -2  -5  201.88    5.25
   3  -2   5  193.31    5.33
   3   2  -5  197.58    5.29
   3   2  -5  209.01    5.18
  -4  -2   5    6.21    0.35
   4  -2  -5    6.90    0.25
   4  -2  -5    6.99    0.36
  -4   2  -5    6.30    0.30
   4   2   5    7.13    0.33
  -4   2  -5    6.83    0.35
   4   2   5    6.45    0.32
   4   2   5    6.83    0.35
   4  -2  -5    6.96    0.24
   4   2  -5    6.63    0.28
   4  -2   5    7.56    0.35
  -4  -2  -5    6.37    0.31
   4  -2   5    6.84    0.34
   4   2  -5    7.19    0.28
  -4   2   5    6.69    0.34
   4   2  -5    6.90    0.31
  -4  -2  -5    7.58    0.31
   4   2  -5    7.53    0.35
   5   2   5   24.64    0.89
   5   2   5   26.11    0.85
   5  -2  -5   24.78    0.92
  -5   2  -5   26.15    0.83
  -5   2  -5   25.66    0.80
  -5   2  -5   24.32    0.88
   5  -2  -5   24.45    0.76
   5   2   5   26.85    0.85
  -5  -2   5   24.35    0.91
   5  -2   5   24.93    0.87
   5  -2   5   24.98    0.89
   5   2  -5   24.65    0.79
  -5   2   5   26.04    0.91
  -5  -2  -5   27.24    0.84
   5   2  -5   25.99    0.86
   5   2  -5   25.34    0.87
  -5  -2  -5   26.12    0.84
  -6  -2   5    8.44    0.47
  -6   2  -5    7.28    0.43
   6  -2  -5    8.22    0.35
   6   2   5    8.29    0.44
   6  -2  -5    8.04    0.46
   6   2   5    8.84    0.39
   6   2   5    8.53    0.42
   6   2  -5    8.41    0.43
   6   2  -5    8.64    0.38
   6  -2   5    8.59    0.45
  -6  -2  -5    9.41    0.42
  -6   2   5    8.64    0.47
   6  -2   5    9.28    0.47
   6   2  -5    9.60    0.42
  -7  -2   5    5.59    0.41
   7  -2  -5    6.22    0.44
   7  -2  -5    7.02    0.35
  -7   2  -5    7.49    0.44
   7   2   5    6.98    0.43
  -7   2   5    6.89    0.45
   7  -2   5    7.27    0.45
  -7  -2  -5    7.28    0.40
   7  -2   5    7.68    0.44
   7   2  -5    6.47    0.41
   7   2  -5    7.15    0.37
  -8   2  -5    8.02    0.49
   8  -2  -5    8.30    0.53
  -8  -2   5    8.80    0.54
   8  -2  -5    8.02    0.42
   8   2   5    8.20    0.51
  -8   2   5    9.07    0.55
   8   2  -5    9.47    0.51
   8   2  -5    8.40    0.45
  -8  -2  -5    9.48    0.50
   8  -2   5    8.62    0.54
  -9   2  -5    1.11    0.26
   9  -2  -5    0.96    0.28
  -9  -2   5    0.36    0.24
   9   2   5    1.10    0.26
   9  -2  -5    1.43    0.22
   9   2  -5    1.24    0.22
   9   2  -5    0.87    0.25
   9  -2   5    0.81    0.26
  -9   2   5    1.26    0.28
  10   2   5    0.42    0.24
 -10  -2   5    0.57    0.30
  10  -2  -5    0.63    0.21
  10  -2  -5    0.13    0.25
 -10   2  -5    0.25    0.25
  10   2  -5    0.76    0.30
  10   2  -5    0.69    0.23
  10  -2   5    0.11    0.25
 -10   2   5    0.60    0.28
 -11  -2   5    1.91    0.39
  11  -2  -5    2.04    0.30
  11  -2  -5    2.27    0.42
  11   2   5    1.27    0.34
 -11   2  -5    2.31    0.41
  11  -2   5    2.15    0.38
  11   2  -5    1.80    0.33
 -11   2   5    1.60    0.39
   0   2  -6    3.49    0.22
   0   2   6    3.43    0.22
   0   2  -6    3.56    0.18
   0   2   6    3.18    0.21
   0  -2  -6    3.39    0.15
   0  -2   6    3.59    0.15
   0  -2  -6    3.40    0.15
   0  -2  -6    3.51    0.16
   0   2  -6    3.55    0.21
   1  -2  -6   17.82    0.51
   1   2   6   19.20    0.65
  -1   2  -6   18.56    0.65
  -1   2  -6   18.35    0.63
   1   2   6   17.96    0.64
   1  -2  -6   18.86    0.51
  -1  -2   6   19.27    0.53
  -1   2  -6   17.77    0.58
   1  -2   6   19.22    0.58
  -1  -2  -6   18.36    0.58
  -1   2   6   19.27    0.65
  -1  -2  -6   18.34    0.55
  -1   2   6   18.09    0.65
  -1  -2  -6   18.75    0.59
  -1   2   6   20.46    0.60
   1   2  -6   19.39    0.68
   1   2  -6   19.51    0.65
   1   2  -6   20.32    0.59
   1   2  -6   18.74    0.57
  -2   2  -6   34.70    1.05
   2   2   6   34.05    1.07
  -2   2  -6   34.15    1.00
   2   2   6   32.91    1.06
  -2   2   6   33.51    1.07
   2  -2   6   35.44    1.02
   2   2  -6   35.20    0.97
   2  -2   6   34.73    1.01
  -2   2   6   35.18    1.03
   2   2  -6   35.34    1.07
   2   2  -6   35.62    0.98
  -2  -2  -6   30.84    0.99
   2   2  -6   32.10    1.09
  -2  -2  -6   35.70    0.96
  -2   2   6   34.99    1.06
   2   2  -6   34.34    0.96
  -3   2  -6   27.28    0.84
   3   2   6   27.39    0.90
  -3   2  -6   26.60    0.88
   3   2   6   26.91    0.84
   3   2   6   27.45    0.89
  -3  -2   6   26.90    0.91
   3  -2   6   27.99    0.88
  -3   2   6   28.61    0.89
  -3  -2  -6   27.98    0.82
   3  -2   6   27.81    0.88
   3   2  -6   27.79    0.84
   3   2  -6   28.38    0.81
  -3   2   6   29.29    0.93
  -3   2   6   27.76    0.89
   3   2  -6   27.38    0.93
  -3  -2  -6   26.68    0.85
   3   2  -6   26.04    0.80
   3  -2   6   28.61    0.89
   4  -2  -6   54.08    1.41
   4   2   6   53.68    1.54
  -4  -2   6   51.45    1.62
  -4   2  -6   53.89    1.53
   4   2   6   51.27    1.59
  -4   2  -6   52.73    1.59
   4  -2   6   54.98    1.63
   4   2  -6   57.74    1.52
   4  -2   6   54.84    1.61
  -4   2   6   55.78    1.65
  -4  -2  -6   54.54    1.58
  -4  -2  -6   55.21    1.56
   4   2  -6   53.68    1.67
   4   2  -6   53.60    1.52
   4   2  -6   56.47    1.59
   4  -2   6   52.49    1.61
  -4   2   6   54.40    1.60
   5   2   6   47.44    1.42
   5  -2  -6   43.91    1.27
   5  -2  -6   44.75    1.47
  -5   2  -6   45.38    1.37
  -5  -2   6   46.70    1.48
  -5   2  -6   45.56    1.43
   5   2   6   45.40    1.45
   5   2  -6   48.22    1.35
   5  -2   6   47.92    1.45
  -5  -2  -6   46.83    1.39
   5   2  -6   47.00    1.47
  -5   2   6   45.73    1.48
  -5  -2  -6   44.99    1.40
   5  -2   6   47.16    1.47
   5   2  -6   47.62    1.42
  -6   2  -6    8.52    0.45
   6   2   6    8.50    0.46
  -6  -2   6    8.37    0.48
   6  -2  -6    8.68    0.35
   6  -2  -6    9.02    0.49
   6   2   6    8.66    0.41
   6   2  -6    8.36    0.42
   6   2  -6    8.54    0.42
  -6  -2  -6    9.13    0.42
   6  -2   6    8.51    0.46
  -6   2   6    7.65    0.45
   6  -2   6    8.46    0.45
   6   2  -6    8.51    0.37
   7  -2  -6    7.46    0.48
   7  -2  -6    7.46    0.35
  -7  -2   6    7.45    0.48
   7   2   6    7.01    0.44
  -7   2  -6    7.27    0.44
   7   2  -6    7.84    0.44
   7  -2   6    7.87    0.47
   7   2  -6    7.47    0.37
  -7   2   6    7.25    0.47
  -7  -2  -6    7.64    0.42
   8  -2  -6    6.24    0.36
   8  -2  -6    7.70    0.51
  -8   2  -6    6.38    0.45
   8   2   6    6.77    0.47
  -8  -2   6    6.83    0.49
   8   2  -6    7.59    0.47
   8  -2   6    6.67    0.48
   8   2  -6    7.45    0.40
  -8   2   6    7.01    0.49
   9  -2  -6    2.97    0.28
  -9  -2   6    3.18    0.39
   9  -2  -6    3.18    0.40
   9   2   6    3.28    0.38
  -9   2  -6    3.09    0.36
   9   2  -6    3.82    0.33
  -9   2   6    3.11    0.40
   9  -2   6    2.74    0.35
  10  -2  -6    1.81    0.37
  10   2   6    1.21    0.32
 -10   2  -6    1.15    0.31
  10  -2  -6    1.68    0.27
 -10  -2   6    1.56    0.37
 -10   2   6    1.73    0.34
  10   2  -6    2.18    0.30
  10  -2   6    2.08    0.35
 -11   2  -6   -0.42    0.27
  11  -2  -6    0.25    0.31
   0  -2   7   49.28    1.29
   0   2   7   47.56    1.42
   0  -2  -7   46.25    1.27
   0   2  -7   46.01    1.31
   0  -2  -7   45.72    1.26
   0   2  -7   44.17    1.37
   0   2  -7   45.63    1.30
   0   2  -7   45.43    1.44
   0  -2  -7   47.45    1.29
   0   2   7   46.73    1.40
   1  -2  -7   42.51    1.10
  -1   2  -7   38.99    1.17
  -1  -2   7   44.66    1.14
   1   2   7   40.05    1.27
  -1   2  -7   40.71    1.29
   1  -2  -7   39.95    1.09
  -1   2  -7   38.17    1.22
   1   2   7   41.30    1.27
  -1  -2  -7   42.29    1.15
   1  -2   7   42.62    1.18
  -1   2   7   37.39    1.25
   1   2  -7   40.25    1.25
  -1  -2  -7   41.56    1.17
   1   2  -7   42.16    1.31
   1   2  -7   39.70    1.16
  -1   2   7   41.95    1.28
  -1  -2  -7   42.69    1.19
  -1   2   7   42.76    1.20
   1   2  -7   43.43    1.18
   2   2   7   10.70    0.45
  -2   2  -7   11.28    0.45
   2   2   7   10.16    0.45
  -2   2  -7   10.64    0.40
   2   2  -7   12.01    0.39
   2   2  -7   10.73    0.46
   2   2  -7   11.37    0.49
  -2  -2  -7   11.05    0.40
   2   2  -7   10.69    0.37
  -2   2   7   10.99    0.44
   2  -2   7   11.11    0.43
  -2   2   7   11.12    0.43
  -2   2   7   11.43    0.47
  -2  -2  -7   11.48    0.37
   2  -2   7   10.75    0.45
   2   2  -7   11.25    0.37
   2  -2   7   10.95    0.41
   3   2   7    0.27    0.10
  -3   2  -7    0.31    0.10
  -3   2  -7    0.36    0.11
   3   2   7    0.28    0.10
   3   2  -7    0.39    0.12
   3   2  -7    0.44    0.10
  -3  -2  -7    0.34    0.09
  -3   2   7    0.40    0.11
   3  -2   7    0.44    0.10
  -3  -2  -7    0.43    0.08
   3   2  -7    0.37    0.08
   3   2  -7    0.39    0.07
  -3   2   7    0.26    0.11
   3  -2   7    0.24    0.09
   3  -2   7    0.33    0.11
   3   2  -7    0.54    0.13
  -3   2   7    0.36    0.10
  -4   2  -7   31.64    0.98
   4   2   7   29.89    1.02
   4  -2  -7   31.40    0.83
   4   2   7   30.16    1.04
  -4   2  -7   30.67    1.03
  -4  -2   7   32.01    1.07
  -4   2   7   33.15    1.08
   4   2  -7   33.47    0.94
  -4  -2  -7   31.88    0.97
  -4  -2  -7   31.91    1.01
  -4   2   7   31.32    1.06
   4   2  -7   32.56    1.08
   4   2  -7   31.13    0.99
  -4   2   7   32.94    1.02
   4  -2   7   31.99    1.03
   4  -2   7   32.79    1.04
   4  -2   7   31.71    1.03
   5   2   7   39.97    1.31
   5  -2  -7   38.47    1.11
   5  -2  -7   39.30    1.32
  -5  -2   7   39.83    1.34
  -5   2  -7   40.94    1.24
   5  -2  -7   40.98    1.10
   5   2   7   39.18    1.27
  -5   2  -7   40.25    1.30
   5   2  -7   40.82    1.20
  -5  -2  -7   40.82    1.27
   5  -2   7   40.17    1.27
   5  -2   7   41.71    1.33
   5   2  -7   42.28    1.28
   5   2  -7   42.14    1.34
  -5  -2  -7   42.72    1.25
  -5   2   7   40.31    1.34
   6  -2  -7   70.76    1.95
  -6  -2   7   70.93    2.19
   6   2   7   70.18    2.17
  -6   2  -7   70.01    2.14
   6   2   7   73.50    2.13
   6  -2  -7   68.63    2.18
   6  -2   7   74.27    2.24
   6   2  -7   73.25    2.07
  -6   2   7   71.33    2.24
   6   2  -7   73.31    2.18
   6   2  -7   77.63    2.24
  -7   2  -7   12.32    0.61
   7   2   7   12.59    0.63
  -7  -2   7   12.17    0.64
   7  -2  -7   12.80    0.66
   7  -2  -7   12.83    0.49
   7   2  -7   14.31    0.62
   7  -2   7   13.99    0.66
   7   2  -7   13.01    0.53
  -7   2   7   12.93    0.66
   8   2   7    6.06    0.45
   8  -2  -7    5.39    0.33
  -8   2  -7    5.76    0.43
   8  -2  -7    6.01    0.48
  -8  -2   7    5.17    0.47
   8   2  -7    5.73    0.35
   8  -2   7    6.06    0.45
  -8   2   7    5.76    0.46
  -9   2  -7    1.77    0.31
   9  -2  -7    2.67    0.27
   9  -2  -7    2.11    0.35
  -9  -2   7    2.49    0.37
   9   2   7    2.10    0.33
  -9   2   7    2.41    0.37
   9   2  -7    2.71    0.28
   9  -2   7    2.04    0.32
  10   2   7    1.01    0.29
 -10  -2   7    0.80    0.31
  10  -2  -7    0.80    0.22
  10  -2  -7    1.22    0.33
 -10   2  -7    0.47    0.28
 -10   2   7    0.51    0.28
  10  -2   7    0.83    0.28
  10   2  -7    0.66    0.23
  11  -2  -7    2.24    0.47
 -11   2  -7    3.10    0.46
   0   2  -8    5.78    0.28
   0   2  -8    5.74    0.26
   0  -2  -8    5.80    0.23
   0   2   8    5.90    0.31
   0  -2  -8    6.05    0.24
   0   2   8    5.83    0.31
   0  -2   8    5.82    0.24
   0   2  -8    5.65    0.30
   0   2  -8    6.04    0.33
   0  -2  -8    5.92    0.24
   1   2   8    3.36    0.24
  -1  -2   8    3.42    0.16
   1  -2  -8    3.01    0.13
   1   2   8    3.13    0.23
  -1   2  -8    3.42    0.20
   1  -2  -8    3.12    0.18
  -1   2  -8    3.23    0.22
  -1   2   8    3.56    0.24
  -1  -2  -8    3.16    0.16
  -1   2   8    3.12    0.23
   1   2  -8    3.11    0.22
   1  -2   8    3.38    0.18
   1   2  -8    3.03    0.24
   1   2  -8    3.20    0.17
  -1  -2  -8    2.96    0.17
  -1  -2  -8    3.03    0.20
   1   2  -8    3.51    0.20
   2   2   8    6.38    0.34
   2   2   8    6.28    0.35
  -2   2  -8    6.98    0.31
  -2   2  -8    6.68    0.34
  -2   2   8    7.21    0.33
   2   2  -8    6.87    0.37
   2  -2   8    6.79    0.34
   2   2  -8    7.22    0.27
   2  -2   8    7.51    0.31
  -2   2   8    7.27    0.35
   2   2  -8    7.29    0.36
  -2   2   8    6.60    0.35
  -2  -2  -8    7.45    0.27
  -2  -2  -8    6.73    0.30
   2   2  -8    7.22    0.29
  -3   2  -8   63.47    1.82
   3   2   8   62.86    1.92
   3   2   8   65.81    1.92
  -3   2  -8   63.96    1.89
   3  -2   8   63.75    1.96
  -3  -2  -8   64.44    1.86
   3  -2   8   66.54    1.90
   3   2  -8   64.97    1.96
  -3   2   8   64.20    1.96
  -3  -2  -8   70.14    1.84
  -3   2   8   63.79    1.92
  -3   2   8   66.25    1.97
   3   2  -8   69.09    1.86
   3   2  -8   70.09    1.82
   3   2  -8   65.96    1.80
   3   2  -8   65.70    2.01
   4   2   8    2.24    0.21
   4   2   8    1.89    0.22
  -4   2  -8    1.77    0.19
  -4  -2   8    1.94    0.23
  -4   2  -8    2.09    0.22
  -4   2   8    2.41    0.21
   4   2  -8    2.41    0.19
   4   2  -8    2.15    0.15
   4  -2   8    2.31    0.20
   4  -2   8    2.01    0.20
   4   2  -8    2.31    0.23
  -4   2   8    2.12    0.22
  -4   2   8    2.35    0.24
  -4  -2  -8    1.80    0.18
   5  -2  -8    1.56    0.11
   5   2   8    1.63    0.20
   5  -2  -8    1.94    0.24
  -5   2  -8    1.41    0.18
  -5   2  -8    1.51    0.21
  -5  -2   8    1.70    0.24
   5   2   8    2.07    0.24
   5  -2  -8    1.56    0.11
  -5   2   8    1.47    0.21
   5   2  -8    2.06    0.16
   5  -2   8    1.54    0.20
  -5  -2  -8    1.83    0.20
   5   2  -8    1.85    0.23
  -5   2   8    1.78    0.18
   5  -2   8    1.92    0.19
   6   2   8   30.14    1.05
   6   2   8   30.23    1.11
   6  -2  -8   30.18    1.13
   6  -2  -8   31.15    0.90
  -6  -2   8   30.48    1.14
  -6   2  -8   30.69    1.09
  -6   2   8   31.65    1.16
   6   2  -8   32.65    1.00
  -6  -2  -8   34.01    1.10
   6   2  -8   33.57    1.14
   6  -2   8   31.13    1.13
   7   2   8    0.21    0.17
   7  -2  -8    0.44    0.20
   7  -2  -8    0.30    0.12
  -7  -2   8    0.36    0.20
  -7   2  -8    0.46    0.19
   7   2  -8    0.20    0.12
   7  -2   8    0.72    0.22
  -7   2   8    0.74    0.21
  -8  -2   8    1.23    0.29
   8   2   8    1.80    0.29
   8  -2  -8    1.79    0.20
  -8   2  -8    1.69    0.30
   8  -2  -8    1.67    0.30
  -8   2   8    1.24    0.26
   8  -2   8    1.98    0.30
   8   2  -8    1.70    0.22
   9  -2  -8    5.34    0.50
  -9  -2   8    4.89    0.50
   9  -2  -8    5.42    0.35
  -9   2  -8    4.76    0.43
   9   2   8    5.69    0.51
   9  -2   8    5.71    0.49
  -9   2   8    4.97    0.49
   9   2  -8    5.02    0.37
 -10  -2   8    4.30    0.51
  10   2   8    5.54    0.53
 -10   2  -8    5.85    0.53
  10  -2  -8    5.38    0.39
  10  -2  -8    5.98    0.58
 -10   2   8    5.75    0.57
  10   2  -8    4.96    0.40
  10  -2   8    5.86    0.55
   0  -2   9   34.49    0.98
   0   2  -9   31.44    0.98
   0   2  -9   32.92    1.13
   0  -2  -9   32.87    0.95
   0  -2  -9   34.66    0.98
   0   2  -9   31.51    1.06
   0   2   9   31.95    1.10
   0  -2  -9   34.76    0.97
   0   2   9   35.20    1.10
  -1  -2   9   55.77    1.52
  -1   2  -9   54.91    1.55
   1  -2  -9   54.22    1.46
   1  -2  -9   54.44    1.47
  -1   2  -9   54.72    1.63
   1   2   9   53.69    1.66
   1   2   9   53.99    1.68
   1  -2  -9   54.31    1.55
   1   2  -9   53.52    1.52
  -1   2   9   55.82    1.69
   1   2  -9   55.66    1.73
   1   2  -9   55.51    1.64
  -1  -2  -9   52.30    1.53
  -1  -2  -9   53.57    1.52
   1  -2   9   58.20    1.57
   2   2   9   88.32    2.51
  -2   2  -9   83.15    2.42
  -2   2  -9   84.86    2.35
   2   2   9   82.90    2.46
  -2  -2  -9   88.07    2.38
   2   2  -9   83.85    2.35
   2  -2   9   89.11    2.58
  -2   2   9   87.29    2.57
   2  -2   9   90.54    2.45
  -2  -2  -9   86.12    2.40
   2   2  -9   87.91    2.61
  -2   2   9   91.01    2.54
   2   2  -9   84.73    2.50
  -2   2   9   89.66    2.47
  -3   2  -9   32.32    1.01
  -3   2  -9   31.49    1.06
   3   2   9   31.85    1.09
   3   2   9   32.73    1.09
   3  -2   9   34.64    1.13
  -3   2   9   34.98    1.12
   3   2  -9   34.27    1.13
   3   2  -9   32.72    1.16
  -3  -2  -9   34.47    1.05
   3   2  -9   33.41    0.97
  -3   2   9   34.44    1.13
   3  -2   9   33.75    1.07
  -3   2   9   34.60    1.10
  -4   2  -9   71.22    2.11
   4   2   9   70.29    2.14
   4   2   9   71.89    2.16
  -4   2  -9   71.42    2.05
  -4   2   9   72.31    2.14
   4  -2   9   71.03    2.12
   4   2  -9   70.46    2.13
  -4   2   9   70.13    2.11
   4   2  -9   69.32    1.93
  -4  -2  -9   70.51    2.03
   4  -2   9   71.95    2.08
   4   2  -9   71.75    2.18
  -4   2   9   71.19    2.11
   5   2   9    6.55    0.37
  -5  -2   9    7.02    0.44
   5  -2  -9    6.17    0.23
   5  -2  -9    6.00    0.41
   5   2   9    6.37    0.41
  -5   2  -9    6.47    0.39
  -5   2  -9    6.99    0.37
  -5   2   9    6.94    0.35
   5   2  -9    6.08    0.38
  -5   2   9    6.02    0.39
   5  -2   9    6.30    0.34
  -5  -2  -9    5.19    0.33
   5  -2   9    6.14    0.37
   5   2  -9    6.10    0.28
   6   2   9    4.48    0.37
   6  -2  -9    4.32    0.22
   6   2   9    4.94    0.33
  -6   2  -9    4.01    0.33
  -6  -2   9    3.98    0.37
   6  -2  -9    4.75    0.37
   6   2  -9    4.33    0.34
   6   2  -9    4.08    0.25
  -6  -2  -9    4.29    0.31
   6  -2   9    4.37    0.34
  -6   2   9    4.75    0.39
  -7   2  -9    6.92    0.45
   7  -2  -9    7.12    0.33
   7   2   9    7.30    0.48
  -7  -2   9    7.38    0.51
   7  -2  -9    6.96    0.49
  -7   2   9    7.05    0.49
   7   2  -9    7.23    0.36
   7  -2   9    6.95    0.46
   8  -2  -9    5.51    0.49
   8   2   9    5.46    0.45
  -8  -2   9    4.67    0.46
   8  -2  -9    5.02    0.31
  -8   2  -9    5.18    0.44
   8  -2   9    4.68    0.43
   8   2  -9    5.05    0.32
  -8   2   9    4.44    0.45
  -9   2  -9    0.83    0.26
   9   2   9    1.09    0.29
  -9  -2   9    0.84    0.31
   9  -2  -9    1.49    0.33
   9  -2  -9    0.82    0.19
  -9   2   9    0.66    0.30
   9   2  -9    0.83    0.20
   9  -2   9    0.77    0.27
  10  -2  -9    2.00    0.28
 -10   2  -9    2.31    0.38
 -10  -2   9    2.01    0.39
  10  -2  -9    2.73    0.45
  10   2   9    2.05    0.38
 -10   2   9    2.27    0.42
  10  -2   9    1.83    0.38
  10   2  -9    2.86    0.31
   0  -2  10   23.06    0.71
   0   2 -10   21.61    0.79
   0   2  10   22.98    0.83
   0   2  10   21.33    0.81
   0   2 -10   22.52    0.71
   0  -2 -10   22.62    0.71
   0  -2 -10   21.86    0.68
   0   2 -10   23.51    0.87
  -1   2 -10   14.29    0.52
   1  -2 -10   14.18    0.45
   1  -2 -10   14.59    0.51
  -1   2 -10   14.96    0.58
   1   2  10   13.77    0.60
   1  -2 -10   13.70    0.44
   1   2  10   14.63    0.60
   1  -2  10   14.79    0.52
   1   2 -10   14.77    0.57
  -1   2  10   13.38    0.57
   1   2 -10   14.10    0.48
  -1  -2 -10   13.92    0.49
  -1   2  10   13.62    0.58
   1   2 -10   13.58    0.61
   2   2  10   27.42    0.98
  -2   2 -10   26.84    0.94
   2  -2 -10   27.65    0.75
   2  -2 -10   29.44    0.90
  -2   2 -10   25.88    0.88
   2   2  10   28.64    0.99
   2   2 -10   27.30    0.96
  -2   2  10   28.04    0.98
  -2   2  10   27.96    0.97
  -2  -2 -10   26.96    0.87
   2   2 -10   28.03    0.82
   2  -2  10   27.37    0.98
   2   2 -10   28.93    1.02
   2  -2  10   28.78    0.90
   3   2  10   12.44    0.56
  -3   2 -10   13.04    0.55
  -3   2 -10   11.95    0.50
   3   2  10   12.93    0.59
  -3   2  10   13.17    0.56
   3   2 -10   13.17    0.60
   3   2 -10   12.14    0.56
   3   2 -10   12.71    0.43
  -3  -2 -10   13.32    0.51
   3  -2  10   13.28    0.52
  -3   2  10   13.13    0.55
   3  -2  10   12.87    0.56
  -3   2  10   12.89    0.57
   4   2  10   23.74    0.91
   4   2  10   24.54    0.91
  -4   2 -10   23.86    0.84
  -4   2 -10   25.03    0.90
  -4   2  10   25.33    0.91
  -4   2  10   26.45    0.95
   4   2 -10   24.87    0.76
   4  -2  10   26.12    0.91
  -4   2  10   25.01    0.90
   4   2 -10   25.50    0.94
   4   2 -10   24.25    0.95
  -4  -2 -10   24.94    0.86
   4  -2  10   25.89    0.88
   5   2  10    1.20    0.20
  -5   2 -10    1.35    0.21
  -5   2 -10    1.39    0.20
   5  -2 -10    1.01    0.21
   5   2  10    1.04    0.20
   5  -2  10    1.16    0.19
   5  -2  10    1.09    0.19
  -5   2  10    0.95    0.21
  -5   2  10    1.01    0.18
   5   2 -10    1.31    0.24
   5   2 -10    1.29    0.14
  -5  -2 -10    1.06    0.18
  -6  -2  10    7.23    0.50
   6   2  10    7.45    0.43
   6  -2 -10    8.18    0.30
  -6   2 -10    8.17    0.48
   6  -2 -10    8.31    0.50
   6   2  10    7.51    0.47
   6   2 -10    7.48    0.34
   6  -2  10    7.53    0.45
  -6  -2 -10    8.41    0.45
   6   2 -10    7.21    0.45
  -6   2  10    7.78    0.49
   7  -2 -10   12.10    0.66
   7   2  10   12.46    0.66
  -7   2 -10   13.54    0.65
  -7  -2  10   10.68    0.64
   7  -2 -10   12.44    0.46
   7  -2  10   12.65    0.64
  -7   2  10   12.19    0.67
   7   2 -10   12.52    0.50
  -8   2 -10    2.13    0.32
   8  -2 -10    2.30    0.35
  -8  -2  10    1.66    0.31
   8  -2 -10    1.82    0.21
   8   2  10    1.58    0.31
   8   2 -10    1.77    0.22
   8  -2  10    1.56    0.28
  -8   2  10    2.16    0.34
   9  -2 -10    2.73    0.39
   9   2  10    2.81    0.39
  -9  -2  10    2.54    0.39
   9  -2 -10    2.93    0.27
  -9   2 -10    2.50    0.36
   9   2 -10    2.68    0.28
  -9   2  10    2.48    0.40
   9  -2  10    2.49    0.36
  10  -2  10    0.83    0.32
   0   2  11  149.04    4.07
   0   2 -11  141.70    3.88
   0   2  11  142.49    4.17
   0   2 -11  143.13    4.21
   0   2 -11  149.63    4.03
   0  -2 -11  145.17    3.85
  -1   2 -11    3.03    0.22
   1   2  11    3.33    0.28
   1   2  11    3.20    0.28
   1  -2 -11    3.28    0.17
  -1   2 -11    3.43    0.28
   1  -2 -11    3.29    0.22
  -1   2  11    3.26    0.27
  -1  -2 -11    2.98    0.20
   1   2 -11    3.05    0.26
   1   2 -11    3.11    0.29
  -1   2  11    3.34    0.29
   1   2 -11    3.15    0.20
   2   2  11   40.60    1.33
   2  -2 -11   40.28    1.23
   2  -2 -11   41.28    1.09
   2   2  11   40.59    1.34
   2  -2 -11   39.23    1.08
  -2   2 -11   38.54    1.28
  -2   2 -11   38.09    1.21
  -2  -2 -11   39.10    1.19
   2  -2  11   42.13    1.35
  -2   2  11   40.57    1.34
   2  -2  11   41.14    1.24
  -2   2  11   40.89    1.32
   2   2 -11   38.88    1.15
   2   2 -11   37.39    1.36
  -3   2 -11    3.33    0.28
  -3   2 -11    2.91    0.23
   3   2  11    2.55    0.29
   3   2  11    2.79    0.28
  -3   2  11    2.64    0.25
  -3   2  11    2.84    0.25
  -3   2  11    2.26    0.26
   3   2 -11    2.62    0.28
   3   2 -11    2.81    0.27
  -3  -2 -11    2.85    0.22
   3  -2  11    3.22    0.28
   3  -2  11    2.90    0.24
   3   2 -11    2.72    0.17
  -4   2 -11   14.46    0.59
   4   2  11   14.90    0.65
   4   2  11   14.07    0.66
  -4   2 -11   14.90    0.64
  -4  -2 -11   14.40    0.58
  -4   2  11   14.57    0.65
   4   2 -11   13.88    0.48
  -4   2  11   14.06    0.61
  -4   2  11   14.61    0.63
   4  -2  11   13.80    0.61
   4   2 -11   14.44    0.66
   4  -2  11   14.43    0.60
   4   2 -11   14.01    0.64
  -5   2 -11   24.47    0.93
   5  -2 -11   25.16    0.96
   5   2  11   24.89    0.95
  -5   2 -11   24.71    0.89
   5   2  11   23.28    0.96
   5   2 -11   23.79    0.76
  -5   2  11   23.62    0.94
   5   2 -11   24.14    0.95
   5  -2  11   24.95    0.91
  -5   2  11   24.90    0.90
  -5  -2 -11   25.06    0.88
   5  -2  11   24.42    0.91
   5   2 -11   24.49    0.97
   6  -2 -11    3.23    0.35
   6  -2 -11    3.08    0.18
  -6   2 -11    3.03    0.32
   6   2  11    3.19    0.32
   6   2  11    4.24    0.37
   6   2 -11    3.02    0.22
   6   2 -11    3.62    0.35
   6  -2  11    3.37    0.32
  -6  -2 -11    3.17    0.30
  -6   2  11    3.76    0.37
   7   2  11    2.11    0.32
  -7   2 -11    2.47    0.31
  -7  -2  11    2.21    0.36
   7  -2 -11    2.37    0.19
   7  -2 -11    2.19    0.34
   7  -2  11    2.99    0.34
   7   2 -11    2.34    0.21
  -7   2  11    1.81    0.31
   8   2  11    7.20    0.54
  -8   2 -11    6.87    0.50
   8  -2 -11    6.87    0.55
   8  -2 -11    7.37    0.35
  -8  -2  11    7.16    0.57
  -8   2  11    7.25    0.57
   8  -2  11    8.39    0.56
   8   2 -11    8.05    0.41
   9  -2 -11   13.60    0.56
  -9  -2  11   12.17    0.80
   9   2  11   13.89    0.80
  -9   2  11   13.49    0.80
   9   2 -11   13.13    0.58
   9  -2  11   12.46    0.74
   0   2  12    0.20    0.14
   0  -2 -12    0.14    0.08
   0   2  12    0.28    0.16
   0   2 -12    0.14    0.10
   0   2 -12    0.02    0.14
   0   2 -12    0.15    0.14
   1   2  12   13.78    0.63
   1  -2 -12   13.47    0.44
  -1   2 -12   12.84    0.51
   1   2  12   13.39    0.61
  -1   2 -12   14.23    0.59
  -1   2  12   13.10    0.60
  -1  -2 -12   12.92    0.48
  -1   2  12   13.02    0.59
   1   2 -12   12.41    0.47
   1   2 -12   13.78    0.58
   1   2 -12   12.57    0.62
  -2   2 -12   26.95    0.95
   2  -2 -12   26.94    0.74
   2   2  12   27.00    0.99
  -2   2 -12   23.99    0.86
   2   2  12   27.01    0.98
   2  -2 -12   24.85    0.86
   2   2 -12   26.36    0.82
  -2   2  12   26.11    0.98
   2   2 -12   26.16    0.96
   2   2 -12   26.72    1.04
  -2   2  12   26.93    0.97
  -2  -2 -12   26.93    0.86
   2  -2  12   27.90    1.00
   3   2  12    6.57    0.41
  -3   2 -12    6.21    0.35
   3  -2 -12    6.54    0.37
   3   2  12    7.33    0.44
  -3   2 -12    6.26    0.39
   3   2 -12    6.40    0.44
  -3   2  12    6.45    0.40
   3  -2  12    6.76    0.41
   3   2 -12    6.86    0.41
   3  -2  12    7.29    0.38
   3   2 -12    6.67    0.29
  -3  -2 -12    6.95    0.36
  -3   2  12    7.45    0.43
   4   2  12    2.25    0.29
  -4   2 -12    3.52    0.31
   4   2  12    2.77    0.29
  -4   2 -12    2.79    0.27
  -4   2  12    2.37    0.28
   4   2 -12    2.67    0.29
   4  -2  12    2.70    0.29
  -4  -2 -12    2.75    0.25
   4   2 -12    2.24    0.17
   4  -2  12    2.53    0.26
  -4   2  12    2.86    0.29
   4   2 -12    3.35    0.33
  -4   2  12    2.29    0.28
   5   2  12    2.99    0.33
   5  -2 -12    2.82    0.31
   5   2  12    3.31    0.31
  -5   2 -12    3.29    0.29
  -5   2 -12    2.85    0.32
   5   2 -12    2.98    0.34
  -5   2  12    2.74    0.31
   5  -2  12    2.83    0.29
   5   2 -12    2.57    0.31
   5  -2  12    2.76    0.30
   5   2 -12    2.46    0.18
  -5  -2 -12    2.97    0.27
   6   2  12   16.43    0.78
   6   2  12   16.55    0.74
  -6   2 -12   16.15    0.74
   6  -2 -12   16.36    0.76
  -6   2  12   18.48    0.82
   6   2 -12   17.71    0.81
   6   2 -12   16.54    0.78
  -6  -2 -12   17.81    0.73
   6   2 -12   16.88    0.59
   6  -2  12   16.79    0.75
   7   2  12    1.81    0.31
   7  -2 -12    1.74    0.16
   7  -2 -12    1.83    0.33
   7   2 -12    1.87    0.32
  -7   2  12    1.78    0.31
   7  -2  12    1.59    0.29
   7   2 -12    1.58    0.19
   8  -2 -12    0.27    0.14
   8   2  12   -0.24    0.25
   8  -2  12   -0.19    0.24
   8   2 -12    0.28    0.15
  -8   2  12   -0.02    0.25
   9   2  12    0.42    0.30
   9  -2 -12    0.09    0.16
  -9  -2  12    0.24    0.30
   9  -2  12    0.31    0.30
   9   2 -12    0.15    0.19
  -9   2  12    0.19    0.28
   0   2  13   31.27    1.17
   0   2 -13   33.18    1.02
   0  -2 -13   32.80    0.98
   0   2  13   30.97    1.12
   0   2 -13   32.27    1.12
   0   2 -13   33.15    1.23
   1   2  13   22.00    0.87
   1  -2 -13   22.05    0.69
  -1   2 -13   23.03    0.86
  -1   2 -13   22.51    0.94
   1   2  13   22.46    0.90
  -1   2 -13   22.59    0.77
  -1  -2 -13   21.88    0.74
  -1   2  13   21.54    0.89
   1   2 -13   22.07    0.74
   1   2 -13   22.98    0.86
   1   2 -13   22.94    0.95
  -1   2  13   24.62    0.90
   2  -2 -13    9.37    0.33
   2   2  13    9.42    0.52
   2   2  13    9.05    0.51
  -2   2 -13   10.07    0.45
  -2   2 -13   10.09    0.50
  -2   2  13    9.76    0.52
   2   2 -13    9.39    0.38
   2   2 -13    9.38    0.50
  -2  -2 -13   10.05    0.43
   2   2 -13    9.75    0.55
  -2   2  13   10.65    0.53
   3   2  13    6.56    0.43
   3   2  13    6.02    0.42
  -3   2 -13    6.79    0.37
  -3   2 -13    6.05    0.39
   3   2 -13    6.97    0.42
  -3   2  13    6.69    0.43
  -3   2  13    6.80    0.43
  -3  -2 -13    6.33    0.36
   3  -2  13    6.76    0.43
   3   2 -13    5.78    0.43
   3   2 -13    7.13    0.30
   4   2  13   22.84    0.96
   4   2  13   23.81    0.97
   4  -2 -13   24.07    0.90
  -4   2 -13   26.15    0.95
  -4   2 -13   24.09    0.88
   4   2 -13   23.17    0.75
  -4  -2 -13   23.92    0.87
  -4   2  13   24.99    0.95
   4   2 -13   24.37    1.00
   4  -2  13   24.39    0.95
  -4   2  13   25.12    0.96
   4   2 -13   24.32    0.95
   5   2  13    6.68    0.45
   5   2  13    6.75    0.48
  -5   2 -13    6.92    0.45
   5  -2 -13    6.23    0.46
  -5   2 -13    7.04    0.42
   5   2 -13    6.59    0.30
  -5   2  13    7.01    0.46
  -5  -2 -13    6.66    0.41
   5   2 -13    7.02    0.47
   5   2 -13    7.16    0.49
   6   2  13    0.50    0.24
   6   2  13    0.34    0.21
   6  -2  13    0.36    0.21
  -6   2  13    0.49    0.23
   6   2 -13    0.31    0.21
  -6  -2 -13    0.60    0.21
   6   2 -13    0.20    0.20
   6   2 -13    0.47    0.12
   7  -2 -13    1.40    0.14
   7   2  13    1.78    0.34
   7   2 -13    1.40    0.30
  -7   2  13    1.18    0.30
   7  -2  13    1.43    0.31
   7   2 -13    1.59    0.19
   8  -2 -13    4.87    0.28
   8   2  13    4.82    0.49
   8  -2  13    4.97    0.49
  -8   2  13    4.85    0.54
   8   2 -13    4.95    0.32
   8   2 -13    4.70    0.50
   0   2  14    3.45    0.33
   0   2 -14    2.97    0.23
   0   2  14    3.59    0.33
   0   2 -14    3.35    0.31
   0  -2 -14    3.08    0.22
   0   2 -14    3.31    0.36
  -1   2 -14   18.12    0.67
   1   2  14   18.84    0.79
   1  -2 -14   16.79    0.58
   1   2  14   17.21    0.78
  -1   2 -14   18.50    0.75
  -1   2 -14   19.15    0.85
   1   2 -14   19.28    0.76
  -1   2  14   18.05    0.76
   1   2 -14   17.82    0.84
   1   2 -14   17.77    0.63
  -1  -2 -14   18.34    0.64
  -1   2  14   17.62    0.78
   2   2  14   24.60    1.02
  -2   2 -14   28.08    1.00
  -2   2 -14   26.51    0.91
   2  -2 -14   25.21    0.77
   2   2  14   26.79    1.01
   2   2 -14   25.15    1.04
  -2  -2 -14   22.78    0.83
   2   2 -14   25.01    0.95
  -2   2  14   27.11    0.98
  -2   2  14   26.21    1.00
   2   2 -14   24.61    0.80
  -3   2 -14   15.43    0.67
  -3   2 -14   14.63    0.62
   3  -2 -14   13.80    0.44
   3   2  14   13.56    0.68
   3   2  14   14.41    0.70
  -3  -2 -14   14.04    0.58
   3   2 -14   14.07    0.50
   3   2 -14   14.14    0.66
  -3   2  14   14.29    0.66
  -3   2  14   13.34    0.65
   3   2 -14   13.76    0.71
  -4   2 -14    0.54    0.18
   4   2  14    0.10    0.19
   4   2  14    0.39    0.19
  -4  -2 -14    0.63    0.18
   4   2 -14    0.62    0.12
  -4   2  14    0.77    0.22
  -4   2  14    0.48    0.20
   4   2 -14    0.58    0.22
   4   2 -14    0.49    0.20
   5   2  14   13.51    0.73
   5   2  14   15.66    0.75
  -5   2 -14   14.89    0.67
   5   2 -14   13.84    0.51
   5   2 -14   14.97    0.73
   5   2 -14   14.09    0.74
  -5  -2 -14   15.34    0.66
   6   2  14    0.71    0.27
   6   2  14    0.47    0.22
   6   2 -14    0.73    0.14
   6   2 -14    0.82    0.28
   6   2 -14    0.83    0.27
  -6  -2 -14    0.69    0.22
  -6   2  14    0.61    0.28
   7   2  14    1.09    0.29
  -7   2  14    1.14    0.31
   7   2 -14    1.13    0.17
   7   2 -14    1.35    0.32
   8   2  14    2.45    0.42
   8  -2 -14    3.01    0.23
   8   2 -14    2.52    0.41
   8   2 -14    2.82    0.25
  -8   2  14    2.05    0.39
   0   2  15    9.24    0.52
   0   2  15    8.63    0.53
   0  -2 -15    9.60    0.40
   0   2 -15   10.51    0.54
   0   2 -15    9.21    0.59
   0   2 -15    9.02    0.43
  -1   2 -15    5.65    0.34
   1   2  15    5.69    0.42
   1   2  15    6.29    0.45
  -1   2 -15    6.43    0.48
   1  -2 -15    5.86    0.29
  -1   2 -15    6.47    0.43
  -1  -2 -15    5.46    0.31
   1   2 -15    5.79    0.40
   1   2 -15    5.75    0.47
  -1   2  15    5.92    0.42
   1   2 -15    5.66    0.32
  -1   2  15    5.87    0.42
   2   2  15    2.10    0.29
  -2   2 -15    2.24    0.33
   2   2  15    1.94    0.30
  -2   2 -15    2.43    0.30
   2  -2 -15    1.97    0.16
  -2   2 -15    1.73    0.22
   2   2 -15    1.87    0.26
  -2   2  15    1.42    0.26
   2   2 -15    1.80    0.18
   2   2 -15    1.60    0.29
  -2  -2 -15    2.00    0.22
   3   2  15    4.43    0.40
   3  -2 -15    4.12    0.19
  -3   2 -15    3.53    0.32
  -3   2 -15    3.55    0.40
   3   2  15    4.20    0.38
   3   2 -15    3.98    0.25
   3   2 -15    4.64    0.44
   3   2 -15    4.13    0.37
  -3  -2 -15    3.65    0.30
  -3   2  15    3.93    0.37
   4   2  15   10.61    0.62
  -4   2 -15   11.62    0.57
  -4   2 -15   11.06    0.65
   4   2  15   11.52    0.64
  -4  -2 -15   11.11    0.54
   4   2 -15   10.57    0.64
   4   2 -15    9.72    0.58
   4   2 -15   11.50    0.43
  -4   2  15   10.50    0.59
   5   2  15    1.76    0.30
  -5   2 -15    1.86    0.27
  -5   2 -15    1.11    0.29
   5   2  15    1.89    0.33
  -5  -2 -15    2.03    0.28
   5   2 -15    1.44    0.30
   5   2 -15    2.10    0.31
   5   2 -15    1.76    0.18
   6   2  15    0.32    0.27
   6   2  15    0.77    0.26
   6   2 -15    0.61    0.14
   6   2 -15    0.55    0.26
  -6  -2 -15    0.19    0.20
   7   2  15    2.55    0.40
   7   2 -15    2.84    0.24
   7   2 -15    3.59    0.44
   0   2  16    1.63    0.29
   0  -2 -16    2.03    0.20
   0   2 -16    1.61    0.31
   0   2 -16    2.01    0.21
   0   2 -16    2.21    0.30
   1  -2 -16    3.33    0.22
   1   2  16    3.55    0.37
  -1   2 -16    2.85    0.37
  -1   2 -16    3.48    0.29
   1   2  16    3.78    0.39
   1   2 -16    4.05    0.38
  -1  -2 -16    3.56    0.27
  -1   2  16    3.58    0.37
   1   2 -16    3.24    0.26
   1   2 -16    3.30    0.39
   2   2  16    8.07    0.52
  -2   2 -16    7.16    0.54
   2   2  16    6.99    0.50
   2  -2 -16    7.62    0.31
  -2   2 -16    6.96    0.42
   2   2 -16    7.72    0.48
   2   2 -16    6.96    0.35
  -2   2  16    6.87    0.48
   2   2 -16    6.34    0.50
  -2  -2 -16    7.28    0.39
  -3   2 -16    1.40    0.22
   3  -2 -16    1.60    0.14
  -3   2 -16    1.79    0.33
   3   2  16    1.71    0.28
   3   2  16    1.26    0.30
   3   2 -16    1.29    0.26
  -3   2  16    1.63    0.28
  -3  -2 -16    1.34    0.21
   3   2 -16    1.32    0.30
   3   2 -16    1.67    0.18
  -4   2 -16    0.98    0.22
   4   2  16    0.80    0.28
   4   2  16    0.20    0.22
  -4   2 -16    0.68    0.26
  -4   2  16    0.58    0.23
  -4  -2 -16    0.60    0.20
   4   2 -16    0.63    0.26
   4   2 -16    0.61    0.26
   4   2 -16    0.69    0.14
   5   2  16    3.22    0.40
  -5   2 -16    2.55    0.31
   5   2  16    3.48    0.42
  -5   2 -16    2.73    0.38
  -5  -2 -16    2.71    0.31
   5   2 -16    2.90    0.38
   5   2 -16    3.02    0.39
   5   2 -16    3.19    0.23
   6   2  16   11.00    0.69
   6   2  16   11.05    0.67
   6   2 -16   10.52    0.45
   6   2 -16   11.35    0.68
  -6  -2 -16   11.86    0.62
   7   2  16   12.61    0.77
   0   2 -17   12.37    0.75
   0   2  17   12.73    0.70
   0  -2 -17   12.97    0.52
   0   2 -17   13.06    0.56
   1   2  17    3.03    0.35
  -1   2 -17    3.22    0.41
  -1   2 -17    3.62    0.30
   1  -2 -17    3.27    0.23
   1   2 -17    3.45    0.27
   1   2 -17    3.42    0.41
  -1   2  17    2.70    0.36
  -1  -2 -17    3.37    0.27
   2   2  17   10.18    0.62
  -2   2 -17   10.46    0.53
  -2   2 -17   10.57    0.66
   2  -2 -17    9.96    0.40
   2   2 -17   11.24    0.60
   2   2 -17    8.79    0.63
   2   2 -17   10.08    0.45
  -2   2  17   10.22    0.62
  -2  -2 -17   10.35    0.49
   3  -2 -17    0.21    0.11
   3   2  17    0.33    0.22
  -3   2 -17    0.10    0.27
  -3   2 -17    0.21    0.18
   3   2 -17    0.05    0.14
  -3  -2 -17    0.05    0.15
   3   2 -17    0.08    0.20
   3   2 -17    0.11    0.25
  -3   2  17    0.29    0.22
  -4   2 -17    3.66    0.45
   4   2  17    4.86    0.47
   4   2  17    4.62    0.47
  -4   2 -17    4.68    0.39
  -4  -2 -17    4.99    0.39
   4   2 -17    4.13    0.28
   4   2 -17    5.02    0.47
   4   2 -17    4.60    0.49
   5   2  17   13.05    0.75
   5   2  17   14.06    0.79
  -5   2 -17   14.47    0.80
  -5   2 -17   13.75    0.70
   5   2 -17   13.68    0.53
   5   2 -17   13.36    0.78
   5   2 -17   14.22    0.76
  -5  -2 -17   13.59    0.67
   6   2  17    5.29    0.51
   6   2  17    4.57    0.51
   6   2 -17    6.00    0.57
   0   2 -18    0.61    0.19
   0   2 -18    0.06    0.20
   0   2  18    0.39    0.25
   0  -2 -18    0.56    0.17
   1   2  18    7.57    0.55
   1  -2 -18    7.54    0.37
  -1   2 -18    8.21    0.62
  -1   2 -18    8.12    0.45
   1   2 -18    7.08    0.58
   1   2 -18    8.07    0.42
  -1  -2 -18    7.64    0.41
  -1   2  18    8.30    0.57
   2  -2 -18    1.09    0.16
   2   2  18    0.71    0.26
  -2   2 -18    1.33    0.25
  -2   2 -18    0.78    0.31
   2   2 -18    1.07    0.32
   2   2 -18    0.82    0.19
  -2  -2 -18    1.05    0.21
  -2   2  18    0.82    0.27
  -3   2 -18    2.79    0.43
   3  -2 -18    2.83    0.20
   3   2  18    2.44    0.38
  -3   2 -18    2.87    0.31
   3   2 -18    3.09    0.26
   3   2 -18    2.45    0.41
  -3   2  18    2.88    0.39
  -3  -2 -18    3.12    0.31
   4   2  18    8.36    0.60
  -4   2 -18    8.05    0.51
   4  -2 -18    6.93    0.59
  -4   2 -18    7.10    0.62
   4   2 -18    7.76    0.56
  -4  -2 -18    8.00    0.49
   4   2 -18    7.15    0.38
   4   2 -18    7.69    0.60
  -5   2 -18    1.05    0.35
  -5   2 -18    1.88    0.33
   5   2  18    0.69    0.32
   5   2 -18    0.93    0.31
  -5  -2 -18    1.32    0.30
   5   2 -18    0.81    0.34
   0   2 -19    1.18    0.22
   0   2  19    1.08    0.31
   0   2 -19    0.89    0.32
   0  -2 -19    1.40    0.20
  -1   2 -19    1.11    0.34
   1  -2 -19    1.72    0.20
  -1   2 -19    1.62    0.25
   1   2  19    1.67    0.33
  -1  -2 -19    1.29    0.22
   1   2 -19    1.02    0.32
  -1   2  19    1.55    0.33
   1   2 -19    1.19    0.21
   2   2  19    4.53    0.49
   2  -2 -19    5.46    0.30
  -2   2 -19    5.40    0.42
  -2   2 -19    4.56    0.55
  -2   2  19    4.04    0.48
   2   2 -19    4.99    0.55
  -2  -2 -19    6.00    0.38
   2   2 -19    5.27    0.34
  -3   2 -19    1.10    0.26
   3  -2 -19    0.97    0.16
  -3   2 -19    0.49    0.34
   3   2 -19    0.58    0.33
   0  -3   0    0.02    0.05
   0   3   0   -0.01    0.04
   0   3   0    0.06    0.05
   0   3   0    0.01    0.04
   0   3   0   -0.05    0.05
   1  -3   0    6.44    0.25
  -1   3   0    5.48    0.23
  -1   3   0    6.61    0.26
   1   3   0    6.66    0.25
  -1   3   0    6.27    0.26
  -1  -3   0    6.44    0.24
   1   3   0    6.52    0.25
   1   3   0    6.12    0.27
  -1   3   0    6.70    0.26
   2   3   0    4.44    0.22
   2   3   0    4.56    0.24
  -2   3   0    4.75    0.20
  -2   3   0    4.60    0.23
  -2   3   0    4.77    0.24
  -2  -3   0    4.30    0.20
   2  -3   0    4.34    0.21
   2   3   0    4.01    0.21
  -3   3   0  215.19    5.73
   3   3   0  200.17    5.61
   3  -3   0  213.62    5.77
   3  -3   0  207.88    5.62
  -3  -3   0  210.78    5.69
   3   3   0  212.78    5.88
  -3   3   0  226.37    5.80
   3   3   0  210.23    5.72
  -3  -3   0  226.58    5.61
  -4   3   0   16.24    0.61
   4   3   0   16.62    0.58
  -4  -3   0   17.22    0.56
   4   3   0   16.40    0.59
   4  -3   0   16.14    0.57
   4   3   0   17.16    0.57
   4  -3   0   15.90    0.62
  -4  -3   0   16.20    0.58
   5  -3   0   19.24    0.67
  -5   3   0   18.63    0.71
   5   3   0   18.48    0.65
   5   3   0   19.39    0.69
   5  -3   0   18.14    0.72
  -5  -3   0   18.56    0.68
   5   3   0   18.96    0.67
   6  -3   0   80.64    2.43
   6   3   0   81.95    2.35
  -6  -3   0   83.42    2.37
   6  -3   0   77.73    2.29
  -6   3   0   83.76    2.40
   6   3   0   80.69    2.36
   6   3   0   78.40    2.29
   7  -3   0   36.91    1.32
   7  -3   0   38.22    1.22
   7   3   0   36.52    1.26
   7   3   0   37.00    1.20
  -7  -3   0   38.77    1.27
  -7   3   0   37.27    1.29
  -8  -3   0    2.01    0.29
   8  -3   0    1.72    0.25
   8   3   0    1.34    0.22
   8  -3   0    1.05    0.24
   8   3   0    1.76    0.27
  -8   3   0    1.36    0.26
  -9  -3   0   14.77    0.74
   9   3   0   15.16    0.74
   9  -3   0   14.84    0.69
   9   3   0   15.07    0.69
   9  -3   0   14.75    0.78
  -9   3   0   14.72    0.75
 -10   3   0   23.43    1.05
 -10  -3   0   24.05    1.04
  10  -3   0   23.84    0.97
  10   3   0   21.53    1.00
  10  -3   0   23.35    1.08
  10   3   0   23.63    0.96
  11   3   0    9.86    0.67
 -11  -3   0    9.50    0.69
  11  -3   0    9.52    0.60
 -11   3   0    8.02    0.64
  11  -3   0    8.02    0.66
   0   3   1  232.28    6.20
   0   3  -1  249.16    6.14
   0  -3   1  224.60    6.14
   0   3  -1  230.91    6.22
   0   3  -1  243.79    6.24
   0   3   1  241.57    6.13
   0   3   1  233.72    6.42
   0   3  -1  237.83    6.42
   0   3   1  234.63    6.27
   0  -3  -1  226.51    6.13
  -1   3  -1   35.16    0.98
  -1   3  -1   35.13    1.01
   1   3   1   32.96    0.94
   1   3   1   34.64    1.03
   1   3   1   33.29    1.00
  -1   3  -1   34.28    0.99
  -1  -3   1   34.20    0.96
   1   3   1   34.53    0.96
   1  -3  -1   31.82    0.95
  -1   3   1   33.84    1.00
   1   3  -1   34.01    1.03
  -1   3   1   33.78    1.00
  -1   3   1   32.89    0.97
   1   3  -1   34.41    0.96
   1  -3   1   33.74    0.97
  -1  -3  -1   33.38    0.95
   1   3  -1   35.02    0.96
   1   3  -1   33.08    0.97
   2   3   1   22.92    0.67
  -2   3  -1   20.95    0.70
   2   3   1   21.92    0.72
  -2  -3   1   22.18    0.66
   2   3   1   22.23    0.70
  -2   3  -1   21.97    0.66
  -2   3  -1   23.13    0.67
   2  -3  -1   21.86    0.66
   2  -3   1   22.70    0.70
  -2  -3  -1   21.92    0.68
  -2   3   1   23.34    0.69
   2   3  -1   22.59    0.69
  -2   3   1   21.40    0.73
  -2  -3  -1   23.20    0.68
   2   3  -1   23.55    0.69
   2   3  -1   23.88    0.70
  -2   3   1   23.02    0.72
   2   3  -1   22.16    0.74
   2  -3   1   23.54    0.73
   3  -3  -1   15.49    0.57
  -3  -3   1   14.82    0.54
   3   3   1   15.83    0.54
  -3  -3   1   15.49    0.50
   3   3   1   15.45    0.55
   3   3   1   14.96    0.52
  -3   3  -1   15.05    0.56
  -3   3  -1   15.98    0.51
  -3   3  -1   15.90    0.48
   3  -3  -1   16.23    0.51
   3  -3   1   16.01    0.54
   3   3  -1   14.91    0.51
  -3  -3  -1   14.94    0.52
  -3   3   1   15.65    0.56
   3  -3   1   15.16    0.56
  -3   3   1   16.74    0.48
  -3  -3  -1   15.51    0.51
   3   3  -1   15.18    0.55
   3   3  -1   15.93    0.52
   4  -3  -1   65.68    1.86
   4   3   1   70.26    1.96
  -4  -3   1   65.20    1.92
   4  -3  -1   67.12    1.97
   4   3   1   62.29    1.87
  -4   3  -1   69.31    1.84
   4   3   1   66.44    1.92
  -4   3  -1   66.17    1.94
  -4  -3   1   69.08    1.85
   4  -3   1   66.19    1.98
   4  -3   1   69.66    1.92
  -4   3   1   68.21    1.97
  -4  -3  -1   65.97    1.91
  -4  -3  -1   68.04    1.88
   4   3  -1   67.89    1.93
   4   3  -1   68.99    1.98
   4   3  -1   67.31    1.89
  -5  -3   1   22.11    0.81
  -5   3  -1   23.26    0.84
   5   3   1   24.30    0.80
   5  -3  -1   24.34    0.78
   5  -3  -1   22.99    0.86
   5   3   1   24.62    0.79
   5   3   1   23.90    0.82
   5   3  -1   24.51    0.81
   5   3  -1   22.74    0.80
  -5   3   1   24.09    0.84
   5   3  -1   23.86    0.78
   5  -3   1   23.00    0.86
  -5  -3  -1   23.76    0.80
   5  -3   1   24.42    0.80
   6   3   1   24.95    0.88
  -6   3  -1   24.53    0.91
   6   3   1   24.71    0.84
   6  -3  -1   24.59    0.94
   6  -3  -1   24.40    0.83
  -6  -3   1   24.78    0.90
   6   3   1   25.82    0.86
  -6   3   1   23.33    0.89
  -6  -3  -1   24.18    0.86
   6   3  -1   24.21    0.83
   6   3  -1   24.76    0.83
   6  -3   1   23.86    0.91
   6  -3   1   24.25    0.85
   6   3  -1   25.72    0.87
  -7   3  -1    5.79    0.40
   7   3   1    6.02    0.39
   7  -3  -1    6.27    0.43
   7  -3  -1    7.14    0.38
   7   3   1    5.64    0.36
  -7  -3   1    6.22    0.41
   7   3  -1    6.53    0.37
  -7   3   1    6.05    0.40
   7  -3   1    6.12    0.42
  -7  -3  -1    6.52    0.40
   7   3  -1    5.52    0.38
   7  -3   1    6.49    0.38
   8   3   1   33.58    1.18
   8   3   1   33.52    1.12
  -8  -3   1   32.20    1.18
   8  -3  -1   33.05    1.11
  -8   3  -1   27.76    1.15
   8  -3  -1   32.34    1.23
  -8   3   1   32.11    1.21
   8  -3   1   32.75    1.15
   8   3  -1   31.23    1.11
   8  -3   1   32.09    1.23
  -8  -3  -1   34.03    1.19
   8   3  -1   33.62    1.18
   9   3   1    5.00    0.39
   9  -3  -1    4.51    0.44
  -9   3  -1    4.65    0.44
   9   3   1    5.15    0.43
   9  -3  -1    3.85    0.36
  -9  -3   1    4.04    0.42
   9  -3   1    4.88    0.45
  -9   3   1    3.98    0.41
  -9  -3  -1    4.57    0.42
   9  -3   1    3.90    0.37
   9   3  -1    4.73    0.42
   9   3  -1    4.59    0.38
  10   3   1    1.37    0.30
  10   3   1    0.88    0.27
 -10  -3   1    0.97    0.31
 -10   3  -1    1.28    0.30
  10  -3  -1    1.00    0.26
  10  -3  -1    0.89    0.29
  10  -3   1    1.23    0.29
  10   3  -1    1.44    0.33
  10  -3   1    1.58    0.33
 -10   3   1    1.13    0.31
 -10  -3  -1    1.38    0.33
  10   3  -1    1.54    0.30
  11  -3  -1    3.72    0.40
 -11   3  -1    3.46    0.46
  11  -3  -1    3.57    0.48
 -11  -3   1    4.10    0.49
  11   3   1    4.86    0.52
  11  -3   1    3.74    0.44
 -11   3   1    2.98    0.45
  11   3  -1    3.41    0.48
  11   3  -1    4.28    0.44
  11  -3   1    3.76    0.49
 -11  -3  -1    4.13    0.49
   0   3   2    0.44    0.09
   0   3  -2    0.26    0.07
   0  -3  -2    0.44    0.07
   0  -3   2    0.42    0.08
   0   3   2    0.31    0.05
   0   3  -2    0.27    0.05
   0   3   2    0.32    0.08
   0   3  -2    0.26    0.07
   0   3  -2    0.38    0.08
  -1  -3   2   25.83    0.76
   1  -3  -2   25.41    0.74
   1   3   2   26.13    0.75
   1   3   2   26.70    0.72
   1   3   2   25.98    0.81
   1   3   2   25.90    0.82
  -1   3  -2   25.45    0.76
  -1   3  -2   26.92    0.80
  -1   3  -2   26.21    0.80
   1   3  -2   26.88    0.81
   1   3  -2   27.59    0.78
   1   3  -2   25.97    0.84
   1  -3   2   27.35    0.79
  -1   3   2   25.57    0.83
  -1  -3  -2   26.92    0.78
   1   3  -2   27.84    0.76
  -1   3   2   26.56    0.78
  -1   3   2   27.51    0.82
  -2   3  -2   22.18    0.68
  -2   3  -2   22.28    0.72
   2  -3  -2   21.77    0.65
   2   3   2   22.92    0.72
   2  -3  -2   21.13    0.64
   2   3   2   23.69    0.68
   2   3   2   22.31    0.72
  -2   3  -2   21.91    0.67
   2   3  -2   25.40    0.77
   2  -3   2   24.38    0.76
   2  -3   2   25.55    0.77
  -2  -3  -2   25.19    0.74
   2   3  -2   24.64    0.72
  -2   3   2   25.27    0.76
   2   3  -2   23.92    0.80
  -2   3   2   25.94    0.75
   2   3  -2   24.75    0.73
  -2   3   2   22.46    0.78
  -2  -3  -2   24.60    0.71
  -3   3  -2   12.64    0.49
   3   3   2   13.56    0.46
   3  -3  -2   12.37    0.42
  -3   3  -2   12.76    0.44
   3  -3  -2   12.93    0.42
  -3  -3   2   12.67    0.48
   3   3   2   12.44    0.47
   3   3   2   12.65    0.48
  -3  -3  -2   13.10    0.44
  -3  -3  -2   12.07    0.42
  -3   3   2   12.84    0.41
   3  -3   2   12.42    0.48
   3   3  -2   12.70    0.48
  -3   3   2   12.81    0.47
   3   3  -2   12.48    0.43
   3   3  -2   12.91    0.43
   3  -3   2   12.27    0.46
  -3   3   2   11.79    0.49
   4  -3  -2   49.86    1.37
  -4   3  -2   51.05    1.40
   4   3   2   50.59    1.47
  -4   3  -2   48.97    1.38
   4  -3  -2   48.80    1.51
   4  -3  -2   47.37    1.38
   4   3   2   49.52    1.42
  -4  -3   2   47.28    1.47
  -4   3  -2   47.48    1.48
   4   3   2   47.71    1.47
   4  -3   2   49.64    1.45
  -4  -3  -2   51.13    1.42
   4   3  -2   48.74    1.41
  -4   3   2   50.73    1.38
   4   3  -2   47.64    1.43
   4  -3   2   48.22    1.50
   4   3  -2   50.12    1.49
  -4   3   2   49.64    1.48
  -4  -3  -2   48.40    1.43
   5  -3  -2    4.88    0.26
  -5  -3   2    5.07    0.31
  -5   3  -2    4.28    0.29
   5   3   2    4.77    0.27
   5   3   2    5.06    0.30
   5   3   2    4.91    0.28
   5  -3  -2    4.36    0.32
   5   3  -2    5.48    0.28
  -5   3   2    5.39    0.32
   5  -3   2    5.03    0.33
   5   3  -2    4.83    0.28
   5  -3   2    5.11    0.30
  -5  -3  -2    5.48    0.29
   5   3  -2    5.42    0.29
  -5  -3  -2    5.03    0.28
   6  -3  -2    3.45    0.31
   6   3   2    3.23    0.25
   6   3   2    2.91    0.26
   6   3   2    3.65    0.24
   6  -3  -2    3.34    0.24
  -6  -3   2    3.26    0.29
  -6   3  -2    3.09    0.28
   6   3  -2    2.91    0.23
   6   3  -2    2.85    0.23
   6  -3   2    2.78    0.28
  -6   3   2    3.37    0.29
   6   3  -2    2.84    0.25
  -6  -3  -2    3.06    0.25
   6  -3   2    2.66    0.24
   7   3   2   62.21    1.87
   7   3   2   62.93    1.94
   7  -3  -2   62.14    2.00
   7  -3  -2   60.24    1.84
  -7   3  -2   64.56    1.97
  -7  -3   2   64.33    1.96
   7  -3   2   64.71    1.94
   7  -3   2   65.80    2.05
  -7  -3  -2   63.82    1.95
   7   3  -2   65.46    1.90
  -7   3   2   61.82    2.00
   7   3  -2   64.90    1.97
   8  -3  -2   13.36    0.70
   8  -3  -2   12.78    0.58
  -8   3  -2   13.58    0.67
  -8  -3   2   13.04    0.66
   8   3   2   14.39    0.63
   8   3   2   13.14    0.64
   8   3  -2   14.35    0.65
   8   3  -2   13.12    0.60
  -8   3   2   13.89    0.69
   8  -3   2   14.27    0.71
  -8  -3  -2   14.51    0.67
   8  -3   2   13.22    0.63
   9   3   2    3.66    0.35
  -9  -3   2    3.39    0.39
   9  -3  -2    3.24    0.32
  -9   3  -2    3.07    0.36
   9   3   2    3.59    0.37
   9  -3  -2    3.04    0.38
   9  -3   2    3.57    0.35
  -9  -3  -2    3.61    0.37
   9   3  -2    3.35    0.36
   9  -3   2    3.62    0.41
   9   3  -2    3.54    0.33
  -9   3   2    3.74    0.39
  10  -3  -2    7.20    0.58
  10  -3  -2    6.10    0.46
 -10   3  -2    6.67    0.53
  10   3   2    6.53    0.52
 -10  -3   2    7.39    0.56
  10  -3   2    7.65    0.53
 -10  -3  -2    6.97    0.53
  10   3  -2    6.75    0.47
 -10   3   2    6.51    0.52
  10   3  -2    7.08    0.52
  10  -3   2    7.11    0.59
  11  -3  -2    0.35    0.25
  11  -3  -2    0.00    0.28
  11   3   2    0.31    0.28
 -11   3  -2    0.24    0.27
 -11  -3   2   -0.29    0.31
  11  -3   2   -0.30    0.28
  11   3  -2    0.75    0.28
  11   3  -2    0.42    0.28
 -11   3   2    0.07    0.28
   0   3   3  121.90    3.34
   0   3   3  122.20    3.18
   0   3  -3  115.05    3.24
   0  -3   3  125.88    3.20
   0  -3  -3  115.90    3.15
   0   3  -3  125.43    3.18
   0   3   3  113.57    3.27
   0   3  -3  119.42    3.34
  -1   3  -3    6.66    0.27
   1   3   3    6.76    0.29
  -1   3  -3    6.21    0.29
   1  -3  -3    7.15    0.24
   1   3   3    6.92    0.31
  -1   3  -3    7.29    0.29
   1  -3  -3    6.41    0.23
   1  -3   3    6.62    0.25
  -1  -3  -3    7.13    0.26
  -1   3   3    7.27    0.29
   1  -3   3    7.02    0.28
  -1   3   3    6.24    0.30
   1   3  -3    6.91    0.27
   1   3  -3    7.38    0.31
  -1   3   3    6.98    0.25
   1   3  -3    6.97    0.22
   1   3  -3    6.84    0.29
  -2   3  -3   77.25    2.16
  -2   3  -3   76.10    2.15
   2   3   3   77.31    2.16
   2  -3  -3   78.42    2.05
   2   3   3   78.68    2.08
   2  -3  -3   72.89    2.04
  -2   3  -3   76.29    2.09
   2   3   3   77.08    2.20
  -2   3   3   78.62    2.25
  -2  -3  -3   83.35    2.17
   2  -3   3   78.34    2.21
   2   3  -3   78.67    2.15
   2   3  -3   78.14    2.22
  -2  -3  -3   81.86    2.14
   2  -3   3   81.04    2.19
   2   3  -3   79.15    2.15
   2   3  -3   78.87    2.29
  -2   3   3   81.91    2.24
  -2   3   3   79.20    2.19
   3   3   3   38.76    1.23
   3  -3  -3   41.40    1.13
   3  -3  -3   41.66    1.14
   3   3   3   41.25    1.18
  -3   3  -3   40.78    1.24
  -3  -3   3   39.20    1.23
  -3   3  -3   42.45    1.18
  -3   3  -3   41.14    1.19
   3   3   3   38.53    1.23
  -3   3   3   36.73    1.22
   3   3  -3   39.87    1.23
  -3   3   3   39.71    1.19
  -3  -3  -3   39.73    1.15
   3  -3   3   39.30    1.18
   3  -3   3   40.27    1.20
  -3  -3  -3   41.08    1.13
   3   3  -3   41.34    1.14
  -4   3  -3   70.42    2.11
  -4   3  -3   72.06    2.02
   4  -3  -3   71.14    2.14
   4  -3  -3   69.83    1.98
   4   3   3   74.64    2.04
   4   3   3   72.48    2.12
   4   3   3   73.71    2.11
  -4  -3   3   72.97    2.11
   4  -3  -3   74.97    1.97
  -4   3  -3   74.29    2.04
  -4   3   3   71.12    2.10
   4   3  -3   73.67    2.15
  -4   3   3   75.21    2.04
   4  -3   3   72.51    2.07
  -4  -3  -3   75.63    2.05
   4   3  -3   69.53    2.02
   4   3  -3   73.05    2.06
  -4  -3  -3   76.41    2.05
   4  -3   3   74.39    2.13
  -5  -3   3    0.50    0.14
  -5   3  -3    0.37    0.12
   5  -3  -3    0.59    0.11
   5   3   3    0.30    0.11
   5   3   3    0.71    0.14
   5  -3  -3    0.44    0.13
   5   3   3    0.26    0.11
  -5  -3  -3    0.68    0.12
   5   3  -3    0.60    0.12
   5  -3   3    0.71    0.14
  -5   3   3    0.37    0.13
   5  -3   3    0.40    0.13
  -5  -3  -3    0.61    0.12
   5   3  -3    0.41    0.12
   5   3  -3    0.52    0.11
   6   3   3    0.31    0.13
   6  -3  -3    0.11    0.14
  -6  -3   3    0.19    0.13
   6  -3  -3    0.15    0.11
   6   3   3    0.33    0.12
   6   3   3    0.17    0.11
  -6   3  -3    0.38    0.14
   6  -3   3    0.01    0.12
   6   3  -3    0.12    0.12
   6   3  -3    0.16    0.11
   6  -3   3    0.29    0.13
  -6  -3  -3    0.19    0.13
   6   3  -3    0.11    0.11
  -6   3   3   -0.03    0.13
   7   3   3   20.42    0.82
   7   3   3   22.42    0.80
   7  -3  -3   20.76    0.88
  -7   3  -3   20.61    0.84
  -7  -3   3   21.09    0.86
   7  -3  -3   18.95    0.73
   7   3  -3   20.95    0.81
  -7   3   3   20.26    0.85
   7  -3   3   23.20    0.90
   7  -3   3   21.68    0.82
  -7  -3  -3   20.83    0.80
   7   3  -3   21.79    0.78
   8  -3  -3   11.74    0.53
  -8  -3   3   10.99    0.62
  -8   3  -3   11.25    0.60
   8   3   3   11.81    0.61
   8  -3  -3   11.41    0.64
   8   3   3   12.32    0.58
  -8  -3  -3   11.99    0.60
   8  -3   3   12.82    0.62
  -8   3   3   12.92    0.66
   8  -3   3   13.88    0.69
   8   3  -3   13.59    0.63
   8   3  -3   12.01    0.56
  -9   3  -3   25.00    1.06
   9  -3  -3   26.16    0.96
   9   3   3   24.99    1.04
  -9  -3   3   26.60    1.09
   9  -3  -3   25.55    1.11
   9   3  -3   26.52    0.99
   9   3  -3   26.32    1.04
  -9   3   3   25.64    1.08
   9  -3   3   25.83    1.03
   9  -3   3   25.58    1.11
  -9  -3  -3   27.50    1.06
 -10   3  -3    4.14    0.45
  10  -3  -3    4.42    0.48
  10   3   3    4.61    0.44
 -10  -3   3    4.09    0.46
  10  -3  -3    3.46    0.35
  10  -3   3    4.43    0.48
 -10   3   3    3.53    0.43
  10   3  -3    4.64    0.46
  10   3  -3    4.45    0.39
  11   3   3    5.26    0.54
  11  -3  -3    6.32    0.62
  11  -3  -3    5.66    0.47
 -11  -3   3    7.06    0.62
 -11   3  -3    5.82    0.56
 -11   3   3    6.16    0.58
  11   3  -3    5.60    0.56
  11  -3   3    6.48    0.60
  11   3  -3    5.83    0.50
   0   3  -4  151.11    4.17
   0   3   4  154.07    4.28
   0   3  -4  156.51    4.09
   0  -3  -4  158.52    4.06
   0   3   4  153.31    4.21
   0  -3  -4  150.16    4.05
   0   3  -4  151.51    4.29
   0  -3   4  159.02    4.09
   0   3   4  159.87    4.09
  -1   3  -4   55.65    1.64
   1  -3  -4   55.91    1.51
   1   3   4   54.82    1.65
   1  -3  -4   59.02    1.51
  -1   3  -4   56.33    1.62
  -1   3  -4   54.96    1.56
   1   3   4   57.58    1.64
   1   3  -4   56.71    1.65
  -1   3   4   56.82    1.68
   1   3  -4   58.21    1.59
   1   3  -4   54.07    1.70
  -1   3   4   58.74    1.68
   1  -3   4   59.79    1.62
  -1  -3  -4   57.54    1.58
  -1   3   4   61.05    1.59
   1  -3   4   59.27    1.59
   2  -3  -4  129.78    3.30
   2  -3  -4  124.21    3.30
  -2   3  -4  123.97    3.44
   2   3   4  128.88    3.35
   2   3   4  125.42    3.47
  -2   3  -4  130.41    3.50
  -2   3  -4  119.27    3.36
   2   3   4  124.79    3.53
   2   3  -4  134.95    3.50
  -2   3   4  129.54    3.62
  -2  -3  -4  127.68    3.50
   2   3  -4  128.57    3.70
   2   3  -4  134.68    3.49
  -2   3   4  131.73    3.65
   2  -3   4  130.18    3.56
  -2  -3  -4  131.06    3.48
   2   3  -4  133.20    3.59
  -2   3   4  132.45    3.55
   2  -3   4  134.91    3.54
  -3  -3   4    6.18    0.33
   3   3   4    6.64    0.32
   3  -3  -4    6.62    0.24
   3  -3  -4    6.78    0.24
  -3   3  -4    5.93    0.29
   3   3   4    6.24    0.32
  -3   3  -4    6.99    0.34
   3   3   4    6.89    0.30
  -3   3  -4    7.17    0.29
   3   3  -4    6.06    0.32
  -3   3   4    6.62    0.34
   3   3  -4    7.10    0.29
  -3   3   4    7.53    0.29
  -3   3   4    6.74    0.32
  -3  -3  -4    6.93    0.30
   3   3  -4    7.38    0.27
   3  -3   4    6.79    0.33
   3  -3   4    6.81    0.32
  -3  -3  -4    6.99    0.26
   4   3   4   26.24    0.85
  -4   3  -4   24.74    0.81
   4  -3  -4   26.13    0.74
   4  -3  -4   25.54    0.90
  -4   3  -4   24.98    0.87
  -4  -3   4   24.15    0.87
   4   3   4   25.86    0.82
   4  -3  -4   25.44    0.76
   4   3   4   24.65    0.87
  -4  -3  -4   24.56    0.79
   4   3  -4   27.07    0.81
  -4   3   4   26.39    0.87
  -4  -3  -4   26.68    0.83
   4  -3   4   25.92    0.88
   4   3  -4   25.73    0.88
   4   3  -4   24.74    0.80
   4  -3   4   26.29    0.86
  -4   3   4   26.61    0.79
   5   3   4   19.28    0.73
   5  -3  -4   18.38    0.75
   5   3   4   20.81    0.71
   5   3   4   19.31    0.68
   5  -3  -4   19.17    0.63
  -5   3  -4   18.64    0.73
  -5  -3   4   18.23    0.73
  -5  -3  -4   21.54    0.72
   5  -3   4   20.31    0.77
  -5  -3  -4   20.67    0.70
   5   3  -4   20.94    0.71
   5   3  -4   21.85    0.69
  -5   3   4   18.89    0.75
   5   3  -4   20.41    0.74
   5  -3   4   20.09    0.74
   6  -3  -4   29.38    1.09
   6   3   4   31.25    1.00
   6   3   4   29.96    1.00
   6  -3  -4   28.64    0.93
  -6  -3   4   29.53    1.07
   6   3   4   28.77    1.04
  -6   3  -4   31.64    1.07
   6   3  -4   31.83    1.05
   6   3  -4   31.99    1.03
   6  -3   4   31.48    1.06
   6   3  -4   31.60    1.00
   6  -3   4   30.80    1.10
  -6   3   4   30.16    1.08
  -6  -3  -4   29.81    1.01
   7  -3  -4    8.38    0.52
   7  -3  -4    8.19    0.39
  -7  -3   4    8.58    0.50
   7   3   4    8.17    0.48
  -7   3  -4    8.14    0.48
   7   3  -4    8.56    0.45
  -7   3   4    8.09    0.49
   7  -3   4    8.45    0.47
  -7  -3  -4    8.47    0.44
   7   3  -4    8.69    0.42
   7  -3   4    8.81    0.50
  -8  -3   4    5.55    0.43
  -8   3  -4    4.74    0.41
   8  -3  -4    5.65    0.35
   8  -3  -4    5.25    0.45
   8   3   4    5.40    0.41
  -8   3   4    5.31    0.43
   8   3  -4    4.80    0.37
   8   3  -4    4.99    0.36
   8  -3   4    5.24    0.41
   8  -3   4    6.09    0.45
  -8  -3  -4    5.24    0.38
  -9  -3   4    2.51    0.37
   9  -3  -4    3.25    0.30
   9  -3  -4    3.69    0.42
   9   3   4    3.55    0.38
  -9   3  -4    2.91    0.36
   9   3  -4    3.24    0.31
   9  -3   4    3.70    0.40
   9   3  -4    3.40    0.35
  -9   3   4    2.60    0.36
 -10   3  -4    6.34    0.55
  10  -3  -4    7.20    0.60
 -10  -3   4    6.55    0.57
  10  -3  -4    7.41    0.47
  10   3   4    7.00    0.54
  10   3  -4    7.42    0.50
 -10   3   4    6.85    0.55
  10  -3   4    7.75    0.58
  11  -3  -4    0.53    0.26
  11  -3  -4    1.34    0.37
 -11  -3   4    1.79    0.44
  11   3   4    1.15    0.35
 -11   3  -4    0.64    0.32
  11  -3   4    0.85    0.36
  11   3  -4    1.06    0.30
   0  -3  -5  193.88    4.90
   0   3   5  184.82    5.17
   0  -3  -5  180.76    4.89
   0   3   5  179.47    5.07
   0   3   5  193.79    4.95
   0   3  -5  189.21    5.19
   0   3  -5  185.05    5.03
   0   3  -5  192.34    4.93
   1  -3  -5   50.34    1.31
  -1   3  -5   47.81    1.37
   1  -3  -5   48.93    1.31
  -1   3  -5   49.63    1.45
   1   3   5   46.84    1.45
  -1   3  -5   49.59    1.43
   1   3   5   45.49    1.44
  -1   3   5   52.28    1.42
   1  -3   5   51.24    1.45
  -1   3   5   50.91    1.52
   1  -3   5   51.46    1.41
  -1  -3  -5   49.57    1.41
   1   3  -5   51.38    1.42
  -1   3   5   52.09    1.51
   1   3  -5   50.62    1.49
   1   3  -5   50.78    1.54
   2  -3  -5   15.83    0.46
  -2   3  -5   16.49    0.59
  -2   3  -5   16.10    0.54
  -2   3  -5   16.08    0.56
   2  -3  -5   15.90    0.46
   2   3   5   15.79    0.59
   2   3   5   15.19    0.57
  -2   3   5   17.01    0.57
   2   3  -5   15.81    0.60
   2   3  -5   16.76    0.47
   2  -3   5   16.37    0.54
   2  -3   5   17.76    0.58
  -2  -3  -5   15.88    0.53
  -2   3   5   16.85    0.55
  -2   3   5   15.95    0.60
   2   3  -5   15.17    0.51
   2   3  -5   16.54    0.59
  -3   3  -5   28.17    0.88
   3   3   5   28.14    0.94
   3  -3  -5   28.71    0.79
  -3   3  -5   28.78    0.93
   3  -3  -5   28.24    0.80
   3   3   5   27.92    0.93
  -3   3  -5   27.96    0.90
   3   3   5   28.98    0.87
   3   3  -5   29.92    0.86
  -3  -3  -5   29.82    0.84
   3   3  -5   29.57    0.87
   3   3  -5   29.80    0.96
  -3   3   5   29.52    0.91
  -3   3   5   28.80    0.92
   3  -3   5   30.08    0.93
  -3   3   5   27.69    0.97
  -3  -3  -5   29.41    0.90
   3   3  -5   30.80    0.89
   3  -3   5   29.00    0.93
   3   3  -5   29.70    0.98
  -4   3  -5   64.25    1.96
   4  -3  -5   68.65    1.79
   4  -3  -5   65.55    1.80
   4   3   5   67.27    1.97
  -4   3  -5   68.58    1.91
  -4  -3   5   64.76    1.97
   4   3   5   65.13    1.96
   4   3   5   65.39    1.88
  -4   3  -5   66.86    1.88
  -4   3   5   67.39    1.99
   4  -3   5   68.60    1.98
  -4  -3  -5   69.38    1.91
  -4  -3  -5   69.75    1.94
   4   3  -5   65.89    1.90
   4   3  -5   69.88    1.93
   4  -3   5   71.40    2.01
   4   3  -5   68.91    2.05
   5  -3  -5   29.01    0.87
  -5  -3   5   28.68    1.02
   5   3   5   28.66    0.97
   5   3   5   29.66    0.95
  -5   3  -5   29.49    0.90
   5   3   5   28.56    1.00
   5  -3  -5   28.07    1.03
  -5   3  -5   28.49    0.93
  -5   3  -5   29.92    1.01
  -5  -3  -5   29.93    0.93
   5  -3   5   29.63    1.02
   5   3  -5   30.58    0.95
   5  -3   5   29.52    0.99
   5   3  -5   30.65    1.02
   5   3  -5   30.07    0.93
  -5  -3  -5   29.25    0.96
  -5   3   5   29.18    1.01
   6   3   5    5.61    0.32
  -6   3  -5    4.64    0.35
   6   3   5    4.75    0.35
   6  -3  -5    5.17    0.27
   6  -3  -5    5.40    0.39
  -6  -3   5    5.20    0.38
   6   3  -5    5.30    0.30
   6  -3   5    5.06    0.36
   6   3  -5    5.29    0.32
   6   3  -5    5.79    0.34
   6  -3   5    6.07    0.38
  -6   3   5    5.28    0.36
  -6  -3  -5    5.38    0.32
   7   3   5    1.40    0.24
  -7   3  -5    1.89    0.26
  -7  -3   5    1.35    0.25
   7  -3  -5    1.85    0.19
   7  -3  -5    1.45    0.27
   7   3  -5    1.85    0.23
   7   3  -5    1.68    0.21
   7  -3   5    2.06    0.26
  -7   3   5    1.85    0.24
   7  -3   5    1.87    0.26
  -8  -3   5   11.50    0.63
   8   3   5    9.94    0.57
   8  -3  -5   10.01    0.61
  -8   3  -5    9.78    0.57
   8  -3  -5    9.77    0.47
   8   3  -5   11.22    0.56
  -8   3   5   10.93    0.61
   8   3  -5   11.01    0.52
   8  -3   5   10.11    0.59
   9   3   5    1.03    0.27
  -9   3  -5    1.22    0.27
   9  -3  -5    1.22    0.30
  -9  -3   5    1.38    0.29
   9  -3  -5    1.19    0.22
   9   3  -5    1.37    0.25
   9  -3   5    1.17    0.28
  -9   3   5    1.40    0.31
  10   3   5    1.10    0.29
  10  -3  -5    1.52    0.27
 -10  -3   5    1.38    0.33
  10  -3  -5    1.31    0.32
 -10   3  -5    0.81    0.27
 -10   3   5    0.96    0.30
  10  -3   5    1.08    0.30
  10   3  -5    1.33    0.27
 -11  -3   5    9.30    0.72
 -11   3  -5    8.47    0.66
  11  -3  -5    9.03    0.70
  11   3  -5    7.95    0.53
   0  -3  -6   17.05    0.49
   0   3   6   17.03    0.63
   0   3   6   16.80    0.61
   0  -3  -6   16.82    0.51
   0   3  -6   17.82    0.56
   0   3  -6   16.88    0.62
   0  -3  -6   16.62    0.52
   0   3  -6   16.77    0.60
   1   3   6   64.82    1.87
  -1   3  -6   60.93    1.81
   1   3   6   61.06    1.84
   1  -3  -6   64.29    1.68
  -1   3  -6   62.14    1.86
  -1   3  -6   63.45    1.75
   1   3  -6   62.44    1.81
  -1   3   6   69.51    1.83
   1  -3   6   68.00    1.82
  -1   3   6   68.18    1.95
   1   3  -6   67.14    1.91
  -1  -3  -6   64.83    1.81
  -1   3   6   65.82    1.95
   1   3  -6   67.76    1.99
  -2   3  -6   21.39    0.77
  -2   3  -6   22.53    0.73
   2  -3  -6   23.72    0.64
   2  -3  -6   23.14    0.64
  -2   3  -6   22.97    0.78
   2   3   6   22.97    0.80
   2   3   6   23.39    0.79
  -2  -3  -6   23.80    0.75
  -2   3   6   25.72    0.77
  -2   3   6   24.36    0.80
   2  -3   6   24.40    0.75
   2   3  -6   24.26    0.85
   2   3  -6   23.36    0.81
   2  -3   6   24.94    0.78
   2   3  -6   24.00    0.73
   2   3  -6   25.78    0.76
  -2   3   6   23.66    0.84
   3   3   6   40.92    1.30
   3  -3  -6   41.63    1.11
  -3   3  -6   41.10    1.22
  -3   3  -6   41.96    1.29
   3  -3  -6   40.32    1.11
   3   3   6   39.14    1.28
  -3   3  -6   41.57    1.26
   3   3  -6   43.04    1.19
   3   3  -6   41.96    1.34
   3  -3   6   42.99    1.28
  -3   3   6   41.81    1.33
  -3   3   6   43.21    1.29
  -3  -3  -6   42.92    1.17
   3   3  -6   42.58    1.21
   3  -3   6   41.93    1.26
  -3   3   6   42.63    1.28
  -3  -3  -6   42.33    1.24
   3   3  -6   40.99    1.31
   4  -3  -6    4.22    0.18
   4  -3  -6    4.07    0.18
  -4   3  -6    3.78    0.28
  -4   3  -6    3.84    0.25
   4   3   6    3.84    0.26
  -4   3  -6    4.45    0.25
  -4  -3   6    4.02    0.30
   4   3   6    3.67    0.28
  -4   3   6    3.86    0.29
   4   3  -6    3.72    0.21
  -4  -3  -6    3.67    0.23
  -4   3   6    4.06    0.23
  -4   3   6    4.04    0.27
   4   3  -6    3.94    0.21
   4  -3   6    4.28    0.29
  -4  -3  -6    4.47    0.22
   4  -3   6    4.31    0.27
   4   3  -6    4.32    0.28
   5  -3  -6   32.55    1.17
  -5   3  -6   34.20    1.15
   5  -3  -6   32.52    0.98
   5   3   6   34.51    1.12
   5   3   6   34.78    1.16
  -5  -3   6   34.52    1.17
  -5  -3  -6   35.34    1.09
  -5   3   6   34.25    1.14
   5  -3   6   34.38    1.12
   5   3  -6   32.84    1.14
   5  -3   6   34.53    1.14
   5   3  -6   32.72    1.05
   5   3  -6   35.07    1.04
  -6   3  -6    0.62    0.18
  -6  -3   6    1.11    0.22
   6   3   6    0.98    0.20
   6  -3  -6    0.56    0.18
   6  -3  -6    0.91    0.13
   6   3   6    0.93    0.17
   6  -3   6    1.04    0.20
  -6   3   6    0.98    0.20
   6   3  -6    1.32    0.19
   6   3  -6    1.19    0.16
   6   3  -6    1.26    0.18
   7  -3  -6    5.21    0.41
   7  -3  -6    4.01    0.27
   7   3   6    4.62    0.36
  -7  -3   6    4.18    0.39
  -7   3  -6    4.25    0.37
   7   3  -6    4.72    0.30
  -7   3   6    4.27    0.37
   7  -3   6    4.30    0.38
  -8   3  -6    9.90    0.58
  -8  -3   6    9.37    0.59
   8   3   6   10.32    0.58
   8  -3  -6    9.09    0.59
   8  -3  -6    9.05    0.44
  -8   3   6   10.03    0.60
   8  -3   6   10.31    0.60
   8   3  -6   10.66    0.50
   9   3   6    5.83    0.50
   9  -3  -6    6.95    0.41
  -9   3  -6    6.08    0.48
  -9  -3   6    6.74    0.53
   9  -3  -6    6.40    0.52
   9   3  -6    6.48    0.42
  -9   3   6    6.79    0.54
   9  -3   6    6.88    0.54
  10  -3  -6    0.91    0.24
 -10  -3   6    0.53    0.30
  10   3   6    0.85    0.29
  10  -3  -6    1.01    0.32
 -10   3  -6    0.76    0.29
  10  -3   6    0.57    0.29
 -10   3   6    0.76    0.30
  10   3  -6    0.66    0.24
   0   3  -7   73.06    2.06
   0  -3  -7   74.08    2.01
   0   3   7   74.81    2.18
   0  -3  -7   78.44    2.01
   0   3  -7   75.58    2.22
   0   3  -7   74.36    2.14
   0  -3  -7   77.69    2.02
   0   3   7   71.32    2.19
   1  -3  -7   91.07    2.40
  -1   3  -7   92.02    2.48
  -1   3  -7   88.22    2.56
   1  -3  -7   93.68    2.40
   1   3   7   90.41    2.60
  -1   3  -7   89.56    2.63
   1   3   7   90.26    2.63
   1   3  -7   85.41    2.67
   1   3  -7   91.67    2.48
   1   3  -7   97.23    2.51
   1  -3   7   94.02    2.49
  -1   3   7   90.18    2.64
  -1   3   7   95.44    2.50
   1   3  -7   92.97    2.59
  -1   3   7   89.10    2.62
  -1  -3  -7   90.46    2.49
  -1  -3  -7   92.43    2.47
   2   3   7   16.53    0.64
  -2   3  -7   18.15    0.65
   2  -3  -7   17.63    0.50
   2   3   7   17.25    0.66
  -2   3  -7   17.28    0.60
   2  -3  -7   17.31    0.49
  -2   3  -7   17.54    0.65
  -2   3   7   18.36    0.60
   2  -3   7   18.45    0.62
   2   3  -7   17.57    0.66
   2   3  -7   19.10    0.60
  -2   3   7   17.51    0.64
  -2   3   7   16.27    0.66
   2  -3   7   17.94    0.58
   2   3  -7   18.17    0.57
   2   3  -7   17.18    0.68
  -2  -3  -7   17.90    0.59
   3   3   7   25.40    0.89
  -3   3  -7   24.70    0.83
  -3   3  -7   26.74    0.87
   3  -3  -7   25.61    0.71
   3   3   7   25.01    0.90
  -3   3  -7   26.95    0.90
   3  -3  -7   25.59    0.71
   3   3  -7   27.33    0.94
   3   3  -7   25.88    0.90
   3  -3   7   26.94    0.84
   3  -3   7   27.33    0.87
  -3  -3  -7   26.25    0.83
  -3   3   7   27.09    0.87
   3   3  -7   25.96    0.77
  -3   3   7   26.95    0.87
   3   3  -7   24.48    0.78
  -3   3   7   24.72    0.91
  -4   3  -7    9.58    0.46
  -4   3  -7    9.22    0.41
  -4   3  -7   10.12    0.43
   4  -3  -7   10.12    0.32
   4  -3  -7    9.64    0.31
   4   3   7    9.34    0.45
   4   3   7    9.82    0.48
   4  -3   7   10.33    0.45
  -4   3   7   10.62    0.43
  -4   3   7    9.19    0.48
   4   3  -7    9.57    0.47
  -4  -3  -7   10.99    0.44
   4   3  -7   10.26    0.39
  -4   3   7   10.95    0.48
   4   3  -7   10.88    0.49
   5  -3  -7   24.86    0.75
   5  -3  -7   26.02    0.96
   5   3   7   25.71    0.95
   5   3   7   26.71    0.91
  -5   3  -7   24.67    0.93
  -5   3  -7   26.32    0.86
  -5  -3   7   24.02    0.95
  -5   3  -7   25.79    0.87
   5  -3   7   27.31    0.95
  -5  -3  -7   27.26    0.91
   5   3  -7   26.51    0.85
  -5   3   7   26.54    0.96
   5   3  -7   27.65    0.97
   6   3   7    1.63    0.24
   6  -3  -7    1.61    0.15
   6  -3  -7    1.59    0.25
  -6  -3   7    1.72    0.26
   6   3   7    1.81    0.21
  -6   3  -7    1.53    0.24
  -6   3   7    1.44    0.22
   6  -3   7    1.05    0.20
   6   3  -7    2.05    0.25
   6   3  -7    1.58    0.17
   7  -3  -7    6.21    0.32
   7   3   7    6.77    0.44
  -7  -3   7    6.16    0.46
  -7   3  -7    5.92    0.42
   7  -3  -7    6.19    0.45
  -7   3   7    6.04    0.44
   7  -3   7    5.88    0.42
   7   3  -7    6.58    0.35
   8  -3  -7    0.81    0.17
   8   3   7    0.63    0.23
  -8   3  -7    0.57    0.22
  -8  -3   7    0.92    0.27
   8  -3  -7    0.76    0.26
   8  -3   7    0.91    0.28
   8   3  -7    1.02    0.20
  -8   3   7    0.37    0.23
   9   3   7    2.19    0.32
   9  -3  -7    2.28    0.38
  -9   3  -7    2.75    0.37
  -9  -3   7    1.93    0.36
   9  -3  -7    2.52    0.27
  -9   3   7    2.52    0.35
   9   3  -7    2.16    0.27
   9  -3   7    2.01    0.33
  10  -3  -7    4.81    0.53
  10  -3  -7    4.27    0.38
 -10   3  -7    3.96    0.47
 -10  -3   7    4.46    0.52
  10   3   7    4.76    0.49
  10   3  -7    4.55    0.39
  10  -3   7    4.67    0.50
 -10   3   7    5.16    0.53
   0  -3  -8    6.14    0.24
   0  -3   8    6.22    0.22
   0   3  -8    5.97    0.32
   0  -3  -8    6.27    0.23
   0   3   8    5.96    0.33
   0   3   8    5.97    0.35
   0   3  -8    6.09    0.28
   0   3  -8    5.72    0.34
  -1   3  -8    1.30    0.17
   1  -3  -8    1.65    0.12
  -1   3  -8    1.53    0.17
   1  -3  -8    1.45    0.10
  -1   3  -8    1.68    0.15
   1   3   8    1.39    0.19
   1   3   8    1.58    0.18
  -1   3   8    1.80    0.20
  -1   3   8    1.51    0.18
   1  -3   8    1.77    0.13
  -1   3   8    1.74    0.15
   1   3  -8    1.43    0.19
  -1  -3  -8    1.70    0.14
   1   3  -8    1.84    0.14
   1   3  -8    1.52    0.18
   2   3   8   74.97    2.32
  -2   3  -8   78.37    2.33
  -2   3  -8   80.99    2.20
  -2   3  -8   77.95    2.28
   2  -3  -8   80.22    2.08
   2   3   8   78.19    2.31
   2  -3  -8   80.04    2.08
   2   3  -8   78.84    2.27
   2  -3   8   80.41    2.18
  -2   3   8   78.77    2.20
   2   3  -8   77.42    2.13
   2   3  -8   77.77    2.35
  -2  -3  -8   77.41    2.16
  -2   3   8   79.68    2.30
  -2   3   8   76.47    2.29
  -3   3  -8   43.87    1.39
  -3   3  -8   44.10    1.38
  -3   3  -8   43.53    1.31
   3   3   8   44.02    1.41
   3   3   8   42.73    1.40
  -3  -3  -8   46.07    1.34
  -3   3   8   46.76    1.37
   3   3  -8   47.29    1.48
  -3   3   8   44.40    1.40
  -3   3   8   43.77    1.43
   3   3  -8   43.21    1.41
   3   3  -8   44.13    1.28
   3  -3   8   45.46    1.34
  -4   3  -8   22.79    0.85
   4  -3  -8   22.87    0.64
  -4   3  -8   22.16    0.78
   4   3   8   22.40    0.84
   4  -3  -8   23.69    0.65
  -4   3  -8   22.77    0.81
   4   3   8   21.84    0.86
   4   3  -8   23.67    0.75
  -4   3   8   23.40    0.82
  -4  -3  -8   25.21    0.82
  -4   3   8   23.24    0.89
   4   3  -8   23.39    0.88
  -4   3   8   25.11    0.86
   4  -3   8   24.13    0.83
   4   3  -8   23.39    0.89
  -5   3  -8    5.41    0.36
   5  -3  -8    4.83    0.37
   5   3   8    5.44    0.34
   5  -3  -8    5.21    0.23
   5   3   8    5.58    0.38
  -5   3  -8    5.93    0.34
  -5   3  -8    5.53    0.32
  -5  -3   8    5.39    0.39
  -5  -3  -8    5.21    0.31
   5   3  -8    5.26    0.36
   5  -3   8    5.49    0.35
   5   3  -8    5.71    0.29
  -5   3   8    5.62    0.37
  -6  -3   8   29.49    1.11
   6   3   8   30.38    1.03
   6  -3  -8   26.68    1.07
   6  -3  -8   27.80    0.86
  -6   3  -8   28.01    1.05
   6   3   8   28.93    1.07
   6   3  -8   28.08    0.94
  -6   3   8   29.77    1.09
   6  -3   8   30.69    1.08
   6   3  -8   31.13    1.09
  -7  -3   8    0.90    0.26
  -7   3  -8    0.94    0.22
   7   3   8    1.07    0.22
   7  -3  -8    1.04    0.15
   7  -3  -8    0.98    0.25
   7  -3   8    0.74    0.21
  -7   3   8    1.01    0.24
   7   3  -8    1.20    0.18
  -8   3  -8    3.26    0.37
  -8  -3   8    3.64    0.41
   8  -3  -8    3.38    0.27
   8  -3  -8    4.01    0.42
   8   3   8    2.92    0.36
  -8   3   8    3.25    0.38
   8  -3   8    4.02    0.40
   8   3  -8    3.48    0.30
  -9  -3   8    7.34    0.60
   9   3   8    6.22    0.51
   9  -3  -8    7.18    0.41
   9  -3  -8    7.56    0.60
  -9   3  -8    6.71    0.51
  -9   3   8    6.63    0.54
   9  -3   8    7.03    0.53
   9   3  -8    7.12    0.43
  10   3   8    0.12    0.27
  10  -3  -8    0.01    0.32
 -10  -3   8    0.41    0.31
 -10   3  -8    0.07    0.28
  10  -3  -8    0.50    0.22
  10   3  -8    0.43    0.22
 -10   3   8    0.07    0.28
  10  -3   8    0.22    0.27
   0   3   9    9.25    0.44
   0   3   9    8.21    0.43
   0   3  -9    9.14    0.36
   0   3  -9    8.26    0.44
   0  -3  -9    9.24    0.33
   0   3  -9    8.87    0.42
  -1   3  -9   23.31    0.87
   1  -3  -9   25.79    0.74
   1   3   9   25.38    0.91
   1  -3  -9   25.44    0.78
  -1   3  -9   25.23    0.92
   1  -3  -9   25.87    0.73
  -1   3  -9   26.12    0.82
   1   3   9   25.99    0.91
  -1   3   9   26.72    0.94
   1   3  -9   28.15    0.98
  -1  -3  -9   25.89    0.81
  -1   3   9   25.80    0.92
   1   3  -9   26.55    0.91
   1  -3   9   27.41    0.81
   1   3  -9   26.19    0.82
   2   3   9   11.08    0.50
  -2   3  -9   11.49    0.46
  -2   3  -9   11.33    0.51
   2  -3  -9   11.12    0.34
  -2   3  -9   11.78    0.51
   2   3   9   11.51    0.53
   2  -3  -9   10.43    0.34
  -2   3   9   11.54    0.46
   2   3  -9   11.37    0.50
   2   3  -9   10.74    0.53
   2  -3   9   11.35    0.42
  -2   3   9   11.13    0.52
  -2  -3  -9   12.29    0.44
   2   3  -9   10.72    0.40
  -2   3   9   11.00    0.49
  -3   3  -9   21.77    0.81
  -3   3  -9   21.33    0.75
   3   3   9   22.17    0.84
  -3   3  -9   21.82    0.81
   3   3   9   21.52    0.82
   3   3  -9   20.09    0.79
  -3   3   9   21.38    0.77
   3   3  -9   20.75    0.67
   3  -3   9   22.24    0.73
   3   3  -9   20.65    0.83
  -3  -3  -9   22.82    0.73
  -3   3   9   22.38    0.76
  -3   3   9   20.15    0.80
  -4   3  -9   27.31    0.93
  -4   3  -9   28.79    1.01
  -4   3  -9   28.59    0.98
   4   3   9   27.93    1.00
   4   3   9   27.56    1.02
  -4   3   9   29.20    1.00
   4   3  -9   27.90    1.04
   4  -3   9   30.92    0.97
  -4   3   9   27.87    0.97
  -4  -3  -9   28.08    0.94
   4   3  -9   30.15    0.88
   4   3  -9   29.32    1.04
  -4   3   9   26.85    1.02
  -5   3  -9    8.41    0.43
   5   3   9    8.46    0.45
  -5   3  -9    8.56    0.43
  -5   3  -9    8.78    0.48
   5   3   9    8.21    0.48
   5   3  -9    8.41    0.47
  -5   3   9    8.26    0.45
   5   3  -9    8.54    0.36
   5  -3   9    8.37    0.44
   5   3  -9    7.91    0.47
  -5  -3  -9    7.88    0.42
   6   3   9    3.52    0.30
   6  -3  -9    3.12    0.19
   6  -3  -9    3.02    0.33
   6   3   9    3.30    0.33
  -6   3  -9    3.46    0.33
  -6  -3   9    3.41    0.36
  -6  -3  -9    3.63    0.30
   6  -3   9    3.81    0.33
   6   3  -9    3.79    0.33
  -6   3   9    3.58    0.34
   6   3  -9    3.27    0.24
  -7   3  -9   19.62    0.87
   7  -3  -9   22.42    0.94
   7  -3  -9   20.92    0.69
  -7  -3   9   21.48    0.95
   7   3   9   20.08    0.90
  -7   3   9   23.15    0.97
   7  -3   9   23.44    0.94
   7   3  -9   22.58    0.80
  -8   3  -9    4.77    0.45
   8   3   9    4.88    0.46
   8  -3  -9    5.97    0.53
  -8  -3   9    6.01    0.52
   8  -3  -9    4.82    0.31
  -8   3   9    5.40    0.48
   8   3  -9    4.94    0.33
   8  -3   9    5.84    0.45
   9   3   9    6.63    0.55
  -9   3  -9    6.43    0.51
   9  -3  -9    6.19    0.56
   9  -3  -9    7.29    0.40
  -9  -3   9    6.09    0.58
   9   3  -9    7.00    0.41
   9  -3   9    6.63    0.52
  -9   3   9    6.11    0.55
 -10   3  -9    0.30    0.28
  10  -3  -9   -0.06    0.32
  10  -3   9    0.42    0.31
 -10   3   9   -0.26    0.28
   0   3 -10    1.20    0.14
   0   3 -10    0.83    0.16
   0  -3 -10    1.24    0.12
   0   3 -10    1.06    0.18
   0   3  10    0.73    0.16
   0   3  10    1.11    0.18
  -1   3 -10   45.81    1.47
   1   3  10   45.86    1.51
   1   3  10   47.95    1.51
  -1   3 -10   47.28    1.54
  -1   3 -10   47.20    1.39
   1  -3 -10   48.10    1.29
  -1  -3 -10   47.23    1.35
  -1   3  10   46.79    1.52
   1   3 -10   48.12    1.56
   1   3 -10   46.56    1.36
   1   3 -10   47.28    1.48
  -1   3  10   48.27    1.51
   2  -3 -10   21.45    0.61
  -2   3 -10   19.85    0.81
   2   3  10   21.68    0.83
   2   3  10   20.73    0.81
   2  -3 -10   20.14    0.60
  -2   3 -10   22.43    0.81
  -2   3 -10   22.16    0.74
   2   3 -10   21.01    0.68
  -2  -3 -10   21.18    0.71
  -2   3  10   21.62    0.73
   2   3 -10   20.08    0.79
   2  -3  10   21.56    0.70
  -2   3  10   20.91    0.79
   2   3 -10   21.92    0.85
  -2   3  10   21.44    0.82
  -3   3 -10    4.57    0.32
  -3   3 -10    4.85    0.33
  -3   3 -10    4.90    0.30
   3   3  10    5.16    0.34
   3   3  10    4.99    0.36
   3   3 -10    4.54    0.32
  -3  -3 -10    4.93    0.29
   3   3 -10    5.05    0.24
   3  -3  10    4.48    0.27
   3   3 -10    4.60    0.34
  -3   3  10    4.20    0.30
  -3   3  10    4.71    0.34
  -3   3  10    4.79    0.30
  -4   3 -10   12.81    0.60
  -4   3 -10   13.68    0.59
   4   3  10   13.00    0.59
   4   3  10   12.93    0.63
  -4   3 -10   13.95    0.57
  -4   3  10   13.66    0.58
   4  -3  10   13.56    0.56
   4   3 -10   13.87    0.48
   4   3 -10   12.33    0.63
  -4  -3 -10   13.75    0.56
  -4   3  10   14.03    0.59
  -4   3  10   13.35    0.62
   4   3 -10   13.96    0.63
  -5   3 -10   11.51    0.53
  -5   3 -10   11.66    0.52
   5   3  10   11.23    0.55
   5   3  10   11.37    0.59
  -5   3 -10   10.77    0.56
   5  -3 -10   10.93    0.36
   5   3 -10   12.51    0.46
   5   3 -10   10.49    0.57
  -5   3  10   11.72    0.57
   5   3 -10   11.36    0.59
  -5  -3 -10   12.08    0.53
   5  -3  10   12.45    0.55
  -6   3 -10    1.00    0.23
   6   3  10    1.03    0.24
   6  -3 -10    0.85    0.25
   6  -3 -10    1.16    0.13
   6   3  10    1.43    0.22
   6  -3  10    0.93    0.21
  -6  -3 -10    1.10    0.21
   6   3 -10    1.21    0.24
   6   3 -10    1.00    0.15
   6   3 -10    1.09    0.23
  -6   3  10    0.85    0.23
  -7   3 -10    0.00    0.19
   7  -3 -10    0.12    0.11
   7  -3 -10    0.19    0.23
   7   3  10    0.16    0.19
   7   3 -10    0.18    0.14
  -7   3  10    0.30    0.24
   7  -3  10    0.04    0.18
   8  -3 -10    4.58    0.30
   8   3  10    5.26    0.47
  -8  -3  10    4.86    0.49
  -8   3 -10    5.23    0.46
   8  -3 -10    5.82    0.52
   8   3 -10    4.71    0.33
  -8   3  10    5.13    0.49
   8  -3  10    4.92    0.44
  -9   3 -10    1.62    0.33
   9  -3 -10    2.28    0.24
   9  -3 -10    1.94    0.39
   9   3  10    1.60    0.34
  -9  -3  10    1.36    0.32
   9  -3  10    2.29    0.38
   9   3 -10    2.04    0.27
  -9   3  10    2.20    0.41
 -10   3 -10   -0.78    0.28
  10  -3 -10    0.09    0.32
  10  -3  10    0.04    0.35
   0   3  11    5.09    0.34
   0  -3 -11    5.17    0.24
   0   3 -11    5.10    0.36
   0   3  11    4.81    0.34
   0   3 -11    4.81    0.27
   0   3 -11    4.71    0.33
  -1   3 -11   31.04    0.99
   1  -3 -11   31.06    0.89
   1   3  11   31.49    1.11
   1   3  11   29.86    1.10
  -1   3 -11   32.92    1.09
  -1   3 -11   30.57    1.12
  -1  -3 -11   30.80    0.95
  -1   3  11   32.53    1.12
   1   3 -11   31.38    1.07
   1   3 -11   30.45    0.96
  -1   3  11   31.78    1.10
   1   3 -11   31.82    1.15
   2  -3 -11    0.57    0.07
  -2   3 -11    0.77    0.18
   2   3  11    0.52    0.15
  -2   3 -11    0.69    0.16
  -2   3 -11    0.78    0.14
   2   3  11    0.33    0.16
  -2   3  11    0.35    0.14
  -2  -3 -11    0.48    0.12
   2   3 -11    0.52    0.18
   2   3 -11    0.67    0.11
  -2   3  11    0.55    0.18
   2   3 -11    0.41    0.15
  -3   3 -11   30.62    1.09
  -3   3 -11   29.68    1.00
   3   3  11   30.30    1.10
   3   3  11   30.08    1.09
  -3   3 -11   29.54    1.06
   3   3 -11   29.66    1.07
   3   3 -11   30.21    0.92
  -3   3  11   31.35    1.08
  -3  -3 -11   29.10    0.98
   3   3 -11   30.77    1.14
  -3   3  11   31.48    1.10
  -3   3  11   31.36    1.03
  -4   3 -11    2.29    0.23
   4   3  11    2.24    0.28
  -4   3 -11    2.65    0.28
   4   3  11    2.51    0.27
  -4   3 -11    1.90    0.25
  -4   3  11    2.55    0.27
  -4  -3 -11    2.61    0.24
  -4   3  11    2.54    0.25
   4   3 -11    2.64    0.31
  -4   3  11    2.36    0.29
   4   3 -11    2.78    0.29
   4  -3  11    2.86    0.25
   4   3 -11    2.46    0.19
  -5   3 -11   10.54    0.56
   5   3  11   10.77    0.55
  -5   3 -11   11.07    0.52
   5   3  11    9.37    0.56
  -5   3 -11   11.09    0.55
  -5  -3 -11   10.82    0.51
   5   3 -11   11.06    0.58
   5   3 -11   10.48    0.42
   5  -3  11   11.10    0.52
  -5   3  11   11.49    0.57
   5   3 -11   10.38    0.57
  -5   3  11   10.07    0.56
   6   3  11    2.49    0.33
  -6   3 -11    3.34    0.35
   6  -3 -11    2.83    0.18
   6   3  11    3.15    0.32
   6  -3 -11    3.07    0.35
   6   3 -11    3.18    0.34
   6   3 -11    2.63    0.33
  -6   3  11    2.30    0.31
  -6  -3 -11    2.76    0.30
   6   3 -11    2.70    0.22
   6  -3  11    3.04    0.32
   7  -3 -11    3.44    0.22
  -7   3 -11    4.05    0.39
   7  -3 -11    4.63    0.44
   7   3  11    3.52    0.40
  -7   3  11    3.34    0.40
   7   3 -11    3.11    0.38
   7  -3  11    3.66    0.37
   7   3 -11    3.27    0.26
   8   3  11    3.95    0.43
  -8   3 -11    3.92    0.43
   8  -3 -11    3.88    0.28
   8  -3 -11    3.90    0.43
   8   3 -11    4.12    0.31
   8  -3  11    4.28    0.43
  -8   3  11    4.18    0.47
   9  -3 -11    0.16    0.30
   9  -3 -11    0.20    0.17
   9   3  11    0.35    0.29
  -9   3 -11    0.44    0.29
  -9   3  11   -0.26    0.31
   9  -3  11    0.42    0.28
   9   3 -11    0.29    0.19
   0   3 -12    6.50    0.39
   0   3 -12    6.57    0.33
   0   3  12    7.03    0.42
   0  -3 -12    6.37    0.28
   0   3 -12    6.12    0.42
   0   3  12    6.21    0.40
  -1   3 -12    7.66    0.38
  -1   3 -12    7.34    0.42
  -1   3 -12    7.94    0.47
   1   3  12    7.43    0.44
   1   3  12    8.25    0.46
   1  -3 -12    7.14    0.29
   1   3 -12    7.66    0.43
   1   3 -12    6.88    0.33
  -1   3  12    7.43    0.44
   1   3 -12    7.32    0.45
  -1   3  12    7.05    0.44
  -1  -3 -12    7.39    0.33
   2   3  12    1.31    0.21
   2   3  12    1.36    0.24
  -2   3 -12    1.18    0.20
  -2   3 -12    1.50    0.22
  -2   3 -12    1.32    0.18
   2  -3 -12    1.52    0.12
   2   3 -12    1.65    0.26
  -2   3  12    1.60    0.25
   2   3 -12    1.49    0.22
   2   3 -12    1.43    0.16
  -2   3  12    1.41    0.22
  -2  -3 -12    1.38    0.17
  -3   3 -12    8.09    0.42
   3   3  12    7.55    0.46
  -3   3 -12    8.29    0.48
   3   3  12    8.62    0.50
  -3   3 -12    8.96    0.48
  -3  -3 -12    8.11    0.40
  -3   3  12    8.04    0.45
   3   3 -12    8.44    0.47
   3   3 -12    8.07    0.35
   3   3 -12    8.25    0.50
  -3   3  12    7.22    0.46
  -4   3 -12    1.17    0.23
  -4   3 -12    1.10    0.20
  -4   3 -12    1.42    0.23
   4   3  12    1.70    0.27
   4   3  12    1.70    0.25
  -4   3  12    1.40    0.21
  -4  -3 -12    1.46    0.20
   4   3 -12    1.76    0.16
  -4   3  12    1.56    0.24
  -4   3  12    0.95    0.24
   4   3 -12    1.14    0.23
   4   3 -12    1.95    0.27
  -5   3 -12    8.20    0.50
  -5   3 -12    8.01    0.45
   5   3  12    7.99    0.51
   5   3  12    7.57    0.47
  -5   3 -12    7.59    0.47
   5   3 -12    8.11    0.51
   5   3 -12    7.23    0.33
  -5   3  12    8.21    0.49
   5   3 -12    7.90    0.52
  -5  -3 -12    7.47    0.43
  -5   3  12    7.86    0.51
  -6   3 -12    3.43    0.36
   6  -3 -12    3.32    0.18
   6   3  12    3.22    0.34
   6  -3 -12    3.91    0.41
   6   3  12    3.70    0.39
   6   3 -12    3.96    0.39
  -6  -3 -12    3.72    0.33
  -6   3  12    3.74    0.38
   6   3 -12    3.35    0.37
   6   3 -12    3.30    0.24
  -7   3 -12    8.11    0.55
   7   3  12    8.87    0.59
   7  -3 -12    9.74    0.61
   7  -3 -12    8.88    0.35
   7  -3  12    8.62    0.54
   7   3 -12    8.66    0.42
   7   3 -12    8.83    0.59
  -7   3  12   10.18    0.62
  -8   3 -12    2.33    0.36
   8  -3 -12    2.34    0.40
   8   3  12    1.76    0.35
   8   3 -12    2.32    0.26
   8  -3  12    2.95    0.39
   8   3 -12    2.52    0.39
  -8   3  12    3.09    0.41
   9  -3 -12    2.01    0.23
  -9   3  12    1.54    0.40
   9  -3  12    1.98    0.35
   0   3 -13   29.01    0.96
   0   3  13   30.22    1.09
   0   3  13   30.22    1.12
   0   3 -13   30.55    1.15
   0   3 -13   28.85    1.06
   0  -3 -13   29.48    0.90
   1  -3 -13    2.40    0.17
   1   3  13    1.74    0.27
  -1   3 -13    2.25    0.29
  -1   3 -13    2.35    0.22
  -1   3 -13    2.53    0.28
   1   3  13    2.41    0.27
   1   3 -13    2.34    0.20
   1   3 -13    2.48    0.31
   1   3 -13    2.17    0.26
  -1   3  13    2.26    0.28
  -1   3  13    2.49    0.27
  -1  -3 -13    2.56    0.20
   2  -3 -13    4.93    0.22
  -2   3 -13    5.14    0.40
  -2   3 -13    5.24    0.32
   2   3  13    5.55    0.40
  -2   3 -13    4.97    0.37
   2   3  13    5.40    0.39
  -2   3  13    5.03    0.37
   2   3 -13    5.02    0.28
   2   3 -13    5.23    0.37
   2   3 -13    5.06    0.40
  -2   3  13    5.28    0.39
  -2  -3 -13    5.54    0.31
   3   3  13   10.10    0.56
   3   3  13    9.13    0.53
   3  -3 -13    9.85    0.32
  -3   3 -13   10.03    0.49
  -3   3 -13   10.31    0.56
  -3   3 -13   11.51    0.56
   3   3 -13   10.73    0.57
   3   3 -13   11.62    0.62
  -3   3  13   10.66    0.55
  -3   3  13   11.62    0.59
  -3  -3 -13   10.42    0.49
   3   3 -13   11.04    0.44
  -4   3 -13    0.74    0.20
  -4   3 -13    1.31    0.25
   4   3  13    0.93    0.23
  -4   3 -13    1.14    0.21
   4   3  13    0.84    0.22
  -4   3  13    1.10    0.23
   4   3 -13    0.84    0.22
  -4  -3 -13    1.03    0.19
   4   3 -13    1.27    0.25
  -4   3  13    1.25    0.25
   4   3 -13    1.12    0.14
   5   3  13    0.20    0.20
  -5   3 -13   -0.15    0.17
  -5   3 -13    0.11    0.19
  -5   3 -13    0.00    0.19
   5   3  13    0.10    0.17
   5   3 -13   -0.17    0.17
  -5   3  13    0.21    0.22
   5   3 -13    0.24    0.20
   5   3 -13    0.36    0.12
  -5  -3 -13    0.27    0.17
  -6   3 -13    0.72    0.26
   6   3  13    0.65    0.26
   6  -3 -13    0.64    0.26
   6   3  13    0.61    0.25
   6   3 -13    0.59    0.25
  -6   3  13    0.34    0.23
   6   3 -13    0.47    0.14
  -6  -3 -13    0.65    0.22
   6   3 -13    0.37    0.20
   7   3  13   21.27    0.99
   7  -3 -13   20.79    0.97
  -7   3 -13   21.16    0.95
   7   3 -13   20.83    0.75
   7   3 -13   22.27    0.99
  -7   3  13   21.76    0.98
   8  -3 -13    2.47    0.21
   8   3  13    2.22    0.39
   8   3 -13    2.53    0.40
  -8   3  13    2.69    0.41
   8   3 -13    2.58    0.26
   0   3  14    8.00    0.50
   0   3 -14    8.71    0.50
   0   3  14    8.75    0.51
   0   3 -14    7.67    0.39
   0   3 -14    7.64    0.52
   0  -3 -14    8.41    0.35
   1   3  14   19.39    0.82
  -1   3 -14   17.94    0.69
  -1   3 -14   20.18    0.81
   1   3  14   17.43    0.80
  -1   3 -14   18.30    0.84
   1  -3 -14   17.86    0.59
   1   3 -14   19.39    0.87
  -1   3  14   18.92    0.81
  -1   3  14   18.53    0.81
   1   3 -14   19.28    0.80
   1   3 -14   18.37    0.67
  -1  -3 -14   18.25    0.65
  -2   3 -14    3.84    0.29
   2   3  14    3.67    0.37
  -2   3 -14    4.15    0.39
   2   3  14    3.19    0.33
   2  -3 -14    3.66    0.19
  -2   3 -14    3.61    0.34
  -2   3  14    4.25    0.37
  -2   3  14    4.29    0.39
   2   3 -14    3.71    0.39
  -2  -3 -14    4.16    0.28
   2   3 -14    4.31    0.36
   2   3 -14    3.71    0.25
  -3   3 -14    4.56    0.39
   3   3  14    3.04    0.34
   3  -3 -14    3.42    0.17
   3   3  14    3.80    0.39
  -3   3 -14    4.03    0.31
  -3   3 -14    3.68    0.38
  -3   3  14    4.16    0.37
  -3   3  14    3.49    0.34
   3   3 -14    3.88    0.39
   3   3 -14    4.07    0.37
  -3  -3 -14    4.54    0.31
   3   3 -14    4.06    0.25
   4   3  14    3.40    0.36
   4   3  14    3.97    0.39
  -4   3 -14    3.61    0.36
  -4   3 -14    3.50    0.38
  -4   3 -14    3.38    0.32
   4   3 -14    3.26    0.35
   4   3 -14    3.49    0.39
  -4   3  14    4.56    0.41
  -4  -3 -14    3.17    0.30
  -4   3  14    4.03    0.35
   4   3 -14    3.40    0.23
  -5   3 -14   10.68    0.57
   5   3  14   10.10    0.60
  -5   3 -14   11.21    0.63
   5   3  14   11.28    0.64
  -5   3 -14   11.06    0.61
   5   3 -14   11.51    0.66
   5   3 -14   10.16    0.60
   5   3 -14   10.09    0.43
  -5  -3 -14   10.84    0.55
  -5   3  14   11.13    0.63
   6   3  14    2.01    0.32
   6   3  14    1.96    0.35
   6   3 -14    2.27    0.35
   6   3 -14    2.65    0.22
   6   3 -14    1.94    0.33
  -6  -3 -14    2.25    0.32
   7   3  14    6.30    0.55
   7   3 -14    6.58    0.55
   7   3 -14    6.02    0.34
   8  -3 -14    4.02    0.25
   0   3 -15   37.57    1.43
   0   3 -15   38.22    1.21
   0   3  15   37.81    1.40
   0   3  15   39.92    1.38
   0  -3 -15   37.14    1.14
   0   3 -15   38.02    1.34
   1   3  15    5.42    0.43
  -1   3 -15    5.74    0.43
  -1   3 -15    5.64    0.35
   1  -3 -15    5.22    0.27
   1   3  15    5.69    0.44
  -1   3 -15    5.81    0.46
   1   3 -15    5.88    0.33
  -1   3  15    5.24    0.41
   1   3 -15    5.97    0.46
   1   3 -15    5.44    0.41
  -1   3  15    5.85    0.43
  -1  -3 -15    5.48    0.31
  -2   3 -15    3.65    0.30
  -2   3 -15    4.04    0.38
   2   3  15    3.92    0.37
   2  -3 -15    3.37    0.20
  -2   3 -15    3.58    0.39
   2   3  15    3.50    0.38
   2   3 -15    3.34    0.25
   2   3 -15    4.06    0.37
  -2   3  15    3.24    0.35
   2   3 -15    3.40    0.39
  -2  -3 -15    3.68    0.27
  -2   3  15    3.30    0.36
  -3   3 -15   12.60    0.64
   3  -3 -15   11.49    0.38
  -3   3 -15   11.62    0.56
   3   3  15   11.07    0.63
   3   3  15   10.21    0.62
  -3   3 -15   12.06    0.67
   3   3 -15   11.63    0.47
  -3  -3 -15   11.46    0.53
  -3   3  15   11.81    0.63
   3   3 -15    9.77    0.62
  -3   3  15   12.41    0.64
   3   3 -15   11.21    0.61
  -4   3 -15    3.55    0.38
  -4   3 -15    3.13    0.36
   4   3  15    2.55    0.35
  -4   3 -15    2.84    0.31
   4   3  15    2.97    0.36
  -4   3  15    3.55    0.39
  -4   3  15    2.84    0.34
   4   3 -15    2.78    0.37
   4   3 -15    2.95    0.23
   4   3 -15    3.24    0.36
  -4  -3 -15    3.06    0.30
   5   3  15    0.74    0.26
  -5   3 -15    1.14    0.24
   5   3  15    0.39    0.26
  -5   3 -15    0.96    0.27
   5   3 -15    0.52    0.24
   5   3 -15    1.09    0.29
  -5  -3 -15    0.81    0.23
   5   3 -15    1.09    0.16
   6   3  15    1.53    0.34
   6   3  15    1.67    0.32
   6   3 -15    1.58    0.35
   6   3 -15    1.87    0.20
   6   3 -15    1.30    0.31
  -6  -3 -15    2.10    0.31
   7   3  15   14.99    0.85
   7   3 -15   15.64    0.59
   7   3 -15   13.84    0.82
   0   3 -16    5.57    0.50
   0  -3 -16    4.73    0.29
   0   3  16    5.55    0.44
   0   3  16    5.28    0.45
   0   3 -16    4.78    0.32
   0   3 -16    5.54    0.42
   1  -3 -16    2.05    0.18
   1   3  16    1.81    0.32
  -1   3 -16    2.27    0.25
  -1   3 -16    1.38    0.29
  -1   3 -16    1.40    0.27
   1   3  16    2.02    0.31
   1   3 -16    1.68    0.32
  -1   3  16    2.19    0.31
   1   3 -16    1.81    0.28
   1   3 -16    2.34    0.22
  -1  -3 -16    2.17    0.23
  -1   3  16    1.68    0.28
   2   3  16    0.45    0.24
   2   3  16    0.37    0.22
  -2   3 -16    0.93    0.20
  -2   3 -16    0.55    0.25
  -2   3 -16    0.70    0.24
   2  -3 -16    0.81    0.13
   2   3 -16    0.86    0.17
  -2  -3 -16    0.70    0.17
   2   3 -16    0.43    0.24
  -2   3  16    0.50    0.24
   2   3 -16    0.61    0.21
  -2   3  16    0.53    0.21
   3   3  16    2.03    0.35
  -3   3 -16    1.71    0.31
   3   3  16    1.81    0.31
   3  -3 -16    2.24    0.16
  -3   3 -16    2.48    0.28
   3   3 -16    2.32    0.34
   3   3 -16    1.79    0.34
  -3  -3 -16    1.65    0.23
  -3   3  16    1.59    0.28
   3   3 -16    2.06    0.20
   4   3  16    0.71    0.27
  -4   3 -16    0.21    0.18
  -4   3 -16    0.24    0.25
   4   3  16    0.18    0.22
   4   3 -16    0.41    0.24
   4   3 -16    0.27    0.14
   4   3 -16    0.03    0.20
  -4   3  16    0.66    0.23
  -4  -3 -16    0.24    0.18
  -5   3 -16    1.14    0.30
  -5   3 -16    0.48    0.24
   5   3  16    0.54    0.28
   5   3  16    0.47    0.26
   5   3 -16    0.76    0.16
  -5  -3 -16    0.75    0.25
   5   3 -16    0.67    0.28
   5   3 -16    1.10    0.29
   6   3  16   10.44    0.71
   6   3  16   10.41    0.67
   6   3 -16   11.49    0.70
  -6  -3 -16   10.84    0.62
   6   3 -16   10.06    0.68
   6   3 -16   10.66    0.47
   0   3  17    2.00    0.32
   0   3 -17    2.10    0.33
   0   3 -17    2.09    0.24
   0   3 -17    2.18    0.32
   0  -3 -17    2.33    0.22
  -1   3 -17    9.45    0.48
   1   3  17    8.60    0.58
   1  -3 -17    9.59    0.40
  -1   3 -17    8.44    0.61
  -1   3 -17    8.39    0.55
   1   3  17    8.69    0.59
  -1   3  17    8.57    0.57
   1   3 -17    8.18    0.61
   1   3 -17    9.24    0.55
  -1  -3 -17    8.93    0.42
   1   3 -17    7.68    0.42
   2  -3 -17    2.50    0.19
   2   3  17    2.69    0.37
  -2   3 -17    2.17    0.38
   2   3  17    1.62    0.31
  -2   3 -17    2.26    0.28
   2   3 -17    2.49    0.24
   2   3 -17    1.67    0.30
  -2   3  17    1.58    0.30
  -2  -3 -17    1.76    0.24
   2   3 -17    1.79    0.34
   3   3  17    4.82    0.46
  -3   3 -17    5.00    0.38
   3  -3 -17    4.60    0.24
   3   3  17    4.56    0.47
  -3   3 -17    4.63    0.48
  -3  -3 -17    5.00    0.37
   3   3 -17    3.98    0.29
  -3   3  17    4.70    0.45
   3   3 -17    4.70    0.45
   3   3 -17    3.75    0.45
  -4   3 -17    1.76    0.27
   4   3  17    1.69    0.35
  -4   3 -17    0.76    0.30
   4   3  17    1.04    0.29
  -4  -3 -17    1.73    0.27
  -4   3  17    1.29    0.31
   4   3 -17    1.46    0.20
   4   3 -17    1.24    0.34
   4   3 -17    1.25    0.28
   5   3  17    1.50    0.36
   5   3  17    0.79    0.30
  -5   3 -17    1.61    0.36
   5   3 -17    1.09    0.31
   5   3 -17    1.26    0.34
   5   3 -17    1.39    0.19
  -5  -3 -17    2.15    0.31
   0   3 -18    0.73    0.31
   0   3  18    0.60    0.25
   0   3 -18    0.73    0.20
   0  -3 -18    0.38    0.17
  -1   3 -18    7.50    0.45
   1   3  18    7.69    0.55
  -1   3 -18    7.05    0.58
   1  -3 -18    7.05    0.36
  -1  -3 -18    7.96    0.42
   1   3 -18    7.75    0.42
   1   3 -18    8.17    0.56
   1   3 -18    7.57    0.61
  -1   3  18    7.23    0.55
   2  -3 -18    2.46    0.21
  -2   3 -18    1.82    0.37
   2   3  18    2.88    0.38
  -2   3 -18    3.02    0.30
   2   3 -18    1.95    0.33
  -2  -3 -18    2.26    0.26
  -2   3  18    2.38    0.36
   2   3 -18    2.82    0.27
   2   3 -18    2.37    0.40
   3  -3 -18    0.40    0.13
  -3   3 -18    0.19    0.23
   3   3  18    0.13    0.27
  -3   3 -18    0.44    0.29
   3   3 -18   -0.20    0.24
  -3  -3 -18    0.14    0.20
   3   3 -18   -0.08    0.23
   3   3 -18    0.22    0.16
  -3   3  18    0.03    0.24
   4   3  18    0.05    0.25
  -4   3 -18   -0.42    0.26
   4   3  18    0.34    0.30
  -4   3 -18    0.01    0.26
   4   3 -18   -0.16    0.22
  -4  -3 -18    0.07    0.20
  -4   3  18   -0.24    0.24
   4   3 -18    0.05    0.15
   4   3 -18   -0.15    0.25
   0   3  19    5.11    0.50
   0   3 -19    4.63    0.54
   0   3 -19    5.28    0.39
   0  -3 -19    5.52    0.35
  -1   3 -19    0.82    0.34
   1  -3 -19    1.17    0.20
  -1   3 -19    1.45    0.25
  -1  -3 -19    0.83    0.19
   1   3 -19    1.25    0.22
  -1   3  19    1.43    0.33
   1   3 -19    0.65    0.32
  -2   3 -19    2.54    0.31
   2  -3 -19    3.26    0.25
  -2   3  19    2.24    0.38
   3  -3 -19    7.92    0.36
  -3   3  19    7.03    0.58
   0   4   0   39.64    1.18
   0   4   0   42.49    1.22
   0  -4   0   41.10    1.19
   0   4   0   42.25    1.20
   0   4   0   43.96    1.27
   1   4   0    0.02    0.07
  -1   4   0    0.02    0.07
  -1   4   0   -0.08    0.06
   1   4   0    0.10    0.07
   1  -4   0   -0.06    0.06
   1   4   0    0.04    0.06
  -1   4   0   -0.03    0.06
  -1  -4   0   -0.08    0.05
   1   4   0   -0.01    0.06
  -1   4   0    0.04    0.07
   2   4   0    1.64    0.17
   2   4   0    1.69    0.14
  -2   4   0    1.49    0.15
  -2  -4   0    1.85    0.14
   2   4   0    1.78    0.14
   2  -4   0    1.64    0.14
  -2   4   0    1.82    0.16
  -2   4   0    1.92    0.14
   2   4   0    1.69    0.13
  -3   4   0    0.56    0.11
   3  -4   0    0.57    0.10
   3   4   0    0.44    0.10
   3   4   0    0.61    0.12
   3  -4   0    0.69    0.13
   3   4   0    0.65    0.10
  -3  -4   0    0.65    0.10
  -4  -4   0    4.58    0.24
   4   4   0    3.92    0.25
   4   4   0    4.13    0.24
   4   4   0    3.91    0.24
  -4   4   0    4.43    0.19
   4  -4   0    3.54    0.27
   4  -4   0    3.69    0.24
  -4   4   0    4.63    0.28
  -4  -4   0    3.54    0.24
   5  -4   0   80.08    2.35
  -5   4   0   78.44    2.31
   5   4   0   78.62    2.22
  -5  -4   0   78.43    2.27
   5  -4   0   78.11    2.23
   5   4   0   78.72    2.32
   5   4   0   78.95    2.27
   6  -4   0    3.89    0.33
   6  -4   0    3.65    0.28
   6   4   0    3.85    0.26
   6   4   0    3.99    0.29
  -6   4   0    4.26    0.32
  -6  -4   0    3.55    0.29
   6   4   0    4.36    0.29
   7   4   0    7.90    0.41
  -7  -4   0    7.87    0.45
   7   4   0    7.61    0.42
  -7   4   0    8.24    0.48
   7  -4   0    7.60    0.49
   7  -4   0    8.56    0.44
   7   4   0    8.23    0.46
   8  -4   0    0.02    0.16
   8   4   0    0.32    0.18
  -8   4   0    0.09    0.18
  -8  -4   0    0.12    0.19
   8  -4   0    0.22    0.16
   8   4   0    0.10    0.16
   9  -4   0   38.22    1.35
   9   4   0   38.89    1.35
   9  -4   0   38.99    1.49
   9   4   0   39.25    1.41
  -9  -4   0   39.68    1.43
  10  -4   0    2.39    0.40
 -10  -4   0    2.19    0.38
  10  -4   0    2.17    0.34
 -10   4   0    2.32    0.36
  10   4   0    2.27    0.35
  10   4   0    1.81    0.31
  11  -4   0    1.41    0.40
 -11   4   0    0.84    0.33
  11   4   0    1.23    0.36
  11  -4   0    1.33    0.34
   0   4  -1   26.88    0.80
   0   4   1   27.17    0.79
   0   4  -1   26.96    0.80
   0   4   1   25.62    0.82
   0   4   1   25.33    0.78
   0  -4  -1   25.03    0.78
   0   4   1   27.88    0.86
   0   4  -1   28.31    0.82
   0  -4   1   26.47    0.80
   0   4  -1   27.78    0.86
   1   4   1  111.45    3.07
  -1   4  -1  114.56    3.04
  -1   4  -1  105.09    2.95
   1  -4  -1   97.85    2.89
   1   4   1  108.05    2.98
   1   4   1  108.78    2.91
  -1   4  -1  111.88    2.91
  -1  -4   1  108.21    2.90
  -1   4  -1  111.65    2.96
   1  -4   1  111.48    2.98
  -1   4   1  107.23    3.09
  -1  -4  -1  110.87    2.96
   1   4  -1  111.16    3.00
   1   4  -1  110.99    3.13
  -1   4   1  112.56    3.00
   1   4  -1  113.54    3.00
  -1   4   1  109.30    3.05
  -2  -4   1   59.46    1.70
   2   4   1   60.91    1.76
  -2   4  -1   61.37    1.70
   2   4   1   60.30    1.71
   2   4   1   61.67    1.82
   2  -4  -1   63.75    1.71
  -2   4  -1   60.66    1.76
   2   4   1   62.65    1.70
  -2   4  -1   63.88    1.77
  -2   4   1   62.54    1.80
   2  -4   1   63.91    1.76
   2   4  -1   61.81    1.76
  -2  -4  -1   65.96    1.75
   2  -4   1   64.31    1.80
   2   4  -1   61.24    1.74
  -2   4   1   60.69    1.81
   2   4  -1   64.03    1.76
   2   4  -1   61.48    1.85
  -2   4   1   63.34    1.78
  -3   4  -1   40.62    1.29
  -3   4  -1   42.74    1.22
  -3  -4   1   44.22    1.23
   3   4   1   41.37    1.27
   3   4   1   42.66    1.32
   3   4   1   43.10    1.24
   3   4  -1   43.26    1.25
   3   4  -1   43.85    1.32
  -3  -4  -1   40.94    1.22
   3  -4   1   42.85    1.29
   3   4  -1   41.10    1.22
  -3   4   1   42.65    1.28
   3   4  -1   42.68    1.24
   3  -4   1   39.61    1.23
  -3  -4  -1   42.65    1.22
  -4  -4   1   15.67    0.59
  -4   4  -1   16.43    0.51
   4  -4  -1   15.62    0.56
  -4   4  -1   16.41    0.63
   4   4   1   16.62    0.60
  -4  -4   1   16.02    0.56
   4   4   1   15.72    0.61
   4   4   1   16.60    0.58
   4  -4  -1   16.58    0.65
  -4   4   1   17.50    0.53
  -4  -4  -1   16.38    0.59
   4  -4   1   16.50    0.65
   4   4  -1   16.53    0.63
  -4   4   1   17.65    0.64
  -4  -4  -1   17.08    0.59
   4  -4   1   15.95    0.60
   4   4  -1   16.82    0.59
   4   4  -1   17.18    0.60
  -5   4  -1    3.60    0.29
   5   4   1    3.60    0.26
  -5  -4   1    3.80    0.27
   5   4   1    3.65    0.25
   5  -4  -1    3.43    0.25
   5   4   1    3.65    0.25
   5  -4  -1    3.66    0.30
  -5  -4  -1    3.63    0.25
  -5   4   1    3.03    0.27
   5   4  -1    3.29    0.24
   5  -4   1    2.96    0.27
   5  -4   1    3.56    0.25
   5   4  -1    3.04    0.23
   5   4  -1    3.20    0.23
   6   4   1    7.00    0.37
  -6  -4   1    7.29    0.41
   6   4   1    7.88    0.42
   6  -4  -1    7.45    0.38
   6  -4  -1    7.24    0.44
   6   4   1    7.46    0.38
  -6   4  -1    7.11    0.41
   6  -4   1    7.59    0.40
   6   4  -1    7.64    0.39
   6   4  -1    7.90    0.39
  -6   4   1    6.87    0.42
  -6  -4  -1    7.45    0.39
   6  -4   1    7.52    0.44
   6   4  -1    8.06    0.41
   7  -4  -1   15.53    0.63
  -7   4  -1   15.16    0.69
   7   4   1   15.36    0.67
  -7  -4   1   15.49    0.69
   7   4   1   16.40    0.65
   7  -4  -1   14.86    0.72
   7   4   1   15.10    0.62
   7   4  -1   15.38    0.62
  -7  -4  -1   16.22    0.66
   7   4  -1   15.14    0.62
  -7   4   1   15.02    0.69
   7  -4   1   13.44    0.68
   7   4  -1   14.50    0.63
   7  -4   1   14.88    0.64
   8   4   1    4.75    0.36
   8  -4  -1    4.67    0.36
  -8   4  -1    4.52    0.40
   8   4   1    5.35    0.39
  -8  -4   1    5.32    0.41
   8  -4  -1    4.45    0.42
   8  -4   1    5.61    0.44
   8  -4   1    4.62    0.37
   8   4  -1    5.28    0.39
   8   4  -1    5.34    0.38
  -8   4   1    4.79    0.42
  -8  -4  -1    4.93    0.39
   9  -4  -1   11.70    0.60
   9  -4  -1   11.93    0.71
   9   4   1   13.93    0.68
  -9   4  -1   11.99    0.68
  -9  -4   1   11.83    0.67
   9   4   1   12.98    0.64
  -9   4   1   11.70    0.69
   9  -4   1   13.02    0.73
   9   4  -1   12.27    0.65
   9  -4   1   12.80    0.65
  -9  -4  -1   13.83    0.69
   9   4  -1   13.12    0.64
 -10   4  -1    2.17    0.38
 -10  -4   1    3.03    0.43
  10  -4  -1    2.70    0.34
  10   4   1    2.92    0.41
  10  -4  -1    2.55    0.40
 -10   4   1    3.26    0.42
  10   4  -1    3.37    0.36
  10  -4   1    3.01    0.44
  10   4  -1    3.25    0.42
  10  -4   1    3.08    0.37
 -11  -4   1   12.07    0.79
  11  -4  -1   10.06    0.74
  11   4   1   10.91    0.70
 -11   4  -1    9.56    0.70
  11  -4  -1   10.60    0.64
  11  -4   1    9.97    0.67
  11   4  -1   10.40    0.67
  11   4  -1    9.58    0.65
   0   4   2  113.35    3.18
   0   4  -2  112.40    3.04
   0   4   2  113.17    3.02
   0   4  -2  114.18    3.03
   0   4  -2  113.43    3.18
   0  -4   2  112.72    3.03
   1   4   2  244.72    6.05
   1   4   2  232.88    6.21
  -1   4  -2  218.65    6.16
   1  -4  -2  218.93    6.04
   1   4   2  222.52    6.35
  -1   4  -2  241.41    6.34
  -1  -4   2  236.74    6.07
  -1   4  -2  237.73    6.15
  -1   4  -2  229.87    6.06
   1   4   2  229.02    6.08
  -1   4   2  240.75    6.34
   1  -4   2  247.05    6.30
   1   4  -2  235.57    6.59
  -1   4   2  244.23    6.56
  -1  -4  -2  234.27    6.27
   1   4  -2  238.97    6.36
   1   4  -2  234.59    6.37
  -1   4   2  243.09    6.43
   2  -4  -2  131.70    3.60
  -2   4  -2  124.01    3.69
   2   4   2  131.32    3.71
  -2   4  -2  138.29    3.62
   2   4   2  138.94    3.82
   2   4   2  142.59    3.61
   2   4   2  140.51    3.62
  -2  -4   2  139.24    3.62
  -2   4  -2  134.58    3.76
  -2   4   2  133.13    3.76
  -2   4   2  137.98    3.71
   2  -4   2  136.46    3.68
   2   4  -2  141.55    3.72
   2   4  -2  140.14    3.69
   2   4  -2  131.53    3.85
   2   4  -2  134.22    3.65
  -2  -4  -2  140.24    3.66
   2  -4   2  135.89    3.73
  -2   4   2  141.44    3.80
  -3  -4   2   31.38    0.95
   3   4   2   31.15    1.02
  -3   4  -2   32.50    0.95
  -3   4  -2   32.92    0.96
  -3   4  -2   32.55    1.02
   3   4   2   32.96    1.01
   3   4   2   29.45    0.95
   3  -4  -2   30.40    0.94
   3   4  -2   31.05    0.99
  -3   4   2   31.73    1.03
   3   4  -2   31.94    0.95
   3   4  -2   31.47    0.95
   3  -4   2   31.62    1.01
   3   4  -2   32.74    1.04
  -3  -4  -2   33.35    0.95
  -3   4   2   30.99    0.99
   3  -4   2   32.66    0.99
  -3  -4  -2   31.05    0.96
  -4   4  -2   72.75    1.93
  -4   4  -2   68.74    2.02
  -4   4  -2   69.55    1.94
   4  -4  -2   64.58    2.04
  -4  -4   2   69.13    2.00
   4  -4  -2   70.15    1.92
   4   4   2   68.38    2.01
   4   4   2   68.03    1.94
   4   4   2   68.31    2.04
   4   4  -2   71.27    2.00
  -4   4   2   75.35    2.00
  -4   4   2   69.60    2.07
   4   4  -2   72.15    2.12
  -4  -4  -2   69.04    2.00
   4   4  -2   72.28    2.02
  -4  -4  -2   71.76    2.00
   4  -4   2   69.65    2.03
   5   4   2   17.54    0.61
   5   4   2   15.27    0.62
   5  -4  -2   16.08    0.68
  -5   4  -2   14.96    0.64
   5   4   2   15.55    0.61
   5  -4  -2   15.59    0.58
  -5  -4   2   16.39    0.64
   5   4  -2   15.50    0.61
   5  -4   2   15.04    0.60
   5   4  -2   15.72    0.58
   5   4  -2   15.63    0.58
  -5  -4  -2   16.06    0.59
   5  -4   2   15.07    0.65
  -5   4   2   16.13    0.64
   6   4   2   16.38    0.68
   6  -4  -2   17.50    0.74
   6   4   2   16.49    0.64
   6   4   2   17.10    0.65
   6  -4  -2   16.70    0.63
  -6   4  -2   16.94    0.71
  -6  -4   2   16.05    0.69
   6  -4   2   18.53    0.75
   6   4  -2   17.11    0.65
  -6   4   2   17.22    0.72
  -6  -4  -2   17.32    0.67
   6  -4   2   17.60    0.68
   6   4  -2   17.43    0.67
   6   4  -2   17.04    0.68
   7   4   2   16.56    0.68
   7  -4  -2   17.34    0.78
   7  -4  -2   16.67    0.66
   7   4   2   16.92    0.67
  -7  -4   2   16.81    0.74
  -7   4  -2   17.36    0.76
   7   4   2   17.45    0.73
   7  -4   2   16.87    0.70
  -7   4   2   16.45    0.74
   7   4  -2   16.53    0.68
  -7  -4  -2   16.28    0.69
   7   4  -2   16.97    0.67
   7  -4   2   17.73    0.77
   8   4   2    2.61    0.29
   8   4   2    3.19    0.33
  -8   4  -2    2.04    0.30
  -8  -4   2    2.67    0.33
   8  -4  -2    2.57    0.27
   8  -4  -2    2.31    0.33
  -8  -4  -2    2.99    0.32
   8   4  -2    1.93    0.26
   8  -4   2    2.82    0.31
   8   4  -2    2.42    0.29
  -8   4   2    2.92    0.34
   8  -4   2    2.89    0.35
   9  -4  -2    3.38    0.33
   9   4   2    3.44    0.37
  -9  -4   2    3.30    0.39
   9  -4  -2    3.35    0.41
  -9   4  -2    2.45    0.35
   9  -4   2    3.21    0.36
   9   4  -2    3.66    0.35
   9   4  -2    4.08    0.38
  -9   4   2    3.32    0.37
   9  -4   2    3.03    0.39
 -10  -4   2    0.66    0.32
  10  -4  -2    1.36    0.34
  10  -4  -2    1.30    0.28
 -10   4  -2    1.57    0.34
  10   4   2    1.01    0.28
  10  -4   2    0.76    0.29
  10   4  -2    1.18    0.28
  10  -4   2    1.30    0.32
  10   4  -2    1.54    0.33
 -10   4   2    0.82    0.28
 -11  -4   2    1.33    0.38
  11   4   2    1.13    0.32
  11  -4  -2    0.84    0.28
  11   4  -2    0.40    0.27
   0   4  -3   49.36    1.41
   0   4   3   52.44    1.37
   0   4  -3   52.01    1.38
   0  -4  -3   47.55    1.38
   0   4  -3   48.32    1.45
   0   4   3   48.01    1.47
   0  -4   3   53.74    1.42
   0   4  -3   49.99    1.50
   0   4   3   48.05    1.48
  -1  -4   3   23.76    0.72
   1   4   3   22.77    0.77
   1   4   3   22.75    0.64
   1  -4  -3   23.06    0.69
  -1   4  -3   24.55    0.72
   1   4   3   22.86    0.69
  -1   4  -3   22.65    0.75
   1   4   3   22.17    0.76
  -1   4  -3   22.48    0.75
   1  -4   3   23.79    0.71
   1   4  -3   22.89    0.75
   1   4  -3   23.70    0.67
   1   4  -3   23.13    0.71
  -1   4   3   24.46    0.70
   1   4  -3   21.97    0.78
  -1  -4  -3   22.14    0.70
   1  -4   3   24.15    0.74
  -1   4   3   22.62    0.77
  -1   4   3   23.23    0.76
   2   4   3   68.74    1.75
  -2   4  -3   66.64    1.88
  -2   4  -3   61.33    1.80
   2   4   3   62.72    1.88
   2  -4  -3   64.47    1.77
   2   4   3   68.39    1.80
  -2   4  -3   62.15    1.87
   2  -4  -3   63.66    1.77
   2   4   3   62.82    1.91
  -2  -4   3   67.89    1.80
  -2   4   3   68.74    1.92
   2   4  -3   68.07    1.83
   2  -4   3   67.42    1.88
   2   4  -3   64.77    1.89
   2   4  -3   66.63    1.84
  -2  -4  -3   64.78    1.84
   2  -4   3   68.26    1.88
  -2   4   3   67.60    1.87
   2   4  -3   65.80    1.97
  -2   4   3   65.49    1.94
   3   4   3  190.37    5.05
   3  -4  -3  187.37    5.02
   3   4   3  193.23    5.20
   3  -4  -3  200.58    5.02
   3   4   3  183.57    5.30
  -3   4  -3  191.26    5.24
  -3   4  -3  194.79    5.05
  -3   4  -3  184.86    5.17
   3   4  -3  174.14    5.05
  -3  -4  -3  191.07    5.07
   3  -4   3  196.18    5.10
  -3   4   3  186.49    5.22
   3  -4   3  197.03    5.19
   3   4  -3  185.90    5.32
  -3  -4  -3  194.32    5.07
  -3   4   3  201.93    5.25
  -3   4   3  196.35    5.15
   3   4  -3  190.19    5.11
   3   4  -3  190.63    5.16
  -4   4  -3   19.29    0.65
  -4  -4   3   20.10    0.72
   4   4   3   17.63    0.69
   4  -4  -3   18.91    0.74
  -4   4  -3   19.97    0.62
  -4   4  -3   19.62    0.72
   4  -4  -3   19.18    0.63
   4   4   3   18.37    0.66
   4   4   3   19.69    0.71
  -4  -4  -3   18.68    0.65
   4  -4   3   18.15    0.68
  -4   4   3   20.19    0.70
   4  -4   3   19.75    0.71
  -4  -4  -3   19.18    0.63
   4   4  -3   18.84    0.71
   4   4  -3   19.27    0.64
  -4   4   3   19.98    0.61
   4   4  -3   19.04    0.64
  -5   4  -3   14.56    0.62
   5  -4  -3   14.63    0.64
   5   4   3   15.13    0.57
  -5  -4   3   15.30    0.62
   5   4   3   14.04    0.60
   5  -4  -3   14.05    0.53
   5   4   3   14.59    0.58
  -5  -4  -3   14.54    0.55
   5   4  -3   14.97    0.56
   5   4  -3   14.74    0.55
   5   4  -3   15.13    0.61
  -5  -4  -3   15.15    0.57
   5  -4   3   15.33    0.60
  -5   4   3   14.79    0.62
   5  -4   3   15.15    0.63
   6  -4  -3    7.65    0.37
  -6  -4   3    7.33    0.43
   6   4   3    6.69    0.41
   6  -4  -3    7.09    0.45
   6   4   3    7.98    0.40
  -6   4  -3    8.02    0.44
   6   4   3    7.88    0.40
   6  -4   3    7.31    0.45
   6  -4   3    8.21    0.43
   6   4  -3    8.16    0.40
   6   4  -3    7.52    0.39
  -6  -4  -3    7.85    0.39
  -6   4   3    8.15    0.45
   6   4  -3    7.58    0.41
  -7  -4   3    7.12    0.46
   7  -4  -3    8.25    0.51
   7   4   3    6.90    0.44
   7   4   3    7.62    0.42
   7   4   3    7.73    0.41
   7  -4  -3    8.37    0.41
  -7   4  -3    7.99    0.48
   7   4  -3    8.24    0.43
   7  -4   3    7.72    0.45
  -7  -4  -3    8.45    0.44
   7   4  -3    7.98    0.42
   7  -4   3    7.56    0.48
  -7   4   3    7.12    0.46
   8  -4  -3    0.35    0.15
  -8   4  -3   -0.12    0.16
   8   4   3    0.47    0.17
   8  -4  -3    0.28    0.19
  -8  -4   3   -0.08    0.20
   8  -4   3    0.34    0.19
   8   4  -3    0.51    0.20
  -8   4   3    0.29    0.20
   8  -4   3    0.38    0.22
   8   4  -3    0.31    0.18
  -9  -4   3    6.32    0.51
  -9   4  -3    5.35    0.47
   9  -4  -3    6.54    0.54
   9   4   3    5.79    0.46
   9  -4  -3    6.35    0.42
  -9   4   3    6.24    0.50
   9  -4   3    6.23    0.50
   9   4  -3    5.74    0.42
   9  -4   3    5.76    0.45
   9   4  -3    6.07    0.47
  10   4   3    0.39    0.24
 -10   4  -3    0.56    0.24
  10  -4  -3    0.36    0.23
 -10  -4   3    0.22    0.28
  10  -4  -3    0.51    0.29
  10  -4   3    1.02    0.29
 -10   4   3    0.43    0.26
  10   4  -3    0.58    0.24
  11   4   3    2.03    0.40
 -11  -4   3    1.79    0.45
  11  -4  -3    1.63    0.31
  11   4  -3    2.34    0.35
   0  -4   4   25.97    0.72
   0  -4  -4   25.66    0.76
   0   4  -4   25.55    0.79
   0   4   4   25.80    0.84
   0   4   4   25.79    0.85
   0   4  -4   24.68    0.82
   0   4  -4   25.70    0.85
   1   4   4   14.32    0.53
  -1   4  -4   12.95    0.51
  -1  -4   4   14.39    0.48
   1  -4  -4   14.21    0.44
  -1   4  -4   12.85    0.50
  -1   4  -4   14.00    0.48
   1   4   4   12.33    0.52
   1  -4  -4   13.00    0.43
   1   4  -4   12.49    0.49
  -1  -4  -4   12.83    0.45
  -1   4   4   13.52    0.49
   1   4  -4   12.53    0.45
   1  -4   4   14.25    0.44
   1   4  -4   13.10    0.52
   1  -4   4   13.71    0.48
  -1   4   4   13.22    0.43
  -1   4   4   13.11    0.52
  -2   4  -4    2.17    0.17
   2   4   4    1.99    0.19
   2  -4  -4    1.98    0.14
  -2   4  -4    2.06    0.17
  -2   4  -4    2.24    0.20
   2   4   4    2.09    0.16
   2   4   4    2.30    0.19
   2  -4  -4    2.01    0.14
  -2   4   4    2.41    0.17
   2  -4   4    2.52    0.19
   2   4  -4    2.41    0.21
  -2  -4  -4    2.54    0.17
  -2   4   4    2.38    0.17
   2  -4   4    2.84    0.18
   2   4  -4    2.10    0.16
   2   4  -4    2.57    0.19
   2   4  -4    2.38    0.12
  -2   4   4    2.24    0.21
   3   4   4   17.57    0.65
   3  -4  -4   17.75    0.55
  -3   4  -4   17.68    0.65
   3   4   4   16.60    0.64
  -3   4  -4   17.64    0.60
  -3   4  -4   15.90    0.59
   3  -4  -4   17.62    0.55
   3   4   4   18.09    0.60
   3   4  -4   17.64    0.59
  -3   4   4   18.87    0.60
  -3   4   4   17.81    0.62
   3   4  -4   17.94    0.55
  -3  -4  -4   17.39    0.54
  -3   4   4   16.44    0.66
   3   4  -4   16.91    0.63
   3  -4   4   19.20    0.65
   3   4  -4   16.64    0.66
   3  -4   4   17.65    0.62
  -3  -4  -4   17.01    0.60
  -4   4  -4    9.12    0.40
   4   4   4    9.23    0.40
   4   4   4    9.67    0.45
   4   4   4    9.66    0.43
   4  -4  -4    9.34    0.36
  -4   4  -4    8.76    0.44
   4   4  -4    9.33    0.37
   4  -4   4    8.81    0.42
  -4   4   4    8.66    0.45
  -4  -4  -4    9.46    0.36
   4   4  -4    9.45    0.39
  -4  -4  -4    9.75    0.40
   4   4  -4    8.77    0.43
  -4   4   4    9.95    0.36
  -4   4   4    9.34    0.43
   4  -4   4    9.71    0.44
   5  -4  -4   30.21    1.08
  -5   4  -4   29.16    1.04
   5   4   4   29.74    1.01
   5   4   4   29.74    0.97
   5   4   4   30.06    1.04
  -5  -4   4   28.65    1.03
   5  -4  -4   30.59    0.92
   5  -4   4   31.07    1.04
   5   4  -4   31.98    0.99
  -5   4   4   30.24    1.05
   5   4  -4   31.90    0.99
  -5  -4  -4   31.37    1.00
  -5  -4  -4   30.50    0.97
   5   4  -4   32.18    1.08
   5  -4   4   31.30    1.07
  -6   4  -4   33.59    1.19
   6  -4  -4   35.26    1.24
   6  -4  -4   33.08    1.06
  -6  -4   4   33.74    1.19
   6   4   4   34.22    1.14
   6   4   4   33.60    1.17
   6   4  -4   34.00    1.11
  -6   4   4   33.61    1.19
   6   4  -4   34.51    1.19
   6   4  -4   36.47    1.13
   6  -4   4   35.72    1.23
   6  -4   4   35.85    1.18
   7   4   4    4.05    0.30
   7   4   4    4.14    0.36
  -7   4  -4    4.16    0.37
   7  -4  -4    4.32    0.40
  -7  -4   4    4.63    0.39
   7  -4  -4    4.10    0.29
   7   4  -4    4.66    0.32
  -7   4   4    4.30    0.38
   7  -4   4    4.67    0.37
   7   4  -4    4.20    0.32
   7  -4   4    4.72    0.39
  -8   4  -4    2.31    0.32
   8  -4  -4    2.52    0.26
  -8  -4   4    2.70    0.34
   8  -4  -4    2.78    0.36
   8   4   4    2.82    0.33
  -8   4   4    1.72    0.31
   8  -4   4    3.28    0.33
   8  -4   4    2.81    0.35
   8   4  -4    2.41    0.27
  -9  -4   4   23.00    1.00
  -9   4  -4   19.97    0.94
   9  -4  -4   21.87    0.84
   9  -4  -4   21.09    1.00
   9   4   4   20.98    0.95
   9   4  -4   21.50    0.87
  -9   4   4   22.41    0.99
   9  -4   4   22.03    1.00
 -10   4  -4    2.97    0.41
 -10  -4   4    2.98    0.43
  10  -4  -4    2.57    0.40
  10   4   4    3.22    0.40
  10  -4  -4    2.79    0.33
  10  -4   4    2.89    0.42
 -10   4   4    3.19    0.41
  10   4  -4    2.99    0.34
 -11  -4   4    0.73    0.35
  11   4  -4    0.95    0.31
   0  -4  -5   12.21    0.41
   0   4   5   12.85    0.37
   0   4  -5   12.99    0.50
   0  -4   5   12.50    0.45
   0   4  -5   11.94    0.44
   0   4  -5   12.28    0.48
   0  -4  -5   11.98    0.42
   0   4   5   12.15    0.48
  -1   4  -5  176.28    4.82
   1  -4  -5  171.75    4.53
  -1   4  -5  175.63    4.70
  -1   4  -5  176.16    4.60
   1   4   5  167.08    4.82
   1   4   5  171.22    4.74
   1   4  -5  179.76    4.73
   1  -4   5  192.11    4.77
   1   4  -5  166.39    4.98
  -1   4   5  171.89    4.89
   1   4  -5  169.77    4.83
   1  -4   5  185.95    4.76
  -1   4   5  186.35    4.74
  -1  -4  -5  178.48    4.71
  -1   4   5  177.57    4.96
   2   4   5   12.82    0.54
   2  -4  -5   12.92    0.43
  -2   4  -5   13.51    0.53
   2   4   5   13.28    0.53
   2  -4  -5   14.23    0.44
  -2   4  -5   14.25    0.52
  -2   4  -5   13.31    0.49
   2   4  -5   12.94    0.54
  -2   4   5   13.14    0.55
   2   4  -5   13.94    0.53
   2  -4   5   14.11    0.48
  -2   4   5   13.35    0.50
   2   4  -5   13.16    0.47
  -2   4   5   14.09    0.48
  -2  -4  -5   13.16    0.48
   2  -4   5   14.49    0.52
  -3   4  -5    5.08    0.31
  -3   4  -5    5.17    0.27
   3   4   5    5.20    0.28
   3  -4  -5    5.27    0.23
   3   4   5    5.77    0.31
  -3   4  -5    5.14    0.27
   3   4   5    5.51    0.33
   3  -4  -5    6.03    0.23
   3   4  -5    5.26    0.22
  -3   4   5    5.02    0.32
  -3   4   5    5.69    0.29
   3   4  -5    5.28    0.32
  -3  -4  -5    5.24    0.20
   3  -4   5    5.29    0.29
   3   4  -5    5.25    0.30
   3  -4   5    5.53    0.29
   3   4  -5    5.45    0.26
  -3   4   5    5.70    0.27
  -3  -4  -5    5.10    0.27
  -4   4  -5   86.93    2.42
   4   4   5   86.77    2.53
   4  -4  -5   85.09    2.35
   4   4   5   87.77    2.55
  -4   4  -5   90.28    2.48
  -4   4  -5   84.09    2.52
  -4   4   5   85.45    2.59
   4  -4   5   89.12    2.54
   4  -4   5   89.42    2.51
   4   4  -5   90.52    2.62
   4   4  -5   85.61    2.55
   4   4  -5   89.29    2.44
   4   4  -5   90.51    2.45
  -4   4   5   91.67    2.53
  -4  -4  -5   87.51    2.47
   5  -4  -5   14.35    0.66
   5  -4  -5   14.64    0.51
   5   4   5   15.22    0.64
   5   4   5   14.60    0.60
  -5   4  -5   13.49    0.62
  -5  -4   5   14.50    0.64
  -5  -4  -5   14.54    0.58
   5  -4   5   15.07    0.62
   5  -4   5   14.88    0.62
   5   4  -5   14.73    0.62
  -5   4   5   15.75    0.63
   5   4  -5   15.32    0.56
   5   4  -5   14.88    0.55
   6  -4  -5   43.66    1.49
   6  -4  -5   42.44    1.28
   6   4   5   44.29    1.40
  -6  -4   5   42.96    1.45
  -6   4  -5   42.16    1.44
   6   4   5   43.00    1.44
   6  -4   5   47.54    1.48
   6  -4   5   46.24    1.51
   6   4  -5   45.71    1.40
  -6   4   5   46.37    1.51
   6   4  -5   44.41    1.50
  -7   4  -5   74.89    2.36
   7   4   5   78.62    2.31
  -7  -4   5   79.43    2.39
   7  -4  -5   78.17    2.42
   7   4   5   74.55    2.34
   7  -4  -5   71.69    2.16
   7  -4   5   80.36    2.40
  -7   4   5   78.83    2.44
   7   4  -5   77.06    2.30
   7  -4   5   84.84    2.49
   8   4   5    2.74    0.33
  -8   4  -5    2.69    0.33
  -8  -4   5    2.96    0.36
   8  -4  -5    2.96    0.26
   8  -4  -5    2.81    0.37
   8  -4   5    3.25    0.37
   8   4  -5    2.45    0.28
  -8   4   5    3.09    0.36
   9  -4  -5    7.65    0.45
  -9  -4   5    7.65    0.57
   9   4   5    7.85    0.54
  -9   4  -5    7.27    0.53
   9  -4  -5    7.15    0.57
   9   4  -5    7.84    0.47
   9  -4   5    7.51    0.55
  -9   4   5    7.65    0.56
  10   4   5    2.55    0.37
 -10  -4   5    1.81    0.41
  10  -4  -5    1.61    0.37
 -10   4  -5    2.96    0.41
  10  -4  -5    2.50    0.32
 -10   4   5    2.01    0.36
  10   4  -5    2.21    0.32
  10  -4   5    2.40    0.41
   0   4   6    0.40    0.10
   0   4  -6    0.37    0.10
   0   4  -6    0.10    0.09
   0  -4  -6    0.32    0.07
   0   4   6    0.25    0.10
   0   4  -6    0.29    0.08
   0   4   6    0.36    0.05
   0  -4  -6    0.35    0.08
  -1   4  -6   32.24    1.03
  -1   4  -6   30.96    0.96
   1   4   6   29.90    1.03
   1  -4  -6   31.66    0.90
  -1   4  -6   31.69    1.03
   1   4   6   32.38    1.04
  -1   4   6   31.84    1.05
   1   4  -6   33.59    0.98
  -1   4   6   29.93    1.07
  -1  -4  -6   32.99    0.97
   1   4  -6   31.55    1.08
   1   4  -6   33.34    1.05
   1  -4   6   33.11    0.93
  -1   4   6   34.47    0.95
   1  -4   6   34.46    1.02
   2  -4  -6   70.15    1.89
   2   4   6   70.46    2.09
   2   4   6   67.64    2.07
  -2   4  -6   71.39    2.06
  -2   4  -6   69.87    2.07
   2  -4  -6   72.51    1.89
  -2   4  -6   69.86    1.98
   2   4  -6   68.36    2.03
  -2   4   6   70.24    2.05
  -2   4   6   68.92    2.07
   2  -4   6   74.22    1.99
   2   4  -6   68.08    2.10
   2   4  -6   68.75    1.93
  -2  -4  -6   68.61    1.94
   2  -4   6   71.93    1.95
  -2   4   6   71.12    1.95
   3  -4  -6    0.84    0.09
  -3   4  -6    0.80    0.14
   3   4   6    1.03    0.16
   3   4   6    0.58    0.15
  -3   4  -6    0.75    0.13
  -3   4  -6    0.73    0.15
   3  -4  -6    0.61    0.09
   3   4  -6    0.48    0.12
  -3   4   6    0.54    0.13
  -3  -4  -6    0.37    0.10
   3  -4   6    0.65    0.13
   3   4  -6    0.73    0.11
  -3   4   6    0.54    0.11
  -3   4   6    0.70    0.12
   3  -4   6    0.57    0.13
   3   4  -6    0.44    0.12
   4   4   6    3.70    0.30
   4  -4  -6    3.89    0.20
  -4   4  -6    3.91    0.25
  -4   4  -6    3.55    0.28
  -4   4  -6    3.62    0.26
   4   4   6    3.40    0.26
   4  -4   6    3.56    0.28
   4   4  -6    3.69    0.22
   4   4  -6    3.85    0.29
   4   4  -6    4.26    0.30
  -4   4   6    3.85    0.31
  -4  -4  -6    3.63    0.24
  -4   4   6    3.56    0.23
  -4   4   6    3.61    0.26
   4  -4   6    3.93    0.27
   5   4   6   47.37    1.48
   5  -4  -6   44.99    1.52
   5   4   6   44.26    1.49
   5  -4  -6   46.97    1.32
  -5   4  -6   45.99    1.50
   5   4  -6   51.90    1.46
  -5  -4  -6   48.23    1.49
   5  -4   6   49.52    1.54
  -5   4   6   47.05    1.54
   5  -4   6   49.67    1.56
   5   4  -6   49.68    1.59
   6   4   6   10.53    0.50
   6  -4  -6   11.71    0.59
   6  -4  -6    9.75    0.42
  -6   4  -6   10.27    0.55
  -6  -4   6   10.96    0.58
   6   4   6    9.85    0.54
  -6   4   6   11.10    0.55
   6  -4   6   11.41    0.56
   6   4  -6   11.31    0.55
   6   4  -6   11.30    0.49
  -7  -4   6   11.04    0.61
   7  -4  -6    9.74    0.44
   7  -4  -6   11.26    0.62
   7   4   6   10.85    0.58
  -7   4  -6    9.18    0.54
   7   4   6   10.49    0.52
   7   4  -6   10.84    0.49
   7  -4   6   10.87    0.58
  -7   4   6   10.17    0.56
  -8   4  -6   11.90    0.64
  -8  -4   6   12.15    0.67
   8  -4  -6   10.21    0.64
   8   4   6   11.22    0.63
   8  -4  -6   10.47    0.49
  -8   4   6   11.77    0.65
   8  -4   6   10.72    0.62
   8   4  -6   10.87    0.52
   9  -4  -6    0.55    0.18
   9  -4  -6    0.41    0.27
  -9  -4   6    0.37    0.26
   9   4   6    0.45    0.25
  -9   4  -6    0.17    0.22
  -9   4   6    0.49    0.27
   9  -4   6    0.47    0.27
   9   4  -6    0.87    0.21
  10  -4  -6    2.46    0.43
 -10   4  -6    2.09    0.37
  10   4   6    2.87    0.42
  10  -4  -6    2.41    0.31
 -10  -4   6    2.49    0.42
 -10   4   6    1.95    0.39
  10   4  -6    3.25    0.36
  10  -4   6    2.39    0.40
   0   4  -7    1.37    0.14
   0  -4  -7    1.34    0.11
   0   4   7    1.33    0.16
   0   4  -7    1.52    0.18
   0   4  -7    1.44    0.18
   0   4   7    1.09    0.16
   1   4   7   15.22    0.63
   1  -4  -7   15.84    0.50
  -1   4  -7   16.47    0.63
   1   4   7   16.60    0.63
  -1   4  -7   16.58    0.63
  -1   4  -7   16.09    0.57
   1   4  -7   15.39    0.54
   1  -4   7   16.18    0.48
   1   4  -7   15.03    0.60
  -1   4   7   15.82    0.61
  -1  -4  -7   16.40    0.53
  -1   4   7   15.33    0.63
  -1   4   7   16.73    0.51
   1   4  -7   15.77    0.64
   2  -4  -7   24.64    0.72
  -2   4  -7   24.77    0.87
   2   4   7   24.65    0.88
   2  -4  -7   26.93    0.73
  -2   4  -7   24.76    0.81
  -2   4  -7   24.39    0.88
   2   4   7   23.83    0.89
   2   4  -7   25.78    0.89
  -2   4   7   25.24    0.92
   2   4  -7   26.30    0.93
   2  -4   7   25.88    0.79
   2   4  -7   25.58    0.80
  -2   4   7   25.10    0.87
  -2  -4  -7   25.27    0.81
  -2   4   7   27.37    0.82
  -3   4  -7   19.25    0.68
   3   4   7   19.14    0.76
  -3   4  -7   19.63    0.75
   3  -4  -7   19.12    0.58
   3  -4  -7   19.80    0.58
  -3   4  -7   20.32    0.72
   3   4   7   19.35    0.74
   3  -4   7   19.93    0.68
   3   4  -7   19.97    0.78
  -3   4   7   20.86    0.70
   3   4  -7   19.27    0.65
  -3   4   7   20.77    0.72
   3   4  -7   20.85    0.76
  -3  -4  -7   19.56    0.68
  -3   4   7   18.94    0.76
  -4   4  -7   22.39    0.79
  -4   4  -7   22.75    0.86
   4  -4  -7   22.59    0.69
  -4   4  -7   24.35    0.81
   4   4   7   23.47    0.85
   4   4   7   21.61    0.86
   4  -4   7   23.91    0.82
   4   4  -7   23.86    0.76
   4   4  -7   23.01    0.88
   4   4  -7   24.19    0.88
  -4   4   7   22.80    0.82
  -4   4   7   22.93    0.79
  -4  -4  -7   23.07    0.80
  -4   4   7   23.85    0.90
   5  -4  -7   13.04    0.46
   5   4   7   13.64    0.63
  -5   4  -7   13.55    0.62
   5  -4  -7   13.02    0.63
   5   4   7   13.31    0.58
  -5   4   7   13.92    0.60
   5   4  -7   13.81    0.62
   5   4  -7   13.80    0.62
   5  -4   7   13.80    0.59
   5   4  -7   12.97    0.51
  -5  -4  -7   13.27    0.56
   6  -4  -7    1.09    0.15
  -6   4  -7    1.00    0.22
   6  -4  -7    1.19    0.24
   6   4   7    1.15    0.22
  -6  -4   7    1.09    0.24
   6   4   7    1.08    0.21
   6   4  -7    0.88    0.16
  -6   4   7    1.07    0.22
   6   4  -7    1.28    0.21
   6  -4   7    0.54    0.21
   7   4   7    5.54    0.37
   7  -4  -7    5.32    0.30
   7  -4  -7    6.02    0.46
  -7  -4   7    5.55    0.47
  -7   4  -7    5.70    0.42
   7   4   7    4.83    0.42
   7   4  -7    5.60    0.35
  -7   4   7    5.84    0.44
   7  -4   7    5.34    0.41
  -8   4  -7    4.33    0.42
   8  -4  -7    4.42    0.44
   8  -4  -7    3.90    0.29
  -8  -4   7    4.70    0.45
   8   4   7    4.35    0.42
   8  -4   7    4.90    0.43
   8   4  -7    4.77    0.35
  -8   4   7    4.94    0.45
  -9  -4   7    1.54    0.35
   9  -4  -7    1.52    0.23
   9  -4  -7    1.67    0.37
  -9   4  -7    1.82    0.34
   9   4   7    1.71    0.34
   9  -4   7    1.55    0.33
  -9   4   7    1.90    0.35
   9   4  -7    2.12    0.28
  10   4   7    1.88    0.36
  10  -4  -7    1.04    0.38
 -10   4  -7    0.43    0.28
  10  -4  -7    1.63    0.27
 -10  -4   7    0.77    0.33
 -10   4   7    1.54    0.36
  10   4  -7    1.79    0.29
  10  -4   7    0.81    0.33
   0   4   8   -0.01    0.09
   0  -4  -8    0.12    0.07
   0   4  -8    0.01    0.10
   0   4   8   -0.01    0.09
   0   4  -8    0.01    0.08
   0   4  -8    0.07    0.10
  -1   4  -8   18.96    0.64
   1   4   8   18.55    0.72
  -1   4  -8   17.87    0.69
   1   4   8   18.32    0.70
   1  -4  -8   16.64    0.55
  -1   4  -8   19.42    0.72
   1   4  -8   18.95    0.71
   1   4  -8   18.57    0.63
  -1  -4  -8   18.86    0.61
  -1   4   8   19.24    0.74
  -1   4   8   19.15    0.71
  -1   4   8   19.18    0.60
   1   4  -8   18.48    0.74
   2   4   8    5.05    0.34
  -2   4  -8    4.91    0.32
   2  -4  -8    5.00    0.21
  -2   4  -8    4.77    0.28
   2  -4  -8    5.17    0.21
   2   4   8    5.06    0.32
  -2   4  -8    4.67    0.30
   2   4  -8    5.27    0.35
  -2   4   8    5.15    0.27
   2  -4   8    5.26    0.24
  -2  -4  -8    5.64    0.28
  -2   4   8    5.15    0.35
  -2   4   8    5.38    0.32
   2   4  -8    5.46    0.26
   2   4  -8    5.56    0.33
  -3   4  -8   23.33    0.88
   3   4   8   22.38    0.89
  -3   4  -8   25.21    0.82
   3  -4  -8   24.14    0.70
   3  -4  -8   23.17    0.69
   3   4   8   24.03    0.88
  -3   4  -8   25.67    0.87
  -3   4   8   24.29    0.91
   3  -4   8   24.24    0.79
   3   4  -8   24.38    0.91
   3   4  -8   24.10    0.77
   3   4  -8   24.71    0.89
  -3   4   8   23.25    0.84
  -3  -4  -8   23.35    0.80
  -3   4   8   25.66    0.83
  -4   4  -8    7.16    0.37
   4   4   8    6.70    0.39
   4  -4  -8    7.11    0.27
   4   4   8    6.52    0.41
  -4   4  -8    6.99    0.37
  -4   4  -8    6.21    0.40
   4   4  -8    6.74    0.40
  -4   4   8    7.34    0.39
  -4   4   8    7.40    0.44
   4   4  -8    7.26    0.43
   4  -4   8    7.59    0.38
  -4   4   8    7.86    0.37
  -4  -4  -8    7.63    0.37
   4   4  -8    7.00    0.33
  -5   4  -8    0.71    0.18
   5   4   8    0.78    0.18
   5  -4  -8    0.61    0.10
   5   4   8    0.74    0.19
   5  -4   8    0.45    0.16
   5   4  -8    0.61    0.13
  -5   4   8    0.90    0.18
  -5  -4  -8    0.52    0.16
   5   4  -8    0.52    0.18
   5   4  -8    0.84    0.19
  -5   4   8    0.29    0.17
   6  -4  -8    5.96    0.44
   6   4   8    5.47    0.37
  -6   4  -8    5.29    0.39
   6  -4  -8    5.21    0.27
   6   4   8    5.94    0.42
   6   4  -8    6.07    0.33
   6   4  -8    5.74    0.39
   6   4  -8    4.73    0.38
  -6   4   8    5.40    0.40
   6  -4   8    5.84    0.40
   7  -4  -8    4.15    0.42
   7  -4  -8    3.95    0.26
   7   4   8    3.76    0.38
  -7   4  -8    4.72    0.42
  -7  -4   8    4.00    0.42
   7   4   8    4.03    0.34
   7  -4   8    4.57    0.39
   7   4  -8    4.61    0.32
  -7   4   8    4.53    0.40
  -8  -4   8    2.59    0.36
   8   4   8    3.45    0.39
   8  -4  -8    3.36    0.41
  -8   4  -8    3.57    0.39
   8  -4  -8    3.06    0.26
  -8   4   8    2.76    0.36
   8  -4   8    2.79    0.37
   8   4  -8    3.37    0.30
   9  -4  -8    0.78    0.29
   9   4   8    0.85    0.26
  -9   4  -8    1.02    0.29
   9  -4  -8    0.67    0.20
  -9  -4   8    0.97    0.31
   9  -4   8    1.36    0.31
  -9   4   8    0.69    0.29
   9   4  -8    0.76    0.22
 -10  -4   8    6.31    0.62
 -10   4  -8    5.93    0.55
  10  -4  -8    5.96    0.60
  10   4  -8    5.75    0.44
 -10   4   8    5.50    0.56
  10  -4   8    6.61    0.60
   0   4   9   96.28    2.84
   0   4   9   97.09    2.87
   0   4  -9   97.54    2.81
   0   4  -9   97.70    2.69
   0   4  -9   99.34    2.90
   0  -4  -9   98.48    2.63
   1   4   9    1.53    0.20
  -1   4  -9    1.55    0.17
   1  -4  -9    1.35    0.11
  -1   4  -9    1.56    0.20
   1   4   9    1.39    0.22
  -1   4  -9    1.36    0.19
   1   4  -9    1.17    0.17
  -1   4   9    1.46    0.19
  -1  -4  -9    1.84    0.15
   1   4  -9    1.45    0.15
  -1   4   9    1.65    0.22
   1   4  -9    1.63    0.21
  -2   4  -9   35.50    1.11
   2   4   9   32.43    1.19
   2  -4  -9   35.86    0.98
   2   4   9   35.52    1.20
  -2   4  -9   34.16    1.17
  -2   4  -9   35.87    1.19
   2   4  -9   33.26    1.22
  -2  -4  -9   35.53    1.07
   2   4  -9   34.62    1.06
   2   4  -9   35.28    1.18
  -2   4   9   36.40    1.18
  -2   4   9   37.87    1.09
  -2   4   9   34.57    1.21
  -3   4  -9   34.55    1.12
  -3   4  -9   36.11    1.21
  -3   4  -9   35.94    1.19
   3   4   9   33.93    1.20
   3  -4  -9   35.35    0.98
   3   4   9   34.73    1.22
  -3  -4  -9   34.89    1.11
   3   4  -9   36.52    1.26
  -3   4   9   38.30    1.15
  -3   4   9   35.58    1.19
   3  -4   9   36.81    1.11
   3   4  -9   35.33    1.08
  -3   4   9   33.84    1.23
   3   4  -9   37.10    1.22
   4   4   9    8.50    0.46
   4   4   9    9.32    0.51
  -4   4  -9    9.65    0.45
  -4   4  -9    8.34    0.48
   4  -4  -9    9.33    0.32
  -4   4  -9    9.74    0.46
  -4   4   9   10.80    0.48
   4   4  -9   10.21    0.54
  -4   4   9    9.84    0.54
   4   4  -9   10.24    0.52
   4   4  -9   10.29    0.42
  -4  -4  -9   10.49    0.46
  -4   4   9   10.41    0.49
   4  -4   9   10.80    0.46
  -5   4  -9   17.51    0.75
   5  -4  -9   16.79    0.54
   5   4   9   15.98    0.75
  -5   4  -9   16.78    0.67
   5   4   9   17.96    0.74
  -5   4   9   16.20    0.76
  -5   4   9   18.36    0.75
   5   4  -9   17.27    0.77
   5   4  -9   19.20    0.79
   5   4  -9   17.83    0.64
   5  -4   9   18.87    0.72
  -5  -4  -9   17.92    0.69
   6   4   9   19.21    0.79
   6  -4  -9   17.55    0.85
   6  -4  -9   18.50    0.61
   6   4   9   19.06    0.84
  -6   4  -9   18.82    0.82
   6   4  -9   20.43    0.73
  -6   4   9   20.41    0.85
   6  -4   9   20.98    0.83
   6   4  -9   20.34    0.88
   6   4  -9   20.39    0.86
   7  -4  -9    1.43    0.18
   7  -4  -9    1.59    0.32
   7   4   9    1.80    0.27
   7   4   9    1.60    0.29
  -7   4  -9    2.11    0.30
   7   4  -9    2.15    0.23
   7  -4   9    1.49    0.28
  -7   4   9    1.24    0.26
   7   4  -9    1.83    0.28
   8   4   9   37.79    1.46
  -8   4  -9   38.57    1.44
   8  -4  -9   39.34    1.50
   8  -4  -9   38.21    1.20
   8  -4   9   42.08    1.50
   8   4  -9   40.65    1.33
  -8   4   9   40.26    1.51
   9   4   9   -0.12    0.25
  -9   4  -9    0.10    0.25
  -9  -4   9    0.10    0.30
   9  -4  -9    0.06    0.17
   9  -4  -9    0.21    0.30
   9  -4   9    0.06    0.28
  -9   4   9   -0.10    0.25
   9   4  -9    0.22    0.19
 -10   4  -9    4.02    0.50
  10  -4  -9    4.11    0.51
  10  -4   9    4.32    0.49
   0   4 -10    3.44    0.28
   0   4  10    3.05    0.29
   0   4 -10    3.28    0.28
   0  -4 -10    3.01    0.19
   0   4 -10    3.01    0.22
   0   4  10    2.77    0.26
  -1   4 -10   10.68    0.52
   1  -4 -10   10.43    0.37
   1   4  10   10.14    0.53
  -1   4 -10   10.96    0.45
   1   4  10   10.62    0.52
  -1   4 -10   10.37    0.52
  -1   4  10   10.90    0.54
   1   4 -10   11.73    0.57
   1   4 -10   10.94    0.52
  -1   4  10   10.86    0.52
  -1  -4 -10   10.38    0.41
   1   4 -10   11.05    0.44
   2  -4 -10   32.62    0.92
  -2   4 -10   30.26    1.11
  -2   4 -10   32.97    1.15
   2   4  10   33.30    1.17
  -2   4 -10   34.30    1.06
   2   4  10   32.40    1.15
  -2   4  10   32.54    1.18
  -2  -4 -10   34.72    1.05
   2   4 -10   34.19    1.16
   2   4 -10   34.04    1.22
  -2   4  10   35.55    1.17
   2   4 -10   32.84    1.03
  -3   4 -10    4.92    0.32
  -3   4 -10    4.92    0.35
   3   4  10    4.61    0.33
   3  -4 -10    4.83    0.20
   3   4  10    4.36    0.37
  -3   4 -10    4.74    0.34
   3   4 -10    4.94    0.27
   3   4 -10    5.16    0.35
  -3  -4 -10    4.72    0.29
   3   4 -10    4.81    0.37
  -3   4  10    4.63    0.36
  -3   4  10    5.46    0.33
  -3   4  10    4.91    0.30
  -4   4 -10    9.26    0.47
   4   4  10    8.62    0.47
   4   4  10    9.58    0.54
   4  -4 -10    8.79    0.31
  -4   4 -10    8.76    0.49
  -4   4 -10    9.03    0.45
  -4   4  10    9.40    0.47
   4   4 -10    9.05    0.51
   4   4 -10    9.35    0.51
  -4   4  10    9.35    0.53
  -4  -4 -10    9.38    0.44
  -4   4  10    8.86    0.45
   4   4 -10    9.34    0.39
   5  -4 -10    3.76    0.20
   5   4  10    3.70    0.37
  -5   4 -10    3.57    0.35
   5   4  10    3.95    0.34
  -5   4 -10    3.77    0.29
  -5  -4 -10    4.37    0.31
   5   4 -10    3.76    0.25
  -5   4  10    3.70    0.36
   5  -4  10    3.51    0.30
   5   4 -10    4.37    0.38
  -5   4  10    4.46    0.37
   5   4 -10    4.23    0.37
   6  -4 -10   12.36    0.45
  -6   4 -10   13.06    0.66
   6   4  10   13.15    0.63
   6   4  10   12.34    0.67
   6  -4 -10   14.33    0.71
   6   4 -10   13.85    0.70
  -6   4  10   13.69    0.69
   6  -4  10   16.21    0.68
   6   4 -10   13.96    0.71
   6   4 -10   13.59    0.55
   7  -4 -10    2.53    0.37
  -7   4 -10    2.14    0.32
   7   4  10    1.52    0.26
   7   4  10    1.68    0.32
   7  -4 -10    2.06    0.19
   7   4 -10    2.30    0.33
   7   4 -10    2.05    0.23
  -7   4  10    2.34    0.33
   7  -4  10    2.04    0.31
   8   4  10    0.64    0.27
   8  -4 -10    0.64    0.16
  -8   4 -10    0.50    0.24
   8  -4 -10    1.03    0.30
   8   4 -10    0.55    0.26
   8   4 -10    0.66    0.19
   8  -4  10    0.59    0.25
  -8   4  10    0.35    0.25
   9  -4 -10    0.47    0.18
  -9   4 -10    0.26    0.28
   9   4  10   -0.23    0.28
   9  -4 -10    0.31    0.30
   9   4 -10    0.32    0.19
  -9   4  10    0.34    0.28
   9   4 -10    0.09    0.27
   9  -4  10    0.76    0.32
   0   4  11    5.56    0.38
   0  -4 -11    5.79    0.27
   0   4 -11    5.77    0.32
   0   4 -11    5.92    0.38
   0   4  11    6.00    0.38
   0   4 -11    5.41    0.39
   1   4  11    6.27    0.42
   1   4  11    6.58    0.40
   1  -4 -11    6.97    0.28
  -1   4 -11    7.39    0.44
  -1   4 -11    7.07    0.36
  -1   4 -11    6.71    0.40
   1   4 -11    6.52    0.43
   1   4 -11    6.81    0.41
  -1   4  11    7.12    0.44
   1   4 -11    7.16    0.34
  -1   4  11    7.15    0.41
  -1  -4 -11    6.42    0.31
  -2   4 -11   17.99    0.68
  -2   4 -11   18.85    0.76
   2   4  11   17.39    0.77
   2  -4 -11   18.48    0.56
   2   4  11   17.87    0.75
  -2   4 -11   17.70    0.76
  -2  -4 -11   20.15    0.68
  -2   4  11   18.36    0.76
   2   4 -11   19.01    0.66
  -2   4  11   18.24    0.79
   2   4 -11   17.61    0.75
   2   4 -11   19.67    0.82
  -3   4 -11    0.51    0.17
   3   4  11    0.39    0.18
  -3   4 -11    0.84    0.20
  -3   4 -11    0.57    0.16
   3  -4 -11    0.65    0.09
   3   4  11    0.87    0.20
  -3  -4 -11    0.46    0.13
  -3   4  11    0.48    0.19
   3   4 -11    0.28    0.16
  -3   4  11    0.90    0.18
   3   4 -11    0.58    0.12
   3   4 -11    0.61    0.18
   4  -4 -11   26.52    0.76
   4   4  11   25.87    1.04
  -4   4 -11   27.94    0.96
   4   4  11   25.38    1.01
  -4   4 -11   27.12    1.02
  -4   4 -11   27.25    1.00
   4   4 -11   26.23    1.02
  -4   4  11   27.32    1.05
   4   4 -11   27.30    0.87
   4   4 -11   26.67    1.06
  -4  -4 -11   25.54    0.92
  -4   4  11   28.49    0.99
  -5   4 -11   -0.37    0.14
   5   4  11   -0.07    0.17
  -5   4 -11   -0.01    0.15
   5  -4 -11    0.00    0.08
   5   4  11   -0.19    0.13
  -5   4  11   -0.02    0.17
   5   4 -11   -0.04    0.09
   5   4 -11   -0.30    0.14
  -5   4  11    0.09    0.17
   5   4 -11    0.10    0.17
  -5  -4 -11   -0.01    0.15
   6  -4 -11    5.29    0.25
   6   4  11    5.24    0.39
   6  -4 -11    5.34    0.48
  -6   4 -11    6.05    0.45
   6   4  11    4.23    0.42
   6   4 -11    5.46    0.45
   6   4 -11    5.36    0.31
  -6   4  11    5.69    0.44
   6   4 -11    5.56    0.43
   7  -4 -11    0.26    0.24
   7   4  11    0.14    0.24
   7  -4 -11    0.07    0.12
  -7   4 -11    0.35    0.23
   7   4  11    0.20    0.19
   7   4 -11    0.14    0.13
  -7   4  11   -0.03    0.24
   7   4 -11    0.21    0.21
   8  -4 -11    2.89    0.24
  -8   4 -11    3.21    0.40
   8   4  11    3.06    0.41
   8  -4 -11    3.34    0.45
   8   4 -11    3.43    0.30
  -8   4  11    3.76    0.45
   8   4 -11    3.02    0.41
  -9   4 -11    0.20    0.27
   9  -4 -11    0.40    0.21
   9  -4 -11    0.26    0.29
  -9   4  11   -0.26    0.29
   0   4  12    0.19    0.15
   0   4 -12    0.33    0.12
   0  -4 -12    0.15    0.10
   0   4 -12    0.27    0.16
   0   4  12    0.11    0.14
   0   4 -12   -0.05    0.13
  -1   4 -12    2.15    0.26
   1   4  12    1.43    0.23
  -1   4 -12    2.30    0.22
  -1   4 -12    1.59    0.24
   1  -4 -12    2.04    0.15
   1   4  12    1.62    0.25
  -1   4  12    2.04    0.27
   1   4 -12    2.35    0.26
   1   4 -12    1.73    0.19
   1   4 -12    2.00    0.27
  -1  -4 -12    1.73    0.17
  -1   4  12    1.95    0.24
  -2   4 -12    8.28    0.49
   2   4  12    8.02    0.49
   2   4  12    8.06    0.48
  -2   4 -12    7.77    0.47
   2  -4 -12    7.95    0.30
  -2   4 -12    8.63    0.43
  -2   4  12    8.45    0.46
  -2   4  12    7.98    0.48
   2   4 -12    8.12    0.50
   2   4 -12    7.70    0.36
  -2  -4 -12    7.45    0.37
   2   4 -12    7.26    0.45
   3  -4 -12    0.35    0.08
  -3   4 -12    0.12    0.16
  -3   4 -12    0.15    0.15
   3   4  12    0.16    0.14
  -3   4 -12    0.13    0.14
   3   4  12    0.15    0.18
   3   4 -12   -0.08    0.16
   3   4 -12    0.24    0.15
  -3   4  12    0.28    0.15
  -3   4  12    0.36    0.18
   3   4 -12    0.21    0.10
  -3  -4 -12    0.30    0.12
  -4   4 -12    2.36    0.25
   4  -4 -12    1.88    0.13
   4   4  12    2.24    0.32
  -4   4 -12    2.36    0.29
  -4   4 -12    2.43    0.30
   4   4  12    2.32    0.29
   4   4 -12    1.61    0.26
  -4   4  12    2.12    0.27
  -4  -4 -12    2.20    0.24
  -4   4  12    1.78    0.28
   4   4 -12    2.26    0.31
   4   4 -12    2.41    0.20
  -5   4 -12    0.28    0.18
  -5   4 -12    0.45    0.21
   5   4  12    0.38    0.18
   5   4  12    0.39    0.22
   5  -4 -12    0.62    0.10
  -5   4  12    0.28    0.21
   5   4 -12    0.33    0.21
   5   4 -12    0.55    0.14
  -5  -4 -12    0.66    0.19
   5   4 -12    0.52    0.19
   6  -4 -12    4.84    0.24
   6  -4 -12    4.60    0.44
  -6   4 -12    5.22    0.46
   6   4  12    4.88    0.47
   6   4  12    4.74    0.39
   6   4 -12    5.35    0.32
   6   4 -12    5.43    0.46
   6   4 -12    6.02    0.49
   7  -4 -12    1.35    0.32
  -7   4 -12    1.26    0.28
   7   4  12    0.78    0.24
   7  -4 -12    1.02    0.15
   7   4  12    0.71    0.27
  -7   4  12    1.88    0.33
   7   4 -12    1.16    0.18
   7   4 -12    0.99    0.27
  -8   4 -12    3.53    0.44
   8   4  12    2.91    0.45
   8  -4 -12    3.95    0.47
   8  -4 -12    3.28    0.25
  -8   4  12    3.68    0.46
   8   4 -12    3.24    0.43
   8   4 -12    3.20    0.30
   0   4 -13    1.90    0.28
   0   4  13    1.48    0.25
   0  -4 -13    1.65    0.16
   0   4 -13    1.50    0.19
   0   4  13    1.66    0.26
   0   4 -13    1.92    0.26
   1   4  13    4.19    0.37
  -1   4 -13    4.68    0.41
   1  -4 -13    4.19    0.23
  -1   4 -13    4.25    0.30
   1   4  13    4.29    0.40
  -1   4 -13    4.83    0.37
   1   4 -13    4.14    0.27
  -1   4  13    4.21    0.34
   1   4 -13    4.08    0.35
   1   4 -13    3.90    0.38
  -1  -4 -13    4.21    0.25
  -1   4  13    4.30    0.39
   2   4  13   10.22    0.55
   2   4  13    9.62    0.56
  -2   4 -13    9.53    0.56
   2  -4 -13    9.89    0.36
  -2   4 -13   11.35    0.50
  -2   4 -13    9.85    0.55
   2   4 -13    9.97    0.59
   2   4 -13   10.12    0.44
  -2   4  13   10.90    0.56
  -2   4  13   10.36    0.58
   2   4 -13   10.35    0.55
  -2  -4 -13   10.43    0.46
  -3   4 -13    3.83    0.36
   3   4  13    3.62    0.37
  -3   4 -13    3.53    0.30
   3   4  13    3.75    0.35
  -3   4 -13    3.69    0.35
   3  -4 -13    3.27    0.17
   3   4 -13    3.51    0.34
  -3   4  13    3.57    0.34
  -3  -4 -13    3.11    0.27
   3   4 -13    2.79    0.34
  -3   4  13    3.49    0.35
   3   4 -13    3.62    0.25
   4   4  13   16.17    0.79
   4  -4 -13   15.96    0.50
  -4   4 -13   16.69    0.76
   4   4  13   14.78    0.74
  -4   4 -13   16.45    0.77
  -4   4 -13   18.80    0.73
   4   4 -13   16.76    0.62
   4   4 -13   18.01    0.80
  -4   4  13   17.38    0.76
  -4  -4 -13   16.14    0.68
   4   4 -13   15.53    0.80
  -4   4  13   19.01    0.84
   5   4  13    0.70    0.22
  -5   4 -13    0.80    0.24
   5  -4 -13    0.95    0.10
  -5   4 -13    0.73    0.23
   5   4  13    0.68    0.26
   5   4 -13    0.61    0.24
  -5  -4 -13    0.89    0.22
   5   4 -13    0.64    0.15
   5   4 -13    0.73    0.25
  -5   4  13    0.51    0.24
   6  -4 -13    0.95    0.28
   6   4  13    1.01    0.25
   6  -4 -13    0.85    0.12
  -6   4 -13    0.83    0.26
   6   4  13    0.84    0.27
   6   4 -13    0.98    0.26
   6   4 -13    0.82    0.27
   6   4 -13    0.82    0.18
   7   4  13    0.18    0.29
  -7   4 -13    0.68    0.26
   7  -4 -13    0.50    0.13
   7   4  13    0.51    0.24
   7  -4 -13    0.11    0.23
   7   4 -13    0.00    0.24
   7   4 -13    0.24    0.15
  -8   4 -13    2.81    0.43
   8  -4 -13    3.26    0.48
   8   4  13    3.06    0.48
   8  -4 -13    3.64    0.26
   0  -4 -14   -0.08    0.09
   0   4 -14   -0.02    0.16
   0   4  14   -0.03    0.19
   0   4 -14   -0.07    0.15
   0   4 -14    0.05    0.12
   0   4  14   -0.16    0.14
   1  -4 -14    2.04    0.17
  -1   4 -14    1.62    0.29
  -1   4 -14    2.16    0.29
   1   4  14    1.75    0.27
   1   4  14    1.98    0.32
  -1   4 -14    2.10    0.24
  -1   4  14    1.69    0.28
  -1   4  14    1.80    0.27
   1   4 -14    2.37    0.22
   1   4 -14    1.58    0.27
  -1  -4 -14    2.38    0.21
   1   4 -14    2.06    0.28
  -2   4 -14   19.21    0.87
   2  -4 -14   18.76    0.61
  -2   4 -14   19.93    0.85
  -2   4 -14   19.28    0.75
   2   4  14   18.90    0.86
   2   4  14   20.55    0.89
   2   4 -14   17.94    0.89
  -2  -4 -14   19.32    0.72
   2   4 -14   19.46    0.71
  -2   4  14   20.93    0.87
  -2   4  14   21.99    0.91
   2   4 -14   19.66    0.85
   3  -4 -14    0.68    0.10
  -3   4 -14    0.35    0.19
  -3   4 -14    0.42    0.19
   3   4  14    0.76    0.22
   3   4  14    0.42    0.22
  -3   4 -14    0.60    0.21
   3   4 -14    0.78    0.26
  -3  -4 -14    0.84    0.18
   3   4 -14    1.02    0.24
  -3   4  14    0.96    0.24
  -3   4  14    0.49    0.22
   3   4 -14    0.82    0.15
   4   4  14    4.27    0.41
  -4   4 -14    4.38    0.42
  -4   4 -14    4.48    0.41
  -4   4 -14    4.50    0.36
   4  -4 -14    4.58    0.20
   4   4  14    4.91    0.45
  -4  -4 -14    4.56    0.34
   4   4 -14    4.00    0.44
  -4   4  14    4.95    0.45
   4   4 -14    5.17    0.44
   4   4 -14    4.40    0.28
  -4   4  14    4.97    0.41
   5   4  14    0.44    0.24
   5   4  14   -0.01    0.20
  -5   4 -14    0.17    0.22
   5   4 -14    0.28    0.24
   5   4 -14    0.25    0.22
   5   4 -14    0.22    0.13
  -5   4  14    0.35    0.25
  -5  -4 -14    0.34    0.20
  -6   4 -14    3.97    0.43
   6   4  14    3.57    0.44
   6   4  14    2.96    0.39
   6  -4 -14    3.88    0.45
   6   4 -14    3.43    0.41
   6   4 -14    3.71    0.44
   6   4 -14    3.64    0.28
   7  -4 -14    0.94    0.30
   7   4  14    0.40    0.30
  -7   4 -14    0.83    0.35
   7   4 -14    1.07    0.20
   7   4 -14    0.72    0.30
   0   4 -15    5.10    0.43
   0   4 -15    5.37    0.34
   0   4  15    5.00    0.44
   0   4 -15    5.61    0.48
   0  -4 -15    5.28    0.30
   0   4  15    4.85    0.41
   1   4  15   13.22    0.70
  -1   4 -15   13.82    0.60
  -1   4 -15   15.34    0.72
   1   4  15   14.97    0.73
  -1   4 -15   12.69    0.72
   1  -4 -15   14.11    0.51
  -1   4  15   14.77    0.73
   1   4 -15   14.25    0.70
  -1  -4 -15   13.61    0.55
   1   4 -15   12.95    0.73
  -1   4  15   14.00    0.71
   1   4 -15   13.97    0.58
  -2   4 -15    0.85    0.25
  -2   4 -15    1.09    0.20
   2   4  15    0.57    0.26
  -2   4 -15    0.99    0.25
   2  -4 -15    1.31    0.14
   2   4  15    1.10    0.24
   2   4 -15    1.15    0.18
  -2   4  15    2.01    0.32
   2   4 -15    0.97    0.24
  -2   4  15    1.13    0.25
   2   4 -15    1.28    0.27
  -2  -4 -15    1.60    0.20
   3   4  15    1.25    0.26
  -3   4 -15    0.65    0.26
  -3   4 -15    1.03    0.26
   3  -4 -15    0.99    0.12
   3   4  15    1.09    0.27
  -3   4 -15    1.08    0.22
  -3   4  15    1.17    0.27
  -3  -4 -15    0.68    0.19
  -3   4  15    0.73    0.21
   3   4 -15    0.75    0.26
   3   4 -15    0.71    0.25
   3   4 -15    0.89    0.17
   4   4  15    4.04    0.43
  -4   4 -15    4.08    0.41
  -4   4 -15    4.14    0.41
   4  -4 -15    3.68    0.19
   4   4  15    3.90    0.41
  -4   4 -15    4.30    0.37
  -4  -4 -15    3.70    0.33
   4   4 -15    3.73    0.40
   4   4 -15    4.27    0.45
  -4   4  15    3.89    0.41
   4   4 -15    3.73    0.27
  -4   4  15    3.93    0.39
   5   4  15    1.94    0.32
  -5   4 -15    2.28    0.34
   5   4  15    1.71    0.34
  -5  -4 -15    1.78    0.27
   5   4 -15    2.03    0.22
   5   4 -15    2.26    0.37
  -5   4  15    1.45    0.33
   5   4 -15    2.28    0.35
   6   4  15    3.52    0.47
   6   4  15    3.32    0.41
   6   4 -15    4.58    0.48
   6   4 -15    3.83    0.29
   6   4 -15    4.38    0.49
   0  -4 -16   -0.09    0.12
   0   4  16   -0.22    0.18
   0   4 -16   -0.16    0.17
   0   4 -16   -0.11    0.14
   0   4  16   -0.15    0.24
   0   4 -16    0.08    0.21
   1   4  16    3.00    0.38
  -1   4 -16    2.51    0.27
  -1   4 -16    2.86    0.35
   1  -4 -16    2.71    0.21
   1   4  16    2.41    0.34
  -1   4 -16    2.63    0.37
  -1  -4 -16    2.25    0.23
  -1   4  16    2.62    0.34
  -1   4  16    2.27    0.31
   1   4 -16    2.50    0.25
   1   4 -16    2.38    0.35
   1   4 -16    2.84    0.34
  -2   4 -16    2.80    0.28
   2   4  16    1.77    0.30
   2  -4 -16    2.39    0.19
  -2   4 -16    2.31    0.34
   2   4  16    2.60    0.39
  -2   4 -16    2.00    0.32
  -2  -4 -16    2.36    0.25
  -2   4  16    2.17    0.32
   2   4 -16    1.90    0.34
   2   4 -16    1.92    0.21
  -2   4  16    2.14    0.35
   2   4 -16    1.79    0.31
  -3   4 -16   12.68    0.73
  -3   4 -16   12.37    0.70
   3   4  16   12.78    0.72
   3   4  16   13.64    0.75
  -3   4 -16   14.50    0.66
   3  -4 -16   13.00    0.45
  -3   4  16   14.67    0.73
   3   4 -16   12.67    0.69
  -3  -4 -16   12.95    0.60
   3   4 -16   14.08    0.79
   3   4 -16   12.91    0.55
  -3   4  16   14.26    0.73
   4   4  16    0.83    0.29
  -4   4 -16    0.75    0.28
  -4   4 -16    1.13    0.25
  -4   4 -16    0.66    0.29
   4  -4 -16    1.23    0.13
   4   4  16    0.79    0.27
   4   4 -16    1.03    0.26
  -4   4  16    1.38    0.34
   4   4 -16    1.40    0.33
   4   4 -16    0.68    0.16
  -4  -4 -16    1.36    0.27
  -4   4  16    0.41    0.25
   5   4  16   -0.17    0.26
   5   4  16   -0.11    0.23
   5   4 -16   -0.21    0.25
   5   4 -16    0.12    0.15
   5   4 -16   -0.05    0.23
  -5  -4 -16    0.00    0.22
   6   4  16    2.08    0.37
   6   4  16    2.50    0.42
   6   4 -16    2.67    0.43
   6   4 -16    1.82    0.38
   0  -4 -17    5.49    0.33
   0   4 -17    4.49    0.48
   0   4  17    5.54    0.49
   0   4  17    6.19    0.54
   0   4 -17    5.83    0.49
   0   4 -17    5.12    0.37
  -1   4 -17    4.31    0.35
  -1   4 -17    3.70    0.42
   1  -4 -17    3.71    0.25
  -1   4 -17    2.97    0.43
   1   4  17    4.00    0.43
   1   4  17    3.37    0.39
   1   4 -17    3.97    0.46
  -1   4  17    3.86    0.42
   1   4 -17    4.13    0.33
   1   4 -17    4.02    0.43
  -1  -4 -17    4.17    0.30
  -1   4  17    3.57    0.42
   2   4  17    7.31    0.56
  -2   4 -17    9.36    0.52
   2  -4 -17    8.60    0.37
  -2   4 -17    9.16    0.60
   2   4  17    9.27    0.61
  -2   4 -17    8.47    0.61
  -2   4  17    8.75    0.58
   2   4 -17    8.13    0.43
   2   4 -17    8.74    0.58
  -2  -4 -17    8.03    0.44
  -2   4  17    8.93    0.60
   2   4 -17    7.49    0.59
  -3   4 -17    1.73    0.30
   3  -4 -17    1.75    0.16
  -3   4 -17    2.15    0.37
   3   4  17    1.67    0.35
   3   4  17    1.65    0.32
   3   4 -17    1.67    0.22
  -3   4  17    1.21    0.30
  -3  -4 -17    1.83    0.25
   3   4 -17    2.01    0.33
   3   4 -17    1.25    0.33
   4  -4 -17    3.01    0.20
   4   4  17    3.39    0.45
  -4   4 -17    3.26    0.36
  -4   4 -17    2.84    0.41
   4   4  17    2.83    0.40
   4   4 -17    3.59    0.43
   4   4 -17    3.47    0.28
  -4   4  17    2.81    0.38
  -4  -4 -17    3.07    0.32
   4   4 -17    3.53    0.47
   5   4  17    3.04    0.43
   5   4  17    2.62    0.40
   5   4 -17    3.29    0.44
   5   4 -17    3.22    0.46
  -5  -4 -17    3.82    0.37
   0   4 -18    0.78    0.29
   0  -4 -18    0.42    0.17
   0   4 -18    0.36    0.26
   0   4  18    0.06    0.22
   0   4 -18    0.36    0.20
   1   4  18    2.11    0.37
  -1   4 -18    2.85    0.40
   1  -4 -18    2.79    0.24
  -1   4 -18    2.95    0.31
   1   4  18    2.30    0.40
  -1   4 -18    3.28    0.44
  -1  -4 -18    2.66    0.27
   1   4 -18    3.00    0.29
   1   4 -18    2.76    0.42
  -1   4  18    2.79    0.39
   1   4 -18    2.42    0.36
  -2   4 -18    4.87    0.51
   2   4  18    4.63    0.51
  -2   4 -18    5.25    0.42
   2  -4 -18    4.78    0.29
   2   4  18    4.67    0.49
  -2   4  18    5.15    0.49
  -2  -4 -18    4.49    0.35
   2   4 -18    4.99    0.49
   2   4 -18    4.64    0.52
   2   4 -18    5.15    0.36
   3   4  18    0.64    0.26
   3  -4 -18    0.70    0.15
   3   4  18    0.09    0.33
  -3   4 -18    0.54    0.30
  -3   4 -18    1.04    0.28
   3   4 -18    1.06    0.21
   3   4 -18    1.07    0.30
  -3  -4 -18    0.76    0.23
   3   4 -18    0.67    0.31
  -3   4  18    0.63    0.28
  -4   4 -18    5.37    0.55
  -4   4 -18    4.55    0.45
   4  -4 -18    5.83    0.26
   4   4  18    5.12    0.57
  -4   4  18    5.27    0.52
   4   4 -18    5.77    0.53
   1   4 -19    0.34    0.32
   2   4 -19    0.80    0.33
   0   5   0    0.07    0.06
   0   5   0   -0.01    0.07
   0  -5   0   -0.03    0.06
   0   5   0    0.06    0.08
   0   5   0    0.05    0.06
  -1   5   0   57.81    1.64
   1   5   0   57.34    1.63
   1   5   0   56.35    1.70
   1  -5   0   55.80    1.60
   1   5   0   57.41    1.60
  -1   5   0   54.68    1.67
  -1   5   0   57.87    1.62
  -1  -5   0   55.23    1.60
  -2  -5   0    8.61    0.36
  -2   5   0    9.06    0.35
  -2   5   0    9.29    0.37
  -2   5   0    9.34    0.40
   2   5   0    9.35    0.36
   2   5   0    9.04    0.42
   2  -5   0    8.68    0.37
   2   5   0    9.50    0.38
   2   5   0    9.16    0.37
   3  -5   0   72.37    1.99
  -3   5   0   71.87    2.01
  -3   5   0   65.70    2.03
  -3  -5   0   69.98    1.97
   3   5   0   72.53    1.98
   3   5   0   68.89    2.01
   3   5   0   72.00    1.98
   3   5   0   69.39    2.10
   3  -5   0   70.23    2.06
   4  -5   0    4.55    0.31
   4   5   0    4.42    0.27
   4  -5   0    4.98    0.28
  -4  -5   0    4.56    0.27
  -4   5   0    5.36    0.23
  -4   5   0    4.86    0.30
   4   5   0    4.36    0.29
   4   5   0    4.62    0.28
   4   5   0    4.39    0.26
  -5   5   0   16.03    0.68
   5   5   0   16.82    0.67
   5  -5   0   16.40    0.69
   5   5   0   15.49    0.63
  -5  -5   0   17.69    0.65
   5   5   0   17.53    0.63
   5  -5   0   16.28    0.63
   6   5   0   35.33    1.16
   6  -5   0   35.36    1.27
   6   5   0   36.47    1.19
   6  -5   0   36.55    1.18
   6   5   0   36.18    1.21
  -6   5   0   34.44    1.24
  -6  -5   0   37.21    1.20
   7   5   0    1.90    0.24
   7   5   0    1.91    0.24
  -7   5   0    1.51    0.23
   7   5   0    2.18    0.25
   7  -5   0    2.12    0.25
   7  -5   0    1.82    0.27
  -7  -5   0    1.94    0.25
   8  -5   0    3.16    0.32
   8   5   0    2.77    0.30
  -8   5   0    2.95    0.35
  -8  -5   0    2.93    0.34
   8  -5   0    2.82    0.35
   8   5   0    3.23    0.32
  -9   5   0    6.05    0.50
   9   5   0    7.34    0.49
  -9  -5   0    7.10    0.52
   9   5   0    6.65    0.47
   9  -5   0    6.11    0.47
   9  -5   0    6.37    0.52
  10  -5   0    6.61    0.52
 -10   5   0    6.87    0.54
  10   5   0    6.52    0.53
  10  -5   0    5.89    0.56
  11   5   0    3.31    0.45
  11  -5   0    3.50    0.44
   0   5  -1    1.62    0.16
   0   5  -1    1.48    0.13
   0   5   1    1.32    0.13
   0   5   1    1.42    0.13
   0   5  -1    1.62    0.15
   0  -5   1    1.71    0.15
   0  -5  -1    1.63    0.14
   0   5   1    1.32    0.15
   0   5  -1    1.66    0.13
   0   5   1    1.62    0.15
  -1  -5   1    0.82    0.11
   1   5   1    0.80    0.11
  -1   5  -1    0.74    0.10
  -1   5  -1    1.01    0.12
  -1   5  -1    0.94    0.13
   1   5   1    0.81    0.10
   1   5   1    0.93    0.14
   1   5   1    0.75    0.12
   1  -5  -1    0.95    0.11
  -1   5  -1    1.12    0.13
  -1   5   1    0.81    0.10
  -1   5   1    1.00    0.13
   1   5  -1    0.74    0.11
  -1   5   1    0.81    0.11
   1   5  -1    0.84    0.11
   1   5  -1    0.93    0.13
   1   5  -1    0.78    0.11
  -1   5   1    0.83    0.12
   1  -5   1    0.93    0.12
  -1  -5  -1    0.71    0.10
  -2   5  -1    1.44    0.14
   2  -5  -1    1.11    0.13
  -2  -5   1    1.12    0.13
  -2   5  -1    1.08    0.12
  -2   5  -1    1.15    0.14
   2   5   1    1.18    0.15
   2   5   1    1.25    0.13
   2   5   1    1.31    0.11
   2   5   1    1.19    0.16
  -2   5  -1    0.81    0.13
  -2  -5  -1    1.21    0.13
  -2   5   1    1.01    0.13
   2   5  -1    1.10    0.13
   2   5  -1    1.35    0.17
  -2   5   1    1.08    0.15
   2   5  -1    1.09    0.13
   2   5  -1    1.17    0.13
   2  -5   1    1.14    0.14
  -2   5   1    1.36    0.14
  -3  -5   1   24.76    0.77
  -3   5  -1   24.32    0.76
   3   5   1   22.58    0.84
   3   5   1   24.27    0.77
  -3   5  -1   24.17    0.76
   3  -5  -1   22.80    0.76
   3   5   1   22.96    0.80
   3   5   1   24.72    0.75
  -3   5  -1   23.31    0.82
   3   5  -1   23.32    0.76
   3   5  -1   22.58    0.83
  -3   5   1   24.07    0.75
   3   5  -1   23.65    0.77
   3  -5   1   23.97    0.81
   3   5  -1   22.70    0.76
   3  -5   1   24.04    0.78
  -3   5   1   23.93    0.80
  -3  -5  -1   23.33    0.76
  -3   5   1   23.31    0.82
   4   5   1   19.84    0.71
  -4   5  -1   18.13    0.72
   4   5   1   18.94    0.67
  -4   5  -1   20.47    0.63
   4  -5  -1   18.98    0.67
   4  -5  -1   19.72    0.76
   4   5   1   20.19    0.74
  -4   5   1   22.19    0.66
   4   5  -1   20.77    0.71
   4  -5   1   19.66    0.76
  -4  -5  -1   21.38    0.71
   4   5  -1   19.24    0.76
   4  -5   1   20.06    0.72
  -4   5   1   19.53    0.74
   4   5  -1   20.56    0.70
   4   5  -1   20.54    0.71
  -5   5  -1   45.79    1.48
   5  -5  -1   47.79    1.53
   5   5   1   46.89    1.49
   5  -5  -1   45.72    1.41
  -5  -5   1   45.77    1.45
   5   5   1   47.74    1.46
   5   5   1   45.95    1.41
  -5  -5  -1   46.82    1.43
   5   5  -1   47.49    1.42
   5   5  -1   48.31    1.52
   5  -5   1   48.61    1.46
   5   5  -1   48.16    1.45
   5  -5   1   46.36    1.52
  -5   5   1   44.73    1.49
   6  -5  -1   14.42    0.69
   6   5   1   14.97    0.63
  -6   5  -1   15.85    0.69
  -6  -5   1   15.63    0.65
   6   5   1   14.68    0.63
   6   5   1   14.87    0.61
   6  -5  -1   14.78    0.61
   6  -5   1   15.61    0.64
  -6   5   1   15.05    0.67
   6   5  -1   14.91    0.65
  -6  -5  -1   15.27    0.63
   6  -5   1   16.71    0.72
   6   5  -1   16.18    0.64
   6   5  -1   15.81    0.63
   7   5   1    7.52    0.44
   7   5   1    7.84    0.43
   7  -5  -1    7.90    0.50
  -7   5  -1    7.04    0.46
   7   5   1    8.10    0.44
   7  -5  -1    7.18    0.42
  -7  -5   1    7.69    0.47
   7  -5   1    7.68    0.50
   7   5  -1    8.21    0.45
  -7   5   1    8.00    0.49
  -7  -5  -1    8.28    0.45
   7  -5   1    8.11    0.45
   7   5  -1    8.52    0.45
   7   5  -1    8.38    0.44
  -8   5  -1    1.68    0.28
   8  -5  -1    1.97    0.27
   8  -5  -1    1.15    0.27
   8   5   1    1.19    0.23
  -8  -5   1    1.70    0.28
   8   5   1    0.85    0.23
   8   5  -1    1.44    0.25
  -8  -5  -1    1.67    0.28
   8  -5   1    1.90    0.31
   8   5  -1    2.08    0.27
   8  -5   1    1.45    0.25
  -8   5   1    1.02    0.25
  -9  -5   1    1.60    0.32
   9  -5  -1    1.50    0.32
   9   5   1    1.44    0.27
   9  -5  -1    1.90    0.27
  -9   5  -1    1.37    0.31
   9  -5   1    1.35    0.32
   9   5  -1    1.78    0.27
   9  -5   1    1.26    0.27
  -9   5   1    1.13    0.29
   9   5  -1    1.56    0.32
  10   5   1    1.54    0.32
 -10  -5   1    1.39    0.33
  10  -5  -1    0.87    0.27
 -10   5  -1    1.40    0.32
  10  -5  -1    0.81    0.31
  10   5  -1    1.27    0.30
  10   5  -1    1.43    0.30
  10  -5   1    0.82    0.28
 -10   5   1    1.20    0.32
  10  -5   1    0.95    0.32
  11   5   1    1.88    0.37
  11  -5  -1    1.53    0.35
  11  -5   1    0.93    0.34
   0   5   2    1.11    0.11
   0  -5  -2    1.02    0.11
   0   5  -2    1.13    0.11
   0   5   2    1.02    0.11
   0   5   2    1.16    0.15
   0   5   2    0.90    0.13
   0  -5   2    1.00    0.13
   0   5  -2    1.26    0.14
   0   5  -2    1.06    0.13
   0   5  -2    1.22    0.13
   1   5   2   32.55    0.93
  -1   5  -2   33.73    0.98
  -1   5  -2   31.12    1.01
   1   5   2   33.17    1.06
  -1   5  -2   32.27    0.97
   1  -5  -2   30.67    0.96
   1   5   2   32.66    1.03
  -1  -5   2   32.54    0.98
  -1   5  -2   33.24    1.04
  -1   5   2   30.76    0.94
   1   5  -2   31.67    1.03
  -1   5   2   30.99    0.99
  -1   5   2   30.06    1.00
   1   5  -2   32.36    0.97
   1   5  -2   31.59    0.92
   1   5  -2   32.14    0.95
  -1  -5  -2   31.16    0.94
   1  -5   2   31.51    0.96
  -2   5  -2  176.42    4.93
   2   5   2  182.34    4.73
   2  -5  -2  172.61    4.72
   2   5   2  180.54    4.86
  -2   5  -2  180.58    4.73
  -2  -5   2  185.50    4.73
   2   5   2  170.46    4.97
  -2   5  -2  170.31    4.83
   2   5   2  184.26    4.73
   2   5  -2  181.49    4.87
   2  -5   2  181.68    4.84
  -2   5   2  181.58    4.88
  -2   5   2  183.51    4.95
   2   5  -2  185.23    4.82
   2   5  -2  178.91    4.88
  -2  -5  -2  169.39    4.80
  -2   5   2  187.75    5.02
   2   5  -2  181.59    5.08
   2  -5   2  183.08    4.91
   3   5   2   19.36    0.71
   3   5   2   20.71    0.68
   3   5   2   19.90    0.74
  -3   5  -2   19.63    0.66
  -3  -5   2   19.61    0.67
   3   5   2   20.99    0.63
   3  -5  -2   19.32    0.66
  -3   5  -2   18.79    0.72
  -3   5  -2   20.86    0.67
  -3   5   2   21.41    0.68
   3  -5   2   19.88    0.70
  -3   5   2   19.94    0.75
  -3   5   2   19.96    0.71
   3  -5   2   20.40    0.72
  -3  -5  -2   20.41    0.68
   3   5  -2   21.17    0.69
   3   5  -2   19.73    0.75
   3   5  -2   20.29    0.70
   3   5  -2   20.09    0.66
  -4   5  -2    0.63    0.10
   4   5   2    0.42    0.12
   4  -5  -2    0.71    0.16
   4   5   2    0.50    0.12
  -4   5  -2    0.55    0.14
   4   5   2    0.30    0.12
   4  -5  -2    0.73    0.12
   4   5  -2    0.43    0.11
   4   5  -2    0.55    0.12
  -4   5   2    0.74    0.15
   4   5  -2    0.80    0.14
   4  -5   2    0.56    0.14
  -4   5   2    0.48    0.10
   4  -5   2    0.50    0.13
   4   5  -2    0.25    0.13
  -4  -5  -2    0.54    0.13
   5  -5  -2   12.98    0.54
   5   5   2   14.92    0.57
  -5  -5   2   14.30    0.61
   5   5   2   14.63    0.60
   5  -5  -2   14.20    0.64
  -5   5  -2   14.08    0.62
   5   5   2   14.21    0.60
   5  -5   2   13.66    0.61
   5  -5   2   13.28    0.58
   5   5  -2   14.09    0.54
   5   5  -2   14.01    0.60
   5   5  -2   14.76    0.56
  -5  -5  -2   13.89    0.54
  -5   5   2   14.22    0.61
   6  -5  -2   10.68    0.48
   6   5   2   10.37    0.50
  -6  -5   2   10.26    0.51
   6   5   2   10.25    0.48
   6   5   2    9.90    0.50
  -6   5  -2    8.94    0.51
   6  -5  -2   10.21    0.55
   6  -5   2   10.17    0.50
   6   5  -2   10.39    0.48
   6   5  -2   11.15    0.49
   6   5  -2   10.74    0.51
  -6  -5  -2   10.38    0.48
  -6   5   2   10.48    0.53
   6  -5   2    9.87    0.54
   7   5   2   27.32    0.97
  -7   5  -2   26.36    1.04
   7   5   2   27.35    0.99
  -7  -5   2   26.33    1.02
   7   5   2   27.33    1.01
   7  -5  -2   27.02    1.08
   7   5  -2   28.98    1.02
   7   5  -2   27.18    0.98
   7   5  -2   28.47    0.98
   7  -5   2   27.90    1.01
   7  -5   2   25.56    1.06
  -7   5   2   27.07    1.05
  -8  -5   2    7.22    0.49
   8  -5  -2    6.35    0.49
   8  -5  -2    6.36    0.40
  -8   5  -2    6.26    0.46
   8   5   2    7.14    0.46
   8  -5   2    6.66    0.49
   8   5  -2    7.03    0.44
  -8   5   2    6.33    0.47
   8  -5   2    6.84    0.46
   8   5  -2    6.44    0.42
  -9  -5   2    7.80    0.56
  -9   5  -2    7.71    0.54
   9   5   2    8.17    0.54
   9  -5  -2    7.11    0.47
   9  -5  -2    8.24    0.58
   9  -5   2    8.13    0.53
   9  -5   2    8.30    0.59
  -9   5   2    8.71    0.58
   9   5  -2    8.27    0.51
  10  -5  -2    6.06    0.48
  10   5   2    6.89    0.57
 -10  -5   2    5.91    0.56
  10  -5  -2    6.73    0.59
 -10   5  -2    5.69    0.54
  10  -5   2    6.80    0.54
  10   5  -2    6.53    0.49
  10  -5   2    6.74    0.60
 -10   5   2    6.83    0.57
  11   5   2    2.19    0.41
 -11  -5   2    2.88    0.49
   0   5  -3    5.41    0.27
   0   5   3    5.23    0.22
   0  -5  -3    4.85    0.24
   0   5   3    5.70    0.30
   0  -5   3    5.09    0.27
   0   5  -3    5.73    0.30
   0   5   3    4.91    0.29
   0   5  -3    5.43    0.23
   0   5  -3    5.25    0.28
  -1   5  -3   52.76    1.56
   1   5   3   55.24    1.66
   1   5   3   52.94    1.63
   1   5   3   54.81    1.49
  -1   5  -3   54.58    1.61
  -1  -5   3   57.00    1.57
   1  -5  -3   54.52    1.53
  -1   5  -3   56.73    1.65
   1   5  -3   56.61    1.54
   1  -5   3   56.43    1.60
  -1  -5  -3   52.03    1.56
   1  -5   3   55.94    1.57
  -1   5   3   57.62    1.57
  -1   5   3   56.73    1.66
   1   5  -3   53.87    1.69
   1   5  -3   55.66    1.58
   1   5  -3   56.30    1.62
   2  -5  -3    8.59    0.34
   2   5   3    8.86    0.30
   2   5   3    9.04    0.36
   2   5   3    8.68    0.41
  -2   5  -3    8.74    0.37
  -2  -5   3    8.97    0.37
  -2   5  -3    9.08    0.41
   2   5   3    8.37    0.40
  -2   5  -3    8.80    0.38
  -2  -5  -3    9.07    0.38
   2   5  -3   10.04    0.35
   2   5  -3    9.46    0.44
   2  -5   3    9.98    0.41
  -2   5   3   10.25    0.41
   2  -5   3    8.88    0.38
  -2   5   3   10.18    0.39
  -2   5   3    9.62    0.44
   2   5  -3    9.08    0.40
   2   5  -3    9.83    0.39
   3   5   3   10.60    0.43
  -3   5  -3    9.80    0.46
  -3   5  -3   11.30    0.42
   3   5   3    9.98    0.46
   3  -5  -3   10.31    0.40
   3   5   3   10.57    0.36
   3   5   3   10.10    0.47
  -3   5  -3   10.35    0.42
   3   5  -3   11.05    0.45
   3   5  -3   10.80    0.42
   3   5  -3   10.46    0.39
  -3   5   3   10.26    0.48
  -3  -5  -3   10.52    0.43
   3   5  -3   10.40    0.49
  -3   5   3   11.13    0.42
   3  -5   3   10.43    0.45
   3  -5   3    9.91    0.44
  -3   5   3   10.96    0.44
   4   5   3   15.89    0.60
  -4   5  -3   16.98    0.68
   4   5   3   16.45    0.66
   4  -5  -3   17.13    0.59
   4   5   3   17.98    0.68
   4  -5   3   16.19    0.65
   4   5  -3   15.48    0.66
  -4   5   3   16.82    0.65
   4   5  -3   17.59    0.59
  -4  -5  -3   17.11    0.62
   4   5  -3   16.89    0.65
   4  -5   3   17.71    0.66
   4   5  -3   18.16    0.62
  -4   5   3   17.84    0.58
   5   5   3    0.38    0.14
   5  -5  -3    0.66    0.13
  -5   5  -3    0.69    0.16
   5  -5  -3    0.49    0.16
   5   5   3    0.62    0.14
   5   5   3    0.68    0.15
   5  -5   3    0.48    0.16
  -5   5   3    0.64    0.16
   5   5  -3    0.67    0.13
   5  -5   3    0.31    0.14
   5   5  -3    0.66    0.14
   5   5  -3    0.51    0.15
  -5  -5  -3    0.62    0.13
  -6  -5   3   36.03    1.28
   6  -5  -3   36.69    1.33
   6   5   3   37.63    1.26
  -6   5  -3   37.23    1.30
   6   5   3   40.13    1.29
   6  -5  -3   37.33    1.18
   6   5  -3   39.42    1.30
   6   5  -3   38.05    1.22
   6   5  -3   38.68    1.22
   6  -5   3   37.35    1.31
  -6   5   3   39.65    1.31
   6  -5   3   36.08    1.26
   7  -5  -3   27.32    0.95
   7  -5  -3   27.32    1.10
   7   5   3   27.96    1.01
  -7   5  -3   27.91    1.07
  -7  -5   3   27.99    1.06
   7   5   3   27.09    1.04
   7   5  -3   28.28    1.00
  -7   5   3   27.88    1.07
   7   5  -3   26.99    1.02
   7   5  -3   29.86    1.01
   7  -5   3   27.80    1.09
   7  -5   3   28.31    1.04
   8  -5  -3    3.22    0.38
  -8  -5   3    3.30    0.37
   8  -5  -3    3.16    0.28
   8   5   3    3.34    0.37
  -8   5  -3    3.61    0.38
   8  -5   3    2.94    0.33
   8   5  -3    3.40    0.32
  -8   5   3    3.20    0.37
   8  -5   3    3.23    0.38
  -9   5  -3    9.60    0.62
   9   5   3   10.10    0.61
   9  -5  -3    9.93    0.66
   9  -5  -3   10.54    0.56
  -9  -5   3   10.81    0.66
   9  -5   3    9.99    0.61
   9   5  -3   11.16    0.58
   9  -5   3   10.62    0.67
  -9   5   3   10.44    0.64
  10   5   3    3.66    0.42
 -10  -5   3    2.98    0.43
 -10   5  -3    2.12    0.39
  10  -5  -3    3.02    0.36
  10  -5  -3    2.77    0.42
 -10   5   3    2.91    0.42
  10   5  -3    3.32    0.38
  10  -5   3    2.63    0.42
   0  -5   4   48.05    1.36
   0  -5  -4   46.47    1.33
   0   5  -4   43.88    1.35
   0   5  -4   46.25    1.40
   0   5  -4   47.62    1.45
   0   5   4   43.01    1.41
   0  -5   4   47.98    1.29
   0   5   4   48.17    1.29
   0   5   4   47.02    1.44
  -1   5  -4   70.27    2.01
   1   5   4   67.83    2.05
  -1   5  -4   69.58    2.04
  -1  -5   4   68.94    1.93
  -1   5  -4   68.41    1.94
   1   5   4   71.23    1.85
   1  -5  -4   67.25    1.89
   1   5   4   68.40    2.02
  -1   5   4   65.57    2.05
   1  -5   4   72.20    1.99
  -1   5   4   69.48    2.06
   1   5  -4   70.70    2.02
   1   5  -4   68.31    2.09
  -1   5   4   72.92    1.94
  -1  -5  -4   68.21    1.94
   1  -5   4   71.50    1.95
   1   5  -4   72.46    1.96
   2   5   4   11.35    0.35
  -2  -5   4   12.02    0.45
  -2   5  -4   12.45    0.48
  -2   5  -4   11.07    0.49
   2   5   4   12.07    0.50
  -2   5  -4   12.71    0.46
   2   5   4   10.34    0.49
   2  -5  -4   11.75    0.42
   2   5   4   11.81    0.43
  -2  -5  -4   11.43    0.43
   2  -5   4   12.19    0.47
   2   5  -4   11.25    0.43
   2   5  -4   10.51    0.49
   2   5  -4   10.92    0.37
   2   5  -4   10.80    0.46
   2  -5   4   11.01    0.43
  -2   5   4   10.86    0.45
  -2   5   4   12.33    0.44
  -2   5   4   10.55    0.49
   3   5   4    0.81    0.08
   3   5   4    0.47    0.12
   3   5   4    0.62    0.14
   3  -5  -4    0.60    0.11
  -3   5  -4    0.75    0.13
  -3   5  -4    0.34    0.12
   3   5   4    0.75    0.13
  -3   5  -4    0.91    0.13
   3   5  -4    0.78    0.10
   3   5  -4    0.75    0.16
  -3   5   4    0.73    0.13
  -3  -5  -4    0.78    0.13
  -3   5   4    0.59    0.13
   3  -5   4    0.78    0.13
   3  -5   4    0.75    0.14
   3   5  -4    0.60    0.13
  -3   5   4    0.92    0.13
   3   5  -4    0.64    0.11
   4   5   4    6.23    0.37
  -4   5  -4    6.68    0.31
  -4   5  -4    6.58    0.39
   4  -5  -4    6.60    0.31
   4   5   4    6.01    0.35
   4   5  -4    7.07    0.33
   4   5  -4    6.66    0.36
   4   5  -4    6.05    0.29
  -4   5   4    5.90    0.38
   4  -5   4    6.90    0.37
  -4   5   4    6.37    0.35
   4  -5   4    6.38    0.36
   4   5  -4    6.80    0.38
  -4  -5  -4    6.48    0.33
  -5   5  -4   31.34    1.09
   5  -5  -4   30.75    0.96
   5   5   4   29.91    1.06
   5  -5  -4   29.87    1.11
   5   5   4   29.43    1.05
   5  -5   4   29.47    1.04
  -5   5   4   31.51    1.06
   5  -5   4   30.95    1.07
  -5  -5  -4   31.88    1.01
   5   5  -4   29.87    1.08
   5   5  -4   30.76    1.06
   5   5  -4   29.16    0.98
   6   5   4    3.40    0.29
  -6  -5   4    3.05    0.32
   6  -5  -4    3.26    0.34
   6  -5  -4    3.07    0.25
  -6   5  -4    3.02    0.31
   6   5   4    3.72    0.33
   6  -5   4    3.44    0.32
  -6   5   4    3.29    0.31
   6   5  -4    3.36    0.31
   6   5  -4    3.25    0.26
   6  -5   4    2.86    0.29
  -7   5  -4   10.72    0.57
   7   5   4   10.27    0.51
   7  -5  -4    9.53    0.46
  -7  -5   4    9.11    0.55
   7   5   4    8.84    0.53
   7  -5  -4    9.19    0.57
   7   5  -4    9.55    0.48
   7  -5   4   10.65    0.60
  -7   5   4   10.11    0.56
   7   5  -4   10.18    0.53
   7  -5   4   10.82    0.56
   8  -5  -4    8.69    0.46
  -8   5  -4    8.22    0.55
  -8  -5   4    9.76    0.59
   8   5   4    9.68    0.57
   8  -5  -4    8.81    0.60
   8  -5   4    9.77    0.57
   8   5  -4    9.32    0.51
   8  -5   4    9.69    0.60
  -8   5   4    9.45    0.58
  -9  -5   4    8.04    0.58
   9   5   4    8.01    0.55
  -9   5  -4    6.98    0.53
   9  -5  -4    7.12    0.45
   9  -5  -4    7.94    0.59
  -9   5   4    7.52    0.54
   9   5  -4    8.10    0.49
   9  -5   4    7.78    0.57
  10  -5  -4    1.76    0.29
  10  -5  -4    1.61    0.38
 -10  -5   4    1.22    0.36
 -10   5  -4    1.30    0.35
  10   5   4    1.40    0.34
 -10   5   4    1.53    0.35
  10  -5   4    1.14    0.34
  10   5  -4    1.66    0.29
   0   5  -5    7.03    0.32
   0   5  -5    6.25    0.34
   0  -5  -5    6.79    0.29
   0   5   5    6.74    0.35
   0   5  -5    6.83    0.36
   0   5   5    6.05    0.35
   0  -5   5    6.95    0.33
   0   5   5    7.25    0.24
   0  -5   5    6.88    0.23
  -1   5  -5    7.87    0.35
   1   5   5    7.10    0.38
  -1   5  -5    7.15    0.37
   1  -5  -5    7.51    0.30
  -1  -5   5    7.66    0.34
  -1   5  -5    7.54    0.37
   1   5   5    7.70    0.38
   1   5  -5    7.41    0.34
  -1   5   5    7.61    0.41
   1  -5   5    8.71    0.31
   1   5  -5    7.45    0.38
  -1   5   5    8.80    0.39
  -1  -5  -5    8.19    0.34
   1   5  -5    8.39    0.41
   1  -5   5    8.69    0.38
  -1   5   5    8.69    0.31
  -2   5  -5   21.91    0.73
   2  -5  -5   21.38    0.66
   2   5   5   21.54    0.78
  -2   5  -5   21.81    0.76
  -2   5  -5   20.98    0.77
   2   5   5   20.72    0.79
  -2   5   5   22.11    0.70
  -2   5   5   20.72    0.80
   2  -5   5   21.78    0.75
   2   5  -5   21.73    0.76
  -2  -5  -5   20.63    0.71
   2  -5   5   22.64    0.71
   2   5  -5   20.94    0.80
  -2   5   5   22.18    0.76
   2   5  -5   22.39    0.72
  -3   5  -5   18.90    0.68
  -3   5  -5   21.06    0.71
   3  -5  -5   19.68    0.64
   3   5   5   19.44    0.75
  -3   5  -5   20.57    0.77
   3   5   5   19.79    0.76
  -3   5   5   21.78    0.73
  -3   5   5   20.24    0.79
   3   5  -5   19.89    0.75
   3  -5   5   21.23    0.75
   3  -5   5   21.49    0.73
  -3   5   5   21.11    0.72
   3   5  -5   20.73    0.79
  -3  -5  -5   20.68    0.71
   3   5  -5   20.69    0.70
  -4   5  -5    8.18    0.37
   4   5   5    7.76    0.42
   4  -5  -5    8.16    0.34
  -4   5  -5    7.96    0.43
   4   5   5    8.20    0.44
  -4   5   5    8.45    0.42
   4  -5   5    9.58    0.46
   4   5  -5    8.88    0.44
   4   5  -5    8.25    0.44
  -4   5   5    9.49    0.38
  -4   5   5    8.73    0.47
  -4  -5  -5    9.12    0.41
   4  -5   5    8.61    0.43
   4   5  -5    8.43    0.39
   5   5   5    6.33    0.40
   5  -5  -5    6.39    0.32
   5   5   5    6.79    0.39
   5  -5  -5    5.90    0.41
  -5   5  -5    6.64    0.41
   5   5  -5    7.28    0.42
   5  -5   5    7.32    0.41
  -5   5   5    6.78    0.40
   5   5  -5    6.91    0.36
   5  -5   5    7.95    0.43
  -5  -5  -5    6.60    0.37
   5   5  -5    6.78    0.40
  -6   5  -5   13.36    0.64
   6  -5  -5   12.81    0.65
   6   5   5   12.17    0.57
   6  -5  -5   12.72    0.52
   6   5   5   12.69    0.62
   6   5  -5   13.56    0.56
   6   5  -5   13.74    0.64
   6  -5   5   13.45    0.64
   6  -5   5   12.88    0.62
  -6   5   5   13.36    0.62
  -7  -5   5    3.76    0.38
   7   5   5    3.84    0.36
   7   5   5    3.76    0.32
  -7   5  -5    4.00    0.37
   7  -5  -5    3.56    0.39
   7  -5  -5    3.81    0.29
   7   5  -5    3.99    0.31
   7  -5   5    4.14    0.40
  -7   5   5    3.76    0.37
   7   5  -5    4.70    0.39
   8  -5  -5    8.04    0.44
  -8   5  -5    8.26    0.55
  -8  -5   5    9.32    0.59
   8  -5  -5    8.66    0.59
   8   5   5    7.99    0.53
   8   5  -5    9.23    0.50
   8  -5   5    8.10    0.56
  -8   5   5    8.89    0.56
   9  -5  -5    2.40    0.28
  -9   5  -5    2.89    0.38
   9  -5  -5    3.11    0.43
   9   5   5    2.84    0.38
  -9  -5   5    2.59    0.39
   9   5  -5    3.26    0.34
  -9   5   5    2.64    0.38
   9  -5   5    2.86    0.41
  10  -5  -5    0.75    0.32
 -10  -5   5    0.97    0.33
  10  -5  -5    0.51    0.23
 -10   5  -5    0.55    0.29
  10   5   5    0.89    0.30
 -10   5   5    0.85    0.32
  10  -5   5    0.74    0.33
  10   5  -5    0.81    0.25
   0   5  -6   13.56    0.55
   0   5  -6   12.42    0.55
   0   5   6   12.24    0.55
   0   5  -6   14.13    0.51
   0  -5  -6   12.60    0.46
   0   5   6   13.77    0.55
   1  -5  -6   40.56    1.14
  -1   5  -6   40.27    1.27
  -1   5  -6   39.99    1.20
  -1   5  -6   39.63    1.28
   1   5   6   37.57    1.27
  -1  -5  -6   38.77    1.18
   1   5  -6   40.20    1.32
  -1   5   6   43.01    1.15
   1   5  -6   40.42    1.20
  -1   5   6   40.55    1.29
   1  -5   6   41.49    1.14
  -1   5   6   40.43    1.31
   1   5  -6   38.22    1.27
  -2   5  -6   26.50    0.84
   2  -5  -6   24.89    0.76
  -2   5  -6   25.32    0.87
   2   5   6   24.58    0.90
   2   5   6   24.98    0.91
  -2   5  -6   25.21    0.89
  -2  -5  -6   24.13    0.80
   2   5  -6   24.63    0.80
   2   5  -6   23.36    0.86
   2   5  -6   24.92    0.91
  -2   5   6   24.47    0.85
   2  -5   6   25.82    0.85
  -2   5   6   26.41    0.79
   2  -5   6   25.90    0.78
  -2   5   6   24.00    0.90
   3   5   6   45.09    1.48
  -3   5  -6   45.89    1.48
  -3   5  -6   46.54    1.44
  -3   5  -6   46.83    1.40
   3   5   6   46.90    1.49
   3  -5  -6   46.94    1.31
  -3   5   6   51.50    1.50
  -3   5   6   50.46    1.46
   3  -5   6   50.56    1.46
   3   5  -6   48.36    1.57
  -3  -5  -6   47.26    1.43
   3   5  -6   47.07    1.50
  -3   5   6   46.18    1.54
   3  -5   6   49.34    1.48
   3   5  -6   46.66    1.41
  -4   5  -6   15.37    0.61
   4   5   6   15.75    0.69
  -4   5  -6   16.75    0.61
   4  -5  -6   16.36    0.55
  -4   5  -6   15.05    0.66
   4   5   6   16.08    0.66
   4  -5   6   16.56    0.64
  -4   5   6   16.54    0.72
   4   5  -6   16.21    0.70
   4   5  -6   17.21    0.68
  -4   5   6   18.34    0.63
   4   5  -6   17.05    0.61
  -4   5   6   17.02    0.65
  -4  -5  -6   15.23    0.61
   5   5   6   29.16    1.09
  -5   5  -6   29.98    1.09
   5   5   6   30.82    1.07
   5   5  -6   32.21    1.04
  -5  -5  -6   32.27    1.07
   5  -5   6   31.97    1.12
   5   5  -6   33.84    1.17
   5   5  -6   32.94    1.15
  -5   5   6   32.44    1.12
   6   5   6   20.39    0.82
  -6   5  -6   21.49    0.88
   6  -5  -6   22.12    0.92
   6   5   6   18.91    0.85
   6  -5  -6   22.42    0.74
  -6   5   6   22.59    0.89
   6   5  -6   21.44    0.80
   6   5  -6   23.47    0.92
   6  -5   6   22.64    0.90
   6   5  -6   23.34    0.92
   7   5   6    4.35    0.35
   7  -5  -6    3.89    0.39
  -7   5  -6    3.40    0.36
   7   5   6    3.50    0.36
   7  -5  -6    3.51    0.27
  -7   5   6    3.68    0.37
   7  -5   6    4.39    0.40
   7   5  -6    4.66    0.39
   7   5  -6    4.19    0.31
   8   5   6    0.60    0.22
  -8  -5   6    0.45    0.24
   8  -5  -6    0.53    0.17
   8  -5  -6    0.37    0.22
  -8   5  -6    0.16    0.20
   8  -5   6    0.15    0.23
  -8   5   6   -0.04    0.20
   8   5  -6    0.56    0.19
   9  -5  -6    2.28    0.29
   9   5   6    3.49    0.44
  -9  -5   6    2.70    0.42
   9  -5  -6    3.83    0.45
  -9   5  -6    3.51    0.42
   9   5  -6    2.63    0.30
  -9   5   6    3.05    0.41
   9  -5   6    3.04    0.41
  10   5   6    4.78    0.52
  10  -5  -6    4.92    0.56
  10  -5  -6    4.74    0.40
 -10  -5   6    4.66    0.54
 -10   5  -6    3.58    0.46
  10  -5   6    5.61    0.56
 -10   5   6    5.02    0.54
  10   5  -6    4.86    0.43
   0   5  -7   21.64    0.79
   0   5  -7   21.43    0.71
   0   5   7   19.78    0.76
   0  -5  -7   20.03    0.66
   0   5  -7   20.75    0.77
   0   5   7   20.73    0.79
   1   5   7   46.19    1.50
   1  -5  -7   46.28    1.32
  -1   5  -7   47.95    1.49
   1   5   7   46.40    1.49
  -1   5  -7   44.69    1.46
  -1   5  -7   48.59    1.40
  -1   5   7   45.02    1.48
  -1   5   7   48.80    1.53
   1   5  -7   49.42    1.54
   1   5  -7   46.13    1.39
  -1  -5  -7   46.67    1.37
   1   5  -7   48.62    1.48
   2   5   7   40.15    1.37
  -2   5  -7   41.73    1.35
   2  -5  -7   42.40    1.19
   2   5   7   42.14    1.37
  -2   5  -7   41.71    1.28
  -2   5  -7   41.89    1.34
  -2   5   7   45.48    1.37
   2   5  -7   43.24    1.27
   2   5  -7   40.86    1.35
  -2   5   7   45.29    1.27
   2   5  -7   41.71    1.41
   2  -5   7   42.38    1.24
  -2  -5  -7   42.13    1.27
  -2   5   7   42.23    1.41
   3  -5  -7   22.61    0.67
   3   5   7   20.19    0.83
  -3   5  -7   22.09    0.77
   3   5   7   21.14    0.82
  -3   5  -7   21.81    0.79
  -3   5  -7   20.77    0.82
  -3   5   7   22.01    0.74
  -3   5   7   20.34    0.83
   3   5  -7   21.49    0.72
   3   5  -7   21.06    0.84
   3   5  -7   21.81    0.81
  -3  -5  -7   20.32    0.73
   3  -5   7   22.82    0.73
  -3   5   7   22.42    0.78
  -4   5  -7   38.38    1.19
   4   5   7   35.34    1.24
   4   5   7   34.85    1.26
   4  -5  -7   36.65    1.07
  -4   5  -7   37.11    1.17
  -4   5  -7   35.26    1.24
  -4   5   7   38.09    1.32
  -4   5   7   36.09    1.21
  -4   5   7   39.57    1.22
   4   5  -7   37.19    1.31
  -4  -5  -7   36.93    1.20
   4  -5   7   41.70    1.23
   4   5  -7   37.02    1.28
   4   5  -7   39.17    1.17
   5   5   7    9.08    0.49
  -5   5  -7    9.83    0.53
   5   5   7    9.58    0.53
   5  -5  -7    9.73    0.39
   5  -5   7   10.89    0.51
  -5  -5  -7   10.08    0.48
   5   5  -7    9.42    0.52
  -5   5   7    9.36    0.54
  -5   5   7   10.63    0.51
   5   5  -7    9.85    0.45
   5   5  -7   10.52    0.53
  -6   5  -7    6.38    0.45
   6   5   7    6.01    0.44
   6   5   7    5.87    0.41
   6  -5  -7    6.08    0.47
   6  -5  -7    7.01    0.33
   6   5  -7    6.03    0.36
   6  -5   7    6.75    0.42
   6   5  -7    5.99    0.41
  -6   5   7    6.00    0.42
   6   5  -7    5.99    0.43
  -7   5  -7    2.51    0.32
   7  -5  -7    1.79    0.31
   7   5   7    2.43    0.29
   7  -5  -7    2.13    0.23
   7   5   7    2.84    0.33
   7   5  -7    2.56    0.34
  -7   5   7    2.46    0.32
   7   5  -7    2.45    0.26
   7   5  -7    2.16    0.31
   7  -5   7    2.60    0.31
   8  -5  -7    2.20    0.23
   8  -5  -7    1.44    0.31
   8   5   7    1.98    0.33
  -8   5  -7    1.76    0.32
  -8   5   7    1.96    0.34
   8   5  -7    2.04    0.26
   8  -5   7    2.30    0.33
   9  -5  -7    0.80    0.32
  -9  -5   7    0.85    0.32
   9   5   7    0.51    0.26
   9  -5  -7    1.08    0.21
  -9   5  -7    0.34    0.26
   9  -5   7    0.29    0.27
   9   5  -7    1.24    0.26
  -9   5   7    1.36    0.33
 -10  -5   7    3.92    0.53
 -10   5  -7    4.12    0.49
  10   5  -7    4.68    0.42
  10  -5   7    5.45    0.57
 -10   5   7    4.40    0.51
   0   5  -8    3.51    0.27
   0   5  -8    3.32    0.24
   0   5   8    3.50    0.30
   0   5   8    3.56    0.27
   0   5  -8    3.35    0.28
   0  -5  -8    3.80    0.21
   1   5   8   15.29    0.64
   1   5   8   15.22    0.66
  -1   5  -8   15.25    0.65
   1  -5  -8   16.01    0.52
  -1   5  -8   15.66    0.58
  -1   5  -8   15.15    0.64
  -1   5   8   15.94    0.64
   1   5  -8   15.75    0.67
  -1  -5  -8   16.29    0.56
  -1   5   8   15.72    0.68
   1   5  -8   15.73    0.58
   1   5  -8   15.62    0.64
   2   5   8    9.08    0.49
   2  -5  -8    9.32    0.34
  -2   5  -8    9.06    0.45
  -2   5  -8    8.94    0.42
   2   5   8    8.32    0.45
  -2   5  -8   10.13    0.49
   2   5  -8    8.54    0.47
  -2   5   8    9.48    0.50
  -2  -5  -8    9.49    0.40
   2   5  -8    9.30    0.39
   2   5  -8    8.93    0.46
  -2   5   8    9.89    0.45
  -3   5  -8   42.31    1.25
   3   5   8   37.37    1.33
  -3   5  -8   40.30    1.33
   3  -5  -8   39.23    1.13
  -3   5  -8   39.73    1.30
   3   5   8   38.03    1.32
  -3   5   8   42.47    1.27
  -3  -5  -8   40.83    1.26
   3   5  -8   42.10    1.41
  -3   5   8   41.31    1.32
   3   5  -8   40.07    1.23
   3   5  -8   40.70    1.35
  -3   5   8   40.04    1.38
   4  -5  -8   59.31    1.64
  -4   5  -8   57.00    1.85
  -4   5  -8   60.99    1.77
   4   5   8   57.79    1.86
  -4   5  -8   59.90    1.82
   4   5   8   58.24    1.88
  -4   5   8   55.79    1.82
   4  -5   8   63.47    1.80
  -4   5   8   59.16    1.92
  -4   5   8   60.61    1.81
  -4  -5  -8   60.29    1.78
   4   5  -8   59.41    1.88
   4   5  -8   61.80    1.75
   4   5  -8   61.48    1.94
   5   5   8   14.92    0.66
  -5   5  -8   15.17    0.70
   5   5   8   13.62    0.68
   5  -5  -8   14.72    0.52
  -5   5   8   14.21    0.71
   5   5  -8   15.72    0.71
   5  -5   8   17.08    0.68
   5   5  -8   15.33    0.60
  -5   5   8   17.00    0.69
   5   5  -8   16.78    0.74
  -5  -5  -8   16.01    0.65
   6  -5  -8   10.47    0.43
   6  -5  -8   11.00    0.63
   6   5   8   10.88    0.55
  -6   5  -8   10.44    0.59
   6   5   8   11.40    0.61
   6   5  -8   12.57    0.64
   6   5  -8   11.50    0.62
  -6   5   8   12.19    0.60
   6  -5   8   11.55    0.58
   6   5  -8   11.04    0.51
   7   5   8    2.11    0.28
   7  -5  -8    2.23    0.22
  -7   5  -8    2.31    0.33
   7   5   8    1.73    0.30
   7  -5  -8    1.76    0.31
   7   5  -8    2.48    0.32
   7   5  -8    2.15    0.25
  -7   5   8    2.28    0.33
   7  -5   8    2.28    0.31
   7   5  -8    1.95    0.30
   8  -5  -8    0.96    0.18
   8  -5  -8    0.95    0.28
  -8   5  -8    0.47    0.24
   8   5  -8    0.69    0.26
  -8   5   8    0.80    0.27
   8  -5   8    0.97    0.29
   8   5  -8    0.92    0.21
  -9   5  -8   13.77    0.78
   9   5   8   15.06    0.83
   9  -5  -8   15.61    0.87
   9  -5  -8   13.71    0.61
   9   5  -8   14.47    0.82
   9   5  -8   15.29    0.70
   9  -5   8   16.04    0.82
  -9   5   8   15.97    0.84
  10  -5   8    3.64    0.46
   0   5   9    3.25    0.29
   0   5  -9    3.51    0.29
   0   5  -9    3.70    0.29
   0  -5  -9    3.57    0.21
   0   5   9    3.36    0.31
   0   5  -9    3.92    0.26
  -1   5  -9   14.31    0.56
  -1   5  -9   13.95    0.62
   1   5   9   13.72    0.61
   1   5   9   14.21    0.65
   1  -5  -9   14.60    0.48
  -1   5  -9   13.46    0.62
   1   5  -9   14.77    0.64
  -1   5   9   15.17    0.68
   1   5  -9   15.28    0.67
   1   5  -9   14.99    0.56
  -1  -5  -9   15.52    0.54
  -1   5   9   14.55    0.63
   2  -5  -9    5.89    0.26
  -2   5  -9    5.72    0.37
  -2   5  -9    5.56    0.33
  -2   5  -9    5.85    0.38
   2   5   9    6.30    0.41
   2   5   9    5.94    0.38
  -2  -5  -9    6.62    0.33
   2   5  -9    6.76    0.33
   2   5  -9    5.79    0.39
  -2   5   9    6.01    0.36
  -2   5   9    6.27    0.41
   2   5  -9    6.08    0.38
  -3   5  -9    5.61    0.36
  -3   5  -9    5.71    0.38
  -3   5  -9    5.80    0.35
   3   5   9    4.88    0.36
   3   5   9    5.33    0.39
   3  -5  -9    5.88    0.25
   3   5  -9    6.29    0.32
   3   5  -9    6.58    0.40
  -3   5   9    5.87    0.36
  -3   5   9    6.58    0.43
  -3  -5  -9    6.59    0.35
   3   5  -9    5.93    0.41
   4  -5  -9    2.10    0.17
   4   5   9    1.93    0.27
   4   5   9    2.05    0.25
  -4   5  -9    1.98    0.26
  -4   5  -9    2.41    0.24
  -4   5  -9    2.87    0.27
  -4   5   9    2.44    0.25
  -4   5   9    2.55    0.31
  -4  -5  -9    2.14    0.23
  -4   5   9    2.63    0.25
   4   5  -9    2.53    0.22
   4   5  -9    2.58    0.29
   4   5  -9    2.15    0.27
  -5   5  -9    0.20    0.16
   5   5   9    0.39    0.17
   5   5   9    0.61    0.19
   5  -5  -9    0.33    0.11
  -5  -5  -9    0.15    0.15
   5   5  -9    0.08    0.18
  -5   5   9    0.29    0.19
   5   5  -9    0.39    0.18
  -5   5   9    0.11    0.17
   5   5  -9    0.17    0.12
   6  -5  -9    5.32    0.45
   6   5   9    5.05    0.39
   6  -5  -9    5.03    0.28
  -6   5  -9    5.26    0.42
   6   5   9    5.23    0.43
   6   5  -9    5.85    0.44
   6   5  -9    5.69    0.34
  -6   5   9    5.81    0.43
   6  -5   9    5.86    0.41
   6   5  -9    5.32    0.44
  -7   5  -9   21.00    0.94
   7   5   9   22.08    0.90
   7  -5  -9   20.77    0.73
   7   5   9   21.09    0.96
   7  -5  -9   22.01    1.00
   7   5  -9   22.99    1.00
   7  -5   9   24.02    0.96
   7   5  -9   23.42    0.86
   7   5  -9   23.37    0.99
  -7   5   9   23.10    0.99
   8  -5  -9    1.21    0.32
   8   5   9    1.02    0.29
  -8   5  -9    1.27    0.29
   8  -5  -9    1.44    0.20
  -8   5   9    1.48    0.31
   8  -5   9    1.91    0.33
   8   5  -9    1.68    0.33
   8   5  -9    1.92    0.26
   9  -5  -9    7.58    0.43
   9   5   9    7.84    0.62
  -9   5  -9    7.82    0.60
   9  -5  -9    8.97    0.69
   9  -5   9    9.86    0.65
   9   5  -9    8.62    0.63
   9   5  -9    9.46    0.52
  -9   5   9    7.99    0.62
   0   5 -10   20.57    0.73
   0   5  10   20.26    0.81
   0   5 -10   21.66    0.85
   0  -5 -10   19.65    0.66
   0   5 -10   19.94    0.81
   0   5  10   20.25    0.83
   1  -5 -10   30.82    0.91
  -1   5 -10   30.39    1.11
   1   5  10   30.55    1.12
   1   5  10   31.57    1.11
  -1   5 -10   30.51    1.09
  -1   5 -10   28.63    0.99
  -1   5  10   30.27    1.13
  -1   5  10   30.77    1.10
   1   5 -10   30.92    1.09
   1   5 -10   32.85    1.15
   1   5 -10   31.12    0.99
  -1  -5 -10   29.47    0.96
   2   5  10    9.88    0.54
  -2   5 -10   10.05    0.47
   2  -5 -10    9.80    0.36
   2   5  10    9.26    0.50
  -2   5 -10    9.90    0.52
  -2   5 -10    9.04    0.49
   2   5 -10    9.04    0.52
   2   5 -10    9.39    0.49
  -2  -5 -10    9.72    0.42
  -2   5  10    9.92    0.49
   2   5 -10    9.48    0.42
  -2   5  10    9.63    0.53
  -3   5 -10    4.28    0.31
   3   5  10    4.91    0.39
  -3   5 -10    4.20    0.32
   3  -5 -10    3.72    0.20
   3   5  10    3.90    0.32
  -3   5 -10    4.27    0.34
   3   5 -10    4.87    0.29
  -3   5  10    4.94    0.38
   3   5 -10    4.74    0.37
   3   5 -10    4.69    0.36
  -3   5  10    4.75    0.34
  -3  -5 -10    4.85    0.30
  -4   5 -10    2.09    0.25
   4  -5 -10    2.16    0.16
   4   5  10    2.38    0.29
  -4   5 -10    1.89    0.27
   4   5  10    2.06    0.25
  -4   5 -10    1.60    0.23
  -4  -5 -10    2.55    0.24
  -4   5  10    2.31    0.25
   4   5 -10    2.32    0.29
   4   5 -10    2.50    0.21
  -4   5  10    1.83    0.29
   4   5 -10    2.43    0.29
   5  -5 -10   19.87    0.65
   5   5  10   19.82    0.85
  -5   5 -10   20.79    0.89
   5   5  10   20.52    0.90
   5   5 -10   18.98    0.71
   5   5 -10   19.52    0.85
  -5   5  10   19.82    0.89
  -5   5  10   21.07    0.82
  -5  -5 -10   20.43    0.79
   5   5 -10   20.86    0.89
   6   5  10    2.70    0.31
   6  -5 -10    2.17    0.33
   6  -5 -10    2.06    0.19
  -6   5 -10    1.46    0.28
   6   5  10    1.94    0.31
   6   5 -10    2.32    0.23
   6   5 -10    1.80    0.29
  -6   5  10    2.35    0.30
   6   5 -10    2.13    0.32
  -7   5 -10    6.18    0.50
   7   5  10    5.89    0.51
   7   5  10    5.82    0.44
   7  -5 -10    6.77    0.55
   7  -5 -10    6.00    0.32
  -7   5  10    6.44    0.49
   7   5 -10    5.99    0.38
   7   5 -10    5.55    0.49
   7   5 -10    6.01    0.48
  -8   5 -10    2.99    0.40
   8  -5 -10    3.50    0.45
   8  -5 -10    3.23    0.26
   8   5  10    3.02    0.41
   8   5 -10    3.78    0.44
   8   5 -10    3.58    0.33
  -8   5  10    3.84    0.45
   9  -5 -10    2.80    0.27
   9  -5 -10    2.48    0.44
  -9   5 -10    2.13    0.39
   9   5 -10    3.09    0.32
  -9   5  10    2.69    0.45
   0   5 -11   12.99    0.53
   0  -5 -11   12.95    0.47
   0   5 -11   12.68    0.62
   0   5 -11   12.22    0.59
   0   5  11   12.60    0.60
   0   5  11   11.87    0.61
  -1   5 -11   17.47    0.66
  -1   5 -11   16.70    0.74
   1  -5 -11   16.43    0.57
  -1   5 -11   17.10    0.75
   1   5  11   17.57    0.75
   1   5  11   17.20    0.77
   1   5 -11   15.52    0.74
  -1   5  11   17.20    0.72
   1   5 -11   17.06    0.72
  -1   5  11   15.67    0.73
   1   5 -11   17.45    0.63
  -1  -5 -11   15.93    0.59
  -2   5 -11    7.54    0.46
  -2   5 -11    8.66    0.43
  -2   5 -11    7.28    0.45
   2   5  11    7.04    0.47
   2   5  11    7.78    0.46
   2  -5 -11    7.79    0.31
   2   5 -11    7.02    0.44
   2   5 -11    7.72    0.49
  -2   5  11    8.65    0.46
   2   5 -11    7.05    0.36
  -2  -5 -11    7.51    0.37
  -2   5  11    7.85    0.49
   3  -5 -11   10.39    0.38
  -3   5 -11   10.29    0.50
   3   5  11   10.78    0.59
  -3   5 -11   10.54    0.55
   3   5  11   10.43    0.56
  -3   5 -11   10.43    0.56
  -3  -5 -11   10.02    0.47
   3   5 -11   10.14    0.54
   3   5 -11    9.99    0.57
   3   5 -11    9.95    0.44
  -3   5  11   10.06    0.57
  -3   5  11   11.14    0.54
   4  -5 -11    1.53    0.14
   4   5  11    2.04    0.29
  -4   5 -11    1.47    0.24
  -4   5 -11    1.68    0.24
   4   5  11    1.35    0.24
  -4   5 -11    1.64    0.24
   4   5 -11    1.65    0.19
  -4   5  11    1.89    0.31
  -4   5  11    1.54    0.23
   4   5 -11    1.48    0.25
   4   5 -11    1.57    0.28
  -4  -5 -11    1.79    0.22
   5  -5 -11   12.29    0.44
   5   5  11   11.21    0.61
   5   5  11   12.18    0.67
  -5   5 -11   11.89    0.65
  -5  -5 -11   12.11    0.58
  -5   5  11   12.18    0.69
   5   5 -11   12.68    0.66
   5   5 -11   11.78    0.51
   5   5 -11   12.60    0.67
   6  -5 -11    3.65    0.24
   6   5  11    3.14    0.39
   6   5  11    3.87    0.37
   6  -5 -11    4.25    0.42
  -6   5 -11    3.11    0.38
   6   5 -11    3.75    0.30
   6   5 -11    3.68    0.40
   6   5 -11    4.26    0.43
   7   5  11   -0.08    0.18
   7  -5 -11    0.15    0.13
   7  -5 -11   -0.04    0.23
  -7   5 -11    0.02    0.22
   7   5  11    0.15    0.24
   7   5 -11    0.07    0.22
   7   5 -11    0.12    0.16
   8  -5 -11    2.82    0.25
   8   5  11    3.19    0.44
   8  -5 -11    3.23    0.43
  -8   5 -11    2.80    0.40
  -8   5  11    3.20    0.45
   8   5 -11    2.75    0.42
   8   5 -11    3.15    0.31
  -9   5 -11    2.21    0.42
  -9   5  11    2.75    0.46
   0  -5 -12    8.57    0.37
   0   5  12    9.08    0.53
   0   5  12    8.41    0.50
   0   5 -12    8.76    0.52
   0   5 -12    8.25    0.41
   0   5 -12    8.41    0.50
  -1   5 -12   13.94    0.68
   1   5  12   13.74    0.67
   1   5  12   14.43    0.71
   1  -5 -12   14.61    0.51
  -1   5 -12   14.61    0.60
  -1   5 -12   14.70    0.69
  -1   5  12   15.16    0.69
   1   5 -12   14.24    0.72
  -1  -5 -12   14.63    0.56
  -1   5  12   15.11    0.72
   1   5 -12   14.97    0.59
   1   5 -12   16.03    0.71
   2   5  12    0.58    0.19
  -2   5 -12    0.67    0.21
  -2   5 -12    0.95    0.21
   2  -5 -12    0.97    0.12
  -2   5 -12    1.00    0.19
   2   5  12    1.00    0.23
  -2   5  12    0.47    0.20
  -2  -5 -12    0.79    0.15
   2   5 -12    0.64    0.14
   2   5 -12    0.61    0.20
   2   5 -12    0.76    0.22
  -2   5  12    1.00    0.21
   3   5  12   12.60    0.64
   3   5  12   13.87    0.70
  -3   5 -12   14.11    0.61
   3  -5 -12   12.73    0.44
  -3   5 -12   13.54    0.66
  -3   5 -12   12.30    0.65
   3   5 -12   12.85    0.64
  -3  -5 -12   13.89    0.57
   3   5 -12   11.65    0.66
  -3   5  12   13.36    0.68
  -3   5  12   13.87    0.64
   3   5 -12   12.74    0.53
  -4   5 -12    4.73    0.39
   4   5  12    4.59    0.44
   4  -5 -12    5.16    0.24
  -4   5 -12    5.68    0.39
   4   5  12    4.90    0.38
  -4   5 -12    5.55    0.45
   4   5 -12    5.35    0.31
  -4   5  12    5.76    0.46
  -4  -5 -12    6.47    0.38
   4   5 -12    5.43    0.45
  -4   5  12    5.23    0.38
   4   5 -12    5.37    0.45
   5   5  12   17.12    0.84
   5  -5 -12   17.51    0.56
  -5   5 -12   17.19    0.82
   5   5  12   15.71    0.77
  -5  -5 -12   16.60    0.71
   5   5 -12   16.41    0.81
  -5   5  12   16.77    0.83
   5   5 -12   16.59    0.80
   5   5 -12   16.30    0.63
   6   5  12    7.38    0.56
   6   5  12    7.02    0.49
   6  -5 -12    6.88    0.53
  -6   5 -12    6.83    0.51
   6  -5 -12    7.29    0.32
   6   5 -12    7.37    0.53
   6   5 -12    7.35    0.54
   6   5 -12    8.23    0.42
   7  -5 -12    7.24    0.59
   7   5  12    7.30    0.60
  -7   5 -12    7.27    0.55
   7   5  12    6.56    0.50
   7  -5 -12    7.08    0.34
   7   5 -12    7.84    0.58
   7   5 -12    6.40    0.40
   8  -5 -12   10.17    0.72
   8   5  12    9.40    0.69
  -8   5 -12    9.88    0.67
   8  -5 -12    9.23    0.43
   8   5 -12    9.95    0.52
   8   5 -12   10.50    0.69
   0  -5 -13    4.55    0.26
   0   5 -13    5.63    0.42
   0   5 -13    4.71    0.38
   0   5  13    4.55    0.42
   0   5  13    4.94    0.38
   0   5 -13    4.02    0.31
   1  -5 -13    4.18    0.24
   1   5  13    4.62    0.42
  -1   5 -13    3.96    0.37
  -1   5 -13    4.03    0.31
  -1   5 -13    3.65    0.36
   1   5  13    4.07    0.36
  -1  -5 -13    4.38    0.27
  -1   5  13    4.13    0.39
   1   5 -13    4.16    0.38
   1   5 -13    4.68    0.41
   1   5 -13    4.68    0.31
  -1   5  13    4.82    0.38
  -2   5 -13    0.66    0.22
   2  -5 -13    0.85    0.12
  -2   5 -13    0.96    0.19
   2   5  13    1.12    0.25
   2   5  13    1.23    0.23
  -2   5 -13    1.35    0.25
  -2   5  13    0.68    0.22
   2   5 -13    0.62    0.22
  -2   5  13    1.34    0.24
   2   5 -13    0.99    0.21
  -2  -5 -13    1.09    0.17
   2   5 -13    1.22    0.17
   3   5  13    5.48    0.43
  -3   5 -13    6.95    0.43
   3  -5 -13    6.84    0.29
  -3   5 -13    6.22    0.45
   3   5  13    6.35    0.49
  -3   5 -13    7.30    0.49
  -3   5  13    6.93    0.45
  -3  -5 -13    7.16    0.39
   3   5 -13    6.79    0.49
   3   5 -13    7.11    0.48
  -3   5  13    6.83    0.49
   3   5 -13    6.87    0.37
  -4   5 -13    3.53    0.34
   4   5  13    3.46    0.41
   4   5  13    3.35    0.35
  -4   5 -13    3.52    0.37
  -4   5 -13    4.05    0.41
   4  -5 -13    3.51    0.20
   4   5 -13    3.78    0.38
  -4  -5 -13    3.42    0.30
   4   5 -13    3.26    0.26
  -4   5  13    3.10    0.40
   4   5 -13    3.24    0.38
  -4   5  13    3.80    0.35
   5   5  13    5.17    0.43
   5  -5 -13    5.18    0.26
  -5   5 -13    6.05    0.49
   5   5  13    5.48    0.50
   5   5 -13    5.70    0.47
  -5   5  13    5.96    0.53
  -5  -5 -13    6.28    0.42
   5   5 -13    5.08    0.33
   5   5 -13    5.71    0.49
   6  -5 -13    4.59    0.47
   6   5  13    4.45    0.48
  -6   5 -13    4.23    0.45
   6   5  13    5.10    0.46
   6  -5 -13    4.66    0.25
   6   5 -13    4.22    0.46
   6   5 -13    5.22    0.47
   6   5 -13    4.58    0.32
   7  -5 -13    5.65    0.31
   7   5  13    5.98    0.49
   7  -5 -13    7.54    0.61
   7   5  13    6.80    0.62
  -7   5 -13    6.11    0.57
   7   5 -13    7.05    0.56
   7   5 -13    6.61    0.40
  -8   5 -13    6.03    0.58
   8  -5 -13    6.33    0.60
   0   5  14    4.86    0.43
   0   5  14    5.14    0.43
   0   5 -14    4.71    0.34
   0   5 -14    4.82    0.44
   0  -5 -14    4.51    0.27
   0   5 -14    4.92    0.42
   1  -5 -14   15.52    0.56
  -1   5 -14   15.68    0.78
   1   5  14   15.62    0.77
   1   5  14   16.75    0.80
  -1   5 -14   15.80    0.67
  -1   5 -14   15.75    0.76
   1   5 -14   15.24    0.79
  -1   5  14   16.48    0.80
   1   5 -14   17.05    0.77
  -1   5  14   15.31    0.75
  -1  -5 -14   15.66    0.60
   1   5 -14   15.58    0.63
  -2   5 -14    3.83    0.39
  -2   5 -14    5.16    0.44
   2  -5 -14    3.72    0.23
   2   5  14    4.22    0.42
   2   5  14    3.93    0.38
  -2   5 -14    4.09    0.34
   2   5 -14    3.81    0.40
  -2   5  14    4.46    0.43
   2   5 -14    4.04    0.29
  -2   5  14    4.39    0.40
  -2  -5 -14    3.88    0.28
   2   5 -14    4.04    0.39
   3   5  14    3.29    0.40
   3   5  14    2.40    0.31
  -3   5 -14    3.38    0.37
   3  -5 -14    2.84    0.20
  -3   5 -14    3.22    0.36
  -3   5 -14    2.68    0.29
   3   5 -14    3.43    0.38
   3   5 -14    3.29    0.26
  -3   5  14    2.98    0.35
  -3   5  14    2.93    0.37
  -3  -5 -14    3.05    0.28
   3   5 -14    3.40    0.40
  -4   5 -14    1.52    0.31
   4   5  14    1.05    0.25
  -4   5 -14    0.97    0.28
  -4   5 -14    1.09    0.25
   4  -5 -14    1.33    0.14
   4   5  14    1.43    0.34
   4   5 -14    1.53    0.30
  -4  -5 -14    1.59    0.24
   4   5 -14    0.93    0.27
  -4   5  14    0.77    0.28
   4   5 -14    1.10    0.18
  -4   5  14    0.92    0.24
   5   5  14    5.39    0.47
   5  -5 -14    5.68    0.27
   5   5  14    6.04    0.53
  -5   5 -14    5.92    0.51
  -5   5  14    6.00    0.52
   5   5 -14    5.24    0.34
   5   5 -14    6.09    0.52
  -5  -5 -14    6.06    0.43
   5   5 -14    6.78    0.56
   6  -5 -14   -0.32    0.24
   6   5  14   -0.03    0.24
   6   5  14    0.06    0.28
   6  -5 -14   -0.03    0.11
  -6   5 -14   -0.05    0.24
   6   5 -14    0.22    0.31
   6   5 -14    0.12    0.20
   6   5 -14    0.04    0.15
  -7   5 -14    0.48    0.29
   7  -5 -14    1.63    0.37
   7  -5 -14    0.87    0.16
   7   5  14    0.20    0.27
   0   5 -15   -0.39    0.16
   0   5  15   -0.24    0.21
   0   5 -15    0.02    0.19
   0  -5 -15   -0.04    0.11
   0   5  15    0.00    0.18
   0   5 -15   -0.03    0.13
   1   5  15    0.54    0.25
   1  -5 -15    0.83    0.15
  -1   5 -15    0.70    0.26
  -1   5 -15    0.85    0.25
   1   5  15    0.94    0.25
  -1   5 -15    0.60    0.20
  -1  -5 -15    0.65    0.15
  -1   5  15    0.68    0.25
   1   5 -15    0.54    0.17
   1   5 -15    0.33    0.23
  -1   5  15    0.60    0.21
   1   5 -15    0.85    0.23
   2   5  15    1.89    0.31
   2   5  15    2.04    0.35
  -2   5 -15    2.31    0.33
  -2   5 -15    2.70    0.35
  -2   5 -15    2.02    0.28
   2  -5 -15    2.04    0.18
   2   5 -15    2.60    0.36
  -2  -5 -15    2.28    0.24
  -2   5  15    2.32    0.33
   2   5 -15    2.23    0.23
   2   5 -15    2.85    0.33
  -2   5  15    2.28    0.34
  -3   5 -15    6.37    0.49
   3   5  15    6.56    0.52
   3  -5 -15    5.95    0.28
  -3   5 -15    5.72    0.41
  -3   5 -15    6.74    0.51
   3   5  15    6.18    0.48
  -3  -5 -15    5.95    0.38
  -3   5  15    5.82    0.46
  -3   5  15    6.18    0.53
   3   5 -15    5.89    0.37
   3   5 -15    6.30    0.52
   3   5 -15    5.98    0.47
   4  -5 -15    9.39    0.36
   4   5  15    8.98    0.62
  -4   5 -15    8.95    0.53
   4   5  15    8.53    0.58
  -4   5 -15    8.49    0.58
  -4   5 -15    8.75    0.61
  -4  -5 -15    8.71    0.50
  -4   5  15    9.38    0.58
   4   5 -15    8.80    0.62
   4   5 -15    8.98    0.45
  -4   5  15    8.66    0.61
   4   5 -15    9.18    0.59
   5  -5 -15    0.43    0.12
   5   5  15    0.30    0.23
  -5   5 -15    0.51    0.28
   5   5  15   -0.24    0.24
   5   5 -15    0.63    0.26
   5   5 -15    0.22    0.16
   5   5 -15    0.54    0.29
  -5   5  15    0.26    0.27
  -5  -5 -15    0.36    0.21
   6  -5 -15    4.39    0.49
   6   5  15    4.66    0.53
   6   5  15    4.38    0.48
  -6   5 -15    5.32    0.52
   6   5 -15    4.44    0.51
   6   5 -15    5.05    0.51
   6   5 -15    4.03    0.32
   0  -5 -16   14.01    0.55
   0   5  16   13.18    0.72
   0   5 -16   13.54    0.76
   0   5  16   12.96    0.74
   0   5 -16   13.74    0.72
   0   5 -16   12.69    0.60
  -1   5 -16    6.56    0.49
  -1   5 -16    6.05    0.41
   1   5  16    5.51    0.47
  -1   5 -16    5.28    0.51
   1  -5 -16    5.61    0.31
   1   5  16    6.04    0.51
   1   5 -16    6.11    0.38
  -1   5  16    5.64    0.47
   1   5 -16    6.39    0.49
  -1   5  16    6.49    0.53
   1   5 -16    5.66    0.54
  -1  -5 -16    5.97    0.35
   2  -5 -16    0.20    0.12
  -2   5 -16   -0.13    0.22
   2   5  16    0.16    0.19
   2   5  16    0.01    0.24
  -2   5 -16    0.17    0.25
  -2   5 -16    0.22    0.19
   2   5 -16    0.26    0.23
  -2   5  16    0.23    0.26
   2   5 -16    0.07    0.25
   2   5 -16    0.22    0.17
  -2  -5 -16    0.54    0.17
  -2   5  16    0.22    0.22
  -3   5 -16    8.01    0.58
  -3   5 -16    8.53    0.51
   3  -5 -16    7.95    0.34
   3   5  16    7.03    0.54
  -3   5 -16    6.93    0.55
   3   5  16    8.73    0.63
   3   5 -16    7.74    0.42
  -3   5  16    8.83    0.61
  -3   5  16    7.34    0.53
   3   5 -16    6.98    0.57
   3   5 -16    7.41    0.53
  -3  -5 -16    7.26    0.43
  -4   5 -16    1.53    0.33
  -4   5 -16    0.78    0.32
   4   5  16    1.28    0.32
  -4   5 -16    1.79    0.31
   4  -5 -16    1.60    0.15
   4   5  16    0.71    0.29
   4   5 -16    1.26    0.21
   4   5 -16    1.38    0.31
  -4   5  16    1.88    0.35
  -4  -5 -16    1.44    0.25
   4   5 -16    1.11    0.33
  -5   5 -16    3.10    0.45
   5   5  16    2.13    0.36
   5   5  16    2.80    0.43
   5   5 -16    2.75    0.39
   5   5 -16    2.23    0.26
  -5   5  16    2.43    0.44
   5   5 -16    2.42    0.41
  -5  -5 -16    2.29    0.31
   0  -5 -17    0.44    0.17
   0   5 -17    0.29    0.24
   0   5 -17    0.48    0.21
   0   5  17    0.27    0.23
   0   5 -17    0.48    0.24
   0   5  17    0.09    0.26
   1   5  17   11.65    0.71
   1  -5 -17   11.51    0.48
   1   5  17   11.52    0.70
  -1   5 -17   11.68    0.59
  -1   5 -17   11.37    0.73
  -1   5 -17   12.09    0.70
  -1   5  17   11.91    0.73
   1   5 -17   12.12    0.70
   1   5 -17   12.33    0.59
   1   5 -17   12.05    0.75
  -1  -5 -17   12.13    0.54
  -1   5  17   12.03    0.71
   2  -5 -17    2.83    0.22
  -2   5 -17    3.23    0.41
   2   5  17    3.45    0.46
   2   5  17    2.70    0.40
  -2   5 -17    2.01    0.38
  -2   5 -17    2.93    0.33
  -2   5  17    3.80    0.45
  -2   5  17    2.41    0.37
  -2  -5 -17    2.76    0.28
   2   5 -17    2.51    0.45
   2   5 -17    2.63    0.38
   2   5 -17    2.67    0.28
  -3   5 -17    0.57    0.26
  -3   5 -17    0.42    0.28
   3   5  17    0.73    0.27
  -3   5 -17    0.32    0.28
   3   5  17    0.75    0.35
   3  -5 -17    0.81    0.15
   3   5 -17    0.62    0.19
  -3   5  17    0.56    0.32
   3   5 -17    1.03    0.29
  -3   5  17    0.37    0.25
  -3  -5 -17    0.38    0.18
   3   5 -17    0.51    0.28
  -4   5 -17    1.77    0.38
   4  -5 -17    2.03    0.18
   4   5  17    1.75    0.33
   4   5  17    1.55    0.40
  -4   5 -17    1.95    0.39
   4   5 -17    1.06    0.32
  -4   5  17    1.73    0.38
   4   5 -17    1.80    0.40
  -4  -5 -17    1.67    0.28
   0   5 -18    0.14    0.27
   0   5 -18    0.07    0.20
   0   5 -18   -0.69    0.23
   0   5  18    0.11    0.28
   0  -5 -18   -0.12    0.15
   0   5  18   -0.11    0.23
  -1   5 -18    7.42    0.59
  -1   5 -18    5.72    0.44
   1   5  18    7.01    0.61
   1   5  18    6.81    0.57
   1  -5 -18    6.07    0.35
  -1   5 -18    6.73    0.54
  -1  -5 -18    5.67    0.37
   1   5 -18    6.27    0.60
   1   5 -18    6.97    0.54
   1   5 -18    5.45    0.41
  -1   5  18    5.97    0.55
  -1   5  18    6.59    0.60
  -2   5 -18    2.66    0.33
  -2   5 -18    1.53    0.35
   2   5  18    2.26    0.42
  -2   5 -18    2.10    0.41
   2  -5 -18    2.08    0.22
   2   5 -18    1.85    0.39
  -2   5  18    2.19    0.38
  -2   5  18    2.88    0.43
   3   5  18    0.64    0.30
  -3   5 -18    0.42    0.32
   3  -5 -18    0.41    0.15
  -3   5 -18    0.67    0.26
  -3   5  18    0.47    0.28
   3   5 -18    0.44    0.30
   0  -6   0    5.04    0.27
   0   6   0    5.44    0.27
   0   6   0    5.47    0.31
   0   6   0    5.17    0.27
   0   6   0    5.92    0.29
  -1  -6   0    0.34    0.10
   1   6   0    0.53    0.13
  -1   6   0    0.33    0.10
  -1   6   0    0.26    0.10
  -1   6   0    0.15    0.10
   1  -6   0    0.38    0.11
   1   6   0    0.32    0.09
   1   6   0    0.38    0.11
   1   6   0    0.25    0.09
  -1   6   0    0.28    0.11
   2  -6   0   22.45    0.76
  -2   6   0   23.09    0.79
   2   6   0   22.03    0.82
  -2  -6   0   21.73    0.75
   2   6   0   22.98    0.74
   2   6   0   24.03    0.76
  -2   6   0   22.59    0.77
  -2   6   0   22.34    0.77
   2   6   0   22.84    0.77
  -3  -6   0    0.11    0.10
   3   6   0    0.15    0.11
  -3   6   0    0.15    0.10
   3   6   0    0.19    0.10
   3   6   0    0.18    0.08
  -3   6   0    0.44    0.11
   3   6   0    0.06    0.10
   4   6   0  159.02    4.25
   4   6   0  160.04    4.23
   4  -6   0  157.13    4.37
  -4   6   0  153.41    4.33
   4   6   0  153.27    4.46
   4  -6   0  153.97    4.24
  -5   6   0   16.86    0.70
   5  -6   0   16.71    0.72
   5   6   0   17.76    0.67
   5   6   0   15.79    0.69
   5   6   0   16.39    0.63
   5  -6   0   16.24    0.65
   6   6   0   14.20    0.61
   6  -6   0   13.64    0.68
   6  -6   0   14.11    0.62
   6   6   0   14.56    0.65
  -6   6   0   14.56    0.66
   6   6   0   14.25    0.60
   7   6   0    5.77    0.38
   7   6   0    5.34    0.38
   7   6   0    5.04    0.37
  -7  -6   0    5.34    0.39
   7  -6   0    5.07    0.38
   7  -6   0    5.30    0.42
  -7   6   0    5.24    0.41
   8  -6   0    0.84    0.26
  -8   6   0    0.75    0.24
   8   6   0    0.64    0.22
   8  -6   0    0.30    0.20
   9   6   0    0.64    0.25
   9  -6   0    0.61    0.23
   9  -6   0    0.53    0.27
  -9   6   0    0.55    0.25
 -10   6   0   11.36    0.73
  10  -6   0   11.82    0.77
  10  -6   0   11.10    0.66
   0   6  -1    4.81    0.26
   0  -6   1    4.53    0.26
   0   6  -1    4.19    0.25
   0   6   1    4.24    0.27
   0   6  -1    4.36    0.28
   0   6  -1    3.95    0.24
   0   6   1    4.55    0.27
   0  -6  -1    4.16    0.25
   0   6   1    4.44    0.24
   0   6   1    4.22    0.23
   1  -6  -1   42.90    1.36
  -1   6  -1   48.25    1.45
   1   6   1   47.53    1.47
   1   6   1   48.45    1.36
   1   6   1   45.67    1.41
  -1   6  -1   48.69    1.39
   1   6   1   45.62    1.34
  -1   6  -1   46.45    1.40
  -1   6  -1   45.99    1.36
  -1  -6   1   47.77    1.38
  -1   6   1   48.92    1.48
  -1  -6  -1   48.12    1.40
   1   6  -1   49.02    1.41
   1   6  -1   48.92    1.40
   1  -6   1   47.07    1.41
   1   6  -1   47.01    1.39
   1   6  -1   46.90    1.50
  -1   6   1   47.47    1.45
  -1   6   1   47.82    1.40
  -1   6   1   46.80    1.37
  -2  -6   1   21.53    0.71
  -2   6  -1   21.05    0.73
   2  -6  -1   19.66    0.69
   2   6   1   20.62    0.66
   2   6   1   21.08    0.73
  -2   6  -1   20.76    0.72
   2   6   1   20.05    0.77
  -2   6  -1   20.28    0.72
   2  -6   1   18.52    0.67
   2   6  -1   18.52    0.65
  -2   6   1   19.26    0.68
  -2   6   1   18.07    0.69
  -2   6   1   18.96    0.67
   2   6  -1   18.78    0.73
  -2  -6  -1   19.94    0.67
   2   6  -1   20.40    0.67
   2   6  -1   19.61    0.66
   3   6   1    8.95    0.36
   3   6   1    8.88    0.42
   3  -6  -1    7.87    0.38
   3   6   1    9.09    0.39
  -3  -6   1    8.71    0.40
  -3   6  -1    8.28    0.42
  -3   6  -1    9.23    0.38
   3   6   1    8.52    0.44
   3  -6   1    8.85    0.43
  -3   6   1    8.55    0.41
   3   6  -1    9.00    0.45
  -3   6   1    8.26    0.42
   3  -6   1    9.02    0.41
   3   6  -1    7.94    0.37
  -3   6   1    8.86    0.37
   3   6  -1    8.09    0.37
  -3  -6  -1    8.73    0.39
   3   6  -1    8.52    0.38
   4   6   1    4.42    0.30
   4   6   1    3.93    0.27
   4  -6  -1    3.71    0.26
   4   6   1    4.28    0.30
  -4   6  -1    3.91    0.29
   4   6   1    4.36    0.25
   4  -6  -1    3.50    0.30
   4  -6   1    4.14    0.28
  -4   6   1    3.50    0.28
   4   6  -1    4.36    0.27
   4   6  -1    4.18    0.27
   4   6  -1    3.89    0.30
   4   6  -1    3.94    0.26
   4  -6   1    4.28    0.32
  -5   6  -1    3.81    0.32
   5   6   1    3.96    0.26
   5   6   1    3.69    0.30
   5   6   1    3.58    0.29
   5   6   1    3.65    0.27
   5  -6  -1    3.38    0.27
   5  -6  -1    3.51    0.32
   5   6  -1    3.63    0.27
   5  -6   1    3.35    0.29
  -5   6   1    3.45    0.30
   5   6  -1    3.40    0.26
   5   6  -1    3.30    0.25
   5  -6   1    3.59    0.32
   5   6  -1    3.51    0.30
   6  -6  -1    5.51    0.35
   6   6   1    5.45    0.37
   6   6   1    5.73    0.36
  -6   6  -1    5.76    0.40
   6  -6  -1    6.61    0.43
   6   6   1    5.85    0.38
   6   6  -1    5.50    0.36
   6  -6   1    5.35    0.40
   6  -6   1    5.35    0.38
   6   6  -1    6.00    0.37
  -6   6   1    6.15    0.40
   6   6  -1    6.00    0.36
   6   6  -1    6.05    0.39
  -6  -6  -1    5.61    0.36
   7  -6  -1   10.56    0.62
   7  -6  -1   10.27    0.52
  -7  -6   1   10.56    0.56
   7   6   1   11.15    0.55
  -7   6  -1   10.28    0.58
   7   6   1   10.29    0.54
   7  -6   1    9.71    0.54
   7   6  -1   10.48    0.52
   7   6  -1   12.08    0.57
  -7   6   1   10.28    0.58
   7   6  -1   10.69    0.54
   7  -6   1   10.02    0.60
   8   6   1    8.13    0.50
   8  -6  -1    6.92    0.53
  -8   6  -1    7.60    0.52
   8  -6  -1    8.44    0.49
  -8  -6   1    7.23    0.50
  -8   6   1    7.64    0.52
   8  -6   1    6.62    0.52
   8  -6   1    6.94    0.47
   8   6  -1    7.50    0.48
   8   6  -1    6.76    0.44
   9  -6  -1    2.54    0.39
  -9   6  -1    2.74    0.39
   9   6   1    2.49    0.35
   9  -6  -1    2.25    0.32
   9  -6   1    2.69    0.38
   9  -6   1    1.89    0.35
  -9   6   1    2.38    0.36
  10   6   1    0.39    0.29
  10  -6  -1    0.12    0.26
 -10   6  -1    0.31    0.25
  10  -6  -1    0.42    0.29
  10  -6   1    0.17    0.29
  10  -6   1    0.36    0.29
 -10   6   1    0.15    0.28
   0   6   2   53.72    1.61
   0   6  -2   56.84    1.54
   0   6  -2   51.75    1.54
   0   6  -2   53.63    1.58
   0   6  -2   54.06    1.65
   0   6   2   53.03    1.51
   0  -6  -2   52.89    1.53
   0   6   2   50.11    1.51
   0  -6   2   53.28    1.55
   0   6   2   54.53    1.64
  -1   6  -2   76.72    2.29
  -1   6  -2   81.38    2.18
  -1  -6   2   76.08    2.18
   1   6   2   79.18    2.16
  -1   6  -2   82.29    2.19
   1  -6  -2   75.19    2.16
   1   6   2   73.50    2.24
   1   6   2   77.43    2.13
   1   6   2   79.00    2.32
  -1   6  -2   77.41    2.22
   1   6  -2   82.20    2.20
  -1   6   2   76.59    2.30
  -1   6   2   81.58    2.29
   1   6  -2   79.89    2.19
  -1  -6  -2   77.38    2.19
  -1   6   2   77.29    2.19
   1  -6   2   79.15    2.21
   1   6  -2   78.27    2.23
   1   6  -2   75.68    2.34
   2   6   2   10.40    0.41
   2  -6  -2    9.65    0.40
  -2   6  -2    9.65    0.42
   2   6   2    9.81    0.37
   2   6   2    9.45    0.45
   2   6   2    9.13    0.46
  -2  -6   2   10.22    0.42
  -2   6  -2   10.36    0.42
  -2   6  -2    9.69    0.45
  -2   6   2   10.32    0.42
  -2  -6  -2    9.78    0.42
  -2   6   2    9.44    0.42
   2  -6   2    9.92    0.43
   2   6  -2   10.41    0.40
   2   6  -2    9.47    0.47
   2   6  -2   10.52    0.43
   2  -6   2   10.30    0.43
   2   6  -2   10.05    0.42
  -2   6   2    9.70    0.46
  -3   6  -2    5.23    0.28
   3   6   2    4.98    0.25
  -3   6  -2    4.31    0.30
   3   6   2    4.65    0.30
   3  -6  -2    4.76    0.28
   3   6   2    5.01    0.32
   3   6   2    5.16    0.28
   3   6  -2    4.49    0.28
   3  -6   2    4.31    0.29
  -3   6   2    5.00    0.26
   3  -6   2    4.52    0.29
  -3  -6  -2    4.65    0.28
   3   6  -2    4.06    0.30
  -3   6   2    4.33    0.30
   3   6  -2    4.68    0.27
   3   6  -2    4.60    0.26
  -3   6   2    4.40    0.28
  -4   6  -2    3.54    0.29
   4   6   2    4.01    0.23
   4   6   2    4.23    0.27
   4   6   2    3.62    0.29
   4   6   2    3.58    0.28
   4  -6  -2    3.57    0.26
  -4   6  -2    3.75    0.23
   4  -6  -2    3.86    0.31
   4  -6   2    3.64    0.28
  -4   6   2    3.49    0.27
   4   6  -2    3.80    0.26
   4   6  -2    3.32    0.28
   4   6  -2    3.67    0.24
   4   6  -2    3.48    0.25
  -4  -6  -2    3.15    0.24
   4  -6   2    3.40    0.27
   5  -6  -2    5.12    0.32
  -5   6  -2    5.16    0.37
   5  -6  -2    5.59    0.39
   5   6   2    5.80    0.30
   5   6   2    5.60    0.36
   5   6   2    5.57    0.36
   5   6  -2    5.71    0.32
   5  -6   2    4.94    0.37
  -5   6   2    5.55    0.36
   5   6  -2    5.78    0.38
   5   6  -2    6.39    0.35
   5  -6   2    5.27    0.35
   5   6  -2    4.62    0.32
   6   6   2    7.72    0.45
   6  -6  -2    7.69    0.50
   6  -6  -2    7.83    0.42
   6   6   2    8.05    0.45
  -6   6  -2    8.87    0.50
   6  -6   2    9.14    0.49
   6   6  -2    8.68    0.44
   6   6  -2    8.22    0.45
   6  -6   2    9.12    0.51
  -6   6   2    8.92    0.49
   6   6  -2    8.74    0.49
   6   6  -2    8.55    0.44
   7  -6  -2    2.57    0.29
  -7  -6   2    3.33    0.34
  -7   6  -2    2.98    0.34
   7   6   2    3.48    0.32
   7   6   2    3.26    0.32
   7  -6  -2    3.58    0.38
  -7   6   2    3.36    0.35
   7   6  -2    3.52    0.33
   7  -6   2    3.19    0.35
   7   6  -2    3.55    0.32
   7  -6   2    3.08    0.32
   8  -6  -2   10.88    0.66
   8  -6  -2   10.23    0.54
  -8   6  -2   11.04    0.64
  -8  -6   2   10.85    0.62
   8   6   2   11.22    0.62
   8  -6   2   11.89    0.62
   8   6  -2   11.26    0.58
   8  -6   2   11.15    0.65
  -8   6   2   11.03    0.64
   9  -6  -2    1.86    0.30
   9   6   2    2.18    0.36
  -9  -6   2    2.11    0.36
  -9   6  -2    2.48    0.37
   9  -6  -2    2.17    0.37
   9   6  -2    2.22    0.29
   9  -6   2    2.79    0.36
   9  -6   2    2.03    0.36
  -9   6   2    2.63    0.38
  10  -6  -2    2.83    0.37
 -10   6  -2    1.89    0.37
  10   6   2    3.37    0.42
  10  -6  -2    1.58    0.40
 -10   6   2    2.44    0.41
  10  -6   2    2.76    0.46
  10  -6   2    2.57    0.38
   0   6   3   14.20    0.57
   0   6   3   14.91    0.48
   0  -6  -3   13.80    0.51
   0   6  -3   13.60    0.52
   0  -6   3   15.05    0.55
   0   6  -3   14.12    0.48
   0   6  -3   14.43    0.58
   0   6   3   14.09    0.58
   0   6  -3   14.13    0.55
   1  -6  -3   59.03    1.68
  -1   6  -3   61.76    1.71
  -1  -6   3   61.62    1.71
   1   6   3   58.23    1.63
   1   6   3   58.13    1.81
  -1   6  -3   55.69    1.75
   1   6   3   58.12    1.77
  -1   6  -3   61.00    1.80
   1   6  -3   59.94    1.77
  -1   6   3   61.81    1.71
  -1   6   3   59.80    1.81
   1   6  -3   58.81    1.85
  -1   6   3   61.55    1.82
   1   6  -3   60.94    1.69
  -1  -6  -3   59.40    1.72
   1   6  -3   59.98    1.72
   2   6   3   10.72    0.49
  -2   6  -3   11.30    0.45
   2   6   3   11.06    0.38
  -2   6  -3   10.72    0.49
  -2   6  -3   11.48    0.47
   2   6   3   10.83    0.50
   2  -6  -3   10.63    0.43
   2   6  -3   11.03    0.52
  -2   6   3   11.03    0.51
  -2   6   3   10.99    0.46
   2  -6   3   11.79    0.46
   2   6  -3   11.10    0.47
   2  -6   3   10.73    0.47
  -2  -6  -3   10.96    0.45
   2   6  -3   11.68    0.41
  -2   6   3   11.66    0.45
  -3   6  -3   26.70    0.86
  -3   6  -3   24.35    0.90
   3   6   3   25.17    0.90
   3  -6  -3   24.67    0.82
   3   6   3   25.78    0.93
   3   6  -3   24.91    0.88
   3   6  -3   24.86    0.82
  -3   6   3   25.12    0.93
  -3   6   3   27.83    0.87
   3   6  -3   26.20    0.95
   3  -6   3   25.20    0.88
   3   6  -3   26.90    0.86
  -3   6   3   26.36    0.88
   3  -6   3   25.63    0.88
  -3  -6  -3   27.37    0.87
   4  -6  -3    6.53    0.34
  -4   6  -3    6.36    0.38
   4   6   3    7.35    0.41
  -4   6  -3    6.77    0.32
   4   6   3    6.46    0.39
   4   6  -3    6.59    0.35
   4  -6   3    7.51    0.40
   4   6  -3    7.74    0.39
   4  -6   3    7.54    0.40
  -4   6   3    6.95    0.33
  -4   6   3    7.17    0.38
  -4   6   3    7.15    0.42
  -4  -6  -3    6.87    0.36
   4   6  -3    6.57    0.40
   4   6  -3    7.01    0.33
   5  -6  -3    1.90    0.20
  -5   6  -3    1.80    0.24
   5   6   3    1.95    0.23
   5   6   3    1.68    0.23
   5  -6  -3    1.62    0.25
   5   6  -3    1.82    0.21
   5   6  -3    1.80    0.25
   5  -6   3    2.14    0.25
  -5   6   3    1.70    0.22
   5   6  -3    1.54    0.19
   5  -6   3    1.35    0.21
   6  -6  -3    1.15    0.24
   6   6   3    0.84    0.20
  -6   6  -3    1.28    0.25
   6  -6  -3    1.24    0.18
   6   6   3    1.47    0.23
   6  -6   3    1.27    0.22
   6   6  -3    0.84    0.21
  -6   6   3    1.12    0.22
   6   6  -3    1.20    0.21
   6   6  -3    1.19    0.19
   6  -6   3    1.06    0.22
   7   6   3    5.24    0.38
   7   6   3    4.70    0.39
  -7   6  -3    5.16    0.41
   7  -6  -3    5.05    0.35
   7  -6  -3    4.78    0.44
   7   6  -3    5.73    0.41
  -7   6   3    5.26    0.42
   7  -6   3    5.09    0.44
   7   6  -3    5.50    0.37
   7  -6   3    4.93    0.40
   8  -6  -3   15.26    0.68
   8   6   3   15.55    0.75
  -8  -6   3   16.40    0.80
  -8   6  -3   14.32    0.76
   8  -6  -3   16.41    0.83
   8   6  -3   17.05    0.73
   8  -6   3   17.43    0.84
  -8   6   3   16.46    0.81
   8  -6   3   16.37    0.77
  -9  -6   3    2.60    0.38
   9  -6  -3    1.83    0.35
   9   6   3    2.55    0.35
  -9   6  -3    1.95    0.34
   9  -6  -3    1.63    0.28
   9  -6   3    3.03    0.41
   9   6  -3    2.04    0.31
  -9   6   3    2.39    0.34
  10  -6  -3    1.65    0.32
 -10  -6   3    1.85    0.41
  10  -6  -3    1.66    0.39
 -10   6  -3    1.27    0.37
  10   6   3    2.03    0.37
  10  -6   3    2.23    0.40
  10   6  -3    2.23    0.37
 -10   6   3    1.72    0.37
   0   6  -4   48.00    1.45
   0   6   4   47.28    1.53
   0  -6  -4   47.25    1.42
   0   6  -4   50.35    1.39
   0  -6   4   51.97    1.47
   0   6  -4   49.96    1.56
   0   6  -4   48.56    1.50
   0   6   4   52.07    1.39
   0   6   4   49.07    1.54
  -1   6  -4    9.45    0.44
   1   6   4    9.55    0.32
   1  -6  -4    9.19    0.38
  -1   6  -4    9.26    0.44
  -1   6  -4   10.19    0.42
   1   6   4    9.42    0.45
   1   6   4    9.36    0.46
   1   6  -4    9.91    0.47
  -1   6   4    9.80    0.46
  -1  -6  -4    9.31    0.39
   1  -6   4    9.21    0.37
   1   6  -4    9.49    0.41
   1   6  -4    9.05    0.43
  -1   6   4    9.74    0.44
  -1   6   4   10.27    0.37
   2   6   4    6.09    0.35
  -2   6  -4    5.89    0.34
  -2   6  -4    5.88    0.32
   2   6   4    5.86    0.36
  -2   6  -4    6.04    0.32
   2  -6  -4    5.91    0.29
   2   6  -4    5.52    0.35
   2  -6   4    6.09    0.33
   2  -6   4    5.90    0.30
  -2   6   4    6.23    0.30
  -2   6   4    6.46    0.33
   2   6  -4    6.22    0.31
  -2   6   4    5.04    0.34
  -2  -6  -4    6.42    0.32
   2   6  -4    6.08    0.34
  -3   6  -4   39.09    1.19
   3   6   4   37.07    1.24
  -3   6  -4   37.20    1.23
   3   6   4   35.83    1.24
   3  -6  -4   36.23    1.12
   3   6  -4   38.70    1.17
   3  -6   4   35.41    1.20
  -3   6   4   36.53    1.26
   3   6  -4   35.06    1.27
  -3  -6  -4   38.09    1.18
  -3   6   4   40.46    1.20
  -3   6   4   39.03    1.19
   3  -6   4   39.17    1.20
   3   6  -4   37.75    1.21
   4   6   4   27.19    0.99
  -4   6  -4   27.81    0.90
   4   6   4   27.61    0.99
  -4   6  -4   25.65    0.98
   4  -6  -4   26.79    0.88
   4   6  -4   27.08    0.91
   4   6  -4   27.50    1.02
  -4   6   4   28.36    0.96
  -4   6   4   26.09    1.01
   4   6  -4   25.98    0.95
   4  -6   4   28.31    0.97
   4  -6   4   28.00    0.97
  -4   6   4   29.25    0.91
  -4  -6  -4   28.36    0.93
   5   6   4   17.63    0.74
  -5   6  -4   17.41    0.76
   5  -6  -4   17.74    0.66
   5   6   4   18.46    0.74
   5  -6  -4   17.47    0.78
   5  -6   4   18.23    0.75
   5  -6   4   18.83    0.75
  -5   6   4   17.76    0.74
   5   6  -4   19.13    0.71
   5   6  -4   19.29    0.80
   5   6  -4   19.35    0.75
  -6   6  -4    9.28    0.53
   6   6   4    9.28    0.51
   6  -6  -4    8.45    0.53
   6   6   4    8.80    0.49
   6  -6  -4    8.73    0.43
   6   6  -4   10.00    0.48
   6  -6   4   10.40    0.55
   6   6  -4   10.34    0.53
   6  -6   4   10.34    0.53
  -6   6   4    9.29    0.52
   6   6  -4    9.60    0.54
  -7   6  -4    0.24    0.16
   7  -6  -4    0.25    0.20
   7   6   4   -0.05    0.16
   7   6   4   -0.07    0.16
   7  -6  -4    0.09    0.15
   7  -6   4    0.19    0.19
   7   6  -4   -0.05    0.14
   7   6  -4   -0.02    0.17
  -7   6   4    0.12    0.17
   7  -6   4   -0.18    0.16
   7   6  -4    0.03    0.16
   8  -6  -4   20.21    0.95
   8   6   4   19.71    0.89
   8  -6  -4   20.10    0.79
  -8   6  -4   18.43    0.89
   8   6  -4   21.23    0.84
   8  -6   4   21.07    0.95
  -8   6   4   20.31    0.92
   9  -6  -4    3.22    0.44
  -9   6  -4    3.36    0.41
  -9  -6   4    4.04    0.46
   9  -6  -4    2.95    0.33
   9   6   4    3.37    0.39
   9  -6   4    3.32    0.45
  -9   6   4    3.81    0.43
   9   6  -4    3.49    0.36
  10  -6  -4    3.64    0.38
 -10  -6   4    5.01    0.55
 -10   6  -4    4.43    0.51
  10   6   4    5.61    0.53
  10  -6  -4    5.25    0.56
  10   6  -4    5.20    0.46
  10  -6   4    4.46    0.53
 -10   6   4    6.41    0.57
   0   6  -5    9.37    0.45
   0   6  -5    9.45    0.42
   0   6   5   10.05    0.46
   0   6   5    9.27    0.47
   0   6  -5    9.73    0.46
   0  -6  -5    9.88    0.39
   1   6   5   42.62    1.42
  -1   6  -5   46.48    1.34
  -1   6  -5   45.39    1.41
   1  -6  -5   42.42    1.28
  -1   6  -5   44.00    1.39
   1   6   5   43.18    1.41
  -1   6   5   48.73    1.30
  -1   6   5   44.54    1.43
   1   6  -5   44.14    1.40
   1  -6   5   47.14    1.30
   1  -6   5   46.54    1.37
  -1  -6  -5   44.37    1.33
   1   6  -5   45.19    1.35
  -1   6   5   40.64    1.43
   1   6  -5   45.43    1.47
  -2   6  -5    4.30    0.28
  -2   6  -5    4.06    0.27
  -2   6  -5    4.36    0.30
   2   6   5    3.78    0.29
   2   6   5    4.26    0.31
   2  -6  -5    4.46    0.24
   2   6  -5    4.97    0.34
   2   6  -5    4.99    0.28
  -2   6   5    5.27    0.27
   2   6  -5    4.09    0.29
   2  -6   5    5.33    0.28
  -2   6   5    5.70    0.31
  -2   6   5    4.79    0.33
   2  -6   5    4.98    0.31
  -2  -6  -5    4.30    0.27
   3  -6  -5   20.19    0.69
   3   6   5   19.95    0.80
  -3   6  -5   20.73    0.80
  -3   6  -5   21.55    0.76
  -3   6  -5   20.80    0.74
   3   6   5   20.38    0.80
   3   6  -5   21.84    0.81
   3  -6   5   22.45    0.80
   3  -6   5   22.31    0.77
  -3   6   5   21.54    0.77
  -3  -6  -5   22.25    0.76
   3   6  -5   20.42    0.84
   3   6  -5   22.41    0.75
  -3   6   5   20.45    0.84
  -3   6   5   22.44    0.76
  -4   6  -5   19.61    0.71
  -4   6  -5   18.97    0.78
   4   6   5   19.03    0.78
   4   6   5   18.26    0.77
   4  -6  -5   20.23    0.68
   4  -6   5   19.59    0.76
   4   6  -5   18.52    0.79
  -4   6   5   18.17    0.80
  -4   6   5   19.51    0.70
  -4   6   5   21.16    0.75
  -4  -6  -5   19.41    0.72
   4   6  -5   19.59    0.76
   4   6  -5   20.08    0.71
   4  -6   5   20.66    0.75
   5   6   5   26.96    1.02
   5   6   5   27.01    1.00
   5  -6  -5   26.14    1.04
   5  -6  -5   26.67    0.88
  -5   6  -5   26.89    1.02
   5  -6   5   27.36    1.01
   5   6  -5   28.49    1.02
   5  -6   5   28.28    1.01
   5   6  -5   27.31    0.94
  -5   6   5   27.63    0.99
   5   6  -5   27.81    1.05
   6  -6  -5   23.68    1.00
  -6   6  -5   23.66    0.96
   6   6   5   23.71    0.92
   6   6   5   23.11    0.95
   6  -6  -5   24.09    0.83
   6   6  -5   24.84    0.96
   6   6  -5   24.30    0.88
   6  -6   5   25.26    0.98
  -6   6   5   24.71    0.96
   6   6  -5   25.57    1.00
   7   6   5    0.41    0.17
   7   6   5    0.15    0.20
   7  -6  -5    0.50    0.22
  -7   6  -5    0.50    0.21
   7  -6  -5    0.38    0.16
   7   6  -5    0.94    0.19
   7   6  -5    0.77    0.21
   7   6  -5    0.37    0.19
  -7   6   5    0.55    0.23
   7  -6   5    0.77    0.23
   8  -6  -5    0.71    0.27
  -8   6  -5    0.69    0.26
   8   6   5    0.78    0.26
   8  -6  -5    0.72    0.21
   8   6  -5    0.89    0.25
   8  -6   5    0.66    0.26
   8   6  -5    0.67    0.22
  -8   6   5    0.46    0.23
   9  -6  -5    0.18    0.19
   9   6   5   -0.10    0.24
   9  -6  -5    0.18    0.27
  -9   6  -5   -0.28    0.22
  -9   6   5   -0.02    0.24
   9   6  -5    0.00    0.21
   9  -6   5   -0.44    0.23
   9   6  -5    0.04    0.21
  10   6   5    1.57    0.36
  10   6  -5    2.53    0.34
  10  -6   5    1.60    0.37
 -10   6   5    2.04    0.38
   0   6   6    0.11    0.11
   0   6  -6   -0.06    0.10
   0   6  -6    0.07    0.09
   0   6   6   -0.04    0.12
   0  -6  -6   -0.02    0.08
   0   6  -6   -0.02    0.10
  -1   6  -6   29.14    1.01
   1   6   6   27.93    1.01
  -1   6  -6   29.65    0.95
   1  -6  -6   28.48    0.89
   1   6   6   29.99    1.03
  -1   6  -6   27.80    1.00
  -1   6   6   25.68    0.99
   1   6  -6   29.03    1.02
   1   6  -6   30.12    0.93
  -1   6   6   26.77    0.97
  -1  -6  -6   28.27    0.90
   1   6  -6   29.50    0.98
  -2   6  -6    6.83    0.41
   2  -6  -6    7.43    0.33
   2   6   6    7.01    0.40
  -2   6  -6    7.30    0.37
   2   6   6    7.51    0.43
  -2   6  -6    8.32    0.41
  -2   6   6    6.93    0.41
   2   6  -6    7.41    0.42
  -2  -6  -6    7.04    0.35
  -2   6   6    7.38    0.33
   2   6  -6    6.98    0.39
  -2   6   6    7.25    0.38
   2   6  -6    7.79    0.36
   3   6   6   12.63    0.60
   3   6   6   13.53    0.63
  -3   6  -6   13.80    0.56
  -3   6  -6   14.01    0.63
   3  -6  -6   15.20    0.51
  -3   6  -6   14.09    0.58
  -3  -6  -6   14.71    0.57
   3  -6   6   15.05    0.57
   3   6  -6   14.50    0.62
  -3   6   6   14.84    0.59
   3   6  -6   14.43    0.66
   3   6  -6   14.45    0.56
  -3   6   6   15.06    0.57
  -3   6   6   14.55    0.66
   4  -6  -6   10.16    0.44
  -4   6  -6   10.49    0.55
  -4   6  -6   12.21    0.50
   4   6   6   10.64    0.53
   4   6   6   11.31    0.57
  -4   6   6   11.01    0.50
  -4   6   6   11.24    0.58
   4   6  -6   10.77    0.53
   4   6  -6   10.76    0.55
   4   6  -6   10.56    0.47
  -4   6   6   11.65    0.48
   4  -6   6   11.27    0.51
  -4  -6  -6   10.81    0.49
   5   6   6    5.19    0.36
   5   6   6    4.60    0.38
  -5   6  -6    5.20    0.39
   5  -6  -6    5.24    0.30
  -5   6   6    5.18    0.36
   5   6  -6    5.20    0.33
   5   6  -6    4.80    0.38
  -5  -6  -6    4.98    0.33
   5   6  -6    4.94    0.36
  -5   6   6    4.93    0.40
   5  -6   6    5.98    0.38
   6  -6  -6    1.83    0.20
   6  -6  -6    1.47    0.28
  -6   6  -6    1.12    0.24
   6   6   6    1.46    0.26
   6   6   6    2.08    0.26
   6   6  -6    1.46    0.26
   6   6  -6    1.42    0.20
   6  -6   6    1.63    0.26
   6   6  -6    1.17    0.23
  -6   6   6    0.87    0.21
   7  -6  -6   10.50    0.66
   7   6   6   12.19    0.66
  -7   6  -6   11.45    0.65
   7   6   6   10.69    0.58
   7  -6  -6   11.39    0.52
   7   6  -6   11.70    0.57
  -7   6   6   11.58    0.63
   7   6  -6   11.89    0.63
   7   6  -6   12.77    0.65
   7  -6   6   12.40    0.65
   8  -6  -6    0.64    0.28
  -8   6  -6    0.06    0.21
   8  -6  -6    0.42    0.17
   8   6   6    0.19    0.24
   8   6  -6    0.49    0.24
   8   6  -6    0.51    0.18
   8  -6   6    0.24    0.26
  -8   6   6    0.28    0.25
   9  -6  -6    8.63    0.66
   9   6   6    8.43    0.60
   9  -6  -6    7.65    0.47
  -9   6  -6    8.38    0.61
   9   6  -6    9.46    0.55
   9  -6   6    8.62    0.61
  -9   6   6    9.61    0.65
   9   6  -6    8.10    0.60
  10  -6   6    1.53    0.41
  10   6  -6    1.57    0.38
  10   6  -6    1.60    0.34
   0   6  -7    8.06    0.43
   0   6   7    7.77    0.42
   0   6  -7    7.52    0.41
   0   6  -7    8.07    0.38
   0   6   7    7.19    0.43
   0  -6  -7    7.93    0.35
   1   6   7   15.18    0.69
  -1   6  -7   17.13    0.69
  -1   6  -7   17.02    0.70
   1   6   7   18.56    0.72
   1  -6  -7   17.35    0.59
  -1   6  -7   17.27    0.64
  -1  -6  -7   18.10    0.62
   1   6  -7   17.92    0.73
  -1   6   7   16.12    0.72
   1   6  -7   17.24    0.63
  -1   6   7   16.99    0.69
   1   6  -7   17.29    0.69
  -2   6  -7    6.73    0.38
   2   6   7    6.47    0.39
  -2   6  -7    6.70    0.40
   2  -6  -7    6.77    0.30
   2   6   7    6.58    0.42
  -2   6  -7    6.46    0.36
   2   6  -7    6.64    0.40
  -2   6   7    5.82    0.40
  -2  -6  -7    6.38    0.33
   2   6  -7    5.97    0.32
   2   6  -7    5.89    0.37
  -2   6   7    6.56    0.36
  -3   6  -7    8.85    0.45
  -3   6  -7    9.75    0.51
   3  -6  -7    8.97    0.37
   3   6   7    8.95    0.48
  -3   6  -7   10.00    0.46
   3   6   7    9.24    0.51
  -3   6   7   10.34    0.47
  -3   6   7   10.46    0.44
   3   6  -7   10.36    0.44
   3   6  -7    9.54    0.52
  -3  -6  -7    9.93    0.45
   3   6  -7    9.39    0.49
  -3   6   7    9.59    0.53
  -4   6  -7   30.31    1.11
   4   6   7   29.15    1.10
   4  -6  -7   29.57    0.93
  -4   6  -7   30.95    1.03
   4   6   7   27.93    1.07
  -4  -6  -7   29.63    1.01
   4   6  -7   29.66    0.98
  -4   6   7   30.42    1.02
   4   6  -7   29.19    1.08
  -4   6   7   29.04    1.13
   4  -6   7   30.71    1.02
   4   6  -7   28.87    1.12
  -4   6   7   33.21    1.04
   5  -6  -7    8.44    0.38
   5   6   7    7.52    0.46
   5   6   7    8.94    0.53
  -5   6  -7    8.86    0.52
   5   6  -7    7.86    0.48
   5   6  -7    8.48    0.42
   5  -6   7    8.69    0.47
  -5  -6  -7    8.51    0.45
  -5   6   7    7.47    0.49
  -5   6   7    8.94    0.47
   5   6  -7    8.19    0.50
   6  -6  -7    3.75    0.40
   6   6   7    3.60    0.37
   6  -6  -7    4.35    0.28
   6   6   7    4.19    0.35
  -6   6  -7    4.37    0.40
   6   6  -7    4.71    0.40
   6   6  -7    5.21    0.43
   6  -6   7    4.46    0.38
   6   6  -7    4.51    0.33
  -6   6   7    4.84    0.39
   7  -6  -7    7.32    0.55
   7   6   7    8.26    0.54
   7   6   7    8.00    0.49
  -7   6  -7    7.60    0.52
   7  -6  -7    7.22    0.40
  -7   6   7    8.25    0.53
   7  -6   7    8.42    0.53
   7   6  -7    8.08    0.52
   7   6  -7    8.17    0.53
   7   6  -7    7.64    0.45
   8   6   7    0.32    0.25
  -8   6  -7   -0.28    0.20
   8  -6  -7    0.18    0.24
   8  -6  -7    0.07    0.14
   8   6  -7    0.25    0.23
  -8   6   7    0.21    0.24
   8  -6   7    0.37    0.23
   8   6  -7    0.26    0.20
   9   6   7    4.70    0.49
   9  -6  -7    4.13    0.35
  -9   6  -7    3.54    0.46
   9  -6  -7    4.36    0.51
   9   6  -7    5.98    0.53
  -9   6   7    5.24    0.53
   9  -6   7    4.50    0.49
   9   6  -7    5.30    0.43
   0   6  -8   26.41    0.95
   0   6   8   25.56    0.97
   0  -6  -8   24.83    0.82
   0   6  -8   25.95    0.96
   0   6   8   24.71    0.93
   0   6  -8   26.24    0.87
   1  -6  -8    0.46    0.10
   1   6   8    0.95    0.20
   1   6   8    0.55    0.14
  -1   6  -8    0.72    0.17
  -1   6  -8    0.81    0.15
  -1   6  -8    0.83    0.16
   1   6  -8    0.88    0.14
   1   6  -8    0.91    0.17
  -1  -6  -8    0.81    0.13
  -1   6   8    0.59    0.15
   1   6  -8    0.77    0.17
  -1   6   8    0.66    0.18
  -2   6  -8    7.31    0.41
   2  -6  -8    7.14    0.32
  -2   6  -8    7.57    0.44
  -2   6  -8    7.15    0.39
   2   6   8    6.71    0.41
   2   6   8    7.31    0.45
  -2  -6  -8    7.08    0.35
   2   6  -8    7.27    0.44
   2   6  -8    6.78    0.41
   2   6  -8    7.82    0.37
  -2   6   8    7.12    0.45
  -2   6   8    7.38    0.41
  -3   6  -8   44.76    1.37
  -3   6  -8   42.14    1.45
   3   6   8   40.99    1.44
  -3   6  -8   43.64    1.42
   3   6   8   43.64    1.48
   3  -6  -8   42.75    1.26
  -3  -6  -8   42.61    1.33
   3   6  -8   43.27    1.33
   3   6  -8   41.18    1.48
  -3   6   8   44.49    1.41
  -3   6   8   43.78    1.49
   3   6  -8   44.25    1.44
   4   6   8   11.22    0.56
   4   6   8   10.25    0.58
  -4   6  -8   10.67    0.51
   4  -6  -8   10.84    0.43
  -4   6  -8   10.59    0.57
  -4  -6  -8   12.22    0.53
   4   6  -8   11.58    0.58
   4   6  -8   11.88    0.50
   4   6  -8   12.03    0.62
  -4   6   8   11.68    0.53
  -4   6   8   12.58    0.64
   5   6   8   10.22    0.54
   5   6   8    9.59    0.57
   5  -6  -8   10.15    0.43
  -5   6  -8    9.95    0.57
   5   6  -8   11.28    0.50
   5   6  -8   10.00    0.58
   5   6  -8    9.81    0.56
  -5  -6  -8   10.77    0.52
  -5   6   8   10.79    0.54
  -5   6   8   11.57    0.63
   6   6   8    4.53    0.42
  -6   6  -8    4.91    0.42
   6   6   8    3.86    0.36
   6  -6  -8    3.86    0.27
   6  -6  -8    4.01    0.42
   6   6  -8    4.67    0.41
   6   6  -8    4.11    0.39
   6   6  -8    4.83    0.32
  -6   6   8    4.51    0.38
   7  -6  -8    8.04    0.58
   7   6   8    8.47    0.58
   7   6   8    8.38    0.52
   7  -6  -8    8.70    0.43
  -7   6  -8    9.09    0.58
  -7   6   8   10.91    0.61
   7   6  -8    8.37    0.56
   7  -6   8    9.76    0.57
   7   6  -8   10.25    0.51
   7   6  -8    9.30    0.58
   8  -6  -8    2.00    0.37
   8   6   8    2.43    0.37
   8  -6  -8    2.20    0.25
  -8   6  -8    1.71    0.32
   8  -6   8    2.38    0.33
  -8   6   8    2.15    0.34
   8   6  -8    1.87    0.33
   8   6  -8    2.39    0.28
  -9   6  -8    0.00    0.27
   9   6   8    0.54    0.29
   9  -6  -8   -0.15    0.17
   9  -6  -8    0.17    0.29
   9   6  -8    0.35    0.29
  -9   6   8    0.62    0.28
   9  -6   8    0.08    0.28
   9   6  -8    0.70    0.24
   0   6  -9   22.82    0.79
   0   6   9   22.16    0.86
   0   6  -9   21.85    0.86
   0   6   9   20.68    0.87
   0  -6  -9   22.24    0.73
   0   6  -9   21.16    0.87
   1   6   9   10.47    0.57
  -1   6  -9   10.87    0.55
  -1   6  -9   10.77    0.48
   1   6   9   10.35    0.53
   1  -6  -9   10.68    0.42
  -1   6  -9   11.06    0.54
  -1  -6  -9   11.37    0.45
  -1   6   9   11.13    0.53
   1   6  -9   10.85    0.56
   1   6  -9   10.73    0.53
   1   6  -9   10.70    0.47
  -1   6   9    9.94    0.56
  -2   6  -9   29.11    1.08
   2   6   9   28.93    1.07
   2   6   9   29.09    1.09
  -2   6  -9   28.00    0.99
   2  -6  -9   29.03    0.89
  -2   6  -9   29.14    1.05
  -2   6   9   29.51    1.12
   2   6  -9   29.80    1.11
  -2   6   9   28.94    1.04
   2   6  -9   29.76    0.97
   2   6  -9   28.51    1.05
  -2  -6  -9   29.81    0.96
   3   6   9   10.77    0.59
  -3   6  -9   10.33    0.56
   3   6   9   11.57    0.57
  -3   6  -9   11.05    0.51
  -3   6  -9   10.98    0.53
   3  -6  -9   10.62    0.41
  -3  -6  -9   11.55    0.50
  -3   6   9   10.74    0.59
   3   6  -9   10.95    0.56
  -3   6   9   12.15    0.54
   3   6  -9   10.78    0.47
   3   6  -9    9.69    0.57
   4   6   9   18.70    0.85
  -4   6  -9   20.45    0.86
  -4   6  -9   19.46    0.78
   4  -6  -9   20.37    0.67
   4   6   9   19.06    0.82
   4   6  -9   20.01    0.84
  -4   6   9   20.20    0.89
   4   6  -9   20.41    0.88
  -4   6   9   19.67    0.77
  -4  -6  -9   20.41    0.77
   5   6   9   11.73    0.65
   5  -6  -9   12.63    0.48
   5   6   9   11.07    0.60
  -5   6  -9   12.66    0.66
   5   6  -9   13.26    0.68
  -5  -6  -9   12.50    0.58
   5   6  -9   13.25    0.66
  -5   6   9   12.89    0.69
   5   6  -9   12.22    0.54
  -6   6  -9    4.72    0.43
   6  -6  -9    4.47    0.28
   6  -6  -9    4.39    0.44
   6   6   9    4.72    0.38
   6   6   9    4.85    0.45
   6   6  -9    4.99    0.44
  -6   6   9    4.07    0.38
   6   6  -9    5.21    0.44
   6   6  -9    4.68    0.32
   7  -6  -9    8.88    0.63
   7  -6  -9    9.37    0.44
   7   6   9    9.36    0.56
  -7   6  -9   10.09    0.62
   7   6   9    9.34    0.63
   7   6  -9   10.85    0.53
   7   6  -9   11.15    0.65
   7   6  -9   10.56    0.64
  -7   6   9   10.87    0.62
   8   6   9    1.54    0.34
   8  -6  -9    0.72    0.31
   8  -6  -9    0.99    0.21
  -8   6  -9    1.67    0.34
  -8   6   9    1.02    0.31
   8   6  -9    1.42    0.26
   8   6  -9    1.27    0.31
   9  -6  -9    3.36    0.49
  -9   6  -9    3.87    0.48
  -9   6   9    3.18    0.47
   9   6  -9    3.37    0.44
   9   6  -9    3.76    0.36
   0  -6 -10    1.26    0.16
   0   6 -10    0.95    0.20
   0   6  10    1.10    0.23
   0   6 -10    0.79    0.16
   0   6  10    1.01    0.20
   0   6 -10    0.72    0.20
   1  -6 -10   40.23    1.16
  -1   6 -10   38.99    1.36
   1   6  10   37.34    1.34
  -1   6 -10   38.90    1.35
   1   6  10   38.62    1.37
  -1   6 -10   38.30    1.25
   1   6 -10   36.03    1.34
   1   6 -10   37.96    1.20
  -1   6  10   38.01    1.35
  -1   6  10   37.91    1.30
  -1  -6 -10   37.98    1.16
   1   6 -10   38.04    1.31
  -2   6 -10    1.06    0.23
  -2   6 -10    1.61    0.21
  -2   6 -10    1.53    0.23
   2   6  10    1.25    0.22
   2   6  10    0.92    0.23
   2  -6 -10    1.30    0.15
   2   6 -10    1.28    0.24
  -2   6  10    1.47    0.23
   2   6 -10    1.29    0.22
  -2   6  10    1.24    0.24
  -2  -6 -10    1.15    0.17
   2   6 -10    1.25    0.18
   3   6  10    8.89    0.54
   3   6  10    8.27    0.50
   3  -6 -10    9.48    0.37
  -3   6 -10    9.27    0.50
  -3   6 -10    8.38    0.46
  -3   6 -10    8.83    0.52
   3   6 -10    9.63    0.53
   3   6 -10    9.02    0.43
   3   6 -10    9.18    0.55
  -3   6  10   10.52    0.52
  -3  -6 -10   10.10    0.46
  -3   6  10    8.86    0.55
   4   6  10    2.65    0.33
  -4   6 -10    3.15    0.34
   4   6  10    3.10    0.32
   4  -6 -10    2.83    0.21
  -4   6 -10    3.02    0.31
   4   6 -10    3.61    0.35
  -4   6  10    3.36    0.30
   4   6 -10    2.99    0.26
   4   6 -10    3.17    0.35
  -4   6  10    3.12    0.36
  -4  -6 -10    3.10    0.28
   5  -6 -10    1.37    0.16
   5   6  10    1.34    0.25
  -5   6 -10    1.44    0.27
   5   6  10    1.30    0.29
  -5  -6 -10    1.43    0.22
   5   6 -10    1.40    0.20
  -5   6  10    1.40    0.28
   5   6 -10    1.20    0.26
   5   6 -10    1.01    0.26
   6  -6 -10    0.26    0.14
   6  -6 -10    0.40    0.23
   6   6  10    0.13    0.19
   6   6  10    0.54    0.25
  -6   6 -10    0.45    0.22
   6   6 -10    0.03    0.20
   6   6 -10    0.03    0.22
   6   6 -10    0.11    0.16
   7  -6 -10   18.40    0.92
  -7   6 -10   17.06    0.87
   7   6  10   17.32    0.90
   7   6  10   18.04    0.85
   7  -6 -10   18.16    0.67
   7   6 -10   20.55    0.79
   7   6 -10   19.31    0.93
   7   6 -10   18.80    0.91
  -8   6 -10   -0.05    0.25
   8   6  10   -0.28    0.26
   8  -6 -10    0.07    0.18
   8  -6 -10   -0.04    0.25
   8   6 -10    0.40    0.19
   8   6 -10    0.49    0.28
   0   6  11   74.59    2.34
   0   6 -11   75.10    2.37
   0  -6 -11   71.97    2.09
   0   6  11   73.75    2.34
   0   6 -11   77.98    2.18
   0   6 -11   73.18    2.30
  -1   6 -11   12.10    0.62
   1  -6 -11   12.31    0.47
  -1   6 -11   12.71    0.56
  -1   6 -11   10.82    0.60
   1   6  11   11.73    0.60
   1   6  11   12.16    0.64
  -1  -6 -11   13.00    0.52
   1   6 -11   12.29    0.62
  -1   6  11   12.77    0.66
   1   6 -11   12.55    0.54
  -1   6  11   12.32    0.61
   1   6 -11   12.21    0.64
   2  -6 -11   23.00    0.73
   2   6  11   22.20    0.93
  -2   6 -11   21.48    0.91
  -2   6 -11   23.55    0.86
  -2   6 -11   22.39    0.93
   2   6  11   22.55    0.96
   2   6 -11   22.87    0.95
  -2   6  11   20.60    0.92
   2   6 -11   21.77    0.89
  -2  -6 -11   21.65    0.78
   2   6 -11   22.27    0.79
  -2   6  11   21.82    0.88
   3   6  11    8.56    0.52
   3  -6 -11    9.51    0.38
  -3   6 -11    9.23    0.55
  -3   6 -11    8.61    0.51
   3   6  11    9.17    0.57
  -3   6 -11    9.30    0.50
   3   6 -11   10.24    0.46
   3   6 -11    9.85    0.58
   3   6 -11    9.79    0.55
  -3   6  11    9.82    0.59
  -3   6  11    9.20    0.51
  -3  -6 -11    9.21    0.46
  -4   6 -11    2.73    0.34
   4   6  11    2.96    0.32
   4  -6 -11    3.06    0.22
  -4   6 -11    3.67    0.33
   4   6  11    2.86    0.35
   4   6 -11    2.36    0.31
   4   6 -11    2.97    0.35
  -4   6  11    2.96    0.37
   4   6 -11    3.29    0.27
  -4  -6 -11    3.60    0.30
   5   6  11    6.70    0.47
   5   6  11    8.07    0.56
  -5   6 -11    7.56    0.53
   5  -6 -11    7.95    0.36
  -5   6  11    8.66    0.59
   5   6 -11    8.51    0.44
   5   6 -11    9.45    0.58
   5   6 -11    7.70    0.52
  -5  -6 -11    9.04    0.49
   6  -6 -11    4.37    0.29
   6   6  11    5.05    0.44
   6  -6 -11    5.37    0.52
  -6   6 -11    5.73    0.50
   6   6  11    5.39    0.50
   6   6 -11    4.76    0.46
   6   6 -11    4.88    0.47
   6   6 -11    4.83    0.34
   7   6  11    4.41    0.49
   7  -6 -11    4.55    0.49
   7  -6 -11    3.90    0.28
  -7   6 -11    4.62    0.47
   7   6  11    4.16    0.43
   7   6 -11    4.67    0.36
   7   6 -11    3.96    0.46
   7   6 -11    4.51    0.47
   8   6  11    1.81    0.41
   8  -6 -11    1.65    0.23
  -8   6 -11    1.66    0.37
   8  -6 -11    1.64    0.41
   8   6 -11    1.43    0.25
   8   6 -11    1.44    0.35
   0  -6 -12   16.06    0.60
   0   6  12   16.15    0.78
   0   6 -12   16.84    0.77
   0   6 -12   17.08    0.67
   0   6  12   15.77    0.75
   0   6 -12   17.07    0.79
  -1   6 -12   19.19    0.84
   1  -6 -12   18.06    0.63
  -1   6 -12   18.15    0.73
   1   6  12   18.01    0.81
  -1   6 -12   19.76    0.84
   1   6  12   17.54    0.83
   1   6 -12   18.68    0.71
   1   6 -12   18.33    0.85
  -1  -6 -12   17.85    0.67
  -1   6  12   18.22    0.80
  -1   6  12   18.65    0.85
   1   6 -12   18.65    0.82
  -2   6 -12   10.21    0.57
   2  -6 -12    9.82    0.40
  -2   6 -12   10.27    0.52
   2   6  12    9.18    0.58
  -2   6 -12    9.97    0.58
   2   6  12    9.07    0.54
  -2   6  12   10.14    0.60
   2   6 -12    9.69    0.58
  -2   6  12   10.85    0.56
   2   6 -12   10.88    0.59
  -2  -6 -12    9.77    0.46
   2   6 -12    9.47    0.46
   3   6  12    9.80    0.60
  -3   6 -12   10.64    0.53
  -3   6 -12   10.09    0.59
   3  -6 -12    9.67    0.40
  -3   6 -12   10.91    0.58
   3   6  12    9.85    0.57
  -3   6  12   10.64    0.57
   3   6 -12   11.20    0.64
  -3  -6 -12   10.35    0.50
  -3   6  12   10.48    0.63
   3   6 -12   10.90    0.49
   3   6 -12   10.07    0.58
   4  -6 -12    0.55    0.13
  -4   6 -12    0.63    0.21
   4   6  12    0.18    0.21
   4   6  12    0.66    0.20
  -4   6 -12   -0.10    0.16
  -4  -6 -12    0.32    0.18
   4   6 -12    0.82    0.23
  -4   6  12    0.36    0.22
   4   6 -12    0.78    0.17
   4   6 -12    0.67    0.22
   5   6  12    3.03    0.41
   5  -6 -12    3.20    0.24
   5   6  12    3.46    0.38
  -5   6 -12    3.52    0.39
  -5  -6 -12    3.54    0.33
   5   6 -12    3.63    0.29
   5   6 -12    3.56    0.39
   5   6 -12    4.06    0.43
  -5   6  12    3.41    0.42
   6  -6 -12   12.91    0.76
  -6   6 -12   13.65    0.76
   6   6  12   13.29    0.71
   6   6  12   13.17    0.78
   6  -6 -12   13.16    0.51
   6   6 -12   14.88    0.78
   6   6 -12   13.24    0.61
   6   6 -12   13.98    0.78
   7  -6 -12    6.64    0.37
   7  -6 -12    8.11    0.63
   7   6  12    7.30    0.53
  -7   6 -12    7.58    0.59
   7   6  12    7.35    0.62
   7   6 -12    7.69    0.59
   7   6 -12    7.50    0.59
   7   6 -12    7.32    0.44
   0   6  13    3.94    0.40
   0   6 -13    4.66    0.41
   0   6 -13    4.40    0.41
   0  -6 -13    3.78    0.27
   0   6 -13    4.55    0.32
   0   6  13    4.94    0.45
  -1   6 -13    2.15    0.30
   1   6  13    2.83    0.35
   1  -6 -13    2.63    0.21
  -1   6 -13    2.28    0.32
   1   6  13    2.48    0.31
  -1   6 -13    3.37    0.30
  -1  -6 -13    2.61    0.23
   1   6 -13    2.20    0.23
   1   6 -13    2.49    0.30
  -1   6  13    2.06    0.33
   1   6 -13    2.01    0.32
  -1   6  13    2.17    0.28
   2   6  13    0.45    0.20
   2   6  13    0.76    0.26
   2  -6 -13    0.74    0.14
  -2   6 -13    0.57    0.20
  -2   6 -13    1.14    0.24
  -2   6 -13    0.89    0.22
  -2   6  13    0.68    0.24
   2   6 -13    0.86    0.18
   2   6 -13    0.64    0.22
  -2  -6 -13    0.65    0.15
  -2   6  13    0.43    0.19
   2   6 -13    1.04    0.26
  -3   6 -13    5.70    0.40
  -3   6 -13    5.72    0.48
   3  -6 -13    5.91    0.29
   3   6  13    5.55    0.50
   3   6  13    5.20    0.46
  -3   6 -13    5.52    0.44
  -3   6  13    5.51    0.42
   3   6 -13    5.32    0.34
   3   6 -13    5.40    0.43
  -3  -6 -13    4.90    0.34
   3   6 -13    5.05    0.48
  -3   6  13    5.56    0.48
  -4   6 -13    1.17    0.28
   4   6  13    1.14    0.29
   4  -6 -13    1.53    0.17
   4   6  13    0.73    0.23
  -4   6 -13    1.36    0.30
  -4  -6 -13    1.31    0.22
  -4   6  13    1.14    0.28
   4   6 -13    1.47    0.28
   4   6 -13    1.21    0.20
   4   6 -13    0.65    0.27
   5   6  13    3.68    0.45
  -5   6 -13    4.65    0.47
   5   6  13    4.42    0.45
   5  -6 -13    4.27    0.27
  -5  -6 -13    4.50    0.38
   5   6 -13    4.44    0.33
  -5   6  13    4.23    0.47
   5   6 -13    4.40    0.45
   5   6 -13    4.59    0.48
   6   6  13    7.33    0.61
   6  -6 -13    7.16    0.59
   6  -6 -13    5.63    0.31
  -6   6 -13    7.28    0.59
   6   6  13    5.43    0.50
   6   6 -13    6.33    0.55
   6   6 -13    6.68    0.60
   6   6 -13    6.38    0.41
  -7   6 -13    4.19    0.50
   7  -6 -13    3.23    0.26
   7   6  13    4.03    0.44
   7  -6 -13    4.34    0.50
   0   6  14    4.17    0.40
   0   6 -14    4.32    0.33
   0   6 -14    5.44    0.45
   0   6  14    4.97    0.46
   0  -6 -14    4.29    0.28
   0   6 -14    4.01    0.41
  -1   6 -14    1.70    0.29
   1  -6 -14    1.68    0.18
  -1   6 -14    1.71    0.24
   1   6  14    1.39    0.28
   1   6  14    1.45    0.30
  -1   6 -14    2.03    0.32
   1   6 -14    1.49    0.22
   1   6 -14    1.34    0.25
  -1   6  14    1.61    0.30
   1   6 -14    1.14    0.29
  -1   6  14    1.85    0.29
  -1  -6 -14    1.27    0.19
  -2   6 -14    2.47    0.29
   2   6  14    2.15    0.33
   2   6  14    2.62    0.37
  -2   6 -14    2.64    0.37
  -2   6 -14    3.04    0.37
   2  -6 -14    2.41    0.20
   2   6 -14    2.63    0.26
  -2   6  14    2.20    0.37
  -2   6  14    2.33    0.32
   2   6 -14    2.60    0.35
  -2  -6 -14    2.15    0.24
   2   6 -14    2.81    0.37
   3   6  14   26.63    1.15
   3  -6 -14   27.32    0.84
   3   6  14   25.15    1.10
  -3   6 -14   25.62    1.11
  -3   6 -14   26.72    1.12
  -3   6 -14   27.12    1.02
  -3   6  14   27.58    1.16
  -3  -6 -14   26.88    0.97
   3   6 -14   26.69    1.18
   3   6 -14   25.11    0.94
   3   6 -14   26.79    1.12
  -3   6  14   29.35    1.12
   4   6  14   -0.03    0.21
   4   6  14    0.18    0.27
   4  -6 -14    0.47    0.14
  -4   6 -14    0.00    0.22
  -4   6 -14   -0.12    0.21
   4   6 -14    0.16    0.24
   4   6 -14    0.26    0.16
  -4  -6 -14    0.02    0.17
   4   6 -14    0.15    0.22
  -4   6  14    0.13    0.23
  -5   6 -14   17.68    0.89
   5   6  14   15.57    0.83
   5   6  14   15.43    0.87
   5  -6 -14   17.70    0.60
   5   6 -14   16.69    0.68
  -5  -6 -14   17.52    0.77
   5   6 -14   16.69    0.86
   5   6 -14   15.22    0.87
  -5   6  14   16.57    0.89
   6   6  14    0.29    0.27
   6   6  14    0.10    0.23
   6  -6 -14   -0.02    0.27
  -6   6 -14    0.15    0.28
   6  -6 -14    0.27    0.14
   6   6 -14    0.26    0.18
   6   6 -14   -0.10    0.26
   6   6 -14    0.32    0.26
   0  -6 -15    0.98    0.17
   0   6  15    0.82    0.28
   0   6 -15    1.11    0.20
   0   6 -15    0.75    0.27
   0   6 -15    0.98    0.26
   0   6  15    0.56    0.24
   1  -6 -15    7.88    0.38
  -1   6 -15    8.12    0.56
   1   6  15    7.18    0.55
   1   6  15    8.07    0.55
  -1   6 -15    9.04    0.50
  -1   6 -15    7.77    0.55
  -1   6  15    8.21    0.59
   1   6 -15    7.26    0.56
  -1  -6 -15    8.42    0.42
   1   6 -15    8.18    0.56
   1   6 -15    7.75    0.45
  -1   6  15    8.75    0.56
  -2   6 -15    4.66    0.38
   2   6  15    3.42    0.44
   2  -6 -15    3.72    0.26
  -2   6 -15    4.07    0.43
  -2   6 -15    3.80    0.43
   2   6  15    3.83    0.42
  -2   6  15    4.01    0.41
   2   6 -15    3.43    0.31
  -2   6  15    3.64    0.43
  -2  -6 -15    3.46    0.30
   2   6 -15    4.44    0.47
   2   6 -15    3.87    0.42
   3   6  15    1.86    0.33
  -3   6 -15    2.24    0.35
  -3   6 -15    1.93    0.33
  -3   6 -15    2.27    0.32
   3  -6 -15    1.95    0.19
   3   6  15    1.62    0.33
  -3  -6 -15    2.40    0.28
   3   6 -15    1.91    0.31
  -3   6  15    2.41    0.35
   3   6 -15    2.35    0.38
  -3   6  15    1.93    0.37
   3   6 -15    2.01    0.26
   4  -6 -15   10.69    0.43
   4   6  15   10.01    0.64
  -4   6 -15   11.79    0.68
  -4   6 -15   10.69    0.68
   4   6  15   10.66    0.69
  -4   6  15   11.78    0.73
   4   6 -15   10.55    0.52
  -4  -6 -15   11.24    0.57
   4   6 -15   10.24    0.66
   5   6  15    4.22    0.49
   5   6  15    4.61    0.47
  -5   6 -15    4.59    0.53
   5  -6 -15    4.50    0.28
  -5   6  15    4.42    0.52
   5   6 -15    3.60    0.50
   5   6 -15    5.18    0.50
   5   6 -15    4.29    0.34
  -5  -6 -15    4.46    0.40
   6  -6 -15    0.19    0.34
  -6   6 -15    0.78    0.34
   6   6  15    0.63    0.30
   6  -6 -15    1.05    0.17
   6   6 -15    0.80    0.36
   0   6 -16    2.54    0.37
   0  -6 -16    2.60    0.25
   0   6 -16    2.24    0.36
   0   6  16    2.77    0.40
   0   6  16    2.42    0.35
   0   6 -16    2.52    0.30
  -1   6 -16    8.60    0.59
  -1   6 -16    9.18    0.53
   1   6  16    7.68    0.56
  -1   6 -16    7.96    0.61
   1   6  16    8.59    0.62
   1  -6 -16    8.92    0.42
   1   6 -16    8.24    0.61
   1   6 -16    8.62    0.57
  -1   6  16    8.87    0.59
  -1   6  16    8.32    0.60
  -1  -6 -16    8.82    0.45
   1   6 -16    9.12    0.50
   2  -6 -16    9.93    0.43
  -2   6 -16    9.12    0.53
  -2   6 -16    9.98    0.64
  -2   6 -16    9.69    0.65
   2   6  16    9.30    0.62
   2   6  16    8.90    0.65
   2   6 -16    9.11    0.62
  -2  -6 -16   10.31    0.50
  -2   6  16   10.43    0.68
   2   6 -16    8.80    0.65
  -2   6  16    9.17    0.61
   2   6 -16   10.22    0.52
   3   6  16    4.55    0.47
  -3   6 -16    4.61    0.48
   3  -6 -16    4.16    0.27
  -3   6 -16    3.91    0.46
   3   6  16    4.47    0.50
   3   6 -16    4.26    0.35
  -3  -6 -16    4.32    0.35
  -3   6  16    3.64    0.42
  -3   6  16    3.59    0.45
   3   6 -16    4.08    0.49
   3   6 -16    4.10    0.45
  -4   6 -16    1.57    0.35
   4   6  16    0.77    0.25
   4  -6 -16    0.81    0.16
  -4   6 -16    1.06    0.36
   4   6  16    0.98    0.34
   4   6 -16    0.30    0.32
  -4   6  16    0.51    0.31
   4   6 -16    0.84    0.20
  -4  -6 -16    0.37    0.23
   4   6 -16    0.91    0.30
  -5   6 -16    5.29    0.57
   5  -6 -16    5.19    0.30
  -5   6  16    5.63    0.56
  -5  -6 -16    4.68    0.43
   0   6 -17   14.41    0.80
   0   6  17   13.23    0.78
   0   6 -17   15.31    0.70
   0  -6 -17   14.20    0.59
   0   6  17   15.33    0.84
   0   6 -17   13.64    0.82
   1   6  17    0.21    0.28
   1   6  17   -0.23    0.20
  -1   6 -17    0.31    0.20
   1  -6 -17   -0.08    0.15
  -1   6 -17   -0.11    0.23
  -1   6 -17   -0.29    0.26
   1   6 -17    0.16    0.19
  -1   6  17   -0.07    0.32
  -1   6  17   -0.42    0.22
  -1  -6 -17   -0.14    0.17
   1   6 -17   -0.09    0.22
   1   6 -17    0.04    0.27
  -2   6 -17    4.27    0.50
   2  -6 -17    4.53    0.30
   2   6  17    4.76    0.53
  -2   6 -17    4.53    0.40
  -2   6 -17    4.62    0.50
   2   6  17    3.75    0.46
  -2  -6 -17    4.14    0.34
  -2   6  17    4.55    0.46
   2   6 -17    4.14    0.35
   2   6 -17    4.78    0.50
  -2   6  17    3.92    0.48
   2   6 -17    3.73    0.49
  -3   6 -17    0.37    0.30
   3  -6 -17    0.44    0.16
   3   6  17    0.27    0.34
  -3   6 -17    0.46    0.25
  -3   6 -17    0.67    0.31
  -3   6  17    0.25    0.33
   3   6 -17    0.19    0.30
  -3  -6 -17    0.00    0.19
  -3   6  17    0.36    0.27
   0   6  18    0.03    0.29
   0   6 -18    0.56    0.28
  -1   6 -18    2.41    0.33
   1   6  18    3.26    0.49
  -1   6 -18    3.12    0.44
   1   6 -18    2.20    0.38
  -1   6  18    3.55    0.50
   0  -7   0    0.07    0.10
   0   7   0   -0.02    0.09
   0   7   0   -0.18    0.07
   0   7   0    0.02    0.09
  -1   7   0   24.51    0.85
  -1   7   0   25.18    0.87
   1  -7   0   23.81    0.83
  -1  -7   0   24.25    0.83
   1   7   0   24.19    0.83
   1   7   0   26.05    0.82
   1   7   0   24.02    0.81
  -1   7   0   24.56    0.83
   1   7   0   24.79    0.90
  -2   7   0    1.02    0.16
   2   7   0    1.16    0.18
  -2   7   0    1.12    0.16
  -2   7   0    1.02    0.16
   2   7   0    1.24    0.17
  -2  -7   0    0.69    0.14
   2  -7   0    1.17    0.16
   2   7   0    1.05    0.15
   2   7   0    1.25    0.15
   3   7   0   40.85    1.38
  -3   7   0   39.78    1.30
   3   7   0   42.44    1.25
   3   7   0   41.86    1.26
  -3   7   0   38.91    1.27
  -3   7   0   40.59    1.32
   3   7   0   40.72    1.29
   4   7   0    0.17    0.12
  -4   7   0    0.01    0.11
   4  -7   0    0.01    0.12
   4  -7   0    0.02    0.13
   4   7   0   -0.03    0.11
   4   7   0    0.01    0.13
   4   7   0    0.00    0.12
   5   7   0   14.89    0.61
   5  -7   0   14.18    0.62
   5   7   0   15.00    0.63
   5   7   0   14.08    0.66
   5  -7   0   13.70    0.66
   5   7   0   15.01    0.59
  -5   7   0   13.93    0.64
   6   7   0    9.26    0.51
  -6   7   0    8.29    0.50
   6   7   0    9.28    0.49
   6  -7   0    8.68    0.48
   6  -7   0    8.09    0.52
   7   7   0   16.93    0.73
   7  -7   0   16.59    0.73
   7  -7   0   15.90    0.79
  -7   7   0   14.73    0.76
   7   7   0   15.40    0.73
   8  -7   0    0.17    0.22
   8  -7   0    0.00    0.20
  -8   7   0    0.22    0.22
   9  -7   0    0.40    0.23
   9  -7   0    0.13    0.27
  -9   7   0    0.39    0.26
  10  -7   0    0.13    0.27
   0   7  -1   23.06    0.78
   0  -7   1   21.63    0.78
   0   7  -1   22.73    0.84
[truncated: 142,248 more chars]
